# Supplementary material for: Dormant but Active: Chilling Accumulation Modulates the Epigenome and Transcriptome of Prunus avium During Bud Dormancy
Source: Front Plant Sci. 2020 Jul 17;11:1115. doi: 10.3389/fpls.2020.01115 (PMC7380246; doi:10.3389/fpls.2020.01115)
Supplement: Supplementary file 2 [file Table_1.xlsx]

## Sheet: Table S1
Table S1. Primer sequences used for bisulfite and Sanger sequencing, Amplicon Bisulfite Sequencing (ABS) and real-time qPCR.
Primer	Sequence	Analysis
Retrotransposon	For: 5’- CTC AAT ATC CAC TAC GAT CCT CCT C -3’	Bisulfite
	Rev: 5’- CGG AAA ACA TCT TTG ACG AAC TGC -3’
Actin-binding component	For: 5’- GGA TAG AGT TGG TTG TAG ATT TGG TG -3’	Bisulfite
	Rev: 5’- CTC CTC AAT ACC TAA AAT ACT TCT ACC C -3’
Phosphatase 2A/promoter	For: 5’- Illumina adapter + ATA TGT TTA GTA AAY AGY TTA ATG -3’	ABS
	Rev: 5’- Illumina adapter + CCA AAC CTT TTT CCT TTC TTT TTC -3’
2-alkenal reductase/downstream	For: 5’- Illumina adapter + YAT AAT GTT GTA TTA AAA AAA AAA -3’	ABS
	Rev: 5’- Illumina adapter + AAA ACR CAT TTT CAR ARA ATA AA -3’
AMSH-like ubiquitin thioesterase 3 isoform X1	For: 5’- GGC CAA ATC TCC CCA AAG ATC AC -3’	qPCR
	Rev: 5’- CTC TTT CTG ATC ACC ACA ATG GTC C -3’
Flowering locus T (FT)	For: 5’- CCG CTT GTT GTT GGA AGA GT -3’	qPCR
	Rev: 5’- TGT TGG ACA ACT TGG GAA GG -3’
Transparent Testa 1	For: 5’- GAA GGA GTG GCC ATG AGG AAG AG -3’	qPCR
	Rev: 5’- GAA GGT CTT GCT GCA AAT GGA GC -3’
Flavonol synthase-like	For: 5’- GGG GCT TCT TTC TCA TCA CTG ACC -3’	qPCR
	Rev: 5’- GTC CCA TAC CCA TCA AAC CTC CC -3’
b-galactosidase	For: 5’- GT GAG CTA CGA CAG TCG GTC TC -3’	qPCR
	Rev: 5’- CTG CTC GAC GAT CTT CAC AAAC -3’
Cold-shock protein	For: 5’- GGA TGA GGC ACA GGA AGC GAA C -3’	qPCR
	Rev: 5’- CGC CAT ATC CAT ACC CAT CAG G -3’

## Sheet: Table S2
	Table S2. Parameters for P. avium whole genome bisulfite sequencing and mapping for each chilling hour condition and biological replicate (R1, R2 and R3) for 'Royal dawn' and 'Kordia'.
	Sample	Sequence pairs analyzed	Uniquely mapped reads	Multiple mapped reads	Reads with no alignment	Genome (338 Mbp) coverage of uniquely mapped reads
	Royal non-bisulfite treated	134134843	62127666	13414377	58592800	23X
	Royal 0 CH_R1	38691140	19369032	11063006	8259102	7X
	Royal 0 CH_R2	27291522	13621805	8269981	5399736	5X
	Royal 0 CH_R3	39292785	19310599	11785727	8196459	7X
	Royal 173 CH_R1	22817569	11321291	5612772	5883506	4X
	Royal 173 CH_R2	25643304	10901677	5513676	9227951	4X
	Royal 173 CH_R3	36969091	15370282	7965169	13633640	5X
	Royal 348 CH_R1	35059404	14721437	7545787	12792180	5X
	Royal 348 CH_R2	28908156	11765547	6460684	10681925	4X
	Royal 348 CH_R3	29814502	11607725	7027064	11179713	4X
	Royal 516 CH_R1	30067115	12302339	6535584	11229192	4X
	Royal 516 CH_R2	25976939	10483719	5703089	9790131	4X
	Royal 516 CH_R3	28043906	11384319	6403226	10256361	4X
	Kordia non-bisulfite treated	104531051	49172210	10408718	44950123	18X
	Kordia 0 CH_R1	40936851	20366503	11967102	8603246	7X
	Kordia 0 CH_R2	41328463	20069888	11806312	9452263	7X
	Kordia 0 CH_R3	34891290	17948817	9640465	7302008	6X
	Kordia 443 CH_R1	28433886	11964185	6225326	10244375	4X
	Kordia 443 CH_R2	30614852	12607288	6481426	11526138	4X
	Kordia 443 CH_R3	32476375	13226235	7248163	12001977	5X
	Kordia 1295 CH_R1	45317979	18972256	10101453	16244270	7X
	Kordia 1295 CH_R2	29208997	12095936	6303331	10809730	4X
	Kordia 1295 CH_R3	26209086	10354337	6425925	9428824	4X
	Kordia 1637 CH_R1	28549039	12313268	6101967	10133804	4X
	Kordia 1637 CH_R2	35264542	14947690	7707117	12609735	5X
	Kordia 1637 CH_R3	31624084	12653034	7281631	11689419	4X

## Sheet: Table S3
	Table S3. Absolute methylation levels for each chilling hour condition and biological replicate (R1, R2, R3) for P. avium var. 'Royal Dawn' and 'Kordia'. CG, CHG and CHH (H= C, T or A) represent the three methylation contexts.
	Sample	Total C's analysed	mCG	mCHG	mCHH
	Royal non-bisulfite treated	1676469339	0.991	0.994	0.995
	Royal 0 CH_R1	496395275	0.771	0.589	0.089
	Royal 0 CH_R2	248212004	0.761	0.582	0.092
	Royal 0 CH_R3	518817752	0.818	0.647	0.104
	Royal 173 CH_R1	253171099	0.726	0.534	0.096
	Royal 173 CH_R2	304899929	0.78	0.593	0.101
	Royal 173 CH_R3	435945280	0.792	0.612	0.096
	Royal 348 CH_R1	411044896	0.777	0.596	0.096
	Royal 348 CH_R2	332927230	0.808	0.637	0.093
	Royal 348 CH_R3	316542012	0.821	0.655	0.106
	Royal 516 CH_R1	339289037	0.775	0.591	0.094
	Royal 516 CH_R2	287201105	0.781	0.598	0.093
	Royal 516 CH_R3	300078894	0.774	0.583	0.1
	Kordia non-bisulfite treated	1308701538	0.99	0.993	0.995
	Kordia 0 CH_R1	353097880	0.782	0.608	0.101
	Kordia 0 CH_R2	358895727	0.774	0.599	0.1
	Kordia 0 CH_R3	341967435	0.726	0.539	0.089
	Kordia 443 CH_R1	262987768	0.745	0.555	0.092
	Kordia 443 CH_R2	274713353	0.747	0.561	0.096
	Kordia 443 CH_R3	287166769	0.753	0.566	0.098
	Kordia 1295 CH_R1	374968555	0.74	0.553	0.098
	Kordia 1295 CH_R2	265969312	0.755	0.57	0.103
	Kordia 1295 CH_R3	195851496	0.793	0.623	0.109
	Kordia 1637 CH_R1	277434342	0.739	0.553	0.1
	Kordia 1637 CH_R2	315875931	0.746	0.563	0.1
	Kordia 1637 CH_R3	252192513	0.777	0.599	0.105

## Sheet: Table S4
	Table S4. Differentially methylated regions among all the conditions (DMRs; log2FC > 3; FDR < 0.01) identified 2000 bp over genes for sweet cherry var. 'Royal Dawn' using three biological replicates (R1, R2 and R3). Methylation level is indicated as the mean log2 enrichment in the DMR for each sample.
	Chr	DMR Start	DMR End	DMR Size	Gene ID	Features	Mean 0CH R1 enrichment	Mean 0CH R2 enrichment	Mean 0CH R3 enrichment	Mean 173CH R1 enrichment	Mean 173CH R2 enrichment	Mean 173CH R3 enrichment	Mean 348CH R1 enrichment	Mean 348CH R2 enrichment	Mean 348CH R3 enrichment	Mean 516CH R1 enrichment	Mean 516CH R2 enrichment	Mean 516CH R3 enrichment	q-value	log2 fold change 173CH vs 0CH	log2 fold change 348CH vs 0CH	log2 fold change 516CH vs 0CH
	pseudo17	4542640	4543481	429	Pav_sc0001528.1_g160.1.mk	glycine-rich cell wall structural protein 1.8-like	-2.29717	-4.00666	-3.30962	-2.73324	-0.531957	0.473709	1.51187	-0.968202	2.23416	1.1761	1.15893	2.57245	1.07133e-05	2.60548	4.46017	4.83215
	pseudo24	8854004	8854675	362	Pav_sc0008783.1_g030.1.br Pav_sc0008783.1_g040.1.br	Unknown Unknown	-1.25468	-1.03068	-2.5925	-2.18554	3.29446	3.93832	4.00619	3.39182	5.31942	4.37728	1.89753	4.93145	-6.07321e-12	4.56109	5.95171	5.67848
	pseudo21	8537332	8538051	359	Pav_sc0003121.1_g030.1.br	Tag=/pseudo	-3.35177	-3.67886	-4.70918	-3.37486	1.04846	0.221847	2.37035	0.802347	2.92207	1.36682	3.08388	1.13555	9.22146e-06	3.95847	6.07992	5.95099
	pseudo5	4630167	4631063	357	Pav_sc0000244.1_g100.1.br Pav_sc0000244.1_g110.1.br	Unknown Tag=/pseudo	-1.47116	-4.05451	-5.80777	-5.70542	1.75419	1.67182	-0.937792	-2.61265	2.56374	1.55988	0.0343347	2.33024	1.01712e-05	3.90641	3.91062	4.35873
	pseudo13	5183395	5184384	317	Pav_sc0000941.1_g020.1.br	uncharacterized protein LOC103963587	-2.0649	-0.621877	-2.03089	-4.22084	-1.27306	1.10874	1.17966	-0.904159	1.65991	1.66333	2.78887	0.618046	0.000540166	1.21093	2.39438	3.35686
	pseudo10	1395062	1396880	292	Pav_sc0000617.1_g150.1.br	Unknown	-2.78387	-3.30318	-1.26037	-0.924971	0.383083	-0.950723	-0.562826	-3.1587	0.161459	0.74986	0.0139808	1.43442	0.000376422	1.82241	1.52245	3.02224
	pseudo11	3047762	3048795	289	Pav_sc0000704.1_g790.1.br Pav_sc0000704.1_g800.1.mk	Unknown sphinganine C(4)-monooxygenase 1-like	-1.73286	-4.78903	-3.64878	-2.92933	-1.95177	0.603205	0.266792	1.08119	1.76479	0.16101	1.58904	3.02104	1.96831e-05	2.19545	4.01059	4.87675
	pseudo18	702264	703146	284	Pav_sc0001709.1_g150.1.br	Unknown	-3.53597	-4.13634	-5.52853	-4.89751	-1.44022	-4.32078	0.15064	-1.27736	-5.83148	1.39885	-0.749404	3.2382	0.000189595	1.45646	3.22483	6.26484
	pseudo1	1487436	1488063	274	Pav_sc0000009.1_g200.1.br	Unknown	-0.235245	-3.3756	-1.0798	0.113145	2.50706	2.96236	1.74973	-2.15761	1.97984	2.69568	-0.0480252	2.30003	8.94326e-05	3.35909	2.40809	3.12398
	pseudo5	2019316	2020015	270	Pav_sc0000220.1_g2460.1.mk	probable WRKY transcription factor 61 isoform X1	-2.13266	-2.17376	-3.33396	-3.46684	-0.132997	2.12769	0.320694	-0.756667	2.03696	-0.64974	0.919413	1.64907	0.000159244	3.29115	3.43712	3.36763
	pseudo5	4501337	4501988	268	Pav_sc0000243.1_g690.1.br	Unknown	-4.52746	-4.96484	-2.91247	-4.45602	-0.948578	0.199054	-1.08279	-0.583517	2.56146	2.3946	-1.30069	2.08023	4.71991e-06	3.03934	5.08004	5.57036
	pseudo23	3558615	3559093	256	Pav_sc0004894.1_g060.1.br	pollen-specific leucine-rich repeat extensin-like protein 3	0.358884	-2.04598	0.475799	2.23009	2.24234	3.82889	3.59287	2.53055	3.86685	4.31182	-0.144486	3.52628	5.76804e-05	3.01915	3.47577	3.46924
	pseudo14	1125377	1126139	252	Pav_sc0001033.1_g320.1.br	Tag=/pseudo	-3.03902	1.26436	-0.177959	1.57412	3.46692	3.89451	2.80424	2.29236	4.42221	3.54985	2.10398	2.58994	0.00029901	3.08447	3.2896	2.69262
	pseudo10	5457333	5457870	242	Pav_sc0000638.1_g830.1.br	Unknown	1.06384	-2.93897	-5.40413	-3.85562	-0.246987	2.00084	2.33162	1.81352	2.72149	2.39376	2.06457	3.54422	2.95865e-05	1.13052	2.7543	3.23306
	pseudo14	2917294	2917726	234	Pav_sc0001057.1_g470.1.br	probable copper-transporting ATPase HMA5	-1.94251	-1.63773	-0.394484	-0.95392	1.76345	3.93753	3.07488	2.5167	2.55183	2.04373	2.87467	1.11637	5.78743e-05	3.84084	3.89815	3.34354
	pseudo3	5133830	5134499	230	Pav_sc0000116.1_g160.1.br Pav_sc0000116.1_g170.1.br	uncharacterized protein LOC103963587 probable copper-transporting ATPase HMA5	-2.05527	-1.22841	-0.876828	-1.17619	1.31544	2.22938	2.39646	-1.30022	3.31475	1.4743	-1.40187	2.46959	0.000300549	2.65257	3.68812	2.84298
	pseudo15	2096549	2097223	228	Pav_sc0001181.1_g1050.1.br	uncharacterized protein LOC103446245	-0.695885	-1.83	-1.45037	2.58176	2.50424	3.34774	3.03405	2.64556	3.12078	-0.412027	3.77532	3.88235	0.000166051	4.11036	4.19416	4.52887
	pseudo19	8478828	8479856	228	Pav_sc0002208.1_g560.1.br	Unknown	-3.41375	-4.50388	-2.29932	-4.56856	-1.11799	0.380069	-1.71682	1.74307	-0.167542	-1.43689	-2.62741	0.746402	0.000723911	2.40329	3.73521	2.69513
	pseudo15	8355718	8356452	227	Pav_sc0001258.1_g550.1.br	Unknown	-2.50617	-2.18411	0.0972685	-3.55796	1.63685	0.0669728	2.75308	1.58342	1.3518	0.812692	2.88106	2.05612	0.00032565	1.53314	3.06778	3.1797
	pseudo5	1890119	1890611	222	Pav_sc0000220.1_g2170.1.mk	CWF19-like protein 2	-2.41176	-3.52018	-2.06496	0.304058	-0.823748	1.21429	1.18163	2.19248	1.2816	2.51786	1.40752	1.81798	1.10235e-09	3.00253	4.17255	4.53355
	pseudo9	8510109	8510634	218	Pav_sc0000588.1_g260.1.mk	Unknown	-3.7455	-5.26763	-1.70152	-5.86025	0.687539	0.898008	1.97812	-3.70428	2.31467	-1.03438	-0.410822	1.50199	1.31027e-10	3.09717	4.46198	3.31944
	pseudo5	3437714	3438670	216	Pav_sc0000233.1_g070.1.br	Unknown	-4.01568	-3.61188	-1.58399	-4.0006	-4.70358	1.75323	-0.380082	-0.240408	2.76415	-1.19078	0.588433	0.967528	0.000298994	2.86317	4.13923	3.02983
	pseudo12	6691241	6691954	215	Pav_sc0000848.1_g410.1.br	Unknown	-1.72156	-3.55658	-1.54306	-2.59459	2.28941	1.85868	1.42139	1.23886	3.64589	0.929972	0.509288	1.14221	2.30045e-05	3.56917	4.58524	2.92012
	pseudo15	9646595	9647195	215	Pav_sc0001275.1_g410.1.mk	probable receptor-like protein kinase At1g80640	0.745834	-1.04058	0.234284	-1.79875	3.58289	1.77638	2.65874	2.47317	4.28903	3.29085	1.94141	2.4128	0.00020075	2.23272	3.23386	2.50475
	pseudo7	5291564	5292223	215	Pav_sc0000410.1_g300.1.br	Unknown	-2.89427	-2.5277	-2.42635	-4.30458	-2.23068	1.5729	-2.11057	-4.2479	2.07748	3.01948	1.23647	2.67731	4.44513e-05	2.71295	3.18903	5.09321
	pseudo6	6253263	6254224	213	Pav_sc0000351.1_g350.1.br	Unknown	-4.61991	-5.01558	-1.63454	-1.54017	-3.35428	0.285768	-1.84506	-0.515411	2.25872	2.07621	-2.08436	3.18503	7.63353e-05	2.07677	3.87196	5.10494
	pseudo1	730559	731355	212	Pav_sc0000006.1_g490.1.mk	gamma-tubulin complex component 2	-2.76848	-5.23279	-4.87313	-2.57041	1.15325	-0.0878209	1.7432	1.7663	3.04836	-0.633133	0.912505	3.22845	1.63271e-05	4.00601	6.17803	5.84184
	pseudo8	10421765	10422717	212	Pav_sc0000546.1_g320.1.br	Unknown	0.0897262	-2.49253	-1.57309	-2.39173	0.747995	2.57592	0.322072	2.1983	3.28838	-0.658138	0.896135	0.211502	0.000209002	2.31142	3.30631	1.2109
	pseudo12	4605380	4606027	210	Pav_sc0000830.1_g180.1.mk	serine--glyoxylate aminotransferase	-6.01936	-5.83143	-3.20347	-6.06122	0.677226	-3.34306	-0.247808	0.87077	3.29497	-1.54045	-0.27372	3.5823	1.11827e-05	3.59694	6.46297	6.53763
	pseudo19	9804213	9804867	210	Pav_sc0002250.1_g300.1.br	ATP-dependent zinc metalloprotease FtsH	-2.71928	-3.10966	-1.95007	-1.00219	0.296953	2.97163	1.65507	2.56628	2.1336	1.50548	-0.60096	2.8506	0.000129368	4.18431	4.67612	4.34657
	pseudo23	5851812	5852380	210	Pav_sc0005314.1_g040.1.br	Unknown	-1.6519	-0.591648	-2.88978	-1.29182	-0.638023	1.75774	2.46819	0.407835	2.1786	1.30272	-0.624055	0.0993847	2.35315e-06	1.98891	3.35008	1.90667
	pseudo10	4338923	4339478	209	Pav_sc0000631.1_g030.1.br	Unknown	-3.08748	-3.86944	-1.62344	-0.524873	0.0967729	0.84753	0.229468	-1.63914	1.66986	1.19161	3.15809	2.15725	0.000347772	2.80308	3.19471	4.9397
	pseudo15	1267333	1268053	207	Pav_sc0001171.1_g410.1.mk	Unknown	-1.02931	-2.35744	-3.5016	0.645251	-0.236049	0.0220223	2.44555	-0.423596	0.587113	0.896803	-0.139764	1.31766	0.000100553	2.14832	3.31471	2.76644
	pseudo6	4458449	4458920	207	Pav_sc0000334.1_g670.1.br	Unknown	-2.98312	-5.72892	-5.25393	-5.28586	-0.952083	0.486213	2.81163	-1.02681	1.91729	-4.14342	-0.465362	0.920222	1.5177e-05	3.50194	6.04025	3.96206
	pseudo14	6179496	6180037	205	Pav_sc0001094.1_g010.1.br	putative ribonuclease H protein At1g65750	-3.69905	-4.60392	-1.67373	-1.4819	0.668526	1.64642	2.57843	1.8784	2.8364	1.6025	2.19426	2.30653	9.64656e-05	3.55663	5.28206	4.86314
	pseudo15	9950410	9950847	205	Pav_sc0001278.1_g220.1.br	Unknown	-2.75999	-6.03825	-1.13955	-4.08619	0.867612	0.525068	0.131814	1.2791	3.08807	0.0820908	1.65782	2.24361	5.12538e-11	2.42954	4.28536	3.85911
	pseudo16	8374695	8375228	204	Pav_sc0001411.1_g080.1.mk	O-acyltransferase WSD1-like	0.147179	-1.01735	-1.06563	0.898524	0.174601	3.52084	3.02395	3.25416	3.19325	2.95194	0.168923	2.53496	1.73835e-09	2.79908	3.68931	2.81757
	pseudo24	3107912	3108481	204	Pav_sc0006915.1_g010.1.br	hypothetical protein	-3.39844	-2.35445	-3.31519	-0.157436	0.63087	0.940797	-1.77996	0.37748	1.75081	1.30277	-0.00655228	1.65112	3.26588e-05	3.48122	3.66443	4.07851
	pseudo24	3508188	3508638	203	Pav_sc0006999.1_g050.1.mk	cullin-associated NEDD8-dissociated protein 1	-2.41128	-1.48528	1.06045	0.691318	1.42019	0.569698	2.10923	1.4233	2.66481	2.16961	3.03412	3.87874	2.27391e-07	1.13439	2.342	3.38066
	pseudo16	3623284	3623967	202	Pav_sc0001331.1_g070.1.br	Unknown	-2.76313	-4.10474	-3.90918	-1.37291	-3.08608	2.15762	0.598931	-3.00879	0.334364	-0.0281278	-0.816202	0.682902	0.000274416	4.19037	3.41427	3.53556
	pseudo9	7961921	7962365	201	Pav_sc0000586.1_g430.1.br	Unknown	-1.07095	-4.64467	-4.3566	-0.213589	2.60205	0.663045	0.154451	-0.152134	-0.895546	-2.67957	1.46691	0.808725	2.65948e-05	3.91459	2.17496	3.04825
	pseudo4	5463579	5464451	199	Pav_sc0000184.1_g490.1.br	Unknown	-2.37025	-4.14658	-4.10818	-4.46764	-2.83933	-1.78786	-0.256049	-3.84859	2.2287	-0.457318	0.483583	-0.0860747	0.000719672	0.624213	4.18351	3.31726
	pseudo6	8152971	8153641	199	Pav_sc0000359.1_g290.1.mk Pav_sc0000359.1_g300.1.mk	mitochondrial outer membrane protein porin 4 protein YIPF6 homolog	-1.46993	-1.20538	-1.14609	-2.70459	-1.33922	2.39369	2.75951	2.63642	3.60793	0.130441	2.6702	3.05445	9.9883e-05	2.21907	4.33644	3.661
	pseudo24	9165725	9166490	197	Pav_sc0008902.1_g010.1.br	SAM domain-containing protein SAMSN-1, partial	0.601372	-1.88627	2.1037	-0.504038	-1.88916	-1.86555	-1.10904	-1.49909	0.295612	-1.72546	-3.17002	-3.28792	0.00262502	-2.28407	-1.57349	-3.5603
	pseudo16	6366912	6367319	196	Pav_sc0001381.1_g040.1.mk	Unknown	-1.67194	-3.46753	-1.16461	-3.06913	-3.9968	0.973265	1.22342	-1.79487	3.23707	2.44419	1.20761	2.91317	2.62774e-05	1.33496	3.82513	4.16793
	pseudo11	5969142	5969734	192	Pav_sc0000736.1_g100.1.mk	LOW QUALITY PROTEIN: organic cation/carnitine transporter 3-like	2.83356	-1.64801	-1.11707	0.260332	0.850062	2.50176	0.428778	-1.16184	1.20071	-2.50868	-2.7863	-0.827009	0.00134046	0.131659	-0.950735	-3.16066
	pseudo11	5463078	5463713	191	Pav_sc0000731.1_g030.1.br	Unknown	-1.78527	-2.17737	-0.963666	-1.91811	0.937117	1.64373	0.247598	2.14621	1.45382	2.19311	2.07932	0.618106	0.000903959	2.37294	3.02818	3.33516
	pseudo4	7540285	7540859	190	Pav_sc0000201.1_g330.1.br	Unknown	-2.93313	-0.903041	-0.441375	1.14581	2.50624	2.43999	2.27261	2.68551	3.75782	3.13857	2.55718	3.19211	0.000205727	3.24796	4.14422	4.08719
	pseudo19	6770251	6770671	189	Pav_sc0002181.1_g050.1.br	Unknown	0.397985	-0.756182	-3.47158	0.980588	2.75269	1.74523	1.42592	1.47999	3.90849	3.1153	2.48415	3.50108	2.39965e-05	2.5929	3.35714	3.67719
	pseudo24	8638553	8638943	188	Pav_sc0008697.1_g140.1.br	hypothetical protein PRUPE_ppb023711mg, partial	-3.90697	-4.26214	-0.951006	-4.98709	-3.40499	0.677363	3.09481	-4.25882	3.80933	0.86356	3.22075	-1.87223	2.06246e-06	1.43951	5.15199	4.16569
	pseudo9	10222359	10222913	188	Pav_sc0000597.1_g090.1.br	uncharacterized protein LOC103336567	-0.269587	-5.14044	0.253644	0.552487	0.890052	3.53601	1.3573	3.16251	3.3298	3.25474	-2.75718	2.8199	6.4291e-05	2.86342	3.39528	3.03073
	pseudo13	8230970	8231555	186	Pav_sc0000998.1_g120.1.mk	acylamino-acid-releasing enzyme-like isoform X1	-5.62965	-5.76974	-3.46428	-3.40651	0.624138	-0.357287	0.707142	1.61302	1.93911	2.14488	-2.06168	3.41374	8.42904e-05	4.22585	6.04499	6.89037
	pseudo19	1285261	1285753	186	Pav_sc0001963.1_g380.1.br	Unknown	-3.02731	-3.4661	-5.05581	-1.06454	-2.09531	0.996653	2.56779	1.98336	0.987724	1.5357	-2.70446	1.5551	1.59624e-05	3.47669	5.60851	4.62258
	pseudo2	1597047	1597529	185	Pav_sc0000055.1_g560.1.mk	beta-fructofuranosidase, insoluble isoenzyme 1-like	-5.54032	-2.68161	-2.51989	-2.46139	1.1034	2.34008	-0.403388	-1.80277	-0.799588	2.45017	-0.572756	2.2097	6.75951e-05	4.39379	2.20105	4.93553
	pseudo14	1072910	1073464	178	Pav_sc0001033.1_g170.1.br	Unknown	-2.22966	-3.78822	-3.84122	-4.93246	-1.95869	0.961197	-1.98697	0.737014	1.09789	0.234197	2.57615	2.14629	7.68774e-06	2.65416	3.5139	5.02453
	pseudo2	1009330	1009822	178	Pav_sc0000054.1_g050.1.br	Unknown	-4.17364	-3.97221	-3.96001	-2.06427	-1.35861	2.24311	0.495737	-4.28897	-2.56986	-0.352891	-4.12964	-3.24876	0.000319748	4.87016	3.15158	2.36596
	pseudo10	1883035	1883407	177	Pav_sc0000620.1_g070.1.br	putative fasciclin-like arabinogalactan protein 20	-1.21038	-0.707267	-1.58104	1.4187	1.49972	-0.334996	1.12506	-1.85019	4.38709	1.86619	3.00358	3.09062	0.000154958	2.19051	4.08386	3.87166
	pseudo15	4059383	4059989	176	Pav_sc0001196.1_g1840.1.mk	auxin response factor 1	-3.2025	-2.17527	-2.58106	0.950956	0.155411	1.43776	1.16033	-0.0559558	-1.21765	-0.110363	-0.936164	-1.44796	3.30633e-07	3.53329	2.86703	1.86863
	pseudo20	9744864	9745603	174	Pav_sc0002623.1_g090.1.br Pav_sc0002623.1_g100.1.br	uncharacterized protein LOC103400347 L-ascorbate oxidase-like	-0.84667	-2.54966	-1.41934	-0.711961	0.643586	1.98457	1.59737	1.01684	1.639	2.7858	-0.864067	1.98485	7.77976e-05	2.47744	2.89078	3.37296
	pseudo8	4199625	4200020	174	Pav_sc0000491.1_g920.1.br	Unknown	-3.34967	-2.65847	-4.26483	-4.03483	-5.19433	-1.44374	-1.78322	0.245003	1.89005	2.32602	-0.587151	2.18957	3.95898e-05	0.56355	4.07019	5.05301
	pseudo20	3228085	3228381	172	Pav_sc0002360.1_g890.1.br	Unknown	-4.61968	-3.70501	-4.97974	-4.21256	0.120148	0.67083	2.12162	-1.25771	2.13264	2.87109	1.57406	1.47349	2.12979e-08	4.19652	5.94075	6.4544
	pseudo22	3759478	3759882	172	Pav_sc0003614.1_g070.1.br	Unknown	-0.361375	-4.07159	-4.71333	-1.05877	-2.53845	-0.178414	0.482954	-2.03638	1.87853	-1.7532	-0.485476	2.97103	0.000169091	0.810002	2.60196	3.33696
	pseudo17	2236883	2237316	171	Pav_sc0001488.1_g400.1.mk Pav_sc0001488.1_g410.1.mk	bifunctional epoxide hydrolase 2-like hypothetical protein B456_002G103400	-2.87349	-4.33934	-5.2302	-2.8263	0.494693	-0.231566	1.11113	0.313336	-0.213638	1.49028	-0.728847	2.1193	0.000211576	3.49855	4.32705	5.1901
	pseudo25	3760863	3761175	171	Pav_sc0011803.1_g010.1.br	GATA zinc finger domain-containing protein 16-like	-1.90692	-2.15217	1.77882	-2.30376	3.24323	2.45035	3.5193	3.12476	3.895	4.1283	3.27874	3.49599	8.12167e-06	1.94802	3.15999	3.29387
	pseudo6	6425705	6426232	170	Pav_sc0000351.1_g590.1.mk	signal recognition particle subunit SRP72	-1.92448	-0.573164	-0.0803199	0.941632	-0.400505	0.910305	1.73873	2.53608	2.91251	0.187896	0.334265	1.39505	0.000501057	1.27649	3.14708	1.41868
	pseudo17	7170920	7171513	168	Pav_sc0001580.1_g450.1.br	Unknown	-1.58573	-1.52262	-2.76246	-0.204805	2.36662	2.66432	-0.018398	1.41744	2.06874	-0.423088	-1.37905	-1.46076	0.000272509	3.89939	3.24465	0.850076
	pseudo13	10248334	10249010	167	Pav_sc0001017.1_g010.1.br	uncharacterized protein LOC103337363	-4.72866	-5.17263	-3.64734	-1.23346	-0.132769	-0.529552	-1.62113	-0.78389	0.716514	0.298517	1.32199	-1.99802	0.000364405	3.80498	4.13338	4.77628
	pseudo9	6421775	6422363	167	Pav_sc0000582.1_g720.1.mk Pav_sc0000582.1_g730.1.mk	Unknown Unknown	-1.08844	-2.66693	-2.38568	-0.69674	-3.99346	1.36304	1.09976	-1.78876	2.72646	1.6363	0.220124	-0.767668	0.000204454	1.98924	3.46598	2.56913
	pseudo21	2017634	2018161	166	Pav_sc0002792.1_g180.1.br	Unknown	-2.38589	-5.12717	-5.13823	-3.83135	-2.5208	-0.0769108	2.18661	-1.08934	-1.03256	1.53034	-0.382441	-3.43746	0.000106194	2.26373	4.472	3.91576
	pseudo10	2528242	2528808	164	Pav_sc0000624.1_g160.1.mk	pre-mRNA-splicing factor 38B	-1.5863	-2.1033	-3.64007	0.347636	1.76496	1.23952	1.97693	1.57691	2.52593	1.57894	-1.52078	1.01753	5.89955e-05	3.44448	4.29488	3.05283
	pseudo15	4697027	4697367	163	Pav_sc0001204.1_g030.1.br	Unknown	-1.04265	-5.25233	-4.24727	-1.21213	0.253056	2.23812	0.307745	0.591636	-1.09034	-1.94075	-0.190812	2.94574	2.76459e-05	3.49015	2.50994	3.96966
	pseudo5	4382713	4383355	162	Pav_sc0000243.1_g430.1.mk	ribonuclease 3-like protein 1	-1.866	-2.86718	-2.71011	0.00900586	0.928094	2.04566	1.83549	1.60018	1.01887	0.803247	-0.736447	0.295135	0.000151626	3.6408	3.93458	2.66254
	pseudo8	10212880	10213231	162	Pav_sc0000545.1_g060.1.br	Unknown	-4.10908	-5.30359	-5.29005	-4.67508	-5.71821	0.380116	1.37923	0.768643	3.29534	0.152225	-1.33287	3.12297	-1.85373e-11	3.64306	7.0198	6.55322
	pseudo17	10838049	10838782	161	Pav_sc0001695.1_g030.1.br Pav_sc0001695.1_g040.1.mk	transcription initiation factor IIB-2-like peroxygenase	-1.3106	-4.56881	-4.04661	-0.144428	-2.36882	0.117953	-0.401971	-1.01272	1.50547	1.06113	-0.548632	0.31302	0.000175196	2.11002	3.01602	2.98787
	pseudo14	6803002	6803411	160	Pav_sc0001102.1_g860.1.mk	endoglucanase 8-like	-3.27972	-3.73564	-3.78182	-1.74666	0.897413	1.27959	1.41874	3.1431	3.11337	0.492483	1.96998	4.43117	0.000209195	4.19372	6.32927	6.74513
	pseudo18	8895866	8896428	158	Pav_sc0001869.1_g930.1.br	Unknown	-2.58	-1.60061	-1.4632	-2.30866	0.998371	0.306739	-0.00476036	-1.3505	0.347548	1.60858	-1.25685	2.67652	0.000231037	1.99909	1.63026	3.5199
	pseudo19	1589352	1589891	158	Pav_sc0001974.1_g010.1.mk	Metal tolerance protein C2	-1.95039	-2.508	-1.68678	-5.49457	-0.889594	2.70017	-3.17179	2.09665	3.06942	1.97294	0.69199	0.974296	2.51548e-05	3.24418	4.10047	3.33239
	pseudo22	3829717	3830037	156	Pav_sc0003614.1_g220.1.mk	ribosome biogenesis protein BMS1 homolog isoform X2	-1.28816	-0.915714	-0.976642	-2.39687	1.0852	2.35485	-0.109046	1.71059	3.72404	0.066027	0.204865	1.8769	0.000191564	2.35899	3.58844	2.02014
	pseudo24	9714048	9714356	156	Pav_sc0009150.1_g010.1.br	Unknown	1.02685	-3.23698	-2.94228	-1.61762	1.39581	1.99649	0.157469	1.98955	3.68961	3.8781	0.6621	4.02013	1.51171e-08	1.61143	2.984	3.83779
	pseudo13	9874900	9875179	155	Pav_sc0001014.1_g060.1.mk	AMSH-like ubiquitin thioesterase 3 isoform X1	1.4686	-1.75853	1.04314	-2.80635	4.10396	4.03599	2.76756	3.49185	5.58384	3.97451	4.43861	4.98798	3.01849e-05	2.71929	3.68767	3.75422
	pseudo17	8422229	8422533	154	Pav_sc0001613.1_g540.1.mk	uncharacterized protein LOC103942829 isoform X2	-1.33627	-1.77238	-0.475737	-2.43962	2.20558	1.5415	0.272293	-0.722571	3.38699	1.64253	0.058558	2.59237	0.000188828	2.45283	3.12415	2.8562
	pseudo22	239997	240812	153	Pav_sc0003283.1_g040.1.mk	beta-amyrin 28-oxidase-like	1.09104	1.62967	1.5901	-2.30463	-0.916731	-2.19227	-0.313926	0.100961	-1.66361	-1.09302	-0.870466	0.00266134	7.48689e-07	-3.11443	-1.90921	-2.0292
	pseudo11	1545204	1545614	152	Pav_sc0000700.1_g520.1.mk	cation/calcium exchanger 5-like	-0.880201	-0.151435	1.08109	0.682336	2.71065	3.49453	2.20954	2.8755	4.41942	3.55349	3.39591	3.77021	0.000540583	2.44802	3.22855	3.33478
	pseudo14	3084055	3085001	150	Pav_sc0001059.1_g380.1.br	Unknown	-3.30538	-5.30867	-1.64428	-2.4961	-4.92553	0.424549	1.03503	0.114944	0.233141	-2.80202	-0.83823	0.0406205	0.00204779	1.79837	3.27079	1.95578
	pseudo13	2131439	2131934	148	Pav_sc0000893.1_g800.1.mk	anthranilate synthase beta subunit 1, chloroplastic-like isoform X1	-0.979591	-1.89839	-1.1805	0.508498	-0.270507	2.93863	0.915102	0.421116	1.5361	0.425606	2.02958	-0.919021	0.000294004	3.0273	2.33184	2.29126
	pseudo13	801775	802323	146	Pav_sc0000888.1_g090.1.br	Unknown	-2.2354	-2.95711	-3.39852	-1.53279	-0.0835597	-1.29909	-2.10596	1.20564	0.392777	-1.27544	-0.702615	1.73176	0.000137746	1.95961	3.14318	3.31836
	pseudo16	1033193	1033960	146	Pav_sc0001305.1_g270.1.br	Unknown	-4.15235	-3.94979	-4.77805	-3.83274	-1.85921	-2.35124	1.55162	-5.24322	-1.51423	-1.19617	-2.45521	2.40894	0.000106918	1.78332	4.39346	5.23546
	pseudo8	7167697	7168048	146	Pav_sc0000506.1_g080.1.br	probable LRR receptor-like serine/threonine-protein kinase RFK1 isoform X1	-0.732648	-0.0304984	-1.57329	2.20001	1.89924	0.49274	1.37342	1.89012	0.833145	2.51817	2.86206	3.25583	0.000157418	2.34396	2.0754	3.55634
	pseudo11	5535826	5536239	145	Pav_sc0000731.1_g150.1.br	uncharacterized protein LOC103444068	-2.06502	-1.62528	-2.89041	-3.98117	-1.59336	1.74785	-0.441802	-2.76943	1.38727	0.479504	-2.22607	2.5205	2.47065e-10	2.42687	2.32553	3.39564
	pseudo3	6142788	6143050	145	Pav_sc0000123.1_g790.1.br	Unknown	-0.220595	0.0939443	1.97173	0.389067	2.48716	3.49702	1.80193	2.66381	5.62763	4.03625	2.18068	4.40245	1.82008e-05	1.63848	3.34118	2.84745
	pseudo21	7777059	7777845	144	Pav_sc0003079.1_g040.1.br	uncharacterized protein LOC103930210	-2.17671	-3.03805	-2.62886	-2.86648	0.308193	-0.783168	-0.318972	-2.69566	-2.43561	-0.606206	0.186819	1.30796	1.31217e-05	1.95497	1.17689	3.0814
	pseudo7	6892879	6893283	144	Pav_sc0000420.1_g020.1.br	LRR receptor-like serine/threonine-protein kinase GSO1	-3.50133	-0.994427	-0.942342	2.17199	1.41353	1.80933	1.01213	-2.95407	-0.456344	-0.057524	-0.395183	1.26015	6.76294e-05	3.2648	1.37207	1.89005
	pseudo19	10213390	10213651	143	Pav_sc0002266.1_g160.1.mk	Unknown	-3.40869	-4.79011	-4.01923	-4.31649	2.43188	1.83868	3.06964	2.53573	1.37099	-4.21024	1.72539	-1.62155	3.36416e-06	5.55458	6.44972	4.26291
	pseudo2	9724685	9725778	143	Pav_sc0000095.1_g560.1.mk Pav_sc0000095.1_g570.1.br	putative ribonuclease H protein At1g65750 hypothetical protein	-1.16329	-2.57419	-0.354861	1.49406	0.248074	1.5861	2.73774	1.63043	1.68561	0.586711	-0.866508	1.04785	0.00119162	2.32709	3.21689	1.56019
	pseudo22	6798277	6798930	143	Pav_sc0003851.1_g080.1.br	Unknown	-0.877802	-4.12423	-4.44663	-4.43096	0.14221	2.6966	0.838243	-4.60922	2.67519	0.653103	-0.216485	3.27628	0.00025216	3.55946	3.66572	4.2268
	pseudo7	5333252	5333566	142	Pav_sc0000410.1_g380.1.br	Tag=/pseudo	-3.34352	-0.61966	-0.959375	1.05197	-3.30748	1.28109	1.66391	0.245703	2.54705	2.7545	1.22457	2.65328	3.0608e-06	1.86551	3.01276	3.60504
	pseudo2	2274088	2274392	141	Pav_sc0000060.1_g020.1.br	Unknown	-2.32205	-4.28604	-2.92192	-4.51353	1.38556	3.75145	2.86899	1.49483	3.5055	2.93308	2.6423	2.99213	-1.53383e-10	5.39502	5.80883	5.83257
	pseudo10	4049023	4049724	140	Pav_sc0000625.1_g370.1.mk	hypothetical protein PRUPE_ppa015159mg	-1.80202	-4.70003	-5.79155	-2.80263	-0.98343	-0.673859	-0.54332	0.919821	-1.15085	-1.17419	-1.97625	0.340603	6.56823e-06	1.89401	3.14103	2.51594
	pseudo15	4196744	4197279	140	Pav_sc0001196.1_g2060.1.br	Unknown	-1.40593	-4.7496	-4.31984	-4.14213	0.0872589	-1.12051	2.08135	-4.04548	-2.35117	-1.30123	-0.438843	1.74147	0.0001277	1.76481	3.27213	3.27171
	pseudo3	5932683	5933112	139	Pav_sc0000123.1_g010.1.br Pav_sc0000123.1_g020.1.br	Unknown Unknown	-5.70556	-3.53097	-5.62916	-1.55061	-0.789485	0.999415	-0.902699	-0.89306	1.78198	-3.85571	2.37027	-4.34995	5.36471e-05	4.53542	5.16377	5.39275
	pseudo1	5803882	5804436	138	Pav_sc0000028.1_g770.1.mk	DEAD-box ATP-dependent RNA helicase 46	-1.86499	-1.51591	-1.15278	2.39557	0.646996	2.58947	-0.0899545	0.105278	-0.146565	-0.23547	-0.911072	1.66055	2.57828e-09	3.58037	1.44236	2.08057
	pseudo11	7154704	7155290	138	Pav_sc0000745.1_g410.1.br	Unknown	-5.12982	-5.18338	-3.55517	-5.10606	1.20374	-0.953863	1.32269	-4.95391	2.24838	1.49868	-1.70916	-1.61976	7.22056e-05	4.33495	5.68962	4.61422
	pseudo13	682547	682958	138	Pav_sc0000886.1_g820.1.mk Pav_sc0000886.1_g830.1.br	hypothetical protein PRUPE_ppa002286mg Unknown	-1.7235	-4.47989	-5.88526	-6.0618	-0.581633	-2.50457	-5.92993	1.54782	3.44901	-2.89558	-0.715029	0.740648	1.78037e-06	1.23722	5.24878	2.72755
	pseudo13	3778913	3779671	138	Pav_sc0000910.1_g020.1.br	Unknown	-1.248	-1.99042	-3.7176	1.51236	-0.384226	1.88521	-0.50725	-2.08176	-2.9342	-1.27555	-1.52609	-0.568819	7.7603e-05	3.28798	0.515968	0.938021
	pseudo14	6103922	6104687	138	Pav_sc0001091.1_g370.1.mk	ubiquitin-like-specific protease 1A	-0.560014	-3.50527	-2.52882	2.02098	1.09806	0.713847	0.193102	0.566035	-0.23608	-1.00183	0.464734	-0.297165	0.000305789	3.06057	1.88588	1.51918
	pseudo24	1057344	1057807	138	Pav_sc0006395.1_g010.1.br	Unknown	-5.88132	-4.03286	-3.47784	-6.27257	-2.2533	1.7243	-0.865864	1.55532	-0.202112	-1.47191	-5.43787	-2.13173	0.000177864	4.39346	4.6984	1.8661
	pseudo25	1081028	1081594	138	Pav_sc0010327.1_g050.1.br	uncharacterized protein LOC103326461	-0.93268	-3.88789	-2.00886	-0.843254	-1.7678	-0.688899	-1.53489	0.944086	1.45877	0.377428	0.514923	2.01404	0.000151164	0.808862	2.57876	3.01023
	pseudo11	7798275	7798863	137	Pav_sc0000752.1_g030.1.br	Unknown	-2.94634	-4.70325	-5.5469	-5.48752	-1.16556	0.572134	0.762074	0.840373	0.908533	-5.22396	-0.0241791	2.34573	0.000195303	3.36665	4.82282	5.00685
	pseudo14	7263008	7263663	137	Pav_sc0001105.1_g290.1.br	Unknown	-3.28555	-3.31271	-3.32306	-4.3453	2.06975	-0.455502	1.90496	1.08625	2.66612	1.04799	0.630369	1.33178	0.000505075	4.03722	5.33269	4.33859
	pseudo19	3859654	3860088	137	Pav_sc0002055.1_g050.1.mk	U-box domain-containing protein 21-like	0.409104	-1.91648	-2.54064	0.73384	-1.73247	2.50005	0.811098	1.87638	0.289005	3.52759	0.0623147	1.24241	0.000262256	2.11062	1.91353	3.08196
	pseudo2	9934573	9935156	136	Pav_sc0000095.1_g960.1.mk	bystin	-2.20554	-2.62527	-3.28096	-0.968233	-0.611709	1.69699	0.584009	1.0332	-0.00504626	1.23406	-0.687854	-1.10241	0.000354586	3.19367	3.23697	2.83552
	pseudo6	9118285	9118804	136	Pav_sc0000363.1_g810.1.br	Unknown	-1.89477	-2.76802	-1.9852	-1.04712	1.62605	-1.59771	-1.83085	-0.227396	2.7475	1.88279	-2.7784	-3.0301	9.37358e-05	2.54528	3.55427	2.5655
	pseudo8	2080702	2081091	136	Pav_sc0000480.1_g780.1.br	Unknown	-2.96613	-4.97236	-3.92117	-1.57026	-0.979923	-1.13533	-0.750999	-1.01138	-1.50797	-0.571046	1.8795	-0.121652	6.91189e-07	2.52405	2.67461	4.54494
	pseudo3	1109785	1110461	134	Pav_sc0000102.1_g250.1.mk	probable LRR receptor-like serine/threonine-protein kinase At4g36180	-2.50312	-5.55157	-4.60232	-3.93497	0.554296	0.757815	-0.276547	0.388412	1.18638	-3.96038	-0.650066	0.807214	0.000218665	3.75481	4.2065	3.35918
	pseudo17	7151974	7152552	133	Pav_sc0001580.1_g410.1.br	Unknown	-3.54911	-2.52097	-4.64401	-5.36793	-3.30006	1.55894	0.675224	-2.13893	-2.90105	-1.06536	-4.32641	1.0446	0.000282491	3.35787	2.70785	3.11186
	pseudo17	2396440	2396873	133	Pav_sc0001498.1_g100.1.br	protein NLP7-like	-2.08914	-3.79996	-4.78355	-0.631269	-3.30373	1.21738	1.20875	-2.47515	-3.75346	1.44281	-1.08309	0.771557	0.000174664	3.16243	2.90236	3.83528
	pseudo23	5555999	5556300	133	Pav_sc0005248.1_g030.1.br	Unknown	0.712598	-2.75928	0.0834863	0.365162	3.49117	3.78964	1.63016	3.48892	3.75899	2.91731	3.92971	3.89026	4.15795e-05	3.21143	3.29123	3.72454
	pseudo7	6972697	6973036	133	Pav_sc0000422.1_g060.1.br	B3 domain-containing transcription factor VRN1-like	-2.81306	-1.1259	-2.02464	1.23004	1.29736	2.54776	2.40057	-0.0747015	0.077527	1.80109	-0.166205	1.18076	0.000697808	3.65368	3.1057	2.97263
	pseudo9	9975341	9975590	133	Pav_sc0000595.1_g1020.1.br	zinc finger BED domain-containing protein RICESLEEPER 2-like	-1.47083	-1.45652	1.53345	-1.01376	3.58071	2.84125	1.83496	0.845324	4.60261	2.55277	2.48737	3.71574	3.39414e-05	2.43876	3.03447	2.76544
	pseudo5	9317176	9317816	132	Pav_sc0000274.1_g470.1.mk	nucleolar protein 10-like	-1.79081	-3.96424	-3.10123	-1.78591	-0.422208	0.476119	-0.0324979	-4.08073	1.48929	-1.27698	1.34823	0.280333	4.52583e-05	2.3698	3.0332	3.1516
	pseudo8	10125028	10125611	132	Pav_sc0000544.1_g450.1.mk	60S ribosomal protein L30-like	-0.00114721	-1.23823	-0.538099	3.12201	1.57377	1.56083	3.84746	2.77636	2.84561	3.18325	2.32016	2.94591	0.000436619	2.7927	3.75109	3.36668
	pseudo8	63833	64523	132	Pav_sc0000467.1_g080.1.br	Unknown	-2.27715	-4.34497	-4.06236	0.60324	0.0773775	1.67941	-1.03133	-1.33438	1.14238	-1.93934	-1.89254	-1.60976	0.000730612	4.19526	3.29402	1.44347
	pseudo11	4558923	4559256	131	Pav_sc0000719.1_g310.1.mk	cellulose synthase-like protein E1 isoform X1	-1.00961	-0.574042	-1.43691	0.346805	-1.38408	0.949776	1.9173	2.22445	2.75414	0.0254652	0.777157	-1.31102	7.03366e-05	1.22171	3.30487	1.02744
	pseudo22	8651463	8651900	131	Pav_sc0004074.1_g040.1.mk	systemin receptor SR160	-2.88889	-4.63213	-3.83584	-1.56906	2.48363	0.450983	1.80292	-0.238413	0.249907	-0.0733347	-2.9235	0.322399	1.6343e-05	4.8943	4.49324	3.24896
	pseudo24	9005127	9005502	131	Pav_sc0008840.1_g020.1.br	retinitis pigmentosa 1-like 1 protein	1.00015	1.69702	0.31657	-1.17896	-2.8637	-3.1466	2.02738	0.0250523	-1.22798	1.58195	1.68222	1.30411	8.09132e-08	-3.22895	-0.232798	0.418665
	pseudo4	6111085	6111699	131	Pav_sc0000192.1_g020.1.br	Tag=/pseudo	-1.96235	0.0895562	-2.55075	1.51495	1.08858	1.99414	3.19878	0.929974	2.20162	0.0295029	3.47021	2.33682	9.93699e-05	2.58825	3.39491	3.52397
	pseudo24	3994015	3994983	130	Pav_sc0007159.1_g010.1.br	Unknown	-2.56439	-1.17228	-3.36756	1.85241	0.21717	1.05184	2.15428	-1.38172	-0.779057	-1.06243	-1.48267	0.0522745	0.000218263	3.27018	2.93254	1.40056
	pseudo20	9933657	9934639	129	Pav_sc0002625.1_g120.1.br	Unknown	0.841823	-0.770066	0.0898085	-3.70879	-2.93943	-3.33664	-0.646465	0.950911	-1.01219	-0.705889	-1.30178	-1.13898	0.000859007	-3.49286	-0.166466	-1.2251
	pseudo3	2808477	2808984	129	Pav_sc0000105.1_g280.1.br	hypothetical protein PRUPE_ppa019800mg	1.36467	0.220618	3.08035	0.778562	0.580943	-1.27355	-0.275985	1.71864	0.0985605	-1.58018	-2.38028	-2.3914	3.85893e-12	-1.75071	-1.2335	-4.08838
	pseudo8	9572710	9573310	129	Pav_sc0000540.1_g310.1.br Pav_sc0000540.1_g320.1.mk	Unknown rae1-like protein At1g80670	-3.8871	-1.1767	-2.46295	-5.67636	2.10289	0.912859	-1.02447	-0.192881	-0.165982	1.5298	2.55466	-2.45976	5.38855e-05	3.16437	1.70746	3.69357
	pseudo4	4009461	4009707	128	Pav_sc0000174.1_g1850.1.br	major allergen Pru ar 1-like	-0.741428	-5.62251	-5.34484	-5.14469	-0.330775	0.272005	1.7855	-5.58443	2.50829	2.26483	1.7696	3.06027	-2.77986e-12	1.65909	3.83198	4.68635
	pseudo7	6796490	6796995	128	Pav_sc0000418.1_g350.1.mk Pav_sc0000418.1_g370.1.br	cysteine-rich receptor-like protein kinase 10 Unknown	-2.26695	-3.24881	-4.11504	0.415305	0.121448	1.16698	1.33373	0.206492	-2.02988	1.3464	0.124914	-1.08802	0.000578097	3.6542	3.40235	3.46866
	pseudo9	3087182	3087961	128	Pav_sc0000557.1_g640.1.br	putative protein TPRXL	-4.15377	-2.27487	-2.80002	-1.12079	-0.169682	0.588187	2.22174	1.42179	0.059029	-0.593078	-0.77327	-0.885884	0.000351559	2.81113	4.36693	2.13833
	pseudo15	8784472	8785377	127	Pav_sc0001267.1_g080.1.br	Unknown	-2.16189	-4.03108	-3.48475	1.06272	0.787637	1.62834	-0.963041	-0.649719	1.61369	0.333358	0.192445	-0.70198	0.00079353	4.20704	3.49311	3.01234
	pseudo15	4252376	4252843	127	Pav_sc0001196.1_g2130.1.mk	uncharacterized GTP-binding protein At5g64813	1.22536	1.33112	-2.09895	0.724783	0.64844	0.222725	-1.76524	-2.55296	-2.86956	0.109393	-0.760493	-0.206506	0.00173636	-0.213715	-3.08055	-1.00458
	pseudo22	6053039	6053369	127	Pav_sc0003802.1_g090.1.br Pav_sc0003802.1_g100.1.br	UPF0481 protein At3g47200-like Unknown	-3.35632	-4.52225	-1.41513	-3.17023	2.38906	-1.37689	2.29338	-1.76235	0.693268	-0.67476	1.22887	3.31029	1.76766e-05	3.47379	3.72262	4.64234
	pseudo3	9180302	9180851	127	Pav_sc0000136.1_g200.1.br	disease resistance protein RPM1-like	-2.01938	-2.88897	-2.70718	0.16794	1.50526	1.51073	2.02107	0.48123	2.82216	1.23292	2.06372	1.59455	2.11302e-05	3.67097	4.54991	4.1586
	pseudo3	5475790	5476048	127	Pav_sc0000119.1_g550.1.br	Unknown	-6.32893	-6.33941	-6.36968	-6.34404	2.47046	-2.38021	-2.62716	-2.22517	3.34109	-0.267245	1.69435	-4.44495	-3.50841e-12	7.28365	8.15456	6.80118
	pseudo6	4493522	4494066	127	Pav_sc0000334.1_g780.1.br	LOB domain-containing protein 16-like	-1.36084	-3.2783	-4.29992	1.59846	-0.431675	-1.55782	1.56275	0.835883	-0.50691	0.179888	1.49157	2.20515	0.000259041	2.91934	3.32481	3.97739
	pseudo11	5267223	5267766	126	Pav_sc0000728.1_g030.1.br	uncharacterized protein LOC103963587	-0.747785	-2.77785	-1.66034	-1.50269	1.06257	1.98266	1.45011	2.68269	3.26519	1.57921	0.995485	2.14739	0.000502488	2.59574	4.14922	3.15359
	pseudo17	9850442	9850712	126	Pav_sc0001661.1_g030.1.mk	uncharacterized protein LOC103322506 isoform X2	-1.84139	0.563158	-1.11429	2.6597	2.89113	2.02672	3.16936	2.63234	3.14232	2.91456	3.00746	2.10419	3.37497e-10	3.00523	3.43697	3.16375
	pseudo22	3738450	3738734	126	Pav_sc0003614.1_g030.1.br	Unknown	-2.55278	-4.22636	-3.15975	-4.84047	-0.20759	0.195488	-1.11004	2.76426	2.97895	0.780758	-1.15396	0.878288	1.40294e-08	2.60735	5.49498	3.57657
	pseudo23	10221788	10222279	126	Pav_sc0006098.1_g010.1.mk	stAR-related lipid transfer protein 7, mitochondrial-like	-0.873472	-3.20909	-2.23895	0.411233	-1.44986	-1.09527	1.81546	0.996515	2.79536	1.01167	-1.88408	1.39256	0.000299955	1.32153	3.84676	2.50437
	pseudo5	276740	277390	126	Pav_sc0000216.1_g590.1.br	Unknown	-3.09877	-2.75659	-3.19817	-3.93133	-2.11895	1.66786	0.285072	-2.01896	2.29954	-0.580551	-2.93796	2.23358	0.000333701	3.21647	4.09562	3.88021
	pseudo11	6043689	6044009	125	Pav_sc0000736.1_g290.1.br	hypothetical protein AALP_AA7G170100	2.00478	0.116243	2.68401	-2.47566	-1.61517	-3.37857	2.75289	-0.551503	-0.66909	0.67758	-0.149664	3.09945	8.87684e-06	-4.25781	-0.517195	-0.0576938
	pseudo12	8119372	8119676	125	Pav_sc0000862.1_g010.1.mk	DNA repair protein RAD51 homolog 4	-2.84089	-3.80461	-0.985106	-1.58195	0.563601	0.283134	2.05749	-4.20357	-4.07492	0.289093	2.73921	2.78683	0.000101274	2.08006	2.57764	4.36884
	pseudo3	1467411	1468085	125	Pav_sc0000102.1_g800.1.br	LOW QUALITY PROTEIN: putative ripening-related protein 5	-3.52257	-4.46659	-3.18851	0.684867	1.61436	-2.08492	-0.636512	-1.1878	-1.17447	-0.300844	-2.54744	-0.731411	0.000143421	4.34157	2.65639	2.71193
	pseudo11	10560094	10560719	124	Pav_sc0000772.1_g090.1.br	hypothetical protein PRUPE_ppa022074mg, partial	-3.10693	-2.52576	-2.95217	-1.33952	0.22036	0.0646098	0.454158	0.418875	1.49472	-0.214415	0.173401	1.40113	0.000144019	2.63704	3.72118	3.46644
	pseudo14	7304462	7305154	124	Pav_sc0001105.1_g370.1.br	Unknown	-1.17128	-3.77592	-3.73163	-0.21666	2.4429	0.150216	0.457603	-1.4573	-1.24971	-1.85614	0.584882	-1.33498	0.0012768	3.6446	1.86526	1.87496
	pseudo15	9086614	9086855	124	Pav_sc0001270.1_g100.1.br	Unknown	-3.67042	-2.98025	-3.34933	-5.50316	1.96473	0.929236	0.120606	2.98805	3.61774	-1.84307	-0.93392	1.52465	3.26494e-05	4.26421	6.13336	3.60024
	pseudo2	8821909	8822339	124	Pav_sc0000094.1_g110.1.mk Pav_sc0000094.1_g120.1.br	Unknown 60S ribosomal protein L12	-1.98966	-0.866639	-1.88338	2.1688	-0.789837	1.23302	0.0860489	-0.139015	0.989997	-0.269967	0.00912668	2.88135	0.00030084	2.79316	1.88464	3.10295
	pseudo5	6190493	6190934	124	Pav_sc0000255.1_g030.1.br	Unknown	-0.656222	-2.90655	-3.56203	0.246717	-0.105636	1.58254	-0.655567	1.6767	1.77324	-2.29576	-0.442126	1.32531	0.000290802	2.58367	3.08809	2.01486
	pseudo11	9715167	9715638	123	Pav_sc0000762.1_g410.1.br	Tag=/pseudo	-1.23355	-4.84655	-1.14948	-0.151467	2.215	2.20529	0.0125805	-0.524004	-1.93273	-1.39733	0.167354	-0.174342	5.42921e-08	3.47887	1.11013	1.39106
	pseudo13	5175129	5175614	123	Pav_sc0000941.1_g010.1.mk	ankyrin repeat-containing protein At3g12360-like	-1.70269	-3.46094	-3.68403	-0.882153	-0.13665	2.14489	0.372263	-1.66694	1.33926	-3.5054	-1.10881	-0.291134	0.00190497	3.62602	3.12095	1.5246
	pseudo18	4933975	4934240	123	Pav_sc0001797.1_g110.1.br	putative fasciclin-like arabinogalactan protein 20	-0.416189	-0.610257	-3.41315	-3.11905	0.719204	-0.0569384	-0.157247	-3.38672	3.69295	2.3947	1.84129	-2.73219	0.000141745	0.861646	3.21623	2.58534
	pseudo10	4363908	4364637	122	Pav_sc0000631.1_g090.1.mk Pav_sc0000631.1_g100.1.mk	pectinesterase 2 cysteine-rich repeat secretory protein 15-like	1.24907	-1.56969	-0.260087	-1.17183	1.13333	-0.301157	1.31465	-0.743497	0.814777	-2.32826	-2.95377	-3.66305	0.00223888	-0.0411133	0.448787	-3.12375
	pseudo13	965216	966259	122	Pav_sc0000890.1_g180.1.br Pav_sc0000890.1_g190.1.br	L-type lectin-domain containing receptor kinase IX.1-like L-type lectin-domain containing receptor kinase IX.1-like	-1.62367	-3.45143	-4.12391	-0.296362	0.846316	0.961016	-0.989074	-2.00466	-1.35635	-1.72133	-1.4854	-0.727487	0.00268816	3.26791	1.27277	1.41765
	pseudo13	5481765	5482068	122	Pav_sc0000967.1_g030.1.br	Unknown	-0.984308	-1.76959	0.664323	0.981857	3.5226	2.86899	2.47002	0.896875	2.6108	-0.858169	0.784181	-1.54277	0.000351204	3.1235	2.50293	0.134777
	pseudo16	10061709	10062204	122	Pav_sc0001428.1_g480.1.mk Pav_sc0001428.1_g490.1.mk	hypothetical protein L484_023252 hypothetical protein PRUPE_ppa021585mg	-2.1869	-4.44093	-1.10663	-3.83552	-1.14264	0.423745	1.26222	-3.61319	0.914859	1.83135	0.629979	2.49762	0.00015258	1.35265	2.58018	3.88072
	pseudo23	2850519	2850860	122	Pav_sc0004766.1_g110.1.br	Unknown	-3.77876	-4.74004	-1.32776	-0.445397	2.38399	0.013794	1.61711	2.54063	3.45437	2.67518	0.836838	2.00146	2.8888e-05	3.77508	5.2861	4.58134
	pseudo25	2700852	2701441	122	Pav_sc0011080.1_g010.1.br	Unknown	0.50895	-3.99719	-4.33646	-4.4702	-0.546214	-1.73995	2.33385	1.43503	2.45034	0.588665	1.32133	-0.921534	0.000729225	-0.576686	3.10528	1.56139
	pseudo7	10573520	10574031	122	Pav_sc0000465.1_g1010.1.br	uncharacterized protein LOC103329745	-2.58942	-0.323476	-1.23995	1.53493	1.17084	-0.736777	0.922967	0.568563	-2.02123	2.34402	1.27225	2.00001	0.00176926	2.04966	1.38442	3.04891
	pseudo11	10792072	10792615	121	Pav_sc0000774.1_g010.1.br	Unknown	-5.08139	-2.5634	-4.36608	-1.09333	-0.861841	-4.78047	-2.14346	-1.04833	2.02087	0.783394	-4.72339	2.55061	1.88384e-06	2.09389	4.26965	4.9456
	pseudo19	7935011	7935665	121	Pav_sc0002207.1_g360.1.mk	polyadenylate-binding protein-interacting protein 3-like	-2.82374	-2.62354	-2.99243	-0.0764086	0.614239	0.31817	0.505095	-1.71737	0.258229	-1.44152	-0.655223	-1.04868	0.00180165	3.11797	2.76601	1.79236
	pseudo21	10478468	10479047	121	Pav_sc0003204.1_g020.1.mk Pav_sc0003204.1_g030.1.br	hypothetical protein PRUPE_ppa015097mg uncharacterized protein LOC103320902	-1.64916	-3.2025	-2.24189	1.7579	0.218993	-0.784265	0.805951	-4.49787	-3.5264	-1.74604	-1.09386	-2.7063	4.5076e-05	3.00442	1.55664	0.52588
	pseudo24	9380111	9380699	121	Pav_sc0008990.1_g010.1.br	Unknown	-3.29444	-2.23047	-2.0091	-1.74987	-0.195897	1.10062	1.70135	-1.30648	0.764679	-4.31414	-0.274826	-0.430104	4.40702e-06	2.55659	3.24864	1.52279
	pseudo9	8353224	8353802	121	Pav_sc0000588.1_g080.1.mk	probable sodium-coupled neutral amino acid transporter 6	-2.71741	-2.32724	-3.79097	0.14795	0.3537	0.289731	0.145162	-2.69445	-3.81229	0.855168	0.419348	0.546228	3.21803e-05	3.09067	1.65246	3.44306
	pseudo15	9271646	9272207	120	Pav_sc0001271.1_g010.1.mk	hypothetical protein L484_004430	0.742287	1.50248	2.49208	-2.97897	-0.854591	-1.50784	-1.9565	-0.828054	2.0552	-1.73339	-2.96259	-1.52812	0.00126253	-3.29611	-1.02559	-3.70717
	pseudo5	3851210	3851479	120	Pav_sc0000240.1_g250.1.br	Unknown	-4.74809	-4.21217	-3.90336	-1.65897	1.08302	-0.19947	1.28479	1.90442	2.23992	-3.99164	1.59848	2.25836	-4.37613e-11	4.38714	6.10881	5.63944
	pseudo1	1766789	1767336	119	Pav_sc0000009.1_g740.1.mk	Unknown	-2.52888	-2.63128	-2.27715	0.752868	0.779509	-0.066048	-1.42299	-2.02487	0.403978	0.015041	-0.70465	-0.518766	0.000301606	3.00967	1.84376	2.10175
	pseudo13	247488	247758	119	Pav_sc0000886.1_g020.1.mk	GMP synthase	-2.37029	-4.84147	-4.19967	-4.27861	-4.46937	1.79831	1.9564	-3.99332	0.706319	-4.06992	0.391072	3.15106	1.39884e-07	3.66047	4.30167	5.18073
	pseudo18	8123195	8123692	119	Pav_sc0001861.1_g100.1.br	LOW QUALITY PROTEIN: DEAD-box ATP-dependent RNA helicase 2-like	-2.403	-2.4384	-0.621289	-2.49653	-2.33023	2.92224	-0.841595	0.372661	2.65769	0.40854	2.05866	2.54947	0.00014615	2.95837	2.99537	3.47059
	pseudo22	7563940	7564506	119	Pav_sc0003928.1_g040.1.br	Unknown	0.926351	-1.95356	1.60673	-2.25795	-4.62888	-1.17023	-1.03067	0.107811	-1.35657	-3.82151	-1.90454	-3.23192	0.000337766	-2.90702	-1.41062	-3.55018
	pseudo3	3690281	3691277	119	Pav_sc0000108.1_g530.1.mk	syntaxin-22-like	-3.4977	-2.42202	-1.70165	-0.832837	0.894647	0.760952	-1.79329	2.26207	2.36624	0.570762	0.0348439	1.62985	0.00136379	2.82049	4.13585	3.26613
	pseudo5	7622620	7623014	119	Pav_sc0000260.1_g100.1.mk	F-box/kelch-repeat protein At3g06240-like	-3.02852	-3.8395	-2.48837	0.0746877	2.2562	2.90485	1.19475	1.58876	2.23993	0.675441	2.53881	2.11079	9.97042e-05	5.16751	4.75692	4.98383
	pseudo12	4802893	4803650	118	Pav_sc0000830.1_g420.1.mk	nuclear cap-binding protein subunit 1	-2.29604	-2.45986	-2.53128	0.325028	1.19325	1.02272	1.13347	-0.914385	0.303699	0.375803	0.495651	1.14826	-8.45457e-13	3.31867	2.82574	3.14053
	pseudo16	4853235	4853452	118	Pav_sc0001341.1_g570.1.mk	hypothetical protein L484_021946	-1.8603	-4.55776	-1.86229	-0.180096	-2.27142	2.36228	-1.54301	-0.42381	-3.19733	0.572259	2.83871	-1.49817	8.83673e-06	3.3937	1.01429	3.92317
	pseudo18	7587049	7587406	118	Pav_sc0001843.1_g010.1.br	hypothetical protein VIGAN_10074600, partial	-2.07799	-1.02263	-3.26832	-0.756306	1.80539	2.06447	2.42369	-0.849006	-2.23407	1.7949	0.583517	1.5197	0.000188765	3.31177	2.8805	3.23394
	pseudo18	8978282	8978550	118	Pav_sc0001869.1_g1110.1.br	Unknown	-3.14509	-1.68224	-0.835897	-3.73103	-2.40319	2.41645	0.74146	1.92569	3.50232	2.72807	0.476037	3.84137	3.25525e-05	2.50817	4.09263	4.50423
	pseudo18	9380210	9380489	118	Pav_sc0001877.1_g600.1.br	Unknown	-1.18935	1.23105	-1.16713	1.59598	1.73296	3.10227	2.16378	2.91079	1.73523	3.23258	3.48858	2.83013	0.00098445	2.20854	2.24627	3.10159
	pseudo25	4823118	4823379	118	Pav_co3990267.1_g010.1.br	Unknown	-1.13879	-1.39159	-1.32564	0.0265007	2.43309	1.96658	3.09378	1.85518	3.81225	0.220777	-1.36144	3.42634	0.000356095	3.06477	4.40801	3.31755
	pseudo7	4174576	4175041	118	Pav_sc0000403.1_g380.1.mk	multiple C2 and transmembrane domain-containing protein 1 isoform X1	-1.49717	-1.5397	-1.32362	-2.77045	0.324372	0.000749643	1.70735	1.00606	1.8148	1.76901	-2.8777	1.89571	0.000145694	1.12802	3.00168	2.7265
	pseudo7	5335779	5336424	118	Pav_sc0000410.1_g380.1.br	Tag=/pseudo	-1.2928	-2.43293	-3.04562	1.27054	1.12728	-0.157494	-0.303354	0.385744	-0.307984	1.48723	-1.24369	2.56664	3.0608e-06	2.94283	2.03336	3.67887
	pseudo1	6941584	6942131	117	Pav_sc0000030.1_g1420.1.mk	kynurenine--oxoglutarate transaminase	-2.15186	-3.48725	-5.48933	-2.10204	-3.33026	1.55245	0.353728	-2.73477	-1.26509	2.10264	0.59267	-0.689556	0.00212492	3.27881	2.45447	4.25476
	pseudo1	1599878	1600304	117	Pav_sc0000009.1_g380.1.br	Unknown	-0.986902	-1.23687	-2.13576	1.07139	1.12874	2.97105	3.08146	1.94299	3.30759	0.857653	1.98145	2.20833	0.000140092	3.39077	4.26355	3.16643
	pseudo11	6226135	6226632	117	Pav_sc0000738.1_g130.1.mk	autophagy-related protein 8C-like	1.32263	2.2556	1.94502	0.138832	0.140967	1.04125	0.718865	2.10396	-0.30843	-2.99553	-1.56975	-0.275209	6.70255e-13	-1.38457	-0.720608	-3.1102
	pseudo11	3145717	3145949	117	Pav_sc0000704.1_g1000.1.br Pav_sc0000704.1_g1010.1.mk	Unknown hypothetical protein PRUPE_ppa002037mg	-5.64868	-2.0212	-5.20063	-4.09229	2.49906	-4.68239	-2.9426	1.97479	2.33525	1.91826	0.341632	3.21645	2.16124e-05	4.29242	4.95567	5.61082
	pseudo12	8499583	8499866	117	Pav_sc0000863.1_g200.1.br	Unknown	-1.15775	-1.25895	-0.0870767	1.57212	-0.0607569	2.58641	0.378353	2.67958	2.84988	0.67683	2.20223	0.351068	0.000612279	2.459	3.0448	2.04829
	pseudo12	9074148	9074809	117	Pav_sc0000866.1_g300.1.mk	uncharacterized aarF domain-containing protein kinase At1g71810, chloroplastic	-3.10365	-3.26794	-3.42186	1.60958	-0.856893	-1.21675	1.59277	-1.80289	-1.21006	1.17428	-0.130162	0.441395	0.000216496	3.68589	3.57482	3.85268
	pseudo16	6922944	6923537	117	Pav_sc0001394.1_g020.1.br	Unknown	-3.04853	-3.30753	-2.56313	-1.61261	-2.24894	1.73942	2.00164	1.87702	0.901146	-2.97511	-3.64264	0.228788	0.000195201	3.30919	4.60927	1.8182
	pseudo2	716829	717091	117	Pav_sc0000052.1_g470.1.mk	extensin-2-like	-5.40578	-5.50895	-5.49101	-4.80337	3.15134	2.22072	2.49061	-5.66311	0.586008	0.528898	3.39353	0.800373	2.02774e-05	7.64652	6.71903	7.6583
	pseudo4	8789715	8789917	117	Pav_sc0000207.1_g310.1.mk	uncharacterized protein LOC103323870	-1.26632	-1.28716	-1.12213	2.39808	2.15359	1.1659	1.68516	1.96053	1.3977	0.840935	1.34914	-0.470243	1.84826e-06	3.21899	2.92266	1.97768
	pseudo10	203604	203886	116	Pav_sc0000600.1_g340.1.br	Unknown	0.998627	0.42695	0.517119	3.23288	3.68903	3.65865	1.85963	3.21619	5.09378	3.1443	4.92417	4.01953	0.000260507	2.87123	3.30171	3.53729
	pseudo10	1212444	1212711	116	Pav_sc0000616.1_g330.1.br	Unknown	-3.28052	-2.87996	-2.80122	-0.0278248	2.10012	2.29434	1.5719	2.25262	0.0539038	0.893096	-1.64353	3.41365	0.00012652	4.73427	4.52115	5.06937
	pseudo13	8392301	8392782	116	Pav_sc0000998.1_g400.1.br	UPF0503 protein At3g09070, chloroplastic	-1.37482	-2.03345	-1.03843	0.239596	1.66888	2.65729	2.54454	-0.696337	1.5718	2.78621	-0.157953	-0.525405	0.00112952	3.25605	3.07707	2.92635
	pseudo15	1261302	1261925	116	Pav_sc0001171.1_g410.1.mk	Unknown	-0.761417	-3.36755	-1.15005	0.189771	1.18168	0.822922	-0.55919	0.0868587	-2.22272	1.68617	0.521917	2.74306	0.000100553	2.18663	0.781394	3.31871
	pseudo11	5634027	5634271	115	Pav_sc0000732.1_g100.1.br	hypothetical protein PRUPE_ppb015759mg, partial	-5.57342	-5.70399	-1.95394	-0.231534	-0.212075	0.230418	-3.74596	-0.470518	1.51585	2.42309	3.12179	1.97581	1.3577e-12	3.27536	3.61542	5.91523
	pseudo13	2004002	2004481	115	Pav_sc0000893.1_g530.1.br	Unknown	-3.92717	-4.84909	-2.2297	-3.62053	-4.60073	-0.707938	-3.88605	-3.32421	-4.336	-0.202183	-1.10236	2.71375	0.00123824	1.22809	-0.531436	4.65382
	pseudo17	10354337	10355150	115	Pav_sc0001673.1_g340.1.mk	hypothetical protein SETIT_015228mg, partial	-2.57374	-4.98596	-3.99882	-2.08571	-3.06111	0.987031	0.388089	-0.262252	-1.57776	0.654868	-1.09157	-1.35106	1.43246e-08	3.15691	3.2408	3.2163
	pseudo2	8501415	8501796	115	Pav_sc0000093.1_g170.1.mk	organ-specific protein S2-like	-1.56633	-5.5214	-2.26087	0.610156	0.677167	1.96034	-0.0333674	0.112808	-1.16884	-1.7491	0.797095	-0.130329	0.000178115	3.62667	2.13963	2.37591
	pseudo23	3008129	3008420	115	Pav_sc0004820.1_g010.1.br	DNA-directed RNA polymerases II and V subunit 8A-like	-4.16027	-3.35683	-4.15151	-1.21568	-0.972538	2.11212	-1.625	-3.0765	1.77523	1.07616	1.34373	1.97305	9.25505e-05	4.64887	4.20358	5.35257
	pseudo9	10210981	10211361	115	Pav_sc0000597.1_g070.1.mk	cysteine-rich repeat secretory protein 38-like	-0.331699	-2.20583	-0.76022	0.2461	1.15941	1.15507	2.58123	0.521682	3.07902	0.012057	1.54826	2.8175	3.00323e-05	1.81772	3.30861	2.77746
	pseudo13	2698205	2698726	114	Pav_sc0000907.1_g100.1.br	uncharacterized protein LOC103320019	-1.79782	-3.05331	-3.29834	-0.0201225	-1.3632	0.820323	2.59927	0.682228	2.1023	0.4806	-0.924727	0.793199	0.00075603	2.62329	4.55216	2.84209
	pseudo14	10085309	10085740	114	Pav_sc0001126.1_g330.1.mk Pav_sc0001126.1_g340.1.mk	probable E3 ubiquitin ligase SUD1 filament-like plant protein 7	-2.96513	-2.56649	-2.77047	-1.37412	-0.55025	1.98525	0.828169	0.496579	0.920952	1.86748	0.812503	0.875835	0.00109811	3.50321	3.51796	4.02927
	pseudo24	3495775	3496419	114	Pav_sc0006999.1_g020.1.mk	hypothetical protein PRUPE_ppa027095mg, partial	-0.990236	-3.41539	-3.16533	2.81863	1.23487	-0.239676	2.01576	0.375015	-0.811135	-0.216678	-2.30175	1.04546	0.000842244	3.85531	3.06031	2.14194
	pseudo4	1550229	1550478	114	Pav_sc0000157.1_g710.1.br	tyrosine-protein phosphatase non-receptor type 23-like	-0.973261	-2.29058	-2.88616	1.8839	2.23732	3.02498	2.19721	1.12679	2.56477	0.0175911	-0.0753049	2.40084	8.84233e-06	4.28453	3.90134	3.09264
	pseudo10	8452407	8452904	113	Pav_sc0000663.1_g440.1.br	UPF0481 protein At3g47200-like	-0.647046	-1.32056	-1.47287	1.78077	1.51353	1.31015	2.79291	2.8095	-0.311691	-0.560528	0.545122	2.12429	0.000732209	2.64808	3.39766	2.21516
	pseudo13	6117522	6117873	113	Pav_sc0000976.1_g270.1.mk	Unknown	-2.58765	-2.61204	-0.29485	-2.41091	1.84038	2.55543	-0.425206	-0.18278	0.253124	1.14536	0.811752	-1.71593	0.000169333	3.07471	1.29898	1.89938
	pseudo17	10960229	10960712	113	Pav_sc0001697.1_g040.1.br	hypothetical protein PRUPE_ppa027215mg	-2.05726	-2.10785	-1.91897	-1.3662	1.2508	1.77349	0.651479	1.08709	2.16179	-0.574318	-0.850183	-0.0766593	0.000621227	3.06995	3.47116	1.56157
	pseudo6	4477291	4477586	113	Pav_sc0000334.1_g740.1.mk	Unknown	-1.73482	-1.95481	-1.15517	-3.96458	-2.82094	-1.92402	1.16429	0.304527	3.27148	-0.0915042	-1.71101	-0.901263	8.71335e-05	-1.10272	3.70442	0.82074
	pseudo6	888511	888846	113	Pav_sc0000308.1_g020.1.br	Tag=/pseudo	-5.65413	-5.89954	-5.77432	-1.10201	-0.715627	1.85825	-0.641726	-1.1264	3.61762	3.53346	-0.602094	3.12764	3.5392e-06	6.42037	7.92889	8.57836
	pseudo8	1528864	1529099	113	Pav_sc0000479.1_g010.1.mk	beta-galactosidase 10	-0.265277	-0.479217	-0.884237	1.12028	1.446	2.36392	2.32972	1.02618	1.16642	2.10993	2.90203	2.32986	0.000320852	2.26424	2.15419	3.00771
	pseudo9	8604975	8605561	113	Pav_sc0000588.1_g490.1.br	protein FAR1-RELATED SEQUENCE 5-like	-2.78031	-4.16904	-3.13657	-0.193086	-0.613181	0.0456904	-0.503657	-0.731268	0.940822	1.27365	-0.702334	0.764809	2.54015e-05	3.02373	3.35755	3.9095
	pseudo12	4685514	4685770	112	Pav_sc0000830.1_g360.1.br	Unknown	-0.817292	0.0294993	-0.674853	3.38924	3.32155	3.82657	2.81809	3.14338	4.45683	2.95066	0.795726	2.32223	2.26878e-05	3.96829	4.09515	2.70778
	pseudo17	10532772	10533319	112	Pav_sc0001685.1_g160.1.mk	UDP-D-xylose:L-fucose alpha-1,3-D-xylosyltransferase 1-like	-0.468914	-3.29724	-1.71014	2.40714	0.274503	-0.985581	0.655564	-0.943011	0.884842	2.34217	2.48622	1.63417	0.00014835	2.63508	1.80276	3.60812
	pseudo19	7737624	7738417	112	Pav_sc0002206.1_g410.1.br Pav_sc0002206.1_g420.1.mk	Unknown mitochondrial pyruvate carrier 2-like	1.10057	0.168394	0.00778316	-2.21518	-1.72351	1.29043	-2.7129	-3.61549	-4.12427	-1.74295	-1.22131	-1.80452	0.00129067	-0.527822	-3.87412	-2.0755
	pseudo20	7977244	7977632	112	Pav_sc0002549.1_g070.1.mk	Unknown	-1.63564	-3.66074	-2.86982	-2.41526	-1.5708	2.47242	2.52588	-2.27062	1.60298	0.169343	-1.21651	2.27357	9.76523e-05	3.49773	4.06572	3.57095
	pseudo11	537344	538015	111	Pav_sc0000691.1_g220.1.mk	Unknown	-5.33763	-5.30181	-5.17922	-5.27392	-4.64223	1.37803	-4.09018	-3.92703	1.76252	-5.22402	-2.16966	0.524662	8.94922e-05	5.10047	5.50081	4.4413
	pseudo16	5709710	5710012	110	Pav_sc0001369.1_g010.1.br	Unknown	-2.36637	-3.84651	-0.960092	-0.170422	1.95162	1.49983	0.837204	-1.18037	-1.40443	0.392803	-2.18277	-2.32152	9.56151e-14	3.28624	1.74475	1.15662
	pseudo18	9344059	9344346	110	Pav_sc0001877.1_g570.1.br	hypothetical protein PRUPE_ppb019047mg, partial	-2.20512	-1.64433	-2.21204	-0.872082	-0.556034	3.10997	0.455973	1.99663	0.906623	2.20448	-0.319461	0.803928	5.73934e-05	3.71168	3.26546	3.24927
	pseudo2	7956819	7957079	110	Pav_sc0000091.1_g300.1.mk	uncharacterized protein LOC103322083	-1.53259	-3.28946	-2.01034	-2.46327	-3.01416	-1.73963	0.421429	0.170475	-2.13012	1.11727	1.98228	-1.28082	6.09229e-06	-0.203503	1.95181	3.23008
	pseudo5	3178466	3178919	110	Pav_sc0000231.1_g950.1.mk	protein TRANSPARENT TESTA 12-like	0.614777	-0.343436	-0.812349	2.57202	2.32725	3.48717	2.67957	1.53058	3.05787	3.25352	3.21415	2.25488	0.000267039	2.94054	2.60886	3.02956
	pseudo7	4093147	4093610	110	Pav_sc0000403.1_g130.1.mk	nucleoside diphosphate kinase 1	-1.57137	-2.66845	-3.52115	2.00536	0.195642	-0.0208804	1.1845	-1.46594	0.928271	-0.0588391	-4.3291	0.318072	0.000840433	3.40327	2.96568	1.95773
	pseudo9	6834695	6835638	110	Pav_sc0000583.1_g520.1.mk	LOW QUALITY PROTEIN: myosin-16-like	-1.49617	-4.93579	-2.54312	2.42122	-0.0990302	0.134248	0.294073	-1.83664	-1.35985	-0.115144	-1.97863	-0.663352	0.0028016	3.72483	1.76249	1.6945
	pseudo23	5062138	5062601	109	Pav_sc0005165.1_g030.1.br	Unknown	-2.77389	-3.75707	-4.12793	-1.9099	0.155746	-0.245778	-0.179856	2.56238	-1.14597	-2.13157	1.39499	-1.97919	9.74709e-05	3.00294	4.70642	3.48783
	pseudo10	2927404	2927718	108	Pav_sc0000624.1_g1020.1.br	Unknown	-1.25849	-2.42958	-2.23813	-2.98713	-0.364993	1.35903	1.95051	-0.597592	-2.30603	-1.76927	2.46741	0.904062	0.000358412	2.08812	2.53542	3.23809
	pseudo13	1440207	1440599	108	Pav_sc0000890.1_g1150.1.br	cytochrome P450 82A3-like	-1.25493	0.145863	-1.98584	-0.836394	0.992633	1.32821	2.03397	-0.774514	2.05616	3.13443	1.53895	1.99551	0.000478676	1.5092	2.31368	3.14021
	pseudo15	7909191	7910035	108	Pav_sc0001251.1_g540.1.br	Unknown	-1.20764	-3.54797	-2.97169	-1.7701	1.84054	-1.02567	0.699847	0.570699	1.81044	0.322424	-1.95873	0.57522	0.000576769	2.75675	3.35669	2.2143
	pseudo15	8866671	8867011	108	Pav_sc0001267.1_g220.1.br	palmitoyl-acyl carrier protein thioesterase, chloroplastic-like	0.45926	-1.81179	-2.0687	2.00589	1.49241	3.42339	2.0717	-1.17355	-0.923713	1.15718	1.36705	2.82424	0.000682714	3.20959	1.44684	2.64741
	pseudo18	3749139	3749393	108	Pav_sc0001769.1_g160.1.mk	ras-related protein Rab11D	0.678048	-5.73502	-0.912289	-2.02035	3.02709	3.57007	1.86214	3.93739	4.29558	1.83267	1.76581	3.13157	3.4783e-07	3.23722	4.1659	2.87073
	pseudo22	3860477	3861090	108	Pav_sc0003614.1_g280.1.mk	putative ribonuclease H protein At1g65750	-0.825986	-1.61466	-0.798117	1.1605	0.219332	-0.223411	-0.654303	1.57091	2.43969	1.49855	2.60664	2.34939	0.000964788	1.5379	2.62335	3.25702
	pseudo5	3161530	3161891	108	Pav_sc0000231.1_g930.1.mk	grpE protein homolog, mitochondrial	-0.790947	-1.84635	1.50752	-0.594805	2.33111	3.08007	2.07641	3.35524	4.0784	2.43788	1.39966	2.59492	0.000184539	1.93555	3.08291	1.93022
	pseudo5	7661659	7661988	108	Pav_sc0000260.1_g230.1.br Pav_sc0000260.1_g240.1.mk	uncharacterized protein LOC103344535 replication factor C subunit 3-like	-3.73513	-1.26485	-0.663054	-0.430222	1.61824	2.41299	0.427421	1.13908	-1.48026	-0.528498	-0.598878	1.1114	0.000357269	3.02479	1.79849	1.64608
	pseudo6	5820632	5821019	108	Pav_sc0000350.1_g430.1.br	Unknown	1.39273	2.49572	1.46503	-1.63131	-2.53771	-2.01975	0.76607	1.33818	0.373107	-0.708353	1.80857	-1.87159	5.27706e-05	-3.89417	-0.997167	-1.32926
	pseudo8	6960318	6960621	108	Pav_sc0000503.1_g770.1.mk	uric acid degradation bifunctional protein TTL isoform X1	-2.40169	-2.08043	-0.990911	-1.25545	1.5551	3.26599	0.884813	-0.788933	2.70177	-1.32306	1.84516	1.6015	9.66454e-05	3.80438	3.26536	2.91944
	pseudo9	9941365	9941847	108	Pav_sc0000595.1_g900.1.br	Unknown	-4.25784	-3.7887	-2.45943	-5.7754	-1.98268	1.06458	0.135037	-5.88915	-1.40796	2.4716	-4.45177	-3.29586	6.59592e-05	2.94681	2.28338	4.21575
	pseudo12	9968290	9968794	107	Pav_sc0000877.1_g440.1.br	uncharacterized protein LOC103329348	-2.21346	-2.96814	-3.60309	1.38485	-1.93662	1.28124	-1.21698	0.325203	-3.56955	-0.456456	-1.5405	-1.76345	0.00114189	3.63894	2.05359	1.68319
	pseudo14	8570756	8571106	107	Pav_sc0001111.1_g270.1.mk	hypothetical protein PRUPE_ppa001422mg	-4.13325	-1.74256	-1.37478	0.319844	2.84533	-1.01463	1.05091	0.4788	-0.982068	-0.235222	-0.782309	-0.254889	8.37072e-05	3.59024	2.42135	1.61369
	pseudo16	9556128	9556451	107	Pav_sc0001422.1_g280.1.mk	Unknown	-3.55933	-3.53807	-1.90205	-3.08019	-2.01972	0.669659	-0.271664	-3.29314	-0.879965	0.204495	1.35821	0.924945	2.79717e-10	2.157	1.74893	3.6786
	pseudo17	9349925	9350519	107	Pav_sc0001640.1_g010.1.mk	putative CCA tRNA nucleotidyltransferase 2	-2.78137	-2.8947	-4.79394	1.6534	-1.06628	-1.37906	-0.547633	-1.05497	-1.62744	0.72155	-0.979567	0.515546	0.00024246	3.66496	2.23661	3.50438
	pseudo19	808054	808345	107	Pav_sc0001954.1_g050.1.br	serine/threonine-protein phosphatase 7 long form homolog	-1.64694	-2.30013	-2.75885	2.23805	-1.27552	1.34638	0.5138	-0.453864	2.18554	-0.26965	-2.17488	0.433735	0.000845575	3.51741	3.32318	1.8416
	pseudo2	321030	321486	107	Pav_sc0000051.1_g290.1.mk	EVI5-like protein	-3.02898	-4.14864	-2.77237	-1.61306	-0.274878	1.05096	1.04144	-0.715588	-1.3564	-2.1033	-0.582719	-2.13004	0.000103901	3.30979	3.23283	1.79523
	pseudo2	2578688	2579081	107	Pav_sc0000062.1_g310.1.mk	uncharacterized protein LOC103320274	-2.00406	-4.28305	-3.36449	-4.06304	-2.05469	-1.83861	1.60547	-3.29247	3.03407	-2.27127	-4.0693	3.13509	3.4471e-09	0.544464	4.8329	4.50828
	pseudo7	8886637	8887030	107	Pav_sc0000449.1_g520.1.mk	LOW QUALITY PROTEIN: parafibromin	0.879557	-0.534273	-0.472052	-1.20548	2.50561	1.14309	1.65162	0.597077	-0.187093	-2.87671	-2.73527	-4.20097	2.55546e-05	1.35577	0.767036	-3.25442
	pseudo10	3392839	3393315	106	Pav_sc0000624.1_g1760.1.mk	60S ribosomal protein L4	-4.73509	-5.28001	-5.29796	-1.70231	-4.59785	2.24703	-0.314046	1.07559	1.58481	2.04735	-5.58512	1.78019	0.000114611	5.84411	6.05841	6.41876
	pseudo10	1211400	1212066	106	Pav_sc0000616.1_g320.1.mk Pav_sc0000616.1_g330.1.br	polyadenylate-binding protein RBP45C Unknown	-1.39507	-5.19738	-3.59722	0.0214168	0.669474	1.09679	-1.0274	-2.24706	-0.960658	-1.13656	-2.28147	-0.918772	0.000524756	3.275	1.30986	1.27917
	pseudo13	510341	510770	106	Pav_sc0000886.1_g510.1.br	DNA-(apurinic or apyrimidinic site) lyase 2	-3.08423	-4.8674	-1.44053	-4.70032	-2.46665	1.07554	0.436168	1.09561	0.834504	0.715785	-2.43864	2.10103	0.000220162	2.16016	3.34045	3.55457
	pseudo14	2607286	2607528	106	Pav_sc0001051.1_g500.1.br	Unknown	-3.54715	-4.83261	-3.67056	-1.18912	-3.34254	-0.581728	-4.83221	1.71142	3.5588	-0.690647	-1.07896	2.69829	1.15589e-07	2.59731	6.24383	5.25072
	pseudo21	9680168	9680560	106	Pav_sc0003169.1_g110.1.br	Unknown	-0.737646	-2.82446	-1.81833	-0.710843	2.4888	1.68505	2.34527	-0.466055	-1.47544	-0.8327	0.390708	-0.701622	0.00224754	3.20389	2.5893	1.2798
	pseudo21	1360144	1360613	106	Pav_sc0002772.1_g040.1.mk	protein-tyrosine-phosphatase PTP1 isoform X3	-1.33488	-3.73379	-2.77745	-0.431559	-0.305244	1.63107	-1.51374	-0.0106881	-3.23102	1.83346	0.155073	-0.871883	0.000244313	2.9123	1.23101	3.08074
	pseudo25	5983729	5984089	106	Pav_co4014041.1_g010.1.br	Unknown	-2.7868	-2.07118	-4.19021	1.53814	-1.27338	2.2838	2.00704	-1.4717	-0.048292	2.14637	-1.57516	0.940634	0.000141441	4.22556	3.61093	3.93245
	pseudo1	2985758	2985951	105	Pav_sc0000017.1_g340.1.br	60S ribosomal protein L35-like	0.66582	-1.02306	0.0513095	2.59094	2.82275	2.43255	2.98075	2.45456	3.62356	3.19912	2.19467	3.39074	0.00019896	2.57022	3.04463	2.96082
	pseudo10	9545444	9545894	105	Pav_sc0000675.1_g350.1.mk	proliferating cell nuclear antigen-like	-1.41678	-2.37284	-3.77741	1.16193	1.16076	-0.0397597	0.652661	-0.935347	0.804301	-0.374467	-0.726244	-2.63403	1.52764e-07	3.08787	2.58423	1.26272
	pseudo15	7677563	7677823	105	Pav_sc0001251.1_g090.1.mk	non-specific lipid transfer protein GPI-anchored 2	-1.96279	-5.73596	-4.42348	-1.61804	-1.44253	-1.07143	-0.864428	-2.83179	-5.53044	-2.28066	-0.0154551	1.05341	3.69924e-11	1.86128	1.14397	3.34488
	pseudo19	284501	284720	105	Pav_sc0001936.1_g090.1.br	Unknown	-1.64479	-6.35509	-6.3352	-6.36491	-3.38489	-1.23885	-6.35506	2.25321	-0.99637	-1.48831	2.02756	-1.95316	-5.34575e-13	0.626206	3.93865	3.76802
	pseudo2	814699	815202	105	Pav_sc0000052.1_g700.1.mk	nudix hydrolase 10-like isoform X1	-1.78601	-1.22265	-3.30944	0.799362	-1.2654	0.767402	1.65028	1.96708	-1.29401	-0.43475	0.236132	1.54065	0.000197776	2.23552	3.18598	2.55857
	pseudo2	3681690	3682330	105	Pav_sc0000067.1_g030.1.mk	peroxidase P7-like	-1.84326	-3.32654	-3.00601	-2.11626	-0.726337	0.385459	0.623898	-3.99978	-0.867653	-0.105066	0.425048	1.58695	0.000297618	2.09032	2.09719	3.39138
	pseudo2	7730766	7731539	105	Pav_sc0000089.1_g070.1.mk Pav_sc0000089.1_g080.1.mk	putative F-box protein At3g29830 putative F-box/LRR-repeat protein At1g56400	-0.927338	-2.61377	-3.65401	1.70616	-0.560613	1.23959	-0.547737	-1.42997	-1.98886	0.498196	-2.69295	-0.377995	0.000187839	3.03549	0.76607	1.60403
	pseudo24	9647039	9647237	105	Pav_sc0009122.1_g020.1.br	uncharacterized protein LOC103320250	-0.2817	-2.82152	-1.56996	-2.17324	0.923868	2.68063	1.80183	2.38163	2.66166	2.97452	1.9124	1.3269	2.8679e-05	2.71308	3.52983	3.44148
	pseudo1	3247663	3248476	104	Pav_sc0000017.1_g610.1.mk	uncharacterized protein LOC103322565 isoform X1	-1.3287	-2.12831	-3.009	-1.06516	0.192857	3.23463	1.3638	-1.28747	-0.713675	1.0747	0.0935153	1.84676	4.43211e-05	3.87683	2.25818	3.17216
	pseudo10	732479	732693	104	Pav_sc0000608.1_g080.1.br	uncharacterized protein LOC103343242	-0.403856	0.941697	0.0356606	1.4365	3.30967	1.74439	0.737974	3.06043	3.34027	3.25854	3.25932	3.58133	0.000137541	2.10936	2.44368	3.07139
	pseudo11	2929201	2929499	104	Pav_sc0000704.1_g550.1.mk	mediator of RNA polymerase II transcription subunit 17	-2.37381	-2.60092	-1.41847	0.44017	0.938673	2.77588	2.71181	0.824322	1.3937	1.17578	0.813814	0.910804	8.14801e-05	3.78982	3.90314	3.01033
	pseudo12	5243915	5244525	104	Pav_sc0000832.1_g370.1.mk	Unknown	1.11227	-3.48631	-2.91908	-0.556261	-1.18477	2.91581	-0.215644	-0.656885	3.19746	2.38533	2.82736	3.31305	0.00112248	1.86249	2.16238	3.22349
	pseudo17	3532639	3533211	104	Pav_sc0001513.1_g040.1.br	heat shock cognate protein 80-like	-2.95267	-2.27988	-1.84357	1.91092	-0.216177	-0.355403	1.44579	-1.9601	0.195003	0.279226	0.271707	-0.353796	2.5191e-05	3.13812	2.74905	2.38392
	pseudo18	1046035	1046446	104	Pav_sc0001710.1_g600.1.br	Unknown	0.843568	-1.25599	-0.613359	3.29124	2.70437	3.15879	2.01739	3.12156	3.37619	2.9592	3.0951	3.9155	-4.47756e-13	3.13806	3.01254	3.45376
	pseudo19	8540665	8540850	104	Pav_sc0002208.1_g650.1.mk	Unknown	-1.38106	0.893512	0.277391	-0.343751	2.4774	3.19	2.42625	3.47734	3.91945	2.65232	3.21331	3.12377	0.000130006	2.1645	3.19572	2.81347
	pseudo20	1563358	1563891	104	Pav_sc0002327.1_g280.1.br	cytochrome P450 82A1-like	-0.0842766	0.477963	-0.802496	-2.44456	-3.53951	-0.315812	-1.61525	-4.57341	-0.563379	-4.02038	-4.30482	-4.99253	6.279e-05	-1.43893	-1.47704	-4.34027
	pseudo20	2872819	2873071	104	Pav_sc0002360.1_g140.1.mk	probable protein phosphatase 2C 52	0.00393357	-0.124007	-0.00651032	1.78138	1.67091	3.16557	1.43418	1.30399	1.93764	1.22058	3.40428	3.77777	0.000993741	2.41905	1.62635	3.19126
	pseudo5	8891540	8892244	104	Pav_sc0000271.1_g010.1.mk	uncharacterized protein LOC103344231	-2.44468	-5.63945	-3.15635	-2.31162	-0.708663	-0.16065	-1.55921	0.0447035	-2.0451	0.472796	-1.15179	0.103267	0.000871787	2.43468	2.35227	3.20446
	pseudo6	7993204	7993661	104	Pav_sc0000358.1_g1100.1.br	Unknown	-3.25311	-1.70404	-3.32179	-4.41521	-1.46648	0.716368	-0.998844	1.57417	2.49583	-1.10197	1.96732	-2.99815	0.000170379	2.00316	4.1551	3.13669
	pseudo16	4114848	4115126	103	Pav_sc0001337.1_g020.1.br	Unknown	-1.81014	-2.00716	-3.00829	0.769675	1.01344	2.04651	1.07102	2.5181	3.19539	1.55732	-1.33179	2.79007	0.000142429	3.57693	4.68995	3.96191
	pseudo17	710412	710638	103	Pav_sc0001466.1_g130.1.br	Unknown	0.751898	-1.13628	-1.68966	2.80333	3.78502	2.71932	-0.413193	1.36057	2.1392	1.84577	3.48707	1.77026	6.41756e-06	3.48137	1.65719	2.89517
	pseudo19	8965037	8965294	103	Pav_sc0002231.1_g170.1.br	Unknown	1.79256	-0.0449723	-0.617148	3.35013	0.214995	4.20248	2.29596	3.54043	4.01212	4.40642	3.73674	2.62551	7.97443e-06	2.54933	2.68397	3.00085
	pseudo19	2021208	2021588	103	Pav_sc0001987.1_g040.1.br	uncharacterized protein LOC103322337	1.62823	-3.81	2.46653	0.373997	0.121637	1.96988	1.13665	2.402	-2.0134	-1.69076	-2.77817	-1.98324	5.6538e-05	-0.463678	-0.168523	-3.61656
	pseudo23	3015185	3015576	103	Pav_sc0004820.1_g040.1.br	hypothetical protein PRUPE_ppa023650mg, partial	-2.01178	-3.49351	-3.18157	1.65971	1.3047	-0.0832303	0.435387	-0.33954	-2.42127	1.57142	-1.48806	1.24494	0.000894353	3.87847	2.38162	3.67234
	pseudo7	6178429	6178864	103	Pav_sc0000414.1_g350.1.br	ankyrin repeat-containing protein At5g02620-like	-2.77376	-4.79692	-4.57885	-1.65423	0.889859	-1.42688	-1.6399	-4.8081	0.284677	-1.8179	-0.147701	0.32334	0.000112501	3.5045	2.81326	3.4436
	pseudo8	3654056	3654425	103	Pav_sc0000488.1_g670.1.br	Unknown	-2.19734	-2.66668	-3.61702	-0.473744	1.7304	1.54541	2.07528	1.13115	-0.33001	1.03131	-1.14375	-0.14356	0.000117253	3.92814	3.97766	2.89592
	pseudo10	2977976	2978635	102	Pav_sc0000624.1_g1070.1.mk	lisH domain-containing protein C1711.05 isoform X1	-2.20708	-2.77247	-2.0463	0.612657	-2.05979	0.908107	0.386983	-1.95287	1.6731	2.18085	-0.210532	2.10895	0.00166969	2.59104	2.97435	4.00472
	pseudo13	996896	997827	102	Pav_sc0000890.1_g240.1.mk	phospholipid hydroperoxide glutathione peroxidase 1, chloroplastic	-1.73741	-2.20354	-3.3723	-0.643935	1.15158	1.38096	0.84945	-1.39537	0.7646	-1.49221	-1.34726	0.76147	0.000619975	3.15515	2.66105	1.99376
	pseudo17	963853	964394	102	Pav_sc0001471.1_g070.1.br Pav_sc0001472.1_g010.1.mk	hypothetical protein PRUPE_ppa014803mg, partial unnamed protein product	-1.72471	-0.465149	-1.55477	0.185259	2.91619	1.812	1.11747	0.730048	0.244547	0.147674	0.827	1.85403	0.00076837	3.15706	1.87432	2.24837
	pseudo18	8347722	8348457	102	Pav_sc0001862.1_g310.1.mk Pav_sc0001862.1_g320.1.mk	Unknown fimbrin-like protein 2	-2.57598	-3.60557	-3.926	0.752228	-0.327853	0.0704546	-0.60716	-1.98656	-1.89541	-1.28557	-3.41648	-3.09067	0.00154341	3.48375	1.89949	0.976858
	pseudo25	746021	746254	102	Pav_sc0010196.1_g010.1.br	Unknown	-0.729634	-1.7797	-0.276643	2.47709	-0.770626	2.37977	2.16047	1.99903	3.60871	2.43398	1.9717	2.163	0.000125197	2.72344	3.58701	3.00483
	pseudo4	9290549	9291033	102	Pav_sc0000207.1_g1260.1.mk	purple acid phosphatase 23	0.191299	-3.11289	-1.59864	2.62094	1.87224	2.25683	1.28196	-1.28021	0.571812	1.45946	-2.55027	-1.19979	0.000154225	3.20028	1.44748	1.07997
	pseudo5	9198695	9199002	102	Pav_sc0000274.1_g260.1.br	Unknown	0.252073	2.16681	-2.38616	0.844625	0.0691924	1.47657	2.65956	0.830657	0.130085	-1.36505	-2.91426	-2.86925	0.000145614	-0.0614098	0.646286	-3.15841
	pseudo8	10007970	10008180	102	Pav_sc0000544.1_g290.1.mk	hypothetical protein PRUPE_ppa022932mg, partial	-2.15894	-1.27802	-1.8207	-0.325176	-1.46838	2.08981	2.38504	-0.461311	-0.255901	3.71161	0.425082	0.0118101	5.34587e-14	2.55865	2.88414	4.071
	pseudo9	8018108	8018611	102	Pav_sc0000586.1_g520.1.br	Unknown	-1.46679	0.99087	1.29334	-2.0411	-1.0866	-2.03346	0.548999	-0.702185	-5.0142	-4.03017	-2.20488	-2.77055	0.000336197	-2.32479	-1.18675	-3.4987
	pseudo1	2979191	2979484	101	Pav_sc0000017.1_g330.1.br	Unknown	3.18721	3.01871	1.50107	-1.01221	0.140677	0.796029	-0.927422	-1.56566	-0.10561	0.399881	0.651628	-0.114009	4.38209e-06	-2.58758	-3.48266	-2.39362
	pseudo21	8402913	8403605	101	Pav_sc0003106.1_g030.1.br	hypothetical protein	-3.58895	-3.49633	-4.06256	0.428917	-0.801563	1.13078	0.31816	0.280413	0.555851	0.74804	0.936987	1.30532	1.1787e-09	4.14955	4.08552	4.71112
	pseudo3	5288356	5288557	101	Pav_sc0000119.1_g250.1.br	Unknown	-6.26037	-6.17934	-6.17671	-5.35495	1.5239	2.68053	0.888353	-6.3228	-5.60284	-3.10289	2.22089	0.473711	-3.22412e-12	7.83893	5.53389	7.24453
	pseudo5	1471868	1472263	101	Pav_sc0000220.1_g1290.1.br	zinc finger MYM-type protein 1-like	-3.24697	-2.59938	-3.96901	-0.914347	0.423357	1.36578	-2.2428	-3.15234	-2.99004	-1.5419	1.61571	1.20637	4.67751e-05	3.73463	0.427982	4.09613
	pseudo8	5495842	5496105	101	Pav_sc0000497.1_g190.1.mk	zinc transporter 5	-2.39204	-4.50069	-3.13742	1.66219	-4.09131	-0.419729	-1.38382	-2.75537	-0.686312	2.86378	0.270045	0.320889	2.23487e-10	3.51105	1.72655	4.80453
	pseudo1	4422771	4423520	100	Pav_sc0000024.1_g130.1.mk	bifunctional monodehydroascorbate reductase and carbonic anhydrase nectarin-3-like	-2.31465	-2.37812	-3.47197	-1.61233	-0.89411	1.65421	-0.420203	0.0796954	-2.28465	-0.297484	-0.311006	0.78869	0.000478712	3.05298	2.05516	2.79141
	pseudo1	3160430	3160941	100	Pav_sc0000017.1_g540.1.mk	phytoene desaturase	-1.46035	-2.24175	-3.57622	-0.122023	-1.48858	-0.0126872	2.28223	-0.763665	-1.57908	0.125528	-0.121175	3.00907	8.94794e-05	1.78283	3.13543	3.93304
	pseudo14	3136234	3137121	100	Pav_sc0001059.1_g470.1.mk	hypothetical protein CISIN_1g045338mg	-2.17267	-3.61147	-3.80842	-4.46669	-1.6072	-0.560842	1.63095	-1.88441	-3.11187	-3.12397	-0.696994	-0.350863	0.000510084	1.48734	3.21569	2.01503
	pseudo2	908267	908629	100	Pav_sc0000052.1_g840.1.br	uncharacterized protein LOC103453518	-1.10017	-4.29396	-3.24932	1.52025	0.987893	1.27747	-1.77717	-2.05183	0.563574	-0.728027	1.09408	0.961635	0.000167944	3.54673	1.69143	2.91198
	pseudo20	6663659	6663900	100	Pav_sc0002479.1_g350.1.br	pre-mRNA-splicing factor 38A-like	2.56365	2.57936	2.14791	1.17064	1.00512	1.39394	-0.165132	-1.13242	-0.641535	-2.7147	0.497397	1.67783	0.000158606	-1.24492	-3.03656	-1.77661
	pseudo21	9684132	9684523	100	Pav_sc0003169.1_g140.1.br	hypothetical protein VITISV_028677	-1.04812	-1.78327	-2.11085	0.972482	-0.527664	0.888191	0.396233	-0.487172	-0.852048	1.04776	1.69574	2.34614	0.00208811	2.16398	1.36121	3.36921
	pseudo21	10939933	10940268	100	Pav_sc0003258.1_g040.1.mk Pav_sc0003258.1_g050.1.br	polyphenol oxidase I, chloroplastic-like laccase-11-like	-2.90457	-3.2789	-6.14856	0.129301	1.63589	0.439284	-0.969851	-0.87971	-4.11423	-3.8401	1.01863	2.11669	4.68012e-07	4.47057	2.149	4.68158
	pseudo24	6174861	6175200	100	Pav_sc0007787.1_g020.1.br	Unknown	-5.59155	-6.03722	-6.21111	-6.22521	-1.48225	1.93927	-0.523018	0.0979578	2.77635	-5.4329	-3.01368	3.66272	3.54203e-07	6.41009	7.44473	8.01686
	pseudo24	10375846	10376264	100	Pav_sc0009406.1_g010.1.br	Unknown	-3.2936	-4.7872	-5.88439	-4.09399	-5.19503	0.188255	1.16656	1.05813	-1.58482	0.0266843	-4.7745	2.26324	0.000209574	2.98153	4.9089	5.23835
	pseudo3	560144	560547	100	Pav_sc0000100.1_g210.1.br	pentatricopeptide repeat-containing protein At1g62914, mitochondrial-like	-2.97176	-3.41815	-3.56037	1.11956	0.977406	-1.37401	-0.781192	-2.11505	-1.91786	-1.41118	0.373514	-0.817986	0.000687129	3.88814	1.81692	2.8721
	pseudo5	10582603	10583126	100	Pav_sc0000293.1_g010.1.br	Unknown	-1.36243	-0.900046	-3.86871	0.309257	2.23531	1.39988	-0.521114	-1.25758	-0.598565	0.234141	0.710781	1.04608	0.00034555	3.11184	0.837986	2.296
	pseudo5	5731319	5731592	100	Pav_sc0000254.1_g790.1.br Pav_sc0000254.1_g800.1.br	uncharacterized protein LOC103332039 uncharacterized protein LOC103332041	-1.78114	-5.23484	-3.99186	-0.207246	1.28296	-1.65075	-0.284921	-3.3088	-1.81985	0.456037	-0.153976	-0.0379249	1.20389e-05	3.24976	1.66352	3.09259
	pseudo7	4086647	4087067	100	Pav_sc0000403.1_g100.1.br	glycine-rich RNA-binding protein GRP1A	-1.32277	-2.65153	-2.33785	0.0749463	1.62393	1.56852	-1.48262	-1.18213	-0.260154	-1.51393	0.263699	0.361958	0.00145335	3.23028	1.11017	1.90596
	pseudo16	9813528	9813862	99	Pav_sc0001428.1_g060.1.br Pav_sc0001428.1_g070.1.mk	Unknown protein LOL1	-0.357611	-1.40439	-1.87098	2.4445	2.40758	1.10368	1.04916	0.288449	0.757203	0.725282	1.94656	-0.289901	0.000380576	3.17145	1.79875	2.14358
	pseudo19	972415	972618	99	Pav_sc0001958.1_g080.1.br	Unknown	0.286063	-0.66896	-0.327965	1.9823	3.16657	3.48003	2.53705	0.562055	3.31302	2.85221	2.72305	3.40829	0.000184037	3.18704	2.70269	3.20798
	pseudo2	6406878	6407310	99	Pav_sc0000079.1_g030.1.br	Unknown	1.90723	0.702715	0.900712	-1.15984	-1.1267	-0.281109	1.07666	0.527136	1.06257	-1.0023	-2.41428	-2.85244	0.000108605	-2.06756	-0.361666	-3.13414
	pseudo22	10433846	10434061	99	Pav_sc0004318.1_g010.1.br	Unknown	-1.05339	-0.174116	0.722119	1.21332	-0.897906	-0.692265	3.03232	-0.966605	3.9652	1.98271	2.90678	3.51235	5.65678e-05	0.20323	3.0101	2.92145
	pseudo3	10169228	10169632	99	Pav_sc0000143.1_g010.1.mk	40S ribosomal protein S4-1	-1.33932	-3.33753	-1.61173	2.04394	0.136275	1.3472	1.32695	-2.31125	0.488367	-0.420924	-2.02074	0.0754088	8.18845e-05	3.2413	2.32417	1.31749
	pseudo7	7307124	7307430	99	Pav_sc0000428.1_g110.1.br Pav_sc0000428.1_g120.1.br	hypothetical protein PRUPE_ppa002194mg Unknown	-0.365401	-2.34283	-2.13858	0.107601	0.567786	2.19502	1.6518	-3.63501	3.66834	1.10055	0.672872	1.9479	0.000297981	2.57204	3.73067	2.66177
	pseudo7	9418846	9419134	99	Pav_sc0000464.1_g100.1.br	transcription factor MYB114-like	-0.463795	-1.62403	-2.932	0.77887	0.121138	1.21984	-2.3459	-2.12324	-2.04243	0.783071	2.13127	2.15472	2.09908e-05	2.12024	-0.819387	3.16037
	pseudo9	6260866	6261164	99	Pav_sc0000582.1_g410.1.br	hypothetical protein	-0.454181	-0.338536	-0.726783	1.83947	3.34897	2.2614	2.48489	0.780927	-1.15838	0.160449	0.917532	0.379869	0.000860572	3.12685	1.86936	1.01946
	pseudo1	6965661	6966243	98	Pav_sc0000030.1_g1460.1.mk	E3 ubiquitin-protein ligase RING1	-4.0256	-4.92617	-3.81136	-5.39669	-5.7817	-5.34589	1.50183	-4.61449	1.87928	-4.93787	2.16045	-4.63088	0.000842985	-1.31553	5.30679	4.77872
	pseudo1	3000218	3000551	98	Pav_sc0000017.1_g360.1.br	Unknown	-1.53995	-2.64414	-3.06278	0.359887	1.03493	2.28151	3.0896	0.28911	0.338767	-0.171515	0.255722	1.63623	0.000159319	3.71604	4.14076	3.05727
	pseudo10	6643596	6643777	98	Pav_sc0000652.1_g660.1.br	Unknown	-1.86328	-2.24262	-0.813547	-2.83344	3.94194e-05	2.23509	2.33734	-2.73468	1.94769	0.94204	-1.1272	1.73731	0.000177328	2.47058	3.10232	2.43686
	pseudo12	2623702	2623864	98	Pav_sc0000812.1_g030.1.br	Unknown	-1.28466	-2.31488	-5.37745	1.54862	2.77536	3.41581	1.61369	2.73252	5.10012	2.67061	3.64997	3.14128	-7.3461e-13	5.00764	6.11365	5.44809
	pseudo12	2943138	2943378	98	Pav_sc0000815.1_g060.1.br	Unknown	-4.72894	-4.75373	-0.203886	-1.56055	-0.843305	-1.50056	2.49437	-4.83106	2.49108	0.755828	-2.20338	3.43454	2.41116e-09	0.406395	3.58192	3.75344
	pseudo17	1433942	1434147	98	Pav_sc0001478.1_g100.1.br	LOW QUALITY PROTEIN: DEAD-box ATP-dependent RNA helicase 2-like	2.50882	3.56371	3.29817	-0.0983035	-0.50861	0.506571	2.11854	1.51517	3.22618	2.5512	0.721683	2.34767	0.000304761	-3.16117	-0.724092	-1.11822
	pseudo17	3952400	3952658	98	Pav_sc0001518.1_g420.1.br	zinc finger MYM-type protein 1-like	-4.066	-4.18457	0.557961	0.484746	1.10087	2.1081	1.55736	3.55455	2.93278	2.20696	2.43325	3.67033	1.91405e-06	2.30749	3.81462	3.84157
	pseudo18	10432078	10432358	98	Pav_sc0001911.1_g160.1.mk	plastidal glycolate/glycerate translocator 1, chloroplastic-like	-1.39648	-1.60615	-0.255134	0.522768	0.512197	-0.616288	1.12452	-0.261901	1.11433	1.18462	2.0104	2.73702	0.000375404	1.18488	1.74397	3.06822
	pseudo18	4769312	4769617	98	Pav_sc0001794.1_g510.1.mk	putative receptor protein kinase ZmPK1	-1.12031	-2.08723	0.243118	0.8368	2.86702	2.69353	0.935658	-0.437983	1.21369	1.45048	0.494547	1.98616	0.000387322	3.04903	1.40344	2.10871
	pseudo21	1254852	1255357	98	Pav_sc0002756.1_g050.1.br	trafficking protein particle complex subunit 1 isoform X2	-3.42489	-2.31009	-2.42948	-0.206172	-2.07757	-1.82462	2.68654	-2.67606	0.978626	0.226417	-4.83444	-1.11659	7.04991e-05	1.52871	4.15612	1.79424
	pseudo22	2134517	2134866	98	Pav_sc0003492.1_g130.1.br	Tag=/pseudo	0.112776	-0.125437	1.25061	-3.75094	-2.02298	-2.49899	-0.575579	-0.102463	-0.775962	-0.992233	-0.869827	0.038294	0.000279434	-3.13812	-1.0015	-1.07572
	pseudo4	8821621	8822109	98	Pav_sc0000207.1_g440.1.br	Unknown	-5.13822	-2.61675	-4.3914	-2.76236	2.11271	-3.13473	-4.66619	-1.77756	1.12372	1.23653	2.50864	2.42019	0.000933462	4.26176	3.39221	5.80855
	pseudo4	9197460	9197889	98	Pav_sc0000207.1_g1120.1.mk	uncharacterized protein LOC103323749	-5.06515	-1.16789	-2.77591	-1.78517	-0.302968	0.99808	-2.01758	-0.0492122	0.21675	0.143011	0.218537	1.76918	4.49338e-07	2.31883	1.93572	3.19243
	pseudo5	4366951	4367423	98	Pav_sc0000243.1_g400.1.mk	probable receptor-like protein kinase At1g80640	-3.11451	-5.15752	-1.54372	0.720023	0.0461917	-0.0213216	1.85255	-0.27602	-1.68453	-0.705579	-1.24411	0.0110717	1.17778e-07	2.91339	3.28698	2.07029
	pseudo5	7669782	7670390	98	Pav_sc0000260.1_g240.1.mk	replication factor C subunit 3-like	-4.53001	-2.89905	-4.41718	0.386086	-1.9846	-2.62195	1.06773	-2.32211	-1.74563	-0.175345	-0.106704	-0.513085	0.000301176	2.94153	3.53282	3.48802
	pseudo1	7780007	7780377	97	Pav_sc0000036.1_g130.1.mk	O-acyltransferase WSD1-like	-4.20187	-2.95673	-3.21738	-1.37313	0.573444	-0.490636	1.74597	0.0504273	0.621599	-0.794505	-1.98312	0.311024	5.34587e-14	3.15322	4.35022	2.83227
	pseudo1	363580	363856	97	Pav_sc0000003.1_g120.1.mk	protein trichome birefringence-like 43 isoform X1	0.0327699	-0.00705285	-2.52956	0.825643	2.31953	2.2413	3.4913	2.07523	1.59058	2.87078	1.15427	2.66545	9.38132e-05	2.39081	3.07545	2.85777
	pseudo10	2705845	2706364	97	Pav_sc0000624.1_g580.1.mk	auxin efflux carrier component 2-like	-2.92306	-3.80824	-2.9186	-3.03777	-1.27496	-2.00316	-3.99142	-3.73326	-3.07226	0.4576	0.513914	2.2957	0.000411998	1.22544	-0.384719	4.52261
	pseudo11	5513072	5513372	97	Pav_sc0000731.1_g110.1.br	Unknown	-2.60741	-3.67709	-2.12815	-0.695268	-3.39288	1.08978	2.20207	-0.685408	-1.50762	0.593096	-0.0517054	-1.73129	0.000130825	2.59264	3.56508	2.55834
	pseudo12	6218336	6218801	97	Pav_sc0000843.1_g1080.1.mk	hypothetical protein PRUPE_ppa011703mg	-2.78483	-2.40503	-5.29611	-1.29282	-0.119851	-2.35813	-0.968769	-0.39176	-0.911195	1.99782	-2.83629	0.585647	6.49705e-05	2.08386	2.3284	3.97083
	pseudo15	7401723	7401959	97	Pav_sc0001248.1_g300.1.br	uncharacterized protein LOC103323322 isoform X2	-1.4732	-3.13968	1.06704	-1.70476	2.39787	3.51882	1.34067	2.8708	3.75371	-0.282848	3.53824	1.37066	2.80333e-14	2.72971	3.18342	2.54825
	pseudo18	6703865	6704132	97	Pav_sc0001825.1_g310.1.mk	probable ubiquitin-like-specific protease 2B	-1.41326	-1.52042	-2.3163	-2.47634	2.09985	3.71122	1.34007	1.46307	2.96299	1.54882	2.88016	2.89478	0.000272983	4.24728	3.82269	4.26049
	pseudo19	818482	819077	97	Pav_sc0001954.1_g070.1.mk	Unknown	1.08809	-0.0916449	-0.469645	-1.89492	0.76137	-0.613853	-0.432904	-1.85085	-3.18223	-4.13456	-2.58132	-3.26258	0.00105608	-0.532716	-1.74689	-3.52813
	pseudo4	2720804	2721229	97	Pav_sc0000168.1_g120.1.mk	uncharacterized protein LOC103328506	-1.74279	-4.20066	-3.78479	-0.386563	-0.444615	-2.15001	1.13083	-1.17058	-0.161797	0.719205	1.01264	0.875193	5.31577e-05	2.01862	3.05084	3.69093
	pseudo11	8342560	8342775	96	Pav_sc0000755.1_g110.1.br	Unknown	2.35198	2.25448	3.28884	0.0833157	1.76983	1.87521	0.209513	2.23649	3.05484	-0.0380922	-1.32687	-0.0739701	0.000392104	-1.27177	-0.47081	-3.08073
	pseudo11	8462863	8463118	96	Pav_sc0000755.1_g300.1.br	Unknown	-2.77473	-0.602726	-3.51979	-1.75488	-2.18534	-3.38724	0.2116	0.993954	-0.211081	2.2509	-3.19553	2.44162	8.54277e-05	-0.543846	2.17004	3.52995
	pseudo12	1979323	1979591	96	Pav_sc0000800.1_g900.1.br	uncharacterized protein LOC103328488	-1.58204	-1.76182	-0.570399	0.536985	2.32998	2.50451	1.25389	1.48332	2.46925	1.10806	2.13385	1.78584	0.000332733	3.22221	3.04092	2.93978
	pseudo13	5690084	5690459	96	Pav_sc0000969.1_g090.1.br Pav_sc0000969.1_g100.1.br	Unknown Unknown	-0.134356	-0.550745	2.26779	-1.04084	0.645965	1.82167	0.0610397	-0.546385	2.4614	-1.33845	-2.26944	-2.53432	0.0013505	-0.198482	0.174858	-3.04707
	pseudo13	6218857	6219584	96	Pav_sc0000977.1_g110.1.mk	zinc finger A20 and AN1 domain-containing stress-associated protein 3	-2.56661	-3.494	-3.88876	-1.75735	-0.215446	-2.80618	-1.33111	-2.57236	-2.25209	-0.442547	0.602668	0.39286	0.000480466	1.99975	1.25441	3.45604
	pseudo15	4242540	4242869	96	Pav_sc0001196.1_g2110.1.mk	Unknown	-2.35044	-1.81361	-4.75907	-2.61836	2.06682	0.171915	1.0937	0.474713	-0.430293	-1.0066	2.06176	2.57423	0.000121721	3.4043	3.04326	4.36021
	pseudo18	4331271	4331588	96	Pav_sc0001786.1_g120.1.mk	LOW QUALITY PROTEIN: pentatricopeptide repeat-containing protein At2g04860	-3.95965	-1.874	-3.97486	-2.19331	0.788978	1.64426	-3.17902	-1.78785	0.14859	0.92681	-3.14849	1.23156	0.000375158	3.66211	1.91257	3.44446
	pseudo24	8526988	8527606	96	Pav_sc0008652.1_g010.1.br	Unknown	-4.12593	-2.77084	-0.979507	-0.121429	1.73485	0.96245	-0.448593	1.0785	-1.62672	-0.0839121	0.0817595	-0.721208	0.00243191	3.1236	2.15595	1.87535
	pseudo25	144719	145169	96	Pav_sc0009842.1_g020.1.mk	ethylene-responsive transcription factor 1-like	2.45249	1.59548	2.37951	-0.24551	2.65567	1.38383	2.51978	-1.73429	1.40902	-1.34154	-1.29699	-0.165663	0.00122389	-0.489945	-0.656476	-3.01635
	pseudo3	6054620	6054989	96	Pav_sc0000123.1_g460.1.br Pav_sc0000123.1_g480.1.br	Unknown Unknown	-1.03914	-0.939975	-2.34629	-0.703133	2.21431	2.69083	3.15944	2.47613	-1.16147	-0.786439	-0.474259	-0.374654	0.00303974	3.28143	3.63323	0.781809
	pseudo7	7303977	7304489	96	Pav_sc0000428.1_g100.1.br	hypothetical protein NEMVEDRAFT_v1g3769	-1.28075	-3.11246	-1.54962	0.0625956	1.92631	1.62775	1.23459	-1.29842	0.0393226	0.360839	1.73332	2.7374	0.00258587	3.19121	2.12408	3.6983
	pseudo1	6493883	6494276	95	Pav_sc0000030.1_g650.1.br	Unknown	-4.36504	-5.83904	-4.30626	-4.72858	-3.7341	1.67871	-4.2997	-3.21546	2.38154	-0.114649	-3.90095	-1.66572	6.00159e-09	4.82976	5.52581	3.48593
	pseudo10	786684	787008	95	Pav_sc0000608.1_g240.1.br	bromodomain-containing protein DDB_G0280777-like	-0.999727	-0.718288	-1.27565	-1.27987	-0.0781841	0.822713	2.3325	1.57636	2.32719	2.80016	1.71972	1.85501	0.000578266	1.04018	3.09959	3.18959
	pseudo10	3631224	3631903	95	Pav_sc0000624.1_g2170.1.mk	spermidine hydroxycinnamoyl transferase	-2.16253	-3.51495	-2.98688	-1.53769	1.12371	0.60593	-1.11496	-1.72634	-0.748644	-1.01055	-1.28825	-0.965436	0.000678387	3.21065	1.63698	1.69814
	pseudo11	3108121	3108699	95	Pav_sc0000704.1_g930.1.br	Unknown	-4.16256	-2.108	-3.95963	-2.93023	0.648159	-2.18856	-2.3571	-4.36177	1.39137	1.14982	-2.04259	-0.6844	0.00231333	2.44542	3.02561	3.13075
	pseudo18	1029151	1029551	95	Pav_sc0001710.1_g560.1.mk	mitochondrial arginine transporter BAC2-like	-2.0687	-1.74317	-1.29081	1.75679	1.40811	2.31652	1.64315	-0.873005	-0.242061	-2.10635	-1.57177	-2.54047	0.00034597	3.54173	2.25511	-0.353019
	pseudo19	1314856	1315330	95	Pav_sc0001963.1_g450.1.mk	transcriptional repressor nrdr	-1.15359	-2.369	-1.41361	1.69115	1.85034	0.59765	0.160947	-0.907276	-2.99429	-0.444668	-0.403012	0.744517	1.18902e-06	3.03509	0.802821	1.63648
	pseudo22	620838	621319	95	Pav_sc0003326.1_g130.1.br	Unknown	-1.4165	-1.14095	-1.59106	-0.208959	-1.73447	-0.593598	1.44399	2.37548	1.21192	0.494935	-1.03189	0.90418	0.000149152	0.656422	3.14007	1.70035
	pseudo23	8223716	8223983	95	Pav_sc0005746.1_g180.1.br	cyclic nucleotide-gated ion channel 1-like	-3.28153	-1.01129	-0.745324	-0.34189	2.72816	1.53609	2.8336	2.14644	0.443138	2.9646	2.36098	3.81783	7.13815e-05	3.10911	3.43344	4.49972
	pseudo4	2827766	2827973	95	Pav_sc0000169.1_g100.1.mk	Uncharacterized protein TCM_033523	-1.56208	-2.09128	0.742954	0.23487	1.02299	3.30896	0.876228	1.17388	3.08412	3.35156	2.16746	2.49207	0.000199557	2.54568	2.48419	3.17727
	pseudo7	5640309	5640974	95	Pav_sc0000410.1_g770.1.mk Pav_sc0000410.1_g780.1.mk	mitochondrial import receptor subunit TOM40-1 NEDD8-specific protease 1-like	-4.12826	-5.52812	-1.77208	-0.1385	1.50776	-1.45033	0.470553	-0.98101	-2.11987	-2.43071	0.485834	-1.46864	0.000561338	3.46999	2.51367	2.38941
	pseudo8	5167835	5168342	95	Pav_sc0000496.1_g140.1.mk	hypothetical protein PRUPE_ppa000350mg	-1.55657	-2.5888	-3.58766	2.08401	1.32125	0.186999	0.699141	-1.66468	-2.64009	0.551825	-1.47367	-0.767511	4.96492e-06	3.74044	1.83274	2.03387
	pseudo8	6796847	6797408	95	Pav_sc0000503.1_g390.1.br	uncharacterized protein LOC103959296	-0.852561	-2.49372	-2.33541	0.369644	0.950564	1.71209	2.60084	0.0951777	0.0558262	1.18016	-0.387387	0.285052	7.66184e-05	2.80616	3.13654	2.19261
	pseudo14	3014440	3014671	94	Pav_sc0001059.1_g200.1.br	Unknown	2.12109	2.59498	2.62842	0.992442	1.43889	1.64858	1.9633	1.91823	3.44999	-1.1734	-0.714494	-0.704823	5.89576e-05	-1.08088	0.166824	-3.31432
	pseudo20	1702378	1702848	94	Pav_sc0002327.1_g480.1.br	Unknown	-2.17108	-2.33278	-3.88956	-0.709211	-1.91132	0.223675	1.48904	0.197416	-2.26684	-2.16204	-2.29881	-1.74732	4.94567e-05	2.06724	3.09208	0.570106
	pseudo20	2598139	2598441	94	Pav_sc0002358.1_g050.1.br	Unknown	-3.0855	-5.13143	-5.69257	-0.822238	-0.849797	-4.22204	0.406588	-3.60537	2.63334	0.744642	2.30829	-0.647609	0.000135268	2.82504	5.52193	5.45493
	pseudo3	7244525	7244905	94	Pav_sc0000129.1_g1010.1.br	tubulin--tyrosine ligase-like protein 12	-0.814057	-2.70838	-2.57099	0.86917	1.05274	0.265513	1.07956	2.01835	0.524042	1.9227	1.16399	2.54428	0.000365157	2.51939	3.0945	3.73668
	pseudo4	6932139	6932597	94	Pav_sc0000196.1_g040.1.br	Unknown	-3.79842	-2.80719	-2.35215	-0.959863	-1.24353	1.89893	0.73197	-2.93033	1.83872	1.14526	-1.87536	-1.10536	0.00212214	3.50632	3.70886	2.84452
	pseudo4	2108261	2108540	94	Pav_sc0000162.1_g270.1.br	uncharacterized protein LOC103328853	-1.10884	-0.620858	-1.71704	1.72606	2.10473	2.40205	1.95605	-0.488276	1.86964	1.37441	0.542421	1.07093	0.000475462	3.18475	2.53994	2.11656
	pseudo14	8841258	8841594	93	Pav_sc0001112.1_g130.1.br	reticuline oxidase-like protein	-1.90848	-1.9844	-1.89828	-0.0375836	-0.706295	0.301542	0.371126	2.00073	0.421569	-0.526122	3.0788	0.138146	0.000122384	1.84043	3.07496	3.70163
	pseudo15	7829772	7830165	93	Pav_sc0001251.1_g430.1.br	Unknown	-3.66337	-5.95935	-4.4569	-0.732263	-6.13496	-4.37974	3.01263	-5.47179	-0.138496	-5.07418	1.52202	2.75531	6.53559e-07	2.24078	6.00117	6.1021
	pseudo2	6152376	6152728	93	Pav_sc0000079.1_g010.1.br	Unknown	1.71783	0.254558	1.99024	-2.10713	-1.82144	-2.31625	-1.69206	-1.23657	-1.13707	-1.02563	1.70495	-0.738453	0.000808649	-3.56218	-2.83067	-0.958608
	pseudo3	3948340	3948608	93	Pav_sc0000110.1_g020.1.br	putative ciliary rootlet coiled-coil protein-like 2 protein	-1.1461	-1.32203	0.105211	2.19995	2.17806	2.66809	2.25206	1.66875	1.96626	2.90375	2.68077	0.99485	0.00156921	3.00525	2.62018	3.0432
	pseudo4	8382247	8382548	93	Pav_sc0000206.1_g300.1.br	cytochrome P450 714C2-like	-2.32756	-1.60369	-2.46095	-0.680869	-0.428246	1.02771	0.377166	2.13404	-1.33996	2.23848	0.835882	-0.710745	0.000120479	2.26232	3.09919	3.3252
	pseudo6	7305883	7306226	93	Pav_sc0000355.1_g280.1.mk	hypothetical protein L484_017364	-3.01012	-2.97094	-2.55348	-2.13545	0.634238	0.969954	2.1919	-1.35553	-0.494094	0.537322	-2.59793	-0.683717	0.00172821	3.1471	3.74795	2.4075
	pseudo7	4574656	4575088	93	Pav_sc0000405.1_g470.1.mk	uncharacterized protein LOC103329471	1.01209	-0.00230308	0.444334	-0.462426	-0.097241	-1.32758	-0.317061	0.831509	-1.8924	-3.12058	-2.41684	-3.32146	6.51965e-06	-1.08763	-0.617813	-3.44333
	pseudo8	2268686	2269367	93	Pav_sc0000480.1_g1110.1.mk	probable RNA 3'-terminal phosphate cyclase-like protein	-2.52028	-5.0104	-3.63223	-1.49332	-2.78622	-1.43227	-1.33949	-2.75055	-3.02013	-0.537528	1.02422	0.468291	0.000131175	1.60626	1.22181	3.84384
	pseudo15	6953490	6953912	92	Pav_sc0001243.1_g030.1.br	Unknown	1.99684	0.75445	1.76253	0.753524	0.206638	-0.534705	1.6407	1.50234	0.573666	-1.62175	-2.26415	-1.57044	0.000534703	-1.36154	-0.286083	-3.3825
	pseudo15	7104648	7104886	92	Pav_sc0001243.1_g370.1.mk	ras-related protein RABH1b-like	-1.85869	-0.971325	-2.3594	1.79397	-0.0372439	0.377428	2.33693	1.16317	-2.36396	2.35001	2.52757	2.91535	2.10657e-06	2.54957	2.93241	4.2305
	pseudo22	8908637	8908864	92	Pav_sc0004151.1_g020.1.mk	GTP-binding protein ERG	-0.564899	-0.205062	-1.47397	3.09795	2.61681	3.68983	0.80806	0.680258	3.67894	-0.0701474	0.889363	2.38481	0.000500811	3.85798	3.0858	2.07632
	pseudo23	3722548	3722849	92	Pav_sc0004913.1_g030.1.br	uncharacterized protein LOC103343639	0.916758	-2.13803	-1.04416	0.847313	-0.285429	1.64034	1.1857	-0.375429	-1.08062	3.7802	1.78577	2.09654	0.000881626	1.1418	0.43643	3.04533
	pseudo4	9624298	9624588	92	Pav_sc0000209.1_g200.1.br	Unknown	-0.788447	-1.6386	-0.980392	-1.85464	-0.427554	0.794348	3.17567	-1.41804	-2.5131	0.290872	2.01359	2.6202	0.000219649	0.969094	2.76823	3.01957
	pseudo7	9855062	9855394	92	Pav_sc0000464.1_g820.1.mk	U-box domain-containing protein 4	-1.96077	-3.72458	-2.46202	1.25229	1.12947	-0.0434115	1.24104	-0.501395	-0.0644638	-0.09733	-1.70993	1.55508	0.000255797	3.43005	2.96957	3.02321
	pseudo1	2065735	2066050	91	Pav_sc0000009.1_g1310.1.mk	paired amphipathic helix protein Sin3-like 2	-0.885425	-1.12558	-2.88294	-2.57107	0.0748284	1.35075	3.03183	-0.214685	-2.25651	2.18837	-3.20013	-0.398988	5.88326e-05	1.73236	3.02641	2.25669
	pseudo11	9534688	9535330	91	Pav_sc0000762.1_g040.1.mk	BRCA1-associated protein-like	-2.3017	-3.67867	-3.92524	-2.75117	0.115335	0.855595	-0.0996084	-0.449537	-0.204047	-1.24546	-1.90416	0.685469	0.000152159	3.13274	2.8693	2.72793
	pseudo11	6361107	6361471	91	Pav_sc0000740.1_g090.1.br	Unknown	-2.41622	-3.01302	-1.51229	-0.151837	0.516946	0.732592	-0.874702	1.98397	1.17267	-1.09667	-3.11998	0.34073	0.00164543	2.59293	3.35163	1.48234
	pseudo12	9458769	9459141	91	Pav_sc0000872.1_g070.1.mk	GDSL esterase/lipase At5g55050-like	-1.09445	-2.28325	-2.57506	-2.83611	-2.32127	1.8582	2.22067	-0.557663	0.901107	-0.68652	-1.88827	1.55302	0.000153689	2.23642	3.09846	2.18461
	pseudo12	8335525	8335748	91	Pav_sc0000862.1_g430.1.mk	uncharacterized protein LOC103323003 isoform X1	-2.21381	-1.88932	-2.60055	0.441816	1.95825	-0.155473	1.42133	-1.00434	0.0942076	2.27969	1.41582	-1.05596	0.000129234	3.23938	2.70619	3.62153
	pseudo12	4247836	4248155	91	Pav_sc0000828.1_g020.1.br	uncharacterized protein LOC103328417	0.623542	-0.175264	2.04455	-1.38898	1.21384	0.957935	2.29743	-1.37095	2.66238	-1.72912	-4.35106	-1.78248	0.000495144	-0.49653	0.82831	-3.35276
	pseudo14	5341480	5341866	91	Pav_sc0001084.1_g040.1.br	uncharacterized protein LOC103324446	-2.10957	-3.95436	-2.08358	0.343755	-2.49715	1.81801	0.653728	-2.01273	-0.545421	-1.57341	-1.49299	-1.33923	0.000239547	3.22395	2.2356	1.0298
	pseudo18	6544863	6545148	91	Pav_sc0001825.1_g020.1.mk	cyclin-dependent kinase E-1	-1.09864	-2.66142	-0.961318	-1.72438	0.972504	3.2649	0.43846	3.01412	2.37519	0.941009	3.23817	3.35498	0.000544458	3.38286	3.68279	4.24486
	pseudo19	2487569	2488123	91	Pav_sc0001994.1_g010.1.br	uncharacterized protein LOC103326508	-4.13539	-2.87568	-2.49869	-3.06409	-4.84102	-3.73936	1.35528	-2.19209	-0.0412161	-2.34461	-0.00858768	-2.19889	0.00148743	-0.690413	3.34062	1.92848
	pseudo19	8220274	8220800	91	Pav_sc0002208.1_g030.1.mk Pav_sc0002208.1_g040.1.mk	V-type proton ATPase 16 kDa proteolipid subunit-like abhydrolase domain-containing protein 4	-1.51542	-5.97722	-6.64386	-0.47744	-2.15285	0.487152	1.40104	-1.55385	-1.64247	-1.13326	-2.41719	-1.05955	0.000229743	2.64193	3.13574	1.57969
	pseudo2	4276818	4277516	91	Pav_sc0000069.1_g110.1.br	Unknown	-3.71213	-4.09803	-3.35991	0.210009	0.95753	-0.816884	-0.610499	0.430967	0.943344	-1.40464	0.88471	-1.24502	0.000300237	3.98154	4.08029	3.51101
	pseudo23	10866977	10867600	91	Pav_sc0006201.1_g030.1.br Pav_sc0006203.1_g010.1.br	hypothetical protein PRUPE_ppa1027157mg, partial sentrin-specific protease 1-like	0.130015	-2.36087	1.08557	-0.802904	-2.08781	-0.946333	-0.0208428	-2.02828	-0.746314	-4.13029	-4.18943	-1.83834	4.12666e-05	-1.36169	-0.900858	-3.12299
	pseudo1	8177612	8177896	90	Pav_sc0000038.1_g030.1.br	uncharacterized protein LOC103328417	-2.99952	-0.137741	-1.31179	1.41686	2.5995	2.5789	2.38701	1.66547	2.35008	1.60622	2.89956	1.37013	0.000572738	3.35543	3.23218	3.18769
	pseudo12	661351	661792	90	Pav_sc0000788.1_g160.1.br	uncharacterized protein LOC103328417	2.48948	2.68911	2.33704	-1.93021	-2.72883	0.103592	0.331426	-0.301423	-1.08141	1.53729	1.94526	-0.700077	0.000412558	-3.52434	-2.75128	-1.21592
	pseudo13	9077097	9077486	90	Pav_sc0001003.1_g300.1.mk	transcription factor MYB86-like	-4.60034	-2.90698	-1.3286	-0.93991	2.26229	-1.15375	1.24886	-0.330862	-0.589156	-1.46411	-1.02922	1.47885	0.000105536	3.33227	2.74386	2.66795
	pseudo13	1957110	1957693	90	Pav_sc0000893.1_g450.1.mk Pav_sc0000893.1_g460.1.mk	two-component response regulator ARR1 CRAL-TRIO domain-containing protein YKL091C isoform X1	-1.41846	-2.34089	-3.8985	0.749294	0.652898	-0.0164117	1.25885	-1.96395	-0.114497	-1.14978	1.70758	2.26557	0.000794328	2.73186	2.48428	3.73886
	pseudo16	9151121	9151999	90	Pav_sc0001413.1_g370.1.mk	hypothetical protein PRUPE_ppa011765mg	-1.97011	-2.31623	-3.66896	-0.889065	-2.73249	-0.0412007	0.253917	0.719603	1.28752	-4.31674	-3.05224	-1.92381	2.76248e-06	1.63651	3.30395	-0.299916
	pseudo16	3561157	3561396	90	Pav_sc0001328.1_g190.1.br	Unknown	-4.19236	-1.90329	-2.39188	-2.47256	-0.797411	-0.0507807	0.818811	-1.30101	0.992171	-0.11659	0.572755	-4.3366	0.000634966	1.74741	3.02042	2.26239
	pseudo18	3467080	3467679	90	Pav_sc0001762.1_g050.1.br	LOW QUALITY PROTEIN: probable alpha-mannosidase I MNS4	0.235299	2.36521	-1.26821	0.634412	-1.67356	1.28562	-0.0931917	0.34267	-2.04929	-1.43408	-2.3491	-2.51891	0.00305366	-0.648174	-1.46263	-3.18653
	pseudo18	6205191	6205408	90	Pav_sc0001813.1_g050.1.br	uncharacterized protein LOC103342084	-1.89738	-1.48075	-1.23215	-1.76018	-1.79162	0.713345	0.413671	0.284559	3.15931	-1.85542	1.34199	-1.12401	2.09494e-07	1.07923	3.44786	1.63566
	pseudo20	8897533	8897835	90	Pav_sc0002588.1_g030.1.mk	hypothetical protein PRUPE_ppa020556mg	1.07433	-0.675481	-2.22819	3.29228	3.80245	2.33517	0.443125	3.51249	-0.293863	1.94453	2.16846	1.9153	4.50225e-06	3.28934	2.20578	2.04049
	pseudo21	2072408	2073293	90	Pav_sc0002792.1_g280.1.mk	Unknown	-1.98641	-3.57082	-2.92687	-2.08324	-1.86512	-2.89358	0.692813	-1.02817	-0.0864375	-0.337784	-2.57186	1.66598	0.0018752	0.462846	2.70351	3.14246
	pseudo22	6743880	6744306	90	Pav_sc0003846.1_g130.1.br	microtubule-associated protein 70-2-like	-2.08722	-4.45876	-0.972932	1.37897	1.84371	1.46681	-0.0299173	-1.60291	-2.54827	-0.153956	-0.652236	1.11825	0.000514058	3.50214	0.904819	2.22939
	pseudo22	6791489	6791740	90	Pav_sc0003851.1_g070.1.mk	monothiol glutaredoxin-S2	-2.04413	-1.06432	-1.34322	1.50582	2.56316	0.80662	0.469415	-1.07868	-2.65429	1.7766	-0.237902	1.1926	0.000858177	3.23538	0.855314	2.55686
	pseudo22	6055050	6055612	90	Pav_sc0003802.1_g100.1.br	Unknown	-3.49951	-4.49363	-1.25944	-1.84361	0.279948	1.87452	-0.986569	-2.07433	1.4917	0.325881	-3.08409	-0.290272	4.69565e-05	3.2284	2.69072	1.99149
	pseudo22	9636942	9637288	90	Pav_sc0004226.1_g020.1.mk	putative pentatricopeptide repeat-containing protein At3g18840	-2.21324	-1.86431	-2.11248	-3.56029	-1.93172	-0.998671	-1.95301	0.417455	-1.55287	0.519184	-4.26054	2.36019	0.00139148	0.231851	1.42292	3.19759
	pseudo24	612444	612638	90	Pav_sc0006314.1_g010.1.br	Unknown	-1.94584	-6.16836	-2.82507	-6.243	-6.15249	-0.299538	0.0423774	2.65948	2.09976	1.45633	-0.486923	4.1418	-4.08461e-13	1.01835	4.81058	5.67014
	pseudo3	9541115	9541595	90	Pav_sc0000138.1_g150.1.br Pav_sc0000138.1_g160.1.mk	probable dolichyl pyrophosphate Glc1Man9GlcNAc2 alpha-1,3-glucosyltransferase hypothetical protein PRUPE_ppa009597mg	2.19171	0.221089	-0.846178	-1.5547	-3.16699	-2.26812	-0.793786	1.6836	-0.405664	0.666048	-2.56343	-1.10732	0.000254661	-3.25405	-0.469176	-1.50255
	pseudo7	8023802	8024346	90	Pav_sc0000431.1_g390.1.mk	unnamed protein product	-2.79894	-3.52918	-4.38369	-2.24211	-2.73062	0.182391	-0.0364114	-0.0268445	-0.527962	2.03617	-5.58229	-2.90641	0.000130227	2.42761	3.25181	3.93516
	pseudo9	196235	196862	90	Pav_sc0000549.1_g380.1.br Pav_sc0000549.1_g390.1.br	Unknown hypothetical protein PRUPE_ppa017508mg, partial	-0.673021	-2.66663	-2.20215	0.45741	2.68806	1.43359	-0.388491	-0.780786	0.276871	-1.20678	-2.02648	-2.1248	0.000291366	3.392	1.35188	-0.142163
	pseudo1	531	788	89	Pav_sc0000001.1_g010.1.br	Unknown	-3.99199	-4.69261	-4.39112	-4.26942	2.70798	0.393891	-4.08559	2.54896	3.57537	1.39763	-3.73179	1.30221	0	5.72673	6.90126	5.11674
	pseudo14	7518585	7518933	89	Pav_sc0001106.1_g370.1.br	Unknown	-1.17022	-1.45782	-2.33575	0.111363	2.60691	1.01745	-1.15968	-1.63356	-0.130679	0.195543	0.714165	0.0861348	0.000239759	3.19176	0.741962	1.93448
	pseudo15	2629090	2629536	89	Pav_sc0001189.1_g090.1.mk Pav_sc0001189.1_g100.1.mk	nucleobase-ascorbate transporter 12 isoform X1 putative ribonuclease H protein At1g65750	-2.65054	-4.23648	-0.978907	-4.74325	-0.696512	1.07544	2.19612	0.958169	-4.12903	1.48294	-4.97496	2.69982	0.000263142	1.94017	3.1932	3.69556
	pseudo16	804708	804879	89	Pav_sc0001302.1_g240.1.br	LOW QUALITY PROTEIN: disease resistance protein RPM1-like	-4.70456	-4.19182	-5.08096	-4.17553	-3.2899	1.75349	3.06967	-0.777286	3.04496	0.750374	-3.45299	1.29084	0	4.84718	7.13485	5.10511
	pseudo2	10661928	10662471	89	Pav_sc0000096.1_g540.1.br Pav_sc0000096.1_g550.1.mk	Unknown putative calcium-transporting ATPase 11, plasma membrane-type	-0.989846	-2.51674	-1.91082	1.07847	-0.224405	0.962106	0.944626	0.519976	2.32647	1.02367	-3.42513	0.626149	0.000167023	2.38027	3.14881	1.95845
	pseudo21	8022700	8023014	89	Pav_sc0003094.1_g080.1.br	Unknown	-3.73554	-1.62591	-0.249831	1.17579	-4.82937	2.56783	-0.232931	0.231947	2.23011	2.77915	1.4613	3.57142	2.22624e-05	2.72933	2.43739	4.11624
	pseudo22	5944853	5945431	89	Pav_sc0003792.1_g030.1.mk Pav_sc0003792.1_g040.1.br	pentatricopeptide repeat-containing protein At5g08305 uncharacterized protein LOC103961621	-4.30051	-1.23656	-3.57752	-1.65616	-0.315689	0.678028	-1.3283	1.77205	0.759805	0.182296	1.79285	-0.410198	0.0011843	2.28333	3.30059	3.25948
	pseudo24	10412809	10413014	89	Pav_sc0009441.1_g010.1.br	Unknown	-5.1596	-3.444	-4.66841	1.53366	-2.15986	-1.42335	0.803381	-4.87658	0.434718	-0.298868	2.46989	2.71284	-2.12309e-11	4.45517	4.29776	6.3415
	pseudo24	9725232	9725463	89	Pav_sc0009154.1_g050.1.br	Tag=/pseudo	2.05583	2.03567	2.13995	-1.63735	-1.00489	-0.464409	2.17178	0.0215916	2.40715	0.27106	-0.350006	-0.864726	0.000287269	-3.03566	-0.226512	-2.31775
	pseudo3	5934278	5934688	89	Pav_sc0000123.1_g020.1.br	Unknown	-3.50437	-2.23848	-2.4702	-1.4961	1.17403	1.85798	0.763678	-1.18921	-1.27667	-0.574728	-1.33775	0.0335754	1.33647e-14	3.698	2.40739	2.12131
	pseudo3	1116296	1116552	89	Pav_sc0000102.1_g250.1.mk	probable LRR receptor-like serine/threonine-protein kinase At4g36180	-0.707236	-3.94864	-4.85405	-3.50328	-4.78408	-1.35194	2.26851	-5.39865	-3.85805	1.09643	-3.98567	2.84585	0.000218665	-0.463481	2.78638	3.72161
	pseudo4	638403	638634	89	Pav_sc0000148.1_g430.1.br	Unknown	-0.642603	-0.185934	-4.13278	-3.16609	2.19445	3.81671	2.58445	0.272579	0.532564	1.28703	0.76845	0.483034	1.14614e-10	3.57424	2.45624	1.81339
	pseudo13	5179083	5179504	88	Pav_sc0000941.1_g020.1.br	uncharacterized protein LOC103963587	-1.16926	-2.75493	-2.23881	1.80707	2.25645	-1.19087	0.373586	1.2354	-1.48361	1.82516	-1.64143	-2.33014	0.000540166	3.43715	2.31631	2.33606
	pseudo14	10377485	10378108	88	Pav_sc0001132.1_g240.1.br	hypothetical protein VITISV_042965	0.567073	-1.7007	-1.08124	2.0297	2.00157	1.72357	1.00985	0.719191	0.452617	3.16241	2.40078	2.36305	9.89177e-05	2.33225	1.15267	3.09895
	pseudo16	8913481	8913949	88	Pav_sc0001412.1_g230.1.br Pav_sc0001412.1_g240.1.br	cytochrome P450 71AU50 hypothetical protein B456_010G1258002, partial	0.98975	-0.438997	2.28306	-1.80914	-2.05801	-1.53931	1.21567	-0.20208	-0.112259	1.59067	-0.0104084	-1.93869	0.000708593	-3.12585	-0.882642	-0.831475
	pseudo16	6793109	6793427	88	Pav_sc0001392.1_g460.1.br	Unknown	-3.39219	-2.90152	-2.47699	-0.627308	-2.86443	-1.12315	2.75142	-3.5765	2.28786	-3.91222	-1.75406	-1.17954	0.000238648	1.60564	4.83944	0.976844
	pseudo21	6750146	6750645	88	Pav_sc0003015.1_g020.1.br	thaumatin-like protein 2	-2.40413	-4.73199	-2.31201	-0.491595	0.124282	-0.735805	1.32038	0.622474	-0.499666	1.94416	-0.361739	2.01994	1.64631e-05	2.48859	3.47068	4.34258
	pseudo23	5797696	5797988	88	Pav_sc0005304.1_g010.1.br	histone deacetylase 8	-1.15337	-2.54666	-1.87803	-0.231548	2.80654	1.81594	0.191122	-0.698942	-0.939866	-1.12429	-3.40677	0.711098	0.000150687	3.67061	1.352	1.2946
	pseudo23	8881418	8881693	88	Pav_sc0005892.1_g040.1.br	Unknown	-2.61121	-3.9981	-2.43597	-0.516699	-1.20175	0.0822923	1.50318	-2.85568	0.458236	1.00802	0.367891	-0.657223	3.13818e-05	2.41516	3.40255	3.25927
	pseudo24	9868965	9869425	88	Pav_sc0009202.1_g020.1.br	Unknown	2.56504	1.7511	1.29804	-2.9978	-0.864497	-0.432818	1.84432	0.85694	1.76985	1.26349	-0.596183	-0.700359	0.002761	-3.05266	-0.414199	-1.67491
	pseudo3	7744112	7744489	88	Pav_sc0000129.1_g1980.1.mk	alpha-aminoadipic semialdehyde synthase	1.4671	0.851555	1.13708	-3.14901	0.154052	-0.177723	-1.62277	-1.06465	-2.18803	-3.29017	-2.46489	-1.05545	0.000359345	-1.68191	-2.72708	-3.14623
	pseudo4	486129	486372	88	Pav_sc0000148.1_g140.1.br Pav_sc0000148.1_g150.1.br	Unknown Unknown	0.660243	2.61407	2.04601	1.65474	2.10973	3.08181	2.52239	-0.516801	-0.497297	-0.512614	-2.453	-1.5998	0.000260222	0.429158	-0.72617	-3.28547
	pseudo4	1723136	1723303	88	Pav_sc0000158.1_g090.1.mk	uncharacterized protein LOC103327434	-6.64386	-3.00008	-6.64386	-6.64386	-6.64386	0.675364	2.54255	-4.36961	0.514154	-6.64386	-5.03402	2.67352	-2.94867e-12	3.47926	5.65437	5.4686
	pseudo9	2507753	2508146	88	Pav_sc0000555.1_g220.1.mk	chromo domain-containing protein cec-1-like	-1.08996	-3.84095	-3.63262	-2.40237	0.202416	-0.171614	1.62374	1.53806	0.847517	-0.377498	1.11492	1.08385	5.0876e-05	1.84474	3.64996	3.02702
	pseudo9	6546427	6546922	88	Pav_sc0000582.1_g1050.1.mk	uncharacterized membrane protein At1g06890	1.78271	2.75398	2.61853	-0.57355	-0.771585	-0.715721	0.621734	0.380168	1.50444	-0.782605	-1.53748	-0.814931	0.00042493	-3.12881	-1.52403	-3.44984
	pseudo10	4612450	4612728	87	Pav_sc0000636.1_g020.1.br	ER lumen protein retaining receptor-like	-0.49872	-1.92789	-2.72045	0.748169	1.82466	1.8917	0.912677	0.71953	-1.10123	1.99393	0.799941	2.1809	0.000326405	2.99266	1.83188	3.19234
	pseudo11	317969	318203	87	Pav_sc0000689.1_g500.1.mk	threonine synthase 2, chloroplastic	0.324542	-0.975234	-2.64587	1.36211	2.6557	0.631347	1.55299	-0.438742	1.57732	1.84209	2.32233	3.09681	0.000173784	2.43981	1.79306	3.15782
	pseudo13	3288185	3288509	87	Pav_sc0000908.1_g270.1.mk Pav_sc0000908.1_g280.1.mk	uncharacterized protein LOC103335472 feruloyl CoA ortho-hydroxylase 2-like	-1.03151	-3.15282	-2.74608	-0.0179414	0.443742	0.0218295	2.19249	-0.29351	1.30416	1.09605	-0.462618	-0.0735271	0.000736048	2.16347	3.38755	2.34489
	pseudo16	979510	979854	87	Pav_sc0001305.1_g210.1.br	Unknown	-1.32019	-3.58414	-4.03609	1.32543	-0.669468	0.85359	0.000644428	-2.36752	-1.4659	0.707103	-2.04284	-0.367924	0.000845237	3.18119	1.51421	2.2822
	pseudo17	3170364	3170695	87	Pav_sc0001505.1_g080.1.mk	GATA transcription factor 28-like isoform X1	-2.23005	-1.20548	-5.73047	0.0177406	-1.26812	1.98406	1.8825	-1.9284	-1.63591	-0.290879	-4.16014	-1.75998	0.00168285	3.01583	2.68204	0.81202
	pseudo17	5049388	5049817	87	Pav_sc0001535.1_g170.1.br	Unknown	1.57132	-0.430418	1.35301	0.639449	-2.14364	-1.71258	-0.304289	-0.250537	-0.109226	-2.86582	-1.99351	-2.95191	0.000267339	-1.58514	-1.28209	-3.5983
	pseudo21	274149	274397	87	Pav_sc0002692.1_g090.1.mk	hypothetical protein PRUPE_ppa005111mg	-0.63102	-4.14807	-4.18485	0.369016	-0.709531	0.429589	0.507473	-0.3136	1.5236	-1.65724	1.01084	2.03085	1.55352e-05	2.1018	2.75228	3.08369
	pseudo3	6734806	6735007	87	Pav_sc0000127.1_g270.1.br	TMV resistance protein N-like	-3.35644	-1.37549	-2.8186	-1.76689	3.43728	-2.94626	-2.56045	1.3403	1.91685	3.23447	-2.7905	1.5863	0.000205286	4.17114	3.37396	4.32918
	pseudo8	9849860	9850238	87	Pav_sc0000543.1_g550.1.br Pav_sc0000543.1_g560.1.br	Tag=/pseudo Tag=/pseudo	-1.96134	-3.13912	-5.50524	0.710491	-3.68337	0.376506	-1.31148	-1.14721	-0.272027	-0.132503	1.82361	1.99837	2.98854e-06	2.94082	2.10057	4.42842
	pseudo8	10321210	10321425	87	Pav_sc0000546.1_g090.1.br	uncharacterized protein LOC103321667	-3.17159	-3.79032	-2.66301	-2.22146	-4.13792	2.48603	1.23147	2.55835	2.91582	1.88523	-3.83431	2.03239	7.43705e-05	4.10576	5.532	4.52514
	pseudo9	1750784	1751066	87	Pav_sc0000554.1_g1050.1.mk	LOW QUALITY PROTEIN: heat shock cognate 70 kDa protein	-2.21017	-4.35563	-1.11846	2.48313	0.407285	-0.137051	1.32209	1.37381	-0.512692	-0.795944	-3.10507	-0.923716	5.89589e-06	3.43127	2.99711	0.748966
	pseudo1	2196551	2196762	86	Pav_sc0000010.1_g100.1.mk	protein RER1B-like	-2.69846	-2.66643	-3.63631	-0.614109	-1.27435	0.773551	1.95965	0.685248	-1.62997	-2.16028	-0.175881	-1.23369	9.42161e-05	2.82422	3.8923	1.96856
	pseudo1	6486590	6487123	86	Pav_sc0000030.1_g630.1.br	uncharacterized protein LOC103326821	-0.204271	0.292532	-0.610618	2.61564	3.76096	1.86297	3.07741	0.696023	0.350185	2.36188	2.62069	2.80361	0.00327326	3.08549	2.04459	2.7334
	pseudo10	6609598	6609889	86	Pav_sc0000652.1_g610.1.mk	cytochrome P450 78A9-like	-0.805258	-2.23617	-2.99455	0.427144	-2.04956	0.989154	2.0673	0.241129	1.55433	1.4153	1.94838	-1.86157	0.000229129	1.97248	3.19092	2.90199
	pseudo10	3921065	3921258	86	Pav_sc0000625.1_g130.1.mk	hypothetical protein PRUPE_ppa005719mg	-2.64659	-5.74618	-5.38876	-3.92495	1.32762	1.22586	1.50379	-0.0942099	3.57286	1.45638	3.51328	3.45323	-9.73717e-13	4.60326	6.27633	6.95667
	pseudo13	4452590	4452829	86	Pav_sc0000911.1_g470.1.br	Unknown	-0.896971	-4.2443	-3.23946	-3.27134	1.09688	1.85873	2.36617	-2.11785	3.55771	2.09014	-2.86059	1.84863	9.51533e-05	3.07675	4.62465	3.52303
	pseudo14	193308	193950	86	Pav_sc0001025.1_g390.1.br	hypothetical protein PRUPE_ppb017252mg	1.81311	-3.141	-0.649053	-1.52032	-1.45075	-0.724268	-2.21125	-3.81083	-2.91668	-1.30732	-1.29335	-0.392205	0.000474377	-1.6923	-3.34535	-1.43809
	pseudo15	32543	33195	86	Pav_sc0001142.1_g070.1.br	5'-3' exoribonuclease 3-like, partial	-2.45777	-4.01319	-3.29887	-1.61579	-2.07961	-0.0867565	1.36638	0.320652	-0.41222	-0.136016	-1.17815	1.3536	0.000785799	2.12223	3.72785	3.49917
	pseudo17	983061	983404	86	Pav_sc0001472.1_g040.1.mk	pentatricopeptide repeat-containing protein At3g02650, mitochondrial	-3.30762	-2.99501	-1.51755	0.454822	2.88112	1.72625	2.73622	0.0772116	2.20022	1.57284	1.47727	3.25984	0.000238804	4.38713	4.41878	4.73562
	pseudo18	5276543	5277090	86	Pav_sc0001797.1_g690.1.mk	Unknown	1.31506	-3.03643	1.5047	-0.924879	0.959701	0.391582	-2.06367	-2.62431	-3.45728	1.10868	-0.279357	-0.499246	0.000429795	-0.525931	-3.46764	-0.562834
	pseudo20	719797	719985	86	Pav_sc0002309.1_g230.1.br	hypothetical protein PRUPE_ppa016862mg, partial	-0.13555	-1.30529	-0.173234	1.50833	1.94561	3.46022	1.40952	2.66053	-0.125704	2.19579	-0.566494	-0.611473	0.000164792	3.00721	2.16811	1.42475
	pseudo25	1377776	1378451	86	Pav_sc0010444.1_g020.1.br	hypothetical protein	0.380209	-1.95139	1.67389	-1.78292	-2.80149	-2.69768	-0.0401391	-0.582281	-3.19854	-1.43673	-3.83518	-3.90327	0.000274454	-3.01387	-1.44132	-3.23011
	pseudo4	3228671	3229000	86	Pav_sc0000174.1_g270.1.mk	putative E3 ubiquitin-protein ligase LIN-1	-2.23091	-4.14199	-2.38166	-1.34202	-1.45953	-0.832183	-1.55507	0.15391	-1.73952	-0.909217	0.00168572	1.16633	4.67994e-05	1.5157	1.92473	3.03307
	pseudo1	8117392	8117687	85	Pav_sc0000037.1_g460.1.mk Pav_sc0000037.1_g470.1.mk	peroxisome biogenesis protein 7 abscisic acid receptor PYL12	2.53781	-3.38566	0.658415	0.520791	2.15945	0.615716	0.87128	-0.591285	-1.67665	-3.6839	-4.14063	-1.60557	0.000355753	-0.00901626	-1.41482	-4.01382
	pseudo12	7383099	7383438	85	Pav_sc0000852.1_g510.1.mk	long chain base biosynthesis protein 1	-2.39649	-4.39289	-4.00893	1.13226	-1.19957	-0.446547	1.16311	-1.53566	-2.32979	-1.19169	0.892478	2.32345	2.23687e-05	3.48768	3.21546	4.60648
	pseudo13	2316261	2316580	85	Pav_sc0000893.1_g1060.1.br	Unknown	-3.23551	-3.89199	-2.14217	-0.606877	0.37223	-0.677459	1.1957	-0.0128217	1.25813	0.400368	0.589219	-0.882571	0.000225687	2.68694	3.82593	3.073
	pseudo14	7262322	7262675	85	Pav_sc0001105.1_g290.1.br	Unknown	-2.7183	-4.51061	-3.86517	-3.00979	-2.04264	-3.92648	2.07949	-2.84452	-4.05895	2.45074	-0.498071	3.52481	0.000505075	0.710197	4.06489	6.06341
	pseudo15	8864726	8865007	85	Pav_sc0001267.1_g210.1.br	uncharacterized protein LOC103325210	-1.99212	-2.33095	-1.86461	-0.521417	2.78314	2.1	2.75528	0.288652	1.36182	2.31093	1.29761	-0.231199	0.000227934	4.03342	3.86277	3.51277
	pseudo17	5501673	5501932	85	Pav_sc0001540.1_g300.1.br	Unknown	-1.35305	-1.51548	-1.13116	-0.343759	2.61534	1.89986	0.943347	-1.11521	2.00744	0.125836	2.40533	1.09798	0.00161439	3.15206	2.41889	2.83204
	pseudo18	7958473	7958799	85	Pav_sc0001859.1_g200.1.mk	lisH domain-containing protein C1711.05-like	-4.58356	-2.54103	-1.02382	-0.79421	2.55732	1.3614	1.9184	-0.303612	0.688716	-0.841751	1.67353	2.83893	2.67786e-08	3.67868	3.13637	3.95024
	pseudo18	2409113	2409358	85	Pav_sc0001730.1_g010.1.br	Unknown	-2.47989	-1.0406	-1.38626	0.0918229	-0.19623	2.11252	2.33352	0.900724	1.21974	-2.60492	0.302442	1.61283	0.000304203	2.5793	3.13977	2.08823
	pseudo25	168685	168909	85	Pav_sc0009852.1_g030.1.mk	UPF0481 protein At3g47200-like	-1.11122	-1.84816	-1.65515	1.01907	1.66703	2.57262	0.228952	1.03646	2.40816	0.767848	-1.16066	2.56179	0.00150639	3.39757	3.01119	2.92824
	pseudo3	4256848	4257424	85	Pav_sc0000111.1_g120.1.mk	hypothetical protein PRUPE_ppa002593mg	-2.10736	-5.84319	-3.81181	1.11319	-1.92911	0.947332	-0.316383	-3.01385	-2.5906	-0.988449	-4.03799	-1.5131	8.6724e-05	3.76309	1.76888	1.51295
	pseudo8	1699648	1699887	85	Pav_sc0000480.1_g160.1.mk	helicase protein MOM1-like	-0.959363	-1.94775	-1.2594	-0.772911	1.08089	-1.09863	3.13008	-3.98219	0.655809	2.1561	2.55746	3.64246	1.44434e-05	1.41092	3.12518	4.26052
	pseudo8	9737024	9737760	85	Pav_sc0000543.1_g150.1.br	Unknown	-2.88896	-4.65301	-3.55047	-4.09973	-4.49036	-2.30914	0.147329	-2.4969	-2.82581	-4.31311	-1.20722	1.6937	0.000116049	0.227849	2.45456	3.8375
	pseudo8	2337528	2337922	85	Pav_sc0000481.1_g030.1.mk	WPP domain-associated protein	-2.18345	-4.13808	-3.5391	-1.85953	-0.203481	-1.34619	0.829903	-0.833781	-0.1466	-2.12164	-3.65491	1.03935	5.13796e-08	2.08253	3.15897	2.7036
	pseudo10	5087812	5088265	84	Pav_sc0000638.1_g130.1.mk	cell division control protein 6 homolog	-3.67037	-3.2441	-2.57601	-1.16475	0.078006	-1.27111	0.983889	-1.08903	-0.0901432	0.276479	-1.34536	-0.334626	0.000353192	2.44527	3.26735	2.76891
	pseudo10	7634154	7634497	84	Pav_sc0000659.1_g420.1.mk	Unknown	-2.17708	-3.78481	-3.28976	-0.359066	-2.52448	-1.57479	0.615776	-1.56595	-0.464069	1.11423	1.3443	-3.2089	0.000422255	1.70311	2.71245	3.60332
	pseudo11	2048626	2048892	84	Pav_sc0000700.1_g1450.1.mk	protein MON2 homolog	-2.33092	-1.29998	-3.19833	1.66154	0.24185	0.329108	1.1487	-0.289397	-1.93628	1.80645	-0.245608	0.495077	1.07967e-08	2.97236	2.20735	3.01007
	pseudo12	9322507	9322753	84	Pav_sc0000869.1_g340.1.br	hypothetical protein PRUPE_ppa027069mg	-0.424959	-0.974488	-2.22015	2.15057	1.78591	2.90628	1.40505	0.580674	-0.999812	-0.108521	0.87565	2.68855	6.76244e-05	3.38923	1.66109	2.64881
	pseudo13	7638699	7638896	84	Pav_sc0000984.1_g080.1.br	probable leucine-rich repeat receptor-like serine/threonine-protein kinase At3g14840	-1.3657	-4.38588	-4.39222	-3.80069	-3.38619	2.93568	-4.35403	2.00625	3.20972	-4.3795	-4.45421	2.28196	3.83045e-05	4.01531	4.78371	3.35789
	pseudo16	10477860	10478183	84	Pav_sc0001444.1_g210.1.mk	F-box/kelch-repeat protein SKIP25-like	-2.78027	-2.4333	-2.84431	-0.646059	-1.91355	1.49776	0.314944	-3.30785	0.743687	1.90857	-0.278988	-0.809277	0.00088342	2.98802	2.68368	3.45377
	pseudo17	5523117	5523347	84	Pav_sc0001540.1_g340.1.mk	uncharacterized protein LOC103322143 isoform X1	-1.55388	-6.21927	-2.26497	-5.02911	0.374837	1.89543	-5.28027	-5.04858	2.75074	-4.81987	-3.46336	0.993436	0.000269956	3.16679	3.59386	1.91319
	pseudo18	3094675	3094972	84	Pav_sc0001748.1_g120.1.mk Pav_sc0001748.1_g130.1.mk	prefoldin subunit 6-like nudix hydrolase 3	-0.526273	-5.8185	-4.26553	2.49997	-2.6454	-0.7377	-0.835357	-4.3782	-1.40225	-1.64938	2.01093	-1.39477	4.45621e-05	3.06998	0.369177	2.62993
	pseudo19	9541382	9541608	84	Pav_sc0002237.1_g030.1.br	disease resistance protein RPM1-like	-2.54796	-0.123326	-0.917579	-0.323273	-0.389776	2.36871	2.03162	0.203783	3.91365	2.95102	3.43799	3.80186	3.91893e-10	2.05541	3.64955	4.32852
	pseudo19	10224361	10224583	84	Pav_sc0002266.1_g180.1.br	Unknown	0.108545	-3.62105	-5.12444	-1.32152	-1.61603	3.49977	1.46165	0.781747	-1.1698	3.07789	3.00133	4.41017	5.5653e-09	3.34092	2.04942	4.98834
	pseudo20	8880518	8880972	84	Pav_sc0002584.1_g430.1.br	hypothetical protein PRUPE_ppb013974mg	1.77375	-1.2414	0.846591	-3.31954	-3.3844	-2.45094	-1.51447	-1.64424	0.297451	0.0618107	-1.44137	-0.548566	0.000973895	-3.89627	-1.57068	-1.42843
	pseudo21	3795387	3795598	84	Pav_sc0002858.1_g150.1.mk	Unknown	-1.24282	-3.05461	-1.82756	2.61005	-0.794304	-0.431291	1.70679	-1.3789	1.34482	0.0757553	-1.73224	0.419187	0.00060296	3.17025	2.90783	1.70687
	pseudo21	4549950	4550717	84	Pav_sc0002870.1_g120.1.br	Unknown	-1.60935	-3.79178	-2.70405	0.242943	0.150741	-0.608503	0.141294	-1.53114	-1.63694	1.68851	0.794181	-0.634699	0.00048623	2.41401	1.67768	3.33936
	pseudo22	1068118	1068401	84	Pav_sc0003383.1_g100.1.br	Unknown	-0.346812	-1.48337	-3.14759	0.990729	1.68332	1.69519	2.06611	1.53484	1.53381	2.58481	1.41123	2.27294	0.000232306	2.74696	2.98935	3.42426
	pseudo23	9767079	9767398	84	Pav_sc0006048.1_g060.1.mk	F-box protein CPR30-like	-2.06519	-3.1321	-2.85197	-0.0947081	1.15021	1.31325	0.387144	-3.27178	0.783887	0.121852	-1.62594	-0.0736693	0.00147953	3.52059	2.67225	2.26488
	pseudo23	6978426	6978700	84	Pav_sc0005522.1_g020.1.br	Unknown	-2.43712	-3.67609	-4.80058	-3.36874	-1.15766	0.431382	-2.81917	2.26854	0.992484	0.649642	0.664314	3.33303	1.05984e-05	2.66402	4.53985	5.46875
	pseudo23	9321171	9321611	84	Pav_sc0006005.1_g010.1.br	Unknown	-3.90128	-2.08375	-1.37166	-2.89537	-2.17464	2.72049	-0.724209	1.89201	-2.45213	-1.41558	-0.344004	-5.26329	0.00020197	3.33321	2.70664	0.786294
	pseudo4	6492093	6492467	84	Pav_sc0000195.1_g280.1.br Pav_sc0000195.1_g290.1.br	premnaspirodiene oxygenase-like Unknown	-4.16238	0.397215	-3.73151	-1.13387	2.15134	3.23119	0.573523	-2.09512	0.329545	1.659	2.93734	1.01194	7.55398e-05	3.30263	1.04059	3.14781
	pseudo5	6592999	6593301	84	Pav_sc0000257.1_g620.1.mk	serine/threonine-protein kinase PEPKR2	0.358647	-1.33077	-3.08868	1.64439	2.99172	1.66495	2.45024	0.0687173	2.45267	1.36553	2.38349	2.94691	3.59833e-05	2.98718	2.73769	3.10887
	pseudo7	1919182	1919440	84	Pav_sc0000383.1_g820.1.mk	hypothetical protein PRUPE_ppa005259mg	-2.68001	-5.04763	-5.49354	-5.32369	2.12596	0.965276	0.494498	-3.86749	0.74753	2.42246	-0.944344	-4.15843	7.95888e-05	4.92709	3.92029	4.83169
	pseudo8	6498736	6498921	84	Pav_sc0000502.1_g620.1.br	anthocyanidin 5,3-O-glucosyltransferase-like	-1.60838	0.644754	-0.853067	2.7302	1.54768	3.59645	-0.0899717	1.22265	3.4841	0.525495	-2.50128	2.72829	0.000150752	3.14676	2.56443	1.75326
	pseudo9	8431577	8431992	84	Pav_sc0000588.1_g160.1.mk	cytochrome P450 CYP749A22-like	-2.88882	-3.0874	-3.25414	1.3826	-1.26902	-0.422708	-1.42969	-0.536921	-3.69678	-1.22195	0.00305545	-0.23437	4.35773e-11	3.39801	1.67003	2.67367
	pseudo1	5695840	5696127	83	Pav_sc0000028.1_g670.1.mk	zinc finger BED domain-containing protein RICESLEEPER 2-like	-3.18614	-0.512895	-1.52908	-1.68979	0.061088	-1.47962	2.65195	-1.06838	1.367	2.13371	-1.48141	-0.366139	1.77762e-05	0.564904	3.01302	2.25469
	pseudo11	9624811	9625101	83	Pav_sc0000762.1_g130.1.mk	acyl-CoA-binding domain-containing protein 4 isoform X1	-2.23596	-0.999613	-2.42146	-0.0722818	1.88274	2.23983	1.38059	1.48287	1.09356	-0.532486	0.194275	2.19943	2.04909e-08	3.38034	3.06666	2.83795
	pseudo11	2976463	2976752	83	Pav_sc0000704.1_g640.1.mk	H/ACA ribonucleoprotein complex, subunit Nhp2, eukaryote, partial	-0.435024	-2.50981	-2.37023	1.8485	2.6058	-1.94146	1.95439	0.186704	0.894352	1.60149	-1.30857	-0.506566	3.42594e-05	3.1657	2.63199	1.90155
	pseudo12	10019642	10020139	83	Pav_sc0000877.1_g580.1.br	glutathione S-transferase U9-like	-2.03764	-3.77233	-2.36504	1.02857	-1.79154	-0.982463	-1.10954	-0.827928	-0.481198	1.06115	0.776044	1.0565	0.000872228	2.47234	1.77071	3.52455
	pseudo13	5102146	5102794	83	Pav_sc0000937.1_g060.1.br	hypothetical protein PRUPE_ppb019070mg	-2.18711	-5.28247	-2.82435	2.09568	0.853898	1.30325	-0.416279	-0.656408	0.62861	0.231596	-0.0612898	-0.207239	4.72571e-09	4.46742	2.92242	2.95593
	pseudo17	7108586	7109196	83	Pav_sc0001580.1_g340.1.br	Unknown	-1.92552	-4.71623	-2.29797	-0.879819	-0.860745	-1.40335	0.37775	0.554523	1.30599	1.11387	-2.67563	-1.27877	0.000417381	1.54461	3.37639	2.43712
	pseudo19	8585367	8585991	83	Pav_sc0002208.1_g820.1.mk	glucose-1-phosphate adenylyltransferase large subunit, chloroplastic/amyloplastic isoform X1	-0.610419	-4.30773	-2.92095	1.8629	0.600886	-1.82717	2.82211	-0.885833	0.300034	0.157616	2.39939	1.61562	0.000163768	2.69828	3.40051	3.49695
	pseudo19	5953875	5954136	83	Pav_sc0002141.1_g040.1.br	uncharacterized protein LOC103327531	0.102373	-0.370391	-2.28257	2.08317	2.14959	-0.147374	0.549901	1.1497	1.07102	2.77882	2.69393	2.26628	0.000475524	2.22213	1.49448	3.14397
	pseudo2	3016861	3017187	83	Pav_sc0000065.1_g060.1.mk	pentatricopeptide repeat-containing protein At3g06430, chloroplastic	-2.76226	-2.94148	-1.18296	0.46618	1.51111	0.039889	1.48593	-2.13801	-1.03351	1.61122	0.0961853	2.5206	0.000162445	2.87292	2.29213	3.77984
	pseudo2	880384	880594	83	Pav_sc0000052.1_g770.1.br	proline-rich receptor-like protein kinase PERK2	-0.524928	-1.19228	-2.9715	-0.247085	-0.0872111	1.31852	2.72959	1.86352	2.71642	2.08486	-0.485955	2.09418	3.84e-10	1.76341	3.74063	2.8722
	pseudo20	11037053	11037471	83	Pav_sc0002686.1_g010.1.br	trans-Golgi network integral membrane protein 2-like isoform X1	-3.54314	-4.50666	-4.32385	-4.98676	1.17842	1.3634	-3.27176	-4.09115	0.796977	2.6157	-1.88599	-3.13455	6.44547e-05	4.75952	3.40202	5.17973
	pseudo20	6265806	6266341	83	Pav_sc0002474.1_g340.1.br	zinc finger BED domain-containing protein RICESLEEPER 2-like	-1.19404	-3.24537	-2.20931	2.42022	0.765978	0.758795	0.86776	0.661253	0.189147	-1.21955	-0.455392	1.30728	0.000539108	3.52676	2.58299	2.25963
	pseudo24	553329	553780	83	Pav_sc0006298.1_g120.1.mk	probable LRR receptor-like serine/threonine-protein kinase At3g47570	-1.92495	-3.00734	-1.32469	-1.72304	0.777888	-1.60592	1.06881	-1.97978	-1.86938	1.02761	0.639153	2.08364	0.000514163	1.57589	1.73793	3.31556
	pseudo9	7921700	7921932	83	Pav_sc0000586.1_g330.1.mk	alkaline/neutral invertase CINV2-like	-2.0734	-4.75237	-2.04972	-0.213611	0.435534	1.40512	2.61456	-2.85549	-3.96875	-0.554754	0.581842	1.3623	0.000134663	3.23581	3.6153	3.20137
	pseudo9	6328869	6329227	83	Pav_sc0000582.1_g530.1.br	uncharacterized protein LOC103435714	-2.14192	-2.11959	-2.81537	-0.629577	0.274062	-0.391853	0.900113	1.69098	0.986803	-2.17868	-1.31745	1.43904	0.000275958	2.12827	3.56305	2.47701
	pseudo1	854843	856111	82	Pav_sc0000008.1_g090.1.br Pav_sc0000008.1_g100.1.br	hypothetical protein PRUPE_ppa017789mg heat shock protein 81-1-like	0.829058	-4.17441	-1.47723	-2.41364	-0.428287	-2.36388	-3.20403	-3.77096	-3.82609	-2.93544	-1.21292	1.26211	0.00110929	-0.961602	-3.11857	0.434235
	pseudo11	5616190	5616524	82	Pav_sc0000732.1_g060.1.mk	RING-H2 finger protein ATL7-like	-1.66224	-0.714128	-2.40375	1.0399	-0.651709	0.497048	-0.530352	-0.118757	0.537942	0.276305	1.43851	2.67256	0.000253499	1.88062	1.45962	3.20777
	pseudo11	2811788	2812134	82	Pav_sc0000704.1_g280.1.mk	uncharacterized protein LOC103341015	-0.613518	-3.60461	1.72782	-1.05033	-2.29086	-1.04765	-3.42534	-0.546824	-0.702585	-2.75136	-4.53303	-2.40841	0.0016413	-1.78954	-1.54	-3.41291
	pseudo12	3692171	3692582	82	Pav_sc0000823.1_g300.1.br	Unknown	-0.822578	0.775638	1.0411	-2.16778	-1.0028	1.20627	-0.558434	1.70561	0.692253	-2.6421	-5.81991	-1.51653	2.11102e-05	-0.517254	0.358086	-3.03906
	pseudo13	3245870	3246081	82	Pav_sc0000908.1_g210.1.mk	TMV resistance protein N-like	-3.19309	-3.71301	-4.1699	-4.60166	-1.71668	0.88327	0.852474	-3.12622	1.51874	1.55479	-1.96163	-2.42504	8.1342e-07	3.1829	4.31066	3.80936
	pseudo16	10988156	10988323	82	Pav_sc0001454.1_g370.1.br	DNA repair protein XRCC3 homolog	-2.55986	-2.27444	-2.74914	-2.81749	0.77667	2.44784	2.08507	-0.965725	3.01586	2.72053	0.815653	2.61561	1.02572e-07	3.79962	4.6125	4.78554
	pseudo17	418347	419269	82	Pav_sc0001461.1_g520.1.mk Pav_sc0001461.1_g530.1.mk	UDP-galactose/UDP-glucose transporter 4-like UDP-galactose/UDP-glucose transporter 4-like	-2.66795	-2.02216	-4.59811	0.817703	0.349501	0.598258	0.742081	-2.40399	-0.689406	1.31985	-1.1678	0.656284	0.000651395	3.35474	2.47997	3.34421
	pseudo18	7509069	7509308	82	Pav_sc0001837.1_g030.1.br	Unknown	-1.12138	-3.90713	-2.83783	-2.45074	-2.70695	0.145032	0.476117	0.309457	1.85981	-0.306901	-0.103703	-1.67458	9.40958e-05	1.11391	3.23214	1.62323
	pseudo18	8550667	8550907	82	Pav_sc0001869.1_g210.1.br	Unknown	-3.6372	-3.40998	-1.4968	1.13018	-3.94567	-2.38135	2.50337	0.117658	2.22765	1.33411	-3.67889	-0.419438	3.2722e-08	2.20948	4.4351	2.66211
	pseudo23	1085915	1086052	82	Pav_sc0004477.1_g020.1.mk	histidinol-phosphate aminotransferase, chloroplastic-like	-1.4897	-2.33357	-1.95597	-1.82631	1.35045	1.52112	1.51949	2.73156	0.709011	-2.25075	-3.22482	2.28434	2.78917e-05	2.81152	3.77815	2.67536
	pseudo23	8656148	8656675	82	Pav_sc0005841.1_g020.1.mk	hypothetical protein L484_013000	-3.36362	-1.29449	-2.68722	-0.166261	1.89465	0.184712	1.03783	0.760084	-0.205571	-1.81383	-0.667334	-2.8143	5.63981e-05	3.12183	2.80525	0.678245
	pseudo24	9958600	9959156	82	Pav_sc0009270.1_g020.1.br	Unknown	0.198209	1.48496	0.701996	-2.15701	-4.20028	-0.339609	0.789284	0.461203	2.02308	-2.56528	-2.09299	-1.90373	0.000556855	-2.3824	0.363368	-3.05496
	pseudo24	4742041	4742921	82	Pav_sc0007311.1_g010.1.mk	tubulin-folding cofactor C	-2.13118	-3.60325	-3.46252	-2.04713	-2.52149	0.460786	1.46919	-2.20205	-1.20773	-1.9127	-3.77783	-1.35199	0.00111261	2.15926	3.0909	0.863822
	pseudo4	2624316	2624525	82	Pav_sc0000167.1_g040.1.br Pav_sc0000167.1_g050.1.br	LOW QUALITY PROTEIN: probable alpha-mannosidase I MNS4 TMV resistance protein N-like	-1.16448	-5.45692	-6.07953	-1.57008	-2.58968	1.85512	0.180795	1.30534	0.409886	0.663218	-0.192921	2.62724	-8.54866e-13	3.09078	3.3505	4.15839
	pseudo4	9331442	9332079	82	Pav_sc0000207.1_g1330.1.mk	mitochondrial alternative oxidase	-2.81881	-4.22119	-3.78862	-0.185623	0.96887	0.780565	-0.894047	-3.06524	-1.84951	-1.89578	-3.00153	-0.60431	9.89793e-05	4.08853	1.80441	1.97357
	pseudo4	459568	459773	82	Pav_sc0000148.1_g080.1.br	Unknown	-0.509034	-0.72021	-1.57829	-0.240092	3.18206	3.83062	1.99527	-0.840453	3.69758	3.36838	3.07727	-0.666382	7.44982e-05	3.87625	3.41318	3.56008
	pseudo4	7539385	7539968	82	Pav_sc0000201.1_g330.1.br	Unknown	1.13031	1.88502	2.61156	-2.59099	-1.46084	-0.0818148	1.52531	1.20266	2.56309	2.19737	2.09576	1.95273	0.000205727	-3.02442	-0.11311	0.0861159
	pseudo6	844598	844836	82	Pav_sc0000305.1_g120.1.mk	protein N-terminal asparagine amidohydrolase-like	-0.677428	-0.795151	-4.43049	0.803554	-4.05142	-3.55562	1.13265	-0.445349	3.07585	2.05088	1.47446	2.31208	0.000205104	0.599415	3.1862	3.25193
	pseudo8	458957	459194	82	Pav_sc0000467.1_g690.1.mk	vacuolar protein sorting-associated protein 41 homolog	-0.798921	1.9423	2.96612	-0.033928	-0.431625	0.877426	0.413674	2.34689	0.899613	-2.26573	-1.24356	-1.32997	3.82404e-06	-1.78266	-0.562138	-3.57271
	pseudo10	2353711	2353995	81	Pav_sc0000622.1_g890.1.br	Unknown	-3.33424	-2.69475	-2.35558	-0.968202	1.32095	-1.01604	-2.02765	1.20191	1.69953	0.31004	-2.7697	-0.581157	0.000611638	2.9642	3.68971	2.19423
	pseudo11	6331381	6331604	81	Pav_sc0000740.1_g010.1.br	Unknown	-1.28927	-2.08384	-3.56492	0.315895	0.56365	2.28604	0.840188	1.63737	1.00411	0.994734	1.52581	-1.26073	6.14677e-06	3.38093	3.24299	2.85808
	pseudo13	464386	464716	81	Pav_sc0000886.1_g420.1.mk	phosphoglycerate mutase-like protein AT74H	-5.08714	-6.1089	-3.02751	-3.589	-5.02377	1.3374	2.57953	0.83615	-0.827715	-0.630471	0.106734	-4.15077	1.45829e-07	3.98698	5.64365	3.41711
	pseudo13	4333605	4333925	81	Pav_sc0000911.1_g170.1.br	uncharacterized protein LOC103428714	-1.50519	-2.19934	-3.06532	-4.15758	-2.37585	2.73795	0.0363434	2.17365	0.365232	-0.3583	1.44078	1.23054	0.000183004	3.32716	3.30728	3.08269
	pseudo14	10280438	10280732	81	Pav_sc0001132.1_g070.1.br	Unknown	-2.35269	-2.0319	-1.62413	-3.71575	0.20472	2.46605	-1.16722	1.66382	3.48105	-0.129905	-3.13621	2.36852	0.000342594	3.14271	4.27257	3.01734
	pseudo16	9501945	9502230	81	Pav_sc0001422.1_g170.1.mk	pentatricopeptide repeat-containing protein At1g08070-like	0.445148	-0.753994	-4.30968	1.08172	0.907219	0.486335	-0.788911	0.367773	2.3534	2.74697	1.88979	2.601	0.00123764	1.42757	1.79962	3.03968
	pseudo2	7940046	7940638	81	Pav_sc0000091.1_g290.1.mk	histidine kinase 3	-1.99372	-3.15723	-2.40382	0.429395	-1.18734	0.496046	0.115788	0.792231	0.732585	1.66352	0.0317201	1.80657	0.00011575	2.5332	3.01939	3.79952
	pseudo20	8803004	8803249	81	Pav_sc0002584.1_g320.1.mk	probable beta-1,3-galactosyltransferase 19	-2.07127	-3.95673	-3.17473	0.580621	0.832213	0.313475	-3.37069	1.23923	0.257646	-2.44584	1.0957	-0.0216728	0.000101315	3.45133	3.14451	3.00046
	pseudo21	1166853	1167063	81	Pav_sc0002747.1_g010.1.br	hypothetical protein VITISV_041812	-0.0880297	-0.403426	-1.86793	2.06309	2.55706	2.46368	-0.550713	3.49465	3.54976	-0.41138	-0.336404	3.2364	0.000321033	2.98283	3.58589	2.47646
	pseudo21	2159733	2160219	81	Pav_sc0002793.1_g060.1.br	uncharacterized protein DDB_G0271670-like	-3.49538	-2.45789	-1.21789	0.783539	1.0761	1.57742	-2.20827	1.31058	-2.46026	0.342303	-1.72643	-1.14282	0.000735871	3.28186	2.03868	1.52973
	pseudo22	10614633	10614917	81	Pav_sc0004348.1_g120.1.br	hypothetical protein PRUPE_ppa018392mg, partial	0.128346	-2.52191	-1.30571	2.20561	2.2176	2.37041	0.945042	1.69158	-1.60159	2.3815	2.0113	1.86725	0.000130349	3.11018	1.71416	2.94696
	pseudo22	5537240	5537738	81	Pav_sc0003756.1_g050.1.mk	TMV resistance protein N-like, partial	-0.434826	-3.25621	-2.96986	-0.375204	-0.318749	1.65749	1.08276	-1.9779	1.46336	1.62668	-0.900517	3.2636	0.000763826	2.2819	2.39965	3.76632
	pseudo4	3982744	3982959	81	Pav_sc0000174.1_g1780.1.br	monoacylglycerol lipase ABHD6	-1.55017	-3.87165	-1.32744	2.0821	-3.01271	3.10562	0.7201	-0.426501	1.37993	2.06433	1.21673	2.52059	0.000231416	4.00375	2.62728	3.9212
	pseudo5	1304096	1304475	81	Pav_sc0000220.1_g850.1.mk	hypothetical protein PRUPE_ppb017081mg, partial	-3.14662	-3.33567	-2.64247	-1.8964	-0.799681	-2.8484	1.5387	1.13597	2.41122	0.228139	0.921325	1.06071	0.000101668	1.39984	4.80773	3.79103
	pseudo6	9049123	9049455	81	Pav_sc0000363.1_g680.1.mk	GDSL esterase/lipase At5g03610-like	-1.23765	-3.42603	-3.41675	-0.13523	0.170867	2.10711	1.68652	-1.6915	-2.06034	0.601074	-2.15645	-2.27597	4.21533e-05	3.37688	2.62523	1.67309
	pseudo7	10526663	10526875	81	Pav_sc0000465.1_g890.1.br	hypothetical protein PRUPE_ppa024392mg	-2.82797	-0.718613	-2.48989	-0.52885	0.0480451	2.67377	-1.16879	0.102739	2.59294	-0.149484	2.33235	-0.230627	0.000612908	3.12942	3.02692	2.87352
	pseudo8	9176242	9176476	81	Pav_sc0000537.1_g030.1.br	Unknown	0.126764	-0.890801	-1.89018	-0.010978	-1.67672	2.05848	2.14421	0.141595	1.16512	3.15811	2.05622	1.29528	1.44725e-05	1.52502	2.03049	3.03119
	pseudo9	8391970	8392257	81	Pav_sc0000588.1_g160.1.mk	cytochrome P450 CYP749A22-like	-2.48278	-1.89537	-2.63023	0.0837102	1.00476	-1.63333	2.73433	-0.437403	-2.46228	-0.324185	0.991516	0.911466	4.35773e-11	2.47569	3.63609	2.93776
	pseudo18	27204	27484	80	Pav_sc0001699.1_g110.1.mk	pentatricopeptide repeat-containing protein At4g38150-like	1.39748	1.97167	1.73356	-2.42864	-0.579009	-1.75718	-0.386193	0.93511	-2.98573	-1.90892	0.607498	-3.21882	0.000298906	-3.10194	-1.81763	-2.38086
	pseudo18	1221117	1221302	80	Pav_sc0001710.1_g980.1.mk	uncharacterized protein LOC103327949	-1.5253	-1.92058	-2.05574	2.13522	2.21388	-1.83716	2.21871	-1.48526	2.7912	2.92915	3.35229	-0.545669	2.58584e-06	3.45005	3.80795	4.44151
	pseudo19	2275328	2275570	80	Pav_sc0001990.1_g200.1.br	Unknown	-1.21203	0.540956	-0.759127	-0.441239	3.10859	3.85144	2.9979	3.73425	3.55022	4.3283	3.01566	3.59665	2.16775e-05	3.26381	3.73602	4.0229
	pseudo19	6307289	6307408	80	Pav_sc0002156.1_g020.1.br	uncharacterized protein LOC103329348	0.205327	0.00672803	0.11692	2.37226	2.01165	2.33818	1.49712	0.10341	1.59413	2.27733	3.81818	3.52487	0.000656353	2.13767	1.09308	3.23212
	pseudo2	3480925	3481178	80	Pav_sc0000065.1_g650.1.br Pav_sc0000065.1_g660.1.mk	Unknown clustered mitochondria protein homolog	-1.43407	-5.24787	-4.72318	-5.3624	-2.74761	1.59228	1.73978	2.19318	0.597595	-5.18394	3.31961	-0.707674	1.65861e-06	2.87622	4.44003	4.61259
	pseudo20	8578258	8578527	80	Pav_sc0002575.1_g090.1.mk	hypothetical protein PRUPE_ppa022854mg	-0.972259	1.48514	-2.2725	-0.20214	-0.660402	0.327026	-0.625681	0.0317337	-0.305079	-2.36331	-3.3175	-3.27628	0.000139187	-0.351204	-0.503787	-3.14362
	pseudo21	7192545	7192826	80	Pav_sc0003043.1_g130.1.mk	DELLA protein RGL1-like	-1.74011	-3.51167	-2.51078	1.17785	0.641307	0.835655	1.54886	-2.18515	-0.427947	1.19081	-0.901849	-0.0282285	2.21317e-09	3.31729	2.78953	2.75559
	pseudo22	6784757	6785254	80	Pav_sc0003851.1_g050.1.mk Pav_sc0003851.1_g060.1.br	ubiquitin fusion degradation protein 1 homolog putative ribonuclease H protein At1g65750	-0.958598	-1.86062	-2.21268	0.371287	2.54676	0.599462	-0.214268	-0.18671	-1.17014	-1.93171	-0.548085	-2.8349	0.00154819	3.10488	1.11949	0.111166
	pseudo24	7571326	7571763	80	Pav_sc0008300.1_g030.1.br	putative transposase tnp2	-1.9366	-1.39409	-3.64906	0.760686	0.702116	2.35381	1.77212	-4.82715	3.24489	-0.624965	0.33164	1.04284	0.00123755	3.5471	4.16381	2.45918
	pseudo3	7439778	7439995	80	Pav_sc0000129.1_g1410.1.br	Unknown	-3.16348	-2.8676	-3.24571	-3.96778	-3.58916	1.91721	2.45611	-1.07109	1.87826	2.22319	-2.10155	-3.83917	6.2038e-10	3.47027	4.76696	3.81184
	pseudo4	4348527	4348806	80	Pav_sc0000175.1_g520.1.mk	cytochrome P450 84A1-like	-3.06457	-5.83153	-1.051	-0.299076	-2.75812	2.5919	1.37029	-3.95842	0.797706	2.23299	-2.98547	2.55558	5.99295e-05	3.4955	2.82383	4.1107
	pseudo6	2337172	2337473	80	Pav_sc0000317.1_g080.1.br	Unknown	-0.933223	-1.23768	-1.04018	-4.81807	1.02874	1.23111	1.01675	-0.945691	3.49029	2.47341	0.613562	1.78651	0.000258827	1.62503	3.26449	2.87684
	pseudo7	10289848	10290178	80	Pav_sc0000465.1_g260.1.br	tyrosine-sulfated glycopeptide receptor 1-like	-1.65094	-0.933839	-2.52971	1.88333	2.19935	1.30107	1.09404	0.344174	1.24381	0.469405	0.817306	0.523638	0.000304446	3.40416	2.50758	2.1751
	pseudo9	8500785	8501127	80	Pav_sc0000588.1_g250.1.mk	uncharacterized protein LOC103416473	-1.5667	-5.14077	-2.25281	-0.165258	0.103659	2.41685	0.694843	0.235758	-1.66657	-1.26441	0.247601	-0.561966	0.000264723	3.66565	2.434	1.9861
	pseudo1	372150	372781	79	Pav_sc0000003.1_g130.1.mk	uncharacterized protein LOC103328285	-2.88248	-4.12704	-3.78456	1.19366	-0.208159	0.607026	1.57057	-2.79766	-1.45367	0.553755	1.12122	0.962754	0.000154349	4.13902	3.71245	4.39715
	pseudo1	10011065	10011308	79	Pav_sc0000044.1_g850.1.mk	UPF0183 protein At3g51130	1.05669	0.0893428	1.5332	-2.20794	-2.51969	-3.2441	1.57125	-0.0384272	0.276556	1.00594	-2.37988	1.83054	8.74129e-05	-3.60466	-0.227716	-0.0688071
	pseudo10	7213540	7213722	79	Pav_sc0000658.1_g020.1.br	uncharacterized protein LOC103948804	-3.07168	-1.74527	-3.36792	-3.17076	-3.30218	-3.02443	-3.04006	2.30207	0.554326	2.84888	3.53808	2.40471	0.000174532	-0.616432	3.66518	5.55185
	pseudo10	2914698	2914945	79	Pav_sc0000624.1_g980.1.br	uncharacterized protein LOC103959296	-1.00712	-2.14818	-0.951408	1.11533	3.12081	2.06161	0.513247	-2.63781	2.21612	1.01785	2.62091	2.13228	0.000678582	3.60006	2.3296	3.34016
	pseudo11	3790583	3790866	79	Pav_sc0000714.1_g010.1.mk	strictosidine synthase 1-like	-3.91547	-5.86218	-1.71132	-0.409056	-1.542	1.21831	0.00358691	1.4483	0.323095	-0.757096	-1.16142	0.276792	1.57053e-07	3.13812	3.67957	2.53283
	pseudo12	9069781	9070819	79	Pav_sc0000866.1_g290.1.mk	17.6 kDa class I heat shock protein 1-like	-1.86349	-2.04004	-3.34235	-0.754805	-1.49588	-2.10006	0.302992	0.428722	-0.153194	0.199892	-0.364505	1.98045	2.82582e-05	0.937008	2.49636	3.25142
	pseudo12	5313101	5313398	79	Pav_sc0000832.1_g470.1.mk	Unknown	-3.10817	-2.9173	-3.46489	-0.169515	-0.962408	1.59395	0.0191018	-2.98766	-0.653693	-0.0968268	-3.3529	0.326166	0.000250856	3.70542	2.38889	2.75425
	pseudo15	2343232	2343727	79	Pav_sc0001183.1_g300.1.br	putative pentatricopeptide repeat-containing protein At3g49142	-3.07407	-2.12601	-3.13229	-0.291383	-2.45785	-2.93792	0.987981	-0.399792	-4.53974	-4.36545	-0.443196	1.62733	0.000569242	1.29025	2.59175	3.06801
	pseudo17	3254862	3255042	79	Pav_sc0001508.1_g040.1.mk	protein DOWNSTREAM OF FLC-like	-1.16693	-5.71413	-4.90385	-5.4641	2.51655	-1.96048	-0.0138457	0.0354282	-0.630682	2.28641	-1.66952	2.59817	-5.53338e-13	3.59168	2.41836	4.49789
	pseudo18	5360312	5360793	79	Pav_sc0001801.1_g100.1.mk	uncharacterized protein LOC103327943 isoform X1	-1.03829	-2.16788	-1.45701	2.37567	1.24132	2.03175	-0.815279	-0.532461	1.37407	0.314379	-0.78832	-1.15059	0.00139398	3.4388	1.84291	1.08198
	pseudo19	10436093	10436359	79	Pav_sc0002271.1_g060.1.mk	embryogenesis-associated protein EMB8	-0.666625	-0.0791606	-2.74365	0.223878	0.232108	0.848821	2.84786	-3.02919	0.459451	0.449231	1.02449	3.57306	0.000102973	1.26349	2.33315	3.14821
	pseudo2	7472096	7472393	79	Pav_sc0000087.1_g330.1.mk	pentatricopeptide repeat-containing protein At4g11690	-2.99772	-3.02306	-2.19118	0.919678	2.3332	-1.8956	2.68472	0.380089	2.70412	0.984131	0.856893	-0.820767	0.000363389	3.94586	4.93058	3.22073
	pseudo2	7880049	7880291	79	Pav_sc0000091.1_g180.1.mk	unnamed protein product	-1.96599	-3.24077	-4.39061	-0.788804	-3.77925	-1.71547	-1.40857	0.479945	-1.04675	-0.694984	1.15233	1.46794	3.96655e-05	1.22365	2.46173	3.77548
	pseudo20	3302664	3302982	79	Pav_sc0002360.1_g1030.1.mk	hypothetical protein PRUPE_ppa025799mg	-2.8371	-3.72622	-4.31228	-0.216799	0.520158	0.684755	0.261148	-3.05457	-1.93669	-1.89072	-5.74724	0.881324	0.000139118	3.8756	2.57131	3.00247
	pseudo21	9648233	9648437	79	Pav_sc0003169.1_g070.1.mk	probable LRR receptor-like serine/threonine-protein kinase At1g67720	-6.64386	-6.64386	-6.64386	-6.64386	-6.64386	-6.64386	-0.0634511	-3.22936	4.14222	-4.12559	-3.39362	-3.31471	-4.5966e-13	0	9.28549	3.07578
	pseudo21	8539328	8539681	79	Pav_sc0003121.1_g030.1.br	Tag=/pseudo	-2.26977	-2.33932	-2.11298	-1.09718	-2.19793	1.58625	1.38036	-2.62757	1.26628	-2.69127	-1.6807	-2.19048	9.22146e-06	2.53545	3.02291	0.108531
	pseudo22	4862836	4863043	79	Pav_sc0003700.1_g030.1.br	Unknown	-3.45037	-3.10551	-4.10499	-1.92187	-0.509613	0.701428	-0.300606	-3.53323	2.56498	0.804427	-1.19308	1.63343	4.64576e-06	3.28601	4.68057	4.31396
	pseudo23	9836785	9837023	79	Pav_sc0006059.1_g020.1.br	Unknown	-4.0292	-0.892698	-1.64622	-1.54549	1.19034	1.02836	0.461358	-1.22654	2.55696	0.534584	-1.5191	-2.4516	2.14544e-05	2.34302	3.06411	1.10702
	pseudo24	2387131	2387402	79	Pav_sc0006734.1_g100.1.br	Unknown	0.341652	0.153412	2.14626	-1.06719	-1.18677	-0.131406	1.40366	-2.975	-0.427573	-0.872506	-3.31582	-4.55561	0.000831633	-1.89542	-0.952744	-3.30397
	pseudo4	9007262	9007544	79	Pav_sc0000207.1_g760.1.br	alpha-glucan phosphorylase, H isozyme-like	-1.2995	-4.01622	-0.955507	-1.737	2.39037	1.79653	2.93024	1.04662	1.37422	2.236	-0.380165	-1.60838	0.000292117	3.19627	3.64194	2.56151
	pseudo9	7647419	7648252	79	Pav_sc0000584.1_g740.1.mk	probable leucine-rich repeat receptor-like serine/threonine-protein kinase At3g14840	-2.54005	-4.40551	-3.27527	-1.0619	1.07143	-0.538868	1.50691	-3.57443	-2.54245	1.16263	0.164286	0.392427	8.66745e-11	3.34181	3.26418	3.85703
	pseudo1	2305836	2306158	78	Pav_sc0000012.1_g090.1.br	Unknown	0.839119	-2.8578	-1.16713	0.541285	1.51763	2.56191	1.34857	0.165512	-2.20639	1.84837	3.75316	2.78872	0.000908592	2.10757	0.711621	3.33842
	pseudo10	5277840	5278049	78	Pav_sc0000638.1_g530.1.mk	omega-3 fatty acid desaturase, chloroplastic-like	-6.10294	-2.82189	-4.6956	-2.5976	-0.985377	3.14401	2.89679	-0.274568	4.30819	-0.445634	-6.08695	-0.863202	-4.05061e-11	5.61114	7.1734	2.73875
	pseudo10	8393415	8393645	78	Pav_sc0000663.1_g350.1.mk	zinc finger protein 346-like	-0.987858	-1.78324	-2.99122	-0.231345	0.860513	2.43459	1.30446	0.174094	-0.874224	2.12587	-0.385835	2.8361	6.64159e-10	3.1327	2.1704	3.73664
	pseudo11	6493947	6494399	78	Pav_sc0000740.1_g340.1.mk	putative receptor-like protein kinase At3g47110	1.01715	-0.271207	2.82444	-3.05536	-2.9657	-1.41225	-0.959858	0.0928675	-1.42974	-0.308752	-1.16227	-0.124768	0.000143929	-3.99298	-2.34785	-2.19409
	pseudo12	3374752	3374942	78	Pav_sc0000817.1_g040.1.br	Unknown	-0.682631	-1.03228	-0.268715	2.59572	1.42727	1.31114	0.60887	2.2918	3.06149	-0.142218	2.74219	3.08933	0.000460107	2.52988	2.92704	3.05215
	pseudo13	1416658	1417031	78	Pav_sc0000890.1_g1090.1.mk	Unknown	-1.26868	-3.51067	-3.74596	0.645475	0.561558	-0.858369	0.771343	-0.629631	1.31797	-1.34076	-1.64923	0.126182	0.00034174	2.63725	3.06948	1.6446
	pseudo14	9565443	9566025	78	Pav_sc0001124.1_g280.1.mk	homeobox-leucine zipper protein ROC8-like	-2.61898	-2.52115	-1.44024	-1.70311	-1.25686	-0.443939	0.937046	-4.91922	-0.173588	-0.120123	0.0804721	2.92704	0.00102908	1.04996	2.00628	3.76377
	pseudo14	7194439	7194676	78	Pav_sc0001105.1_g170.1.mk	hypothetical protein PRUPE_ppa023115mg	-1.97839	-2.35128	-3.02057	2.47614	2.94448	-1.66739	-0.616832	-2.72131	2.7211	1.09462	-0.979953	-1.30532	0.000162308	4.56653	3.69049	2.41094
	pseudo14	2535880	2536280	78	Pav_sc0001051.1_g390.1.mk	probable receptor-like protein kinase At5g39020	-2.61927	-2.3919	-5.36104	-0.527616	-0.169203	-1.46833	1.25072	-1.54985	0.392545	-1.51329	-1.4732	0.672622	0.000363925	2.36437	3.41718	2.60945
	pseudo15	6361987	6362252	78	Pav_sc0001236.1_g100.1.mk	Unknown	-1.76007	-2.88411	-2.5185	-1.97222	1.1304	-0.333907	-0.355137	-0.00205318	0.905851	-0.0223388	2.54893	-2.44726	0.000486368	2.41934	2.59397	3.53596
	pseudo16	726497	726674	78	Pav_sc0001302.1_g040.1.br	Unknown	-1.31988	-4.00643	-3.26834	-3.7227	-3.27984	2.03686	-1.59907	2.26225	-3.13359	2.29897	-3.28167	3.44116	8.96533e-05	2.91802	3.20962	4.80929
	pseudo16	3487250	3487532	78	Pav_sc0001328.1_g020.1.br	Unknown	1.58233	-5.51284	-4.93601	-5.1559	-5.21837	-2.44184	-4.9378	-5.48555	1.71805	2.55433	2.46172	1.50402	2.60062e-05	-3.67355	0.133562	2.22137
	pseudo16	5554614	5555007	78	Pav_sc0001358.1_g020.1.br	Unknown	-2.51508	-1.66849	-2.61104	-0.803368	0.760168	-0.478876	0.628182	0.615918	-0.39474	0.0109685	2.03795	0.464411	0.000622691	2.19176	2.55505	3.31351
	pseudo18	2623931	2624449	78	Pav_sc0001739.1_g060.1.br	hypothetical protein PRUPE_ppa013095mg	-2.71579	-3.42282	-3.98967	0.347015	0.968968	-1.60313	-1.24004	-0.505201	0.933197	0.721967	-1.74056	-1.23028	0.000589964	3.52835	3.29991	2.94494
	pseudo19	2037055	2037382	78	Pav_sc0001987.1_g060.1.br	germin-like protein subfamily 1 member 11	-1.24572	-2.46138	-5.37386	0.170784	-1.42628	-0.815719	1.4175	-3.23086	-0.0378837	0.0749043	-0.471348	2.18503	6.43633e-06	1.71933	2.58017	3.33294
	pseudo2	8764676	8764927	78	Pav_sc0000094.1_g030.1.mk	CASP-like protein At2g28370	-3.95675	-5.5573	-3.21451	1.6173	-0.831522	-1.25461	-1.49235	-2.34357	2.28081	-0.885559	0.714762	-0.278627	-3.64237e-12	4.38816	4.80672	3.95883
	pseudo2	1490823	1491066	78	Pav_sc0000055.1_g360.1.mk	uncharacterized protein LOC103341876	-0.105954	-1.77878	-2.15727	0.790222	1.16429	1.28109	0.823658	-0.773574	-2.06857	2.08708	2.12914	1.88217	0.000271931	2.14738	0.843892	3.09086
	pseudo21	9133340	9133694	78	Pav_sc0003135.1_g800.1.br	putative ribonuclease H protein At1g65750	-2.307	-5.04563	-1.13916	-0.177097	-2.40011	0.3355	0.678512	0.970858	-0.126943	-2.0784	0.259222	2.50769	7.9155e-05	1.7668	2.70521	3.37493
	pseudo22	7357033	7357266	78	Pav_sc0003905.1_g070.1.br	hypothetical protein PHAVU_003G199000g	-1.98705	-3.69215	-3.39268	-4.02841	-4.46602	-3.56949	1.50945	0.0863403	-3.36345	1.17201	1.15083	1.23246	9.67119e-05	-1.15514	3.23714	4.00551
	pseudo3	2834936	2835229	78	Pav_sc0000105.1_g290.1.br Pav_sc0000105.1_g300.1.br	Unknown uncharacterized protein LOC103342106	-2.47735	-1.52538	-4.04422	1.05912	-1.35964	1.26038	-2.1094	-0.660085	0.123171	0.517961	0.0469711	-1.30105	0.00132137	3.05076	1.73337	2.28863
	pseudo4	3991690	3992000	78	Pav_sc0000174.1_g1820.1.br	major allergen Pru ar 1-like	-5.30757	-2.24661	-2.77836	-0.402559	-3.12504	1.26451	-1.90613	-4.17678	-2.4703	-0.803531	0.103176	0.0778136	1.0325e-05	3.10027	0.396738	2.82368
	pseudo4	7291388	7291743	78	Pav_sc0000200.1_g430.1.br	Unknown	-4.9021	-4.36742	-3.31035	-3.80175	-1.47014	0.0275332	-0.80296	2.15656	-3.50847	1.2376	0.967395	0.858662	0	2.99043	4.80849	5.06759
	pseudo8	2299824	2300097	78	Pav_sc0000480.1_g1170.1.br	polyubiquitin 11-like	-0.708804	-3.34115	-1.88911	-1.67589	-0.808182	1.5495	-0.619571	0.367129	-1.26205	-0.45495	1.83366	2.82194	0.00160942	1.9587	1.26576	3.53498
	pseudo8	8328637	8329007	78	Pav_sc0000525.1_g020.1.br	zinc finger BED domain-containing protein RICESLEEPER 2-like	-2.79546	-2.56712	-3.54804	-3.03828	2.40193	-0.34531	-0.502821	-0.862735	3.55087	0.0860075	0.753922	2.96856	5.24596e-06	3.95903	5.02587	4.7308
	pseudo9	7752644	7753070	78	Pav_sc0000586.1_g040.1.br	putative F-box protein At5g60060	-2.99516	-5.40137	-1.95516	-2.04558	-4.38362	-1.16705	0.154253	-2.17775	-3.09522	1.38531	-1.06067	0.211131	0.000594739	0.853721	1.83392	3.38421
	pseudo10	258230	258598	77	Pav_sc0000600.1_g410.1.br	Unknown	-0.470449	-1.94084	-3.11997	2.23816	1.93857	1.77945	1.10755	0.899791	0.353467	1.52734	1.97743	0.579753	0.00039624	3.44919	2.27164	2.92185
	pseudo10	3099252	3099563	77	Pav_sc0000624.1_g1300.1.mk	probable inactive purple acid phosphatase 28	-3.65137	-1.50113	-3.08004	-1.88833	0.203698	-1.63646	1.46718	-0.0459866	1.14109	-0.788458	-0.734546	0.224653	1.43478e-05	1.66149	3.42977	2.09129
	pseudo10	9900329	9900805	77	Pav_sc0000675.1_g1100.1.br	uncharacterized protein LOC103328853	-2.34039	-4.81056	-3.29984	-0.824699	-1.14376	-1.12156	0.846568	0.241083	-2.178	-2.21173	-0.813707	0.51154	0.000120589	2.14179	3.2579	2.72363
	pseudo11	8533026	8533278	77	Pav_sc0000755.1_g410.1.mk	anaphase-promoting complex subunit 7	-0.701706	-1.45016	-1.45071	0.170074	0.293398	1.47102	2.5069	1.04162	2.0721	2.23833	-0.678135	0.981235	0.00112242	1.92755	3.14924	2.44198
	pseudo12	9627863	9628037	77	Pav_sc0000873.1_g180.1.br	uncharacterized protein LOC103328856	-1.73051	-0.246723	-1.39719	1.26764	2.85182	2.35073	2.10286	-2.73262	2.39258	2.31234	3.15719	2.29982	0.000158784	3.27276	2.66985	3.62587
	pseudo12	9103566	9103827	77	Pav_sc0000866.1_g340.1.mk	zeaxanthin epoxidase, chloroplastic-like isoform X2	-2.77474	-1.38307	-2.53025	-0.401188	1.14508	2.28597	1.61306	0.281815	-0.404038	0.496582	0.505634	-3.11492	0.000365112	3.48107	2.83985	2.06793
	pseudo13	1544206	1544623	77	Pav_sc0000890.1_g1370.1.br	putative ribonuclease H protein At1g65750	-3.93116	-4.35615	-3.77945	-3.89815	0.603885	-1.47447	-2.07805	0.385788	2.55173	0.577535	0.14161	-1.7931	0.00026964	3.37836	5.30615	3.94536
	pseudo13	3582399	3582638	77	Pav_sc0000909.1_g400.1.br	zinc finger MYM-type protein 1-like	0.794492	-5.66978	-1.47655	2.26762	0.746273	2.09639	1.7984	1.66237	3.17236	2.76748	2.57335	4.39646	9.69044e-07	2.34922	2.88931	4.00026
	pseudo14	9277888	9278113	77	Pav_sc0001120.1_g110.1.mk	histone deacetylase 8	0.861815	0.439989	2.40914	0.748503	1.49622	0.0951204	2.21673	0.678386	0.578365	-1.78191	-1.36291	-1.68587	2.18729e-06	-0.607522	-0.132314	-3.0989
	pseudo15	9544418	9545128	77	Pav_sc0001275.1_g210.1.mk Pav_sc0001275.1_g220.1.mk	hypothetical protein PRUPE_ppa002461mg probable acyl-activating enzyme 6	-2.87245	-4.75216	-3.48289	-4.20986	-1.39797	-2.06824	0.262956	1.19847	-2.04388	-1.66928	-2.21923	0.483725	0.000197746	1.35273	3.82833	2.87304
	pseudo17	816862	817421	77	Pav_sc0001467.1_g010.1.mk	bifunctional monodehydroascorbate reductase and carbonic anhydrase nectarin-3-like	-0.112567	-3.03792	-3.11944	1.24247	-0.327149	1.31881	2.17559	2.69492	2.12981	1.54273	0.551788	-2.31644	0.000339181	2.28391	3.72568	1.97906
	pseudo18	10598014	10598520	77	Pav_sc0001911.1_g550.1.mk	DEAD-box ATP-dependent RNA helicase 5	-2.6205	-1.9727	-0.978505	1.90156	1.3749	1.30147	-0.0454717	-0.837725	-0.151516	0.39272	-1.68879	0.608001	8.61313e-05	3.24924	1.39289	1.76671
	pseudo20	5443110	5443497	77	Pav_sc0002450.1_g060.1.br	Unknown	-1.29644	-1.27288	-2.94257	-0.425894	-0.116543	2.65551	1.08767	0.999653	0.848329	-1.09604	1.28059	2.33162	0.00215607	3.06655	2.6393	3.05991
	pseudo20	9044768	9045260	77	Pav_sc0002598.1_g060.1.br	putative ribonuclease H protein At1g65750	-1.2263	-4.54544	-4.95782	-1.94067	1.02486	1.52989	1.71712	-0.0533339	-1.90305	-1.32589	-1.98197	1.60359	0.00134641	3.36681	3.16902	2.87708
	pseudo20	7382578	7382806	77	Pav_sc0002508.1_g060.1.mk	THO complex subunit 1	0.487069	-2.9681	-3.00297	-0.617348	1.73289	2.72147	2.55108	-4.02115	3.39758	0.441999	3.73565	2.95706	7.56225e-05	2.676	3.31488	3.76225
	pseudo21	382492	382847	77	Pav_sc0002697.1_g080.1.br	probable mannitol dehydrogenase	-2.80716	-2.66673	-2.72816	-0.70584	1.33439	-0.107431	-1.67136	-2.15483	0.0166247	-0.511526	-5.02011	-3.00646	0.000374668	3.17046	1.78028	0.924838
	pseudo25	5770788	5771052	77	Pav_co4010099.1_g010.1.mk	pentatricopeptide repeat-containing protein At3g48810	-3.26138	-2.2971	-0.734299	-3.68393	-4.20615	0.0740725	3.26566	-3.38462	3.92628	-1.55117	-3.55739	2.40657	8.57182e-05	0.382344	4.77687	2.65596
	pseudo3	1151523	1152390	77	Pav_sc0000102.1_g310.1.mk	uncharacterized protein LOC103331976	2.10215	-1.16128	-1.88459	-3.01194	-3.46683	-2.37764	0.309682	0.94648	-0.310481	0.43575	0.979547	0.30935	0.000159839	-3.6227	-0.335003	-0.135046
	pseudo4	1148101	1148707	77	Pav_sc0000153.1_g140.1.br	retinitis pigmentosa 1-like 1 protein	-0.582721	0.424959	0.221468	-2.92611	-3.53177	-1.32673	-2.00823	-1.75185	-2.53844	-4.11836	-3.83219	-2.38501	0.000214281	-2.36464	-2.14598	-3.31461
	pseudo4	9660846	9661047	77	Pav_sc0000209.1_g270.1.br	uncharacterized abhydrolase domain-containing protein DDB_G0269086-like	-1.24163	-1.91477	-1.41922	-1.80393	0.295839	3.07447	1.44271	2.02885	3.4355	2.22469	-0.986138	-1.15067	5.6289e-10	3.22611	4.05217	2.40615
	pseudo6	6283352	6283660	77	Pav_sc0000351.1_g380.1.mk	uncharacterized protein At3g61260	-2.43964	-1.56726	-1.2756	0.497175	0.992186	2.17465	1.59962	0.1879	0.977168	0.621986	-0.212792	1.98493	0.00104108	3.08189	2.71507	2.76632
	pseudo1	3886316	3886602	76	Pav_sc0000022.1_g040.1.mk	ankyrin repeat-containing protein At3g12360-like	-1.63069	-3.22403	-1.46444	0.514263	0.0107738	-1.12173	-1.0197	0.860609	-1.37075	0.755121	-0.138471	2.28418	0.000766976	1.86954	1.76649	3.23637
	pseudo10	1151109	1151567	76	Pav_sc0000616.1_g230.1.mk	uncharacterized protein LOC103326478	-1.40396	-1.76545	-0.990685	2.48963	1.14918	-0.571293	1.5113	1.66422	1.56434	0.873501	2.70523	2.99581	0.000183153	2.85571	2.93333	3.79651
	pseudo10	6378660	6379075	76	Pav_sc0000652.1_g150.1.mk	uncharacterized protein LOC103343711	-2.48868	-2.99539	-2.03049	-0.554105	-2.01075	-1.25751	2.38627	-2.79763	-2.78212	-3.29153	-1.98189	-3.27779	2.28541e-06	1.29713	3.33081	-0.258481
	pseudo13	2680013	2680331	76	Pav_sc0000907.1_g030.1.br	importin subunit alpha-1	-1.25759	-5.56495	-2.24607	-0.476255	1.02411	2.18049	1.44151	-3.33902	-0.030614	-3.98194	-0.843104	-0.797773	2.38615e-10	3.48618	2.54479	0.8793
	pseudo14	954919	955221	76	Pav_sc0001031.1_g300.1.br	heterogeneous nuclear ribonucleoprotein A3 homolog 2-like	-2.10255	-2.69681	-1.06826	-1.77237	-1.15563	1.314	1.15323	2.18223	-1.11051	0.574531	-2.23705	0.492654	0.000266881	1.90153	3.0641	1.84709
	pseudo16	6364031	6364488	76	Pav_sc0001381.1_g020.1.mk	uncharacterized protein LOC103335917 isoform X1	-1.89229	-3.82825	-2.69043	-1.52368	-1.85738	-0.215237	-1.66914	-0.311392	0.566874	0.329838	1.36163	2.35228	0.000468694	1.58602	2.39479	4.17451
	pseudo18	7510025	7510244	76	Pav_sc0001837.1_g030.1.br	Unknown	0.559126	-3.3076	-0.51574	-1.89159	0.404353	2.47082	0.170531	1.46452	1.81005	2.74647	0.900129	3.46769	9.40958e-05	1.65012	1.7008	3.11062
	pseudo2	707084	707228	76	Pav_sc0000052.1_g450.1.br	extensin-3-like	-1.02904	-6.64386	0.985462	-6.64386	-6.64386	-6.64386	-0.732863	-2.06415	3.65005	3.94472	2.09374	4.25299	-3.45837e-12	-6.36922	2.43325	3.96519
	pseudo20	5387811	5388338	76	Pav_sc0002449.1_g070.1.mk	hypothetical protein L484_018376	-1.30532	-1.20402	-3.35412	0.49219	2.98591	0.781346	1.85116	-0.114204	-1.07328	0.0389462	-0.742671	-1.75721	0.000111952	3.56032	2.41862	1.03638
	pseudo20	5330353	5330706	76	Pav_sc0002446.1_g150.1.mk	Unknown	-2.15371	-3.6933	-4.53294	1.27608	-2.93603	0.453501	-2.64866	-1.26423	-4.45669	-0.500567	-4.35138	-1.35152	0.000168767	3.50588	0.847784	1.73309
	pseudo22	5539055	5539710	76	Pav_sc0003756.1_g050.1.mk	TMV resistance protein N-like, partial	-0.773924	-1.43113	-2.34431	1.79964	2.60321	1.60432	1.5735	-2.92588	-0.501692	-0.979897	-0.312085	-1.72157	0.000763826	3.45027	1.72648	0.487294
	pseudo23	4880555	4880806	76	Pav_sc0005121.1_g010.1.mk	kinesin-like protein KCA2	-2.40099	-3.63851	-3.45281	-2.5514	0.837854	1.20864	0.732452	1.97794	-1.78794	2.52125	0.380066	2.35781	4.28982e-11	3.56405	4.02844	5.07513
	pseudo24	8422793	8423016	76	Pav_sc0008609.1_g020.1.br	UPF0481 protein At3g47200-like	-1.57316	-0.434326	1.89869	-3.03285	-2.65672	-3.36182	1.93521	1.77803	0.132664	1.53842	-3.16374	-0.0284069	2.96656e-05	-3.66789	0.797324	-0.265633
	pseudo5	9663708	9663944	76	Pav_sc0000287.1_g250.1.mk	hypothetical protein PRUPE_ppa012893mg	-3.79545	-3.10006	-1.88117	-1.04388	-2.0283	0.394958	2.34637	-2.20032	-0.960399	-3.18864	-0.793087	-0.99878	0.000407465	2.15211	3.66022	1.36753
	pseudo6	5593820	5593991	76	Pav_sc0000349.1_g130.1.mk	uncharacterized protein ycf36	-1.73714	-5.4904	-2.72045	-1.53741	-0.149104	0.474031	1.60349	1.38383	2.65361	0.871735	-0.311688	-2.00054	6.93337e-07	2.47521	4.65506	2.60604
	pseudo8	9373878	9374120	76	Pav_sc0000540.1_g030.1.mk	cation/H(+) antiporter 1-like	-0.739564	-4.88077	-3.69367	-3.43072	0.401044	-1.29871	1.74053	-1.40933	1.30365	-1.11501	1.82026	0.147293	1.5572e-06	1.3575	3.12295	2.84448
	pseudo8	2873812	2874018	76	Pav_sc0000484.1_g100.1.br	Unknown	-3.51989	-1.55086	-1.59703	1.83116	-1.05359	2.62837	3.22139	0.553076	-3.65866	-0.853777	2.35563	1.74843	3.29149e-05	3.75153	3.84046	3.5727
	pseudo9	517164	517469	76	Pav_sc0000549.1_g940.1.mk	hypothetical protein PRUPE_ppa003101mg	-1.84038	-3.31057	-2.49999	1.49811	0.625675	1.07498	1.71191	0.144811	-2.33415	-0.493326	0.0172849	1.55059	5.49545e-05	3.53946	3.04002	3.06251
	pseudo1	37103	37765	75	Pav_sc0000001.1_g050.1.br	hypothetical protein PRUPE_ppa025184mg, partial	-2.00148	-2.52621	-5.65326	-0.770654	-1.59007	2.01089	0.24929	-0.97593	0.773212	-2.87971	-1.23612	-1.60908	1.37203e-05	3.48097	2.94207	1.00288
	pseudo1	4387169	4387376	75	Pav_sc0000024.1_g060.1.mk	Unknown	-2.90409	-3.1183	-2.95858	-2.60074	0.809075	-3.49293	1.42136	-4.53438	1.42967	1.60092	2.13954	-2.95834	1.8414e-05	2.41002	3.84293	4.32582
	pseudo10	2037879	2038120	75	Pav_sc0000622.1_g180.1.mk	uncharacterized protein LOC103326649	-1.70416	-2.70063	-1.19401	2.0275	0.0879952	1.58444	-2.26513	-2.28858	-2.21111	-0.0689952	1.14416	1.67639	4.88592e-07	3.18033	-0.514099	2.82448
	pseudo10	1125479	1125675	75	Pav_sc0000616.1_g200.1.mk	vacuolar protein sorting-associated protein 22 homolog 1	0.537022	-6.41275	-3.10954	1.70422	-3.03444	1.61734	3.30846	0.921543	0.888161	2.48952	-2.64598	0.096457	-4.68675e-11	2.03038	3.11242	2.11639
	pseudo11	1188988	1189186	75	Pav_sc0000699.1_g040.1.mk	Os12g0228500	2.17605	-3.055	-3.33927	-3.93903	-1.34154	-3.58637	2.58038	1.8465	2.11195	1.89977	1.27245	2.23211	5.34438e-05	-3.12521	1.55265	1.19466
	pseudo14	1336442	1336697	75	Pav_sc0001038.1_g030.1.mk	hypothetical protein PRUPE_ppa015443mg	-5.88474	-5.73387	-5.67119	-5.46474	2.52437	1.76383	0.316841	-1.25257	-0.364318	-1.2509	2.10953	2.82507	1.01352e-06	7.37276	5.46369	7.73897
	pseudo16	839880	840089	75	Pav_sc0001302.1_g320.1.mk	Unknown	0.545988	-0.134931	0.296257	-1.06329	1.54001	3.05688	2.79186	3.32206	3.68878	2.60332	1.12673	2.50118	0.00367766	1.70198	3.05081	1.95182
	pseudo16	7411378	7411689	75	Pav_sc0001405.1_g640.1.mk	Unknown	-0.573203	-4.88393	-3.0684	0.214332	-0.699244	0.0585017	1.02677	0.999846	-0.802271	0.997034	0.617985	2.672	0.000119425	1.77157	2.48216	3.58515
	pseudo16	2489510	2490273	75	Pav_sc0001313.1_g130.1.mk Pav_sc0001313.1_g140.1.mk	Unknown ankyrin repeat domain-containing protein EMB506, chloroplastic	-1.28554	-4.84393	-3.66427	0.0268843	0.922688	1.27377	0.18256	-0.93535	-2.72995	-0.894149	-0.910947	1.2496	0.000625194	3.34738	1.78743	2.71822
	pseudo18	2317318	2317968	75	Pav_sc0001725.1_g500.1.br	hypothetical protein PRUPE_ppb019047mg, partial	-1.80155	-5.04408	-5.94154	-0.90072	0.288546	-0.192759	1.45594	-1.07683	-2.57236	1.63544	-0.12326	0.398319	1.89608e-05	2.9806	3.34386	4.00209
	pseudo2	603463	603673	75	Pav_sc0000052.1_g140.1.br	uncharacterized protein LOC103327932	1.559	2.46177	2.86607	-2.62304	-0.0273033	-1.49242	2.11615	1.05411	1.77871	0.193374	2.44282	1.7937	0.000429536	-3.39294	-0.677835	-0.648168
	pseudo20	2972392	2972815	75	Pav_sc0002360.1_g330.1.mk	LOW QUALITY PROTEIN: lipoyl synthase 2, mitochondrial-like	-3.34218	-5.71945	-4.61273	-1.857	-2.02881	-0.39485	2.14793	0.521833	-3.2477	-1.4581	-1.87878	0.317295	0.000395374	3.01586	5.23628	3.57
	pseudo22	6321166	6321429	75	Pav_sc0003823.1_g230.1.br	Unknown	-1.77663	-0.845703	-1.26129	1.33209	1.84095	2.77836	1.36503	0.485358	-2.22847	2.27229	2.29458	1.73533	0.000905183	3.35641	1.72697	3.36813
	pseudo24	10929414	10930069	75	Pav_sc0009704.1_g010.1.br	Unknown	-0.0389956	1.69058	-0.904356	-0.12197	-6.06062	-3.26766	-2.68525	-2.10917	-0.672454	-4.99478	-2.92303	-3.38685	4.75565e-05	-2.19005	-2.22246	-4.19352
	pseudo3	6047697	6047995	75	Pav_sc0000123.1_g430.1.br	fibrous sheath CABYR-binding protein-like	-0.339899	-1.65574	-2.32555	-0.266733	2.06519	2.57827	2.44526	1.54451	1.18112	3.02314	1.03513	0.478757	0.000337688	3.07167	3.02396	3.14636
	pseudo3	5304538	5304763	75	Pav_sc0000119.1_g290.1.mk	Unknown	-1.05811	-0.00584033	-0.658779	1.54479	0.395658	2.57651	3.58806	1.96247	1.43093	1.93913	1.32648	2.37015	0.000784782	2.27324	3.14173	2.44815
	pseudo5	6505151	6505407	75	Pav_sc0000257.1_g470.1.mk	Unknown	-2.20653	-3.76398	-3.38414	-0.786014	-3.53658	0.0616723	1.9617	-1.00684	-3.60863	-1.97127	-3.08888	0.924278	0.000213567	2.14699	3.53499	2.55604
	pseudo7	7364541	7364749	75	Pav_sc0000428.1_g230.1.br	zinc finger MYM-type protein 1-like	-2.48515	-3.70418	-2.20613	-4.03408	-1.75854	2.87205	-1.32194	-3.69452	0.545615	2.59225	-3.31741	3.01799	0.000112282	4.02367	2.03674	4.91398
	pseudo1	10505492	10505780	74	Pav_sc0000046.1_g040.1.br	uncharacterized protein LOC103336073	-1.27479	-2.40036	-1.83804	2.78725	0.066175	1.83938	1.75537	-0.329779	2.00948	2.57198	1.12549	0.967192	4.09166e-05	3.70764	3.21578	3.51434
	pseudo11	9799618	9799807	74	Pav_sc0000763.1_g020.1.mk	7-ethoxycoumarin O-deethylase-like	-4.40471	-1.89507	-2.58533	-1.91578	2.12269	-0.453902	-1.38957	-2.52399	-1.61856	-3.90225	0.305657	-0.970288	0.000558764	3.47039	0.868359	1.90941
	pseudo12	7337850	7338250	74	Pav_sc0000852.1_g450.1.mk	low-temperature-induced cysteine proteinase	3.5063	0.490147	1.33221	0.262915	-2.13788	-2.43993	1.30753	-0.64149	0.0315506	1.48266	-1.72239	0.106446	0.000573318	-3.24579	-1.88506	-1.87259
	pseudo12	10914402	10914769	74	Pav_sc0000882.1_g210.1.br	Unknown	-2.86038	-5.08086	-2.99306	-0.198273	1.22612	0.808276	-0.202582	-1.2745	-1.56238	-3.09194	-3.05933	-1.02979	9.42432e-05	4.08271	2.4686	1.31184
	pseudo12	8633412	8633635	74	Pav_sc0000863.1_g590.1.mk	TMV resistance protein N-like	-0.202631	-3.12841	-0.780642	-0.0881956	2.27313	3.08598	1.18223	0.7006	0.126324	1.00799	1.49072	2.44256	9.07237e-06	3.18792	1.67132	2.71204
	pseudo13	4455264	4455421	74	Pav_sc0000911.1_g480.1.br	Unknown	-2.24744	-2.07296	-2.04733	0.609142	1.46838	0.765228	-1.8351	-2.36165	2.83823	1.26073	-1.96255	3.00609	0.000510942	3.11798	3.46589	3.95264
	pseudo13	6176453	6176675	74	Pav_sc0000977.1_g060.1.mk	protein TRANSPARENT TESTA 1	-2.64687	-3.48183	-3.2613	1.63789	-0.0775704	0.364634	0.938991	-1.67414	-2.60499	0.902866	-4.84911	-1.0596	2.85567e-07	3.91917	2.76033	2.75388
	pseudo14	6263831	6264028	74	Pav_sc0001099.1_g020.1.br	probable glycerol-3-phosphate acyltransferase 3	-1.62245	-2.33723	-3.70131	-3.89279	1.78967	2.41511	-2.17893	0.227103	0.768729	2.03145	1.17458	3.14662	9.3982e-05	3.88508	2.36803	4.66416
	pseudo14	5257975	5258111	74	Pav_sc0001082.1_g120.1.mk	sugar transport protein 13-like	-3.27218	-0.472718	-4.55622	-4.34192	3.46909	1.58529	-3.91074	0.656253	2.21318	2.63718	-5.26203	0.30705	5.4024e-07	4.0266	2.85716	3.11042
	pseudo18	8604146	8604737	74	Pav_sc0001869.1_g260.1.mk	probable calcium-binding protein CML36	-2.38466	-0.719606	-4.08598	-0.841216	0.314413	2.0116	2.31353	0.458909	-0.238341	0.893461	2.03094	1.66323	0.000143763	2.76604	3.0682	3.40926
	pseudo2	5270975	5271204	74	Pav_sc0000072.1_g190.1.mk	brefeldin A-inhibited guanine nucleotide-exchange protein 2-like	-1.88835	-4.19298	-0.883206	-3.3694	-3.52385	0.282896	1.15486	1.06853	2.08533	1.26439	0.502427	-1.48067	7.57107e-05	0.691751	3.30487	2.2685
	pseudo21	904638	905173	74	Pav_sc0002722.1_g200.1.br	Unknown	-2.18951	-3.36658	-3.11399	-3.61227	-1.9361	-0.554223	0.96702	-1.14466	-1.64678	0.923496	-0.431542	0.403063	0.000408783	1.24634	2.65898	3.19764
	pseudo22	78728	79114	74	Pav_sc0003261.1_g240.1.mk	B3 domain-containing protein LOC_Os12g40080-like isoform X2	-0.416479	-3.78593	-0.972917	-3.51293	-1.70991	0.1902	2.11894	-0.401408	2.9907	-1.05643	-0.60766	2.05969	9.78301e-05	0.204735	3.29316	1.99488
	pseudo23	10966805	10967382	74	Pav_sc0006209.1_g020.1.br	Unknown	0.754859	1.67893	0.314864	-4.02277	-0.102128	-2.5059	-1.70429	-2.5271	-2.06222	1.64419	-1.92479	-3.24349	7.69242e-07	-2.39109	-3.09097	-0.811491
	pseudo24	8309054	8309373	74	Pav_sc0008558.1_g010.1.br	LOW QUALITY PROTEIN: ATP-dependent DNA helicase 2 subunit KU80	-0.966432	-2.9182	-4.30467	0.59309	1.95668	0.364797	1.06105	-0.413023	-0.470138	-1.28646	-1.38139	-0.103379	0.000550536	3.265	2.35724	1.31192
	pseudo24	7134805	7135172	74	Pav_sc0008117.1_g010.1.br	Unknown	3.17843	-2.3407	2.87705	-2.11824	-0.419435	-2.29633	0.479716	-0.859816	-0.580661	-0.56024	-1.15914	-3.53662	0.000538348	-3.81209	-2.66652	-3.7753
	pseudo3	526760	526942	74	Pav_sc0000100.1_g120.1.br	pentatricopeptide repeat-containing protein At1g62914, mitochondrial-like	0.354128	-1.98322	-3.19473	-1.07446	2.22653	2.01426	2.73362	2.38976	2.14857	1.22628	1.95784	-1.56863	3.54867e-05	2.48679	3.31508	2.00003
	pseudo3	2445623	2446191	74	Pav_sc0000103.1_g1950.1.mk	protein-lysine methyltransferase METTL21B-like isoform X2	-2.87718	-5.92767	-2.72941	-2.29335	-1.54114	0.189857	-1.70929	-3.8325	-0.266543	-3.11897	-2.20827	2.16279	0.000489087	2.47661	1.99287	3.9869
	pseudo4	6667831	6668227	74	Pav_sc0000195.1_g600.1.mk	acetyltransferase At1g77540	-1.44553	-1.62973	-1.42119	1.23452	-0.915223	0.815365	-0.363735	2.34367	2.40588	0.0614278	-0.607762	2.45096	0.000391426	2.12596	3.39021	2.75236
	pseudo4	1532164	1532376	74	Pav_sc0000157.1_g670.1.mk	alpha-1,6-mannosyl-glycoprotein 2-beta-N-acetylglucosaminyltransferase isoform X1	-1.49443	-3.68973	-1.9338	-4.05889	-2.54829	-3.93414	0.59934	-3.14304	1.98354	1.88448	-3.95559	2.17913	0.000221211	-1.22782	3.00767	3.57725
	pseudo4	1544277	1544662	74	Pav_sc0000157.1_g690.1.br	probable metal-nicotianamine transporter YSL6 isoform X2	-2.27707	-5.56282	-2.32228	-1.8813	0.222162	0.286748	-2.03962	1.84618	-0.876655	0.987509	0.534683	-0.649811	0.000274641	2.6365	3.35829	3.25085
	pseudo5	3113242	3113690	74	Pav_sc0000231.1_g690.1.br Pav_sc0000231.1_g710.1.br	hypothetical protein PRUPE_ppa025184mg, partial Unknown	-1.00997	-5.23532	-3.61738	-1.09237	2.41201	2.03178	0.985629	-0.683068	-3.3962	0.353203	-0.464809	-1.28761	0.000380845	4.03053	2.15787	1.99597
	pseudo5	5785493	5785671	74	Pav_sc0000254.1_g900.1.br	Unknown	-5.72351	-5.65992	-3.1402	-3.53479	1.98318	1.29017	-4.08999	2.11537	1.93887	-3.45208	-4.44962	3.36808	4.06755e-09	5.41385	5.7568	6.10376
	pseudo6	1034603	1035083	74	Pav_sc0000308.1_g220.1.mk	(R)-mandelonitrile lyase 2	-2.7551	-5.00429	-5.62636	-4.5261	-2.99918	0.080131	-2.33839	-2.28686	-2.52951	0.923254	-0.266763	1.40717	2.26616e-08	2.61881	1.5291	4.75287
	pseudo7	2782051	2782265	74	Pav_sc0000389.1_g1120.1.br	Unknown	-2.09214	-2.83293	-1.73739	1.2604	0.875832	1.47637	3.09553	-0.484919	-2.20558	-0.306218	1.05673	0.725676	0.00011104	3.37756	3.81222	2.75102
	pseudo7	10856886	10857576	74	Pav_sc0000465.1_g1530.1.br	probable copper-transporting ATPase HMA5	-1.90844	-3.48183	-3.56778	0.331854	1.08797	-2.23962	0.267061	0.758265	0.48009	-3.30113	-0.019965	0.285553	0.00065881	3.03014	3.28456	2.38946
	pseudo9	6361382	6361624	74	Pav_sc0000582.1_g600.1.mk	pentatricopeptide repeat-containing protein At1g71420	-0.0313427	-3.49351	-1.66248	-1.33811	0.91814	2.04605	-1.14385	0.803986	-1.56278	1.62956	0.617753	2.89971	0.000373728	2.21344	0.875103	3.12791
	pseudo1	5740099	5740412	73	Pav_sc0000028.1_g680.1.mk	uncharacterized protein LOC103323263	-3.13284	-4.77291	-1.98385	1.32752	-1.33185	1.17681	-1.75484	-3.09177	-3.79722	-0.658365	-0.0879249	0.869161	2.71132e-07	3.67926	0.267376	3.07572
	pseudo10	5195278	5195660	73	Pav_sc0000638.1_g340.1.mk	vacuolar cation/proton exchanger 3-like	-1.30859	-2.92479	-3.64209	-0.174745	1.82353	1.48808	-0.321322	-0.392366	-3.14087	-0.259477	0.78242	0.513696	0.00038676	3.55426	1.44483	2.69405
	pseudo11	1833946	1834430	73	Pav_sc0000700.1_g1070.1.mk	FRIGIDA-like protein 5	-1.02923	-4.74094	-2.3686	-0.19936	-0.607493	2.40825	1.49266	0.410887	-2.74944	-0.212362	0.484885	2.40117	0.00249569	3.24499	2.57368	3.38743
	pseudo11	1744270	1744617	73	Pav_sc0000700.1_g870.1.mk	gibberellic acid receptor GID1c	-3.52746	-4.36085	-2.54019	1.55245	-2.8705	-2.38175	1.14849	-3.06792	-6.09366	-1.7762	-0.620419	1.46553	0.000346749	3.40788	2.93532	3.59135
	pseudo12	1990094	1990617	73	Pav_sc0000800.1_g980.1.mk	bark storage protein A-like	-2.62013	-3.91338	-3.11997	0.431708	0.756051	-3.41303	-1.90511	-1.72525	-3.16835	-0.108456	0.171648	0.209977	0.000634125	3.18621	0.984361	3.22217
	pseudo12	3454047	3454465	73	Pav_sc0000817.1_g150.1.br	serine/threonine-protein phosphatase 7 long form homolog	-3.40213	-4.42245	-1.66312	-1.13089	0.805563	-0.680171	-0.821299	-0.134231	0.425205	2.05751	-2.24179	-0.407858	0.00107784	2.62985	2.62541	3.48814
	pseudo12	9882209	9882450	73	Pav_sc0000877.1_g170.1.br	uncharacterized protein LOC103338432	1.80679	-0.155261	0.474393	-1.79273	-1.37879	-3.129	-1.09399	0.758004	1.76434	-3.08422	-1.73814	-4.44445	2.98313e-06	-2.87724	-0.0582934	-3.64161
	pseudo13	2070783	2070945	73	Pav_sc0000893.1_g670.1.mk	Unknown	-4.83901	-2.17035	1.99595	-4.63993	-4.8507	2.89129	-4.85227	-4.7155	-4.52954	2.60185	-4.76698	-4.89936	0.000282887	0.819682	-5.19412	0.532374
	pseudo14	8491530	8491691	73	Pav_sc0001111.1_g150.1.mk	anaphase-promoting complex subunit 11 isoform X1	2.72064	-6.18148	-6.19802	-6.25065	-6.18875	-0.824204	-0.204351	3.85052	4.15645	-1.23913	2.37494	1.61383	-7.10652e-13	-3.48385	2.32326	0.389637
	pseudo14	4405124	4405521	73	Pav_sc0001080.1_g040.1.mk	eukaryotic peptide chain release factor subunit 1-3	-3.25912	-4.08927	-4.43445	-4.08995	-0.587631	0.629819	-4.26025	-5.60117	2.24607	2.46539	-3.58623	-3.20884	0.00138552	3.439	4.52337	4.76988
	pseudo15	1676300	1676506	73	Pav_sc0001181.1_g140.1.mk	lipid phosphate phosphatase 2-like isoform X2	-0.767027	-1.79176	-3.95565	-2.10996	1.30006	1.00563	0.745338	-0.415309	0.508566	2.04077	0.494813	1.81837	3.80121e-05	2.32113	2.03232	3.2659
	pseudo15	3438936	3439197	73	Pav_sc0001196.1_g780.1.mk	valine--tRNA ligase-like	-1.69888	-0.469754	-3.09931	0.970852	2.80397	0.763624	2.03275	1.42563	0.175644	-1.1336	1.72085	0.715092	3.26007e-05	3.214	2.78563	2.23366
	pseudo16	8644879	8645287	73	Pav_sc0001411.1_g560.1.mk	serine/threonine-protein kinase TIO-like	-4.25858	-3.39742	-3.02524	-1.53652	1.28633	-4.35212	-3.10219	-2.79002	-3.60087	-2.95699	-2.18156	1.86019	0.000448444	3.39128	0.347278	3.88177
	pseudo17	4158474	4158788	73	Pav_sc0001518.1_g730.1.br	hypothetical protein B456_002G216700	-2.16429	-3.27069	-5.54079	-1.36552	-5.06643	-1.48478	0.654673	-0.275062	-0.459745	0.912749	-2.08767	-1.62985	0.000143777	1.15478	3.16721	2.80954
	pseudo2	289985	290240	73	Pav_sc0000051.1_g170.1.mk	Unknown	-2.32349	-3.10967	-1.41819	-2.05526	-2.82699	2.08956	-0.00944295	-1.73749	-1.44795	1.52842	-1.34463	2.13146	0.000329238	2.74913	1.26682	3.47308
	pseudo20	9866032	9866320	73	Pav_sc0002623.1_g340.1.br	malate dehydrogenase, chloroplastic	-1.26008	-3.46856	-2.39253	-1.08615	-4.75152	0.213575	-1.44363	2.44945	-0.96122	-1.07362	2.74074	0.322227	8.5599e-11	1.25593	3.18331	3.59009
	pseudo20	10237157	10237519	73	Pav_sc0002645.1_g010.1.br	Unknown	-0.00332071	-0.460948	-1.41883	1.59378	2.36811	1.64593	1.64815	0.420133	-1.1072	2.97627	1.69357	3.45417	0.00106814	2.43042	1.23434	3.39445
	pseudo20	803733	804398	73	Pav_sc0002314.1_g030.1.br	uncharacterized protein LOC103937302	-3.59496	-3.3198	-1.79853	-2.49242	1.16356	0.105772	0.453234	1.37871	0.795912	-5.16678	-1.5518	1.44241	0.000109116	2.89295	3.60051	2.71417
	pseudo21	10554473	10554972	73	Pav_sc0003209.1_g080.1.br	hypothetical protein PRUPE_ppb012140mg	-2.46759	-3.95444	-3.56999	1.18495	1.15562	0.613488	1.8986	2.40079	-0.0460685	0.449458	2.06539	0.537816	0.000332014	4.19412	4.9204	4.40957
	pseudo22	3019162	3019444	73	Pav_sc0003562.1_g440.1.mk	probable WRKY transcription factor 17	-1.80919	-3.78097	-3.32688	2.67992	0.653353	0.210321	0.267355	-1.44038	1.10634	-0.583633	0.470476	0.120336	0.000120368	4.31923	3.02461	2.77804
	pseudo24	4037476	4037862	73	Pav_sc0007167.1_g020.1.br	kinesin-like protein KCA2	-1.81335	-3.93388	-5.28687	-4.59008	-0.446261	1.02914	0.245597	-3.36631	-4.3668	1.5104	-3.55684	-3.36042	0.00203106	2.90661	1.82536	3.01273
	pseudo3	10151670	10151873	73	Pav_sc0000142.1_g130.1.br	protein NUCLEAR FUSION DEFECTIVE 4-like	-1.46179	-1.13724	-0.44106	1.73304	2.30283	1.54797	-1.21914	2.28356	3.29682	2.17384	0.397958	-0.498155	7.7332e-06	2.84695	3.28271	2.07259
	pseudo4	10536131	10536518	73	Pav_sc0000212.1_g1630.1.mk	hypothetical protein PRUPE_ppa021726mg	-2.50772	-0.534536	-5.48564	-1.24767	0.920259	-0.753154	1.33259	0.6338	1.69157	-1.28814	0.616738	-1.26205	0.00134901	1.70998	3.03846	1.40919
	pseudo6	9375820	9376272	73	Pav_sc0000367.1_g220.1.mk	hypothetical protein L484_024873	-4.6741	-3.8734	-3.97124	-2.84544	-3.37262	-1.11328	0.503934	0.240428	0.994591	0.709595	-5.24118	-1.45297	0.00012785	2.02772	4.74568	3.56596
	pseudo6	9337594	9337847	73	Pav_sc0000367.1_g140.1.br	putative ribonuclease H protein At1g65750	-1.35151	-2.05044	-0.637549	0.981975	1.46693	0.147945	2.13744	1.63322	1.63379	1.28091	1.74537	1.46374	0.00123472	2.19608	3.05495	2.74266
	pseudo7	7046271	7046604	73	Pav_sc0000423.1_g060.1.mk	Unknown	3.12174	1.50593	2.18296	-2.4037	2.33239	-0.0549735	-0.196358	-0.965557	-1.93125	3.24122	-0.0828581	-1.16727	0.000470921	-1.37821	-3.2878	-0.568664
	pseudo7	9296404	9296632	73	Pav_sc0000454.1_g270.1.mk	putative ribonuclease H protein At1g65750	2.23084	2.5552	3.34453	-1.44804	-0.801895	0.323959	1.93834	2.5194	-0.40731	0.404101	2.50717	0.899929	0.00104878	-3.24144	-1.00622	-1.22398
	pseudo8	9584749	9585079	73	Pav_sc0000540.1_g340.1.mk	putative ribonuclease H protein At1g65750	-2.11236	-5.77175	-1.25497	-0.121763	-2.97343	2.28708	0.0232485	0.860036	0.297148	-0.488599	-0.848071	1.44502	1.35488e-05	3.14816	2.60233	2.57756
	pseudo9	6405948	6406178	73	Pav_sc0000582.1_g660.1.br	hypothetical protein PRUPE_ppa014633mg, partial	2.35494	0.993977	0.857957	-2.75651	-2.4903	-0.424728	1.98121	1.27686	0.103909	-2.20065	-3.27042	-1.2868	4.04634e-06	-3.05816	-0.260555	-3.60901
	pseudo9	8681332	8681658	73	Pav_sc0000588.1_g640.1.mk	Unknown	-3.45797	-4.97853	-2.77853	0.897035	0.561674	-0.180309	-1.83495	-3.04339	-0.545455	-3.40034	-1.00871	-2.95889	4.72596e-05	3.97471	2.01727	1.42392
	pseudo1	1325674	1326325	72	Pav_sc0000008.1_g640.1.br	hypothetical protein PRUPE_ppb015547mg	-1.4427	-1.38936	-3.01583	1.65699	-1.58669	-0.311622	2.55184	1.0494	0.446574	0.669497	1.26635	-0.904553	5.75597e-06	2.29727	3.41219	2.37512
	pseudo1	7619047	7619419	72	Pav_sc0000035.1_g020.1.br	Unknown	1.09316	1.26836	-0.568444	-0.368331	1.48084	1.41535	-1.99176	-3.10479	-2.77722	1.28724	1.27959	2.31977	0.000218224	0.256813	-3.34455	0.918587
	pseudo1	8883968	8884090	72	Pav_sc0000040.1_g650.1.mk	surfeit locus protein 2 isoform X1	-1.11903	-1.27341	-0.519274	2.32602	0.486526	2.76419	2.42168	1.22424	1.20807	2.34598	2.68525	2.20003	3.09893e-05	3.07102	2.67016	3.35754
	pseudo12	277863	278285	72	Pav_sc0000781.1_g030.1.br	hypothetical protein PRUPE_ppb019047mg, partial	2.12565	0.452304	-1.76141	-0.553922	-3.11111	2.38631	-3.37001	-0.847304	-4.9809	1.36487	0.340218	1.72048	1.28798e-05	-0.00050202	-3.13897	0.243822
	pseudo14	3679945	3680368	72	Pav_sc0001073.1_g020.1.mk	aconitate hydratase, cytoplasmic	0.793804	-1.1012	-3.56238	-2.31198	-0.175685	1.05238	-3.91283	-3.55469	-4.56431	0.462266	-0.498827	1.91794	0.00125037	0.468407	-3.55948	1.36011
	pseudo14	1444447	1444642	72	Pav_sc0001040.1_g190.1.mk	box C/D snoRNA protein 1	-0.104508	-0.845961	0.189355	2.2493	2.8335	2.21642	2.70597	0.355359	1.11012	1.04233	2.66729	3.82305	0.00021692	2.65375	1.9233	3.10276
	pseudo16	4414316	4414939	72	Pav_sc0001339.1_g140.1.mk	ecotropic viral integration site 5 protein homolog	1.14361	-1.71934	-0.531517	-3.90382	-2.39703	-3.57835	-2.7718	2.05392	-3.43709	-5.10631	-5.1404	0.199657	0.000292057	-3.23503	0.454316	-1.41025
	pseudo16	837216	837476	72	Pav_sc0001302.1_g310.1.mk	Unknown	-0.949088	-4.14805	-1.59054	-2.38311	1.78914	-2.60024	-2.14326	-2.94672	0.347725	1.97761	1.7665	2.96333	0.000309776	2.07258	0.845416	4.06205
	pseudo16	314867	315417	72	Pav_sc0001296.1_g120.1.br	Tag=/pseudo	-3.02437	-3.92638	-1.63413	-0.620423	-3.33311	1.44292	0.284052	-0.575455	-1.11104	-1.63589	-0.811299	2.4377	4.49509e-05	2.76333	2.20272	3.62655
	pseudo18	8171094	8171383	72	Pav_sc0001861.1_g190.1.mk	probable mediator of RNA polymerase II transcription subunit 26b	-2.1136	-3.46731	-1.70922	-0.172463	0.214849	-0.712658	1.64642	1.38778	-1.51487	2.18574	0.0716231	2.37583	8.46304e-06	2.08315	3.28091	4.10449
	pseudo18	3045552	3045768	72	Pav_sc0001748.1_g030.1.mk	probable serine incorporator	-2.63454	-3.37795	-2.74383	-2.48864	-2.6313	2.13613	0.702168	-2.46884	-0.854718	-0.243286	0.71403	-1.04839	0.000119483	3.5421	2.53775	2.86845
	pseudo19	7735234	7735407	72	Pav_sc0002206.1_g410.1.br	Unknown	-0.477474	0.372481	-0.309155	2.3675	3.82237	1.8918	2.26417	-0.616469	-0.748266	2.27885	0.926109	1.12637	0.000111125	3.02903	1.10161	1.66399
	pseudo19	2357801	2358008	72	Pav_sc0001991.1_g200.1.mk	uncharacterized protein At1g03900	-1.5334	-2.78939	-2.8811	2.05155	-1.2748	-0.711135	2.73348	0.801371	-0.668933	0.196796	-2.16417	1.29461	1.28741e-05	3.04618	3.84962	2.61058
	pseudo2	9467082	9467452	72	Pav_sc0000095.1_g090.1.br	BAHD acyltransferase At5g47980-like	-2.56976	-1.29536	-1.911	-1.4072	-0.507152	2.02426	3.04013	2.59827	-1.28329	1.76417	1.00082	0.382573	5.34587e-14	2.61264	4.12546	2.993
	pseudo20	6660933	6661103	72	Pav_sc0002479.1_g350.1.br	pre-mRNA-splicing factor 38A-like	-1.14292	-0.819438	-2.22752	1.21364	1.57795	0.466108	-0.426742	1.57271	3.63673	1.48615	1.41865	-1.93625	0.000158606	2.43895	3.71188	2.21785
	pseudo23	8707620	8707832	72	Pav_sc0005842.1_g030.1.mk	DNA topoisomerase 6 subunit B	-4.14423	-3.86147	-4.65058	1.76023	1.1283	-2.01676	-1.70216	1.72861	-1.98384	-2.10092	-1.47174	-1.1873	0.000310152	5.13919	4.55191	2.64454
	pseudo23	2811623	2811804	72	Pav_sc0004766.1_g040.1.mk	hypothetical protein PRUPE_ppa012557mg	-1.9024	-4.00508	-0.670406	1.55753	1.24736	0.6065	-0.343755	-0.616824	-1.30426	1.5106	1.41733	1.7359	4.43586e-07	2.83576	0.945377	3.20759
	pseudo24	2049238	2049475	72	Pav_sc0006660.1_g020.1.mk	probable 1-deoxy-D-xylulose-5-phosphate synthase 2, chloroplastic isoform X2	-2.62216	-3.23773	-5.36879	-0.91813	-2.4997	-3.67843	0.716064	-4.74772	0.439765	-3.14606	-1.5479	-1.32515	7.67119e-05	1.42196	3.37514	1.54527
	pseudo25	5870142	5870412	72	Pav_co4011889.1_g010.1.br	hypothetical protein PRUPE_ppb022847mg, partial	0.678195	-0.530551	-2.5552	-0.492911	2.32005	2.75941	3.11012	2.155	1.04156	3.3347	2.02382	2.91241	0.000136721	2.34084	2.62077	3.13841
	pseudo25	5976432	5976636	72	Pav_co4013909.1_g010.1.br Pav_co4013925.1_g010.1.mk	probable methyltransferase PMT24 23 kDa jasmonate-induced protein-like	-1.01718	-0.717233	-0.423673	2.53156	2.76098	-1.11975	2.33993	-2.34252	0.697501	3.48742	2.88305	3.56214	1.38201e-05	2.81688	1.89689	4.04034
	pseudo3	1422189	1422672	72	Pav_sc0000102.1_g700.1.br	L-ascorbate oxidase-like	-2.0274	-1.16488	2.40925	0.864629	-0.412045	1.31488	1.65147	-0.0955884	-0.494048	-3.39299	-2.65112	-2.94613	1.05197e-06	-0.246544	-0.326486	-3.96602
	pseudo3	9213105	9213287	72	Pav_sc0000136.1_g280.1.mk	LOW QUALITY PROTEIN: zonadhesin-like	-6.18846	-6.13468	-6.12844	0.645458	0.742481	0.697759	-6.15454	-0.50747	2.36247	3.11897	1.95479	0.721803	-2.84439e-12	6.84605	7.11621	8.3945
	pseudo5	731903	732091	72	Pav_sc0000218.1_g180.1.br	Unknown	-0.878611	-4.12551	-3.82945	0.683461	-1.61089	-1.0034	-1.66492	-0.897167	0.144768	0.0550222	-0.635045	2.69683	0.000144309	1.85675	1.54376	3.60421
	pseudo5	10250822	10251497	72	Pav_sc0000289.1_g310.1.mk Pav_sc0000289.1_g320.1.mk	Unknown Unknown	-1.83532	-3.41015	-3.43359	-1.635	-2.70008	-0.881579	1.4024	-2.0882	-0.335592	1.91372	-2.42823	-1.6183	0.000177072	1.1256	2.97516	3.19635
	pseudo5	10290066	10290295	72	Pav_sc0000290.1_g040.1.mk Pav_sc0000290.1_g050.1.mk	uncharacterized protein LOC103322922 isoform X1 hypothetical protein EUGRSUZ_G01684	2.02913	2.26736	3.08594	-0.914856	-1.72525	-0.601146	1.21106	-0.386512	-0.952293	1.39358	1.29378	0.821857	0.000512761	-3.54262	-2.2732	-1.34454
	pseudo6	2339689	2340097	72	Pav_sc0000317.1_g090.1.br	Unknown	-0.506794	2.17063	0.23971	-6.17869	-1.7662	-2.22909	1.65882	-1.91254	-1.43975	1.37436	-2.67004	-1.65167	0.000452761	-3.6155	-0.752179	-1.05781
	pseudo9	10122659	10123016	72	Pav_sc0000595.1_g1220.1.mk	cationic amino acid transporter 2, vacuolar	-1.78742	-4.20414	-2.08908	2.09311	-1.27083	-1.84395	1.29876	-5.30058	-5.18802	-2.25589	0.893687	-2.29907	0.000100707	3.09866	2.11783	1.97143
	pseudo9	453491	453711	72	Pav_sc0000549.1_g810.1.mk	hypothetical protein PRUPE_ppa013028mg	-0.845763	-1.08013	-0.642292	2.87154	1.96757	1.776	-0.550992	-0.105379	-0.91325	1.76906	0.173223	0.594701	0.000359277	3.13332	0.359766	1.85606
	pseudo9	4704943	4705216	72	Pav_sc0000567.1_g560.1.br	Tag=/pseudo	-2.17743	-1.04613	-2.16122	0.221637	1.18189	-0.0259334	-0.986004	0.941814	2.96565	-0.224848	-1.20511	0.373244	0.000153819	2.24946	3.46221	1.47639
	pseudo1	5452052	5452289	71	Pav_sc0000028.1_g260.1.br	Unknown	-0.488476	-3.85744	0.161029	-3.23998	1.21747	3.25485	-2.13161	2.711	3.82244	-1.3165	1.94923	-2.62865	0.000412127	2.65629	3.46114	1.21975
	pseudo1	1851587	1851741	71	Pav_sc0000009.1_g930.1.mk	protease Do-like 9	-1.0379	0.0604749	0.0691231	1.01881	-3.15658	1.89523	2.52977	3.23001	2.65079	1.79522	1.43213	2.15228	4.57953e-05	1.18368	3.05531	2.04119
	pseudo10	7745076	7745540	71	Pav_sc0000659.1_g590.1.br	Unknown	-2.00937	-1.57627	-3.35493	-0.750795	0.626033	0.240249	0.927816	0.314455	-0.121129	1.65493	0.250453	0.647027	0.00171179	2.28394	2.57668	3.11512
	pseudo12	6071223	6071563	71	Pav_sc0000843.1_g770.1.br	Unknown	-1.7455	-3.38287	-1.45464	-2.86162	0.193068	-0.654604	1.46198	1.43531	0.697697	-0.381041	1.39877	-1.78495	0.000275675	1.33606	3.22193	2.28345
	pseudo13	5498126	5498336	71	Pav_sc0000967.1_g070.1.br	probable E3 ubiquitin-protein ligase HERC2	-3.5984	-0.55501	-4.14987	-0.639196	-4.86091	2.73765	-1.67308	1.71622	0.33643	-2.66323	1.52168	0.630405	4.45142e-05	3.16412	2.56864	2.48154
	pseudo13	7038916	7039387	71	Pav_sc0000981.1_g350.1.mk	putative receptor-like protein kinase At1g80870	-5.48804	-2.85999	-5.59745	-3.04724	-2.31714	-1.44594	-4.18922	-1.20916	-0.725717	0.542105	1.05799	1.54135	0.000274318	1.93047	2.59556	5.15756
	pseudo14	2764602	2765131	71	Pav_sc0001057.1_g120.1.br	dynamin-related protein 4C-like	-3.12298	-3.53716	-4.47358	-0.544906	-0.245144	-2.63267	-0.224932	-0.548721	-0.0249307	0.990787	-0.120527	1.50056	0.000273246	2.78101	3.35828	4.54385
	pseudo14	8978737	8979229	71	Pav_sc0001114.1_g200.1.br	heat shock protein 90-2	-0.778268	-3.74452	-2.2028	-1.38979	2.40967	1.59275	-1.81993	-3.07332	-1.84525	-0.930027	0.310032	-2.13416	0.000291214	3.31573	-0.362827	1.18732
	pseudo15	6512489	6512896	71	Pav_sc0001236.1_g420.1.mk	GDSL esterase/lipase At1g09390-like	-0.472707	-2.37995	-1.32305	-1.0625	-2.39497	0.360537	1.55364	-3.61071	3.04553	-1.72408	-4.22222	0.11829	0.000252557	0.573343	3.10269	0.135563
	pseudo15	8944572	8944789	71	Pav_sc0001268.1_g020.1.br	hypothetical protein PRUPE_ppa022675mg, partial	-0.369987	-2.95837	-1.3074	-0.208445	0.857686	1.36347	-0.094416	2.13577	1.48588	1.60842	-0.231725	2.75599	0.00020999	2.00679	2.63795	3.02788
	pseudo15	5016017	5016230	71	Pav_sc0001214.1_g030.1.br	Unknown	-4.69926	-4.6146	-4.81185	-4.90245	-4.94209	-4.89885	1.93167	-5.03228	1.42776	3.10401	2.91343	2.83967	4.65549e-06	-0.208016	5.82972	7.66304
	pseudo15	8344392	8344581	71	Pav_sc0001258.1_g530.1.br	Unknown	2.79104	0.475707	-1.32613	-2.63426	1.05103	-1.07256	-1.07066	-2.53928	-6.64386	-0.564546	-3.45579	1.19856	8.51226e-05	-1.68527	-3.72635	-1.50812
	pseudo16	5992917	5993318	71	Pav_sc0001369.1_g660.1.mk	hypothetical protein glysoja_015170	-2.15318	-3.59235	-2.45824	1.63844	0.263211	-0.638571	0.796083	-2.29807	-2.65854	-3.81219	0.0812674	-0.862274	0.00120238	3.33916	2.09913	1.77784
	pseudo16	6412655	6413081	71	Pav_sc0001386.1_g020.1.br	Unknown	-2.73704	-3.89925	-3.93805	-4.1331	1.08819	-0.328518	-2.01052	-2.33446	-0.187698	-0.236039	-5.19227	-0.0372201	0.000619198	3.39995	2.23033	2.7132
	pseudo17	1446863	1447048	71	Pav_sc0001478.1_g140.1.mk	Unknown	-0.579974	-0.697128	-1.67072	-2.4071	-1.76452	1.57005	1.12006	1.27772	-3.61042	2.48449	-0.422806	3.4424	0.000322947	1.10948	1.54855	3.42749
	pseudo18	5457029	5457330	71	Pav_sc0001801.1_g280.1.mk Pav_sc0001801.1_g290.1.br	ferredoxin, root R-B1 cytochrome P450 94A1-like	-1.4696	-0.672234	3.13482	-1.3446	-2.36522	-1.1289	0.610189	1.49751	-0.608652	1.05273	-0.875183	-2.89808	0.000135552	-3.22503	-0.965083	-1.82728
	pseudo18	8754917	8755169	71	Pav_sc0001869.1_g550.1.br	Unknown	-3.67768	-4.04778	-3.23178	1.39313	3.52619	2.79133	2.0917	0.697167	2.82792	0.850823	-0.922705	1.40888	2.83217e-11	6.42593	5.7275	4.34679
	pseudo19	5569714	5569899	71	Pav_sc0002119.1_g090.1.br	hypothetical protein VITISV_003804	-0.690247	-2.14119	-1.50917	2.86619	2.03473	2.00743	-1.72659	-0.637835	1.308	-0.387082	-1.47364	2.9403	0.000134552	3.68542	1.51401	2.87725
	pseudo19	6325829	6326064	71	Pav_sc0002156.1_g080.1.mk	rop guanine nucleotide exchange factor 9	-0.613867	-1.59881	-2.24004	0.301668	-1.75118	-0.62803	0.828289	0.557101	-1.56585	0.46476	1.09014	2.97459	0.00257033	0.864795	1.5845	3.24974
	pseudo23	8563721	8563852	71	Pav_sc0005810.1_g020.1.mk	extensin-2-like, partial	-6.64386	-6.64386	-6.64386	-6.64386	2.03784	-6.64386	2.30697	0.70948	3.93229	3.03288	-6.64386	-6.64386	-4.09687e-13	7.10374	9.50846	8.09529
	pseudo23	5072109	5072382	71	Pav_sc0005166.1_g020.1.mk	ras-related protein Rab7	-1.70376	-2.36705	-3.19704	-1.4355	1.84769	-2.62229	0.784851	0.879999	0.425644	1.18237	1.94106	0.422806	6.54045e-05	2.76004	3.00811	3.61065
	pseudo25	7024517	7024866	71	Pav_co4033801.1_g010.1.br	LOW QUALITY PROTEIN: LRR receptor-like serine/threonine-protein kinase GSO2	-1.33709	-1.11124	-1.86641	0.48123	1.32803	0.883761	1.63938	-2.22526	1.22798	1.1333	3.25349	1.33472	0.000557688	2.34388	2.32364	3.65304
	pseudo25	2695263	2695752	71	Pav_sc0011077.1_g020.1.br	serine/threonine-protein phosphatase 7 long form homolog	0.93197	-2.12877	1.55763	-0.909835	-2.05644	-1.79832	-0.050074	-2.98291	-4.47044	-1.29354	-4.09925	-3.09964	0.00321867	-2.2606	-2.15904	-3.12344
	pseudo25	5158328	5158539	71	Pav_co3997769.1_g010.1.br	uncharacterized protein LOC103336964	0.953206	-0.549086	2.42531	-1.46566	-0.804688	-0.0468411	1.22394	0.966175	0.973108	-1.86889	-3.32209	-1.31107	0.000383614	-2.07041	-0.35394	-3.36278
	pseudo3	7314750	7315064	71	Pav_sc0000129.1_g1130.1.br	flavonoid 3'-monooxygenase-like	-2.98269	-3.83647	-5.00203	1.65526	0.254148	1.79009	-2.70449	-1.48572	-0.377144	-0.0397721	-3.40835	0.152639	2.26782e-06	5.09831	2.49133	3.25809
	pseudo4	4967892	4968088	71	Pav_sc0000183.1_g180.1.mk	DEAD-box ATP-dependent RNA helicase 56-like	-2.41587	-1.61111	-2.23551	-0.818164	1.03288	2.15094	2.18084	-1.72768	-0.0443513	1.05345	1.24631	-3.04504	8.91451e-08	3.27834	2.99731	2.65168
	pseudo4	1311714	1311939	71	Pav_sc0000157.1_g170.1.mk	Unknown	-3.98241	-4.27558	-2.04224	-4.31018	-2.62797	2.4395	-4.46776	-2.83187	-0.500654	3.30909	0.356964	0.719692	0.000114543	3.97809	1.31904	5.16569
	pseudo4	5323808	5324588	71	Pav_sc0000184.1_g240.1.br	Unknown	-1.42951	-5.65329	-6.06252	2.63845	-1.30783	0.849937	-3.28347	-3.91047	-4.78146	0.690447	-1.95933	-1.22429	0.000511401	4.37618	-0.982205	2.5011
	pseudo4	368816	369177	71	Pav_sc0000147.1_g030.1.br	uncharacterized protein LOC103326348	0.638982	1.82658	2.28105	-0.13457	1.11151	-1.57403	-0.449461	-1.326	-5.23209	-2.20248	-0.942491	0.522732	-3.00376e-12	-1.54807	-3.10542	-2.19627
	pseudo5	3440502	3440934	71	Pav_sc0000233.1_g090.1.br	Unknown	-1.52651	-1.20028	-0.938819	0.679035	1.9308	2.90457	-0.135947	0.310227	0.985388	0.544509	0.359515	1.50641	0.000478125	3.30658	1.66317	2.09802
	pseudo6	8692405	8692558	71	Pav_sc0000363.1_g110.1.br Pav_sc0000363.1_g120.1.mk	Unknown pentatricopeptide repeat-containing protein At5g12100, mitochondrial	-0.589617	-1.95402	-1.61739	-2.43046	-1.26332	1.1776	1.91533	-1.1907	-0.456317	0.503641	0.298164	3.0514	0.00123929	1.19784	1.98396	3.13098
	pseudo7	4725309	4725538	71	Pav_sc0000405.1_g720.1.br	small subunit processome component 20 homolog	-2.23819	-2.69449	-3.56816	-0.654513	0.452503	-0.762512	-0.0938436	-1.29946	1.16577	-1.87103	2.03588	1.27199	0.000297003	2.52434	2.99233	3.91283
	pseudo8	1789702	1790102	71	Pav_sc0000480.1_g360.1.br	Unknown	-1.79047	-5.28711	-5.26633	-0.834027	0.312699	-3.45153	0.428379	-5.78597	0.676927	-1.84542	-2.34547	-2.6363	0.000112077	2.47529	3.1204	0.900364
	pseudo8	2781098	2781369	71	Pav_sc0000482.1_g390.1.br Pav_sc0000482.1_g400.1.mk	uncharacterized protein LOC103342992 hypothetical protein CISIN_1g041832mg	-1.6521	-3.3696	-2.69111	-1.36072	0.772932	0.502613	1.44737	2.04665	1.74827	-2.68635	1.49257	-3.24347	9.94585e-05	2.62503	4.1646	2.43206
	pseudo9	4077844	4078509	71	Pav_sc0000563.1_g020.1.br	Unknown	-4.18258	-2.80336	-3.40057	-0.203982	-2.00843	1.72942	2.37623	-3.34975	-0.987632	-0.858857	1.51758	-2.03688	3.57829e-09	3.9191	4.30554	3.64206
	pseudo10	10126201	10126444	70	Pav_sc0000677.1_g140.1.br	uncharacterized protein LOC103330686	-3.08601	-2.49325	-2.25122	0.230862	3.27211	2.90498	2.91991	2.31415	0.273318	2.11547	1.23262	2.79668	1.32524e-07	5.18013	4.76578	4.75334
	pseudo11	8464439	8464747	70	Pav_sc0000755.1_g310.1.mk	protein ALWAYS EARLY 3	-2.9196	-1.79645	-5.21443	-3.31185	-0.766277	-2.85324	0.900174	-1.24487	-4.08709	-0.690911	-0.523022	1.8368	1.13343e-13	0.887708	2.39258	3.45082
	pseudo11	8158539	8158791	70	Pav_sc0000754.1_g620.1.br	Tag=/pseudo	-0.347681	-2.9948	-1.65914	-0.0248533	2.2105	2.13852	0.340255	0.371733	0.333669	1.99775	0.73798	-0.911746	0.0015111	3.02778	1.63739	2.33445
	pseudo12	10932846	10933079	70	Pav_sc0000882.1_g260.1.mk	carotenoid 9,10(9',10')-cleavage dioxygenase 1	-1.58599	-3.44633	-0.421165	-2.5484	0.512352	-0.227684	2.02183	0.89711	-3.28373	-1.73543	3.05759	1.88784	0.000829322	1.06501	2.36265	3.39519
	pseudo12	7971707	7971954	70	Pav_sc0000858.1_g280.1.br	hypothetical protein PRUPE_ppa021183mg	1.96018	1.23773	2.03075	-1.23299	-4.36792	-2.58605	-0.476915	-3.15066	1.12879	1.83038	-3.29111	-0.963216	0.00049977	-4.01248	-1.77601	-1.30902
	pseudo12	552704	552902	70	Pav_sc0000788.1_g020.1.mk	laccase-15-like	0.87748	3.22136	2.11418	-1.09439	1.54537	1.20614	1.77512	1.94735	0.45148	-2.95329	0.333894	-0.910623	1.50635e-06	-1.44404	-0.841406	-3.01135
	pseudo12	7622125	7622449	70	Pav_sc0000852.1_g920.1.mk	LOW QUALITY PROTEIN: pentatricopeptide repeat-containing protein At2g04860	-2.79854	-2.0609	-1.15656	2.21414	0.931009	1.28957	-0.598746	-3.10111	-0.892366	-1.90473	-1.74419	-0.0142009	0.00145079	3.43389	0.661096	0.903008
	pseudo13	1277032	1277473	70	Pav_sc0000890.1_g770.1.mk	Unknown	-1.03818	-3.25116	-1.66696	0.379395	0.715694	0.62231	0.577268	0.259629	-1.1471	0.51717	1.49603	2.36417	0.00118806	2.30528	1.7921	3.37372
	pseudo14	3494136	3494458	70	Pav_sc0001065.1_g030.1.br	putative disease resistance protein RGA3	-4.71099	-4.12492	-2.47244	-1.60275	-0.60769	-0.841761	1.59794	-5.18834	-1.6197	0.591698	-0.724782	-1.06449	3.97097e-05	2.48508	3.61591	3.23201
	pseudo17	2681033	2681253	70	Pav_sc0001502.1_g080.1.mk	Unknown	-2.39087	-4.24567	-3.05209	-1.3329	0.411191	1.38565	2.00318	-3.20267	-4.49937	-0.747128	1.03702	0.447295	0.000128235	3.57577	3.51535	3.46225
	pseudo17	9733830	9734452	70	Pav_sc0001644.1_g190.1.br	trans-resveratrol di-O-methyltransferase-like	-3.25944	-3.58208	-2.78808	-0.615694	1.4217	-0.108383	1.24239	-1.79788	0.926381	0.195775	-1.74252	-1.88678	0.00115848	3.67829	3.77482	2.36555
	pseudo18	7656423	7656690	70	Pav_sc0001846.1_g070.1.br Pav_sc0001846.1_g080.1.br	Unknown putative wound-induced protein	-2.63839	-1.65265	-1.5412	1.8893	-1.18055	2.24908	1.60147	-0.274722	-0.279587	0.339151	1.21341	-4.12295	0.000104856	3.43606	2.51036	2.14676
	pseudo19	3119022	3119287	70	Pav_sc0002012.1_g020.1.br	Unknown	-2.08711	-1.49646	-2.18051	-0.495824	-0.910122	2.46364	1.63067	-2.55177	-2.73242	-4.70463	-2.34856	-2.10091	6.1877e-05	3.05981	2.07633	-0.792675
	pseudo2	3289625	3289806	70	Pav_sc0000065.1_g260.1.mk	ABC transporter B family member 11-like	-1.18192	0.0399629	-3.74016	-1.20514	-3.47404	2.37921	1.04841	-0.249517	-0.729448	-0.797996	3.14808	1.98328	-3.14404e-12	1.89121	1.18615	3.11711
	pseudo2	10520156	10520360	70	Pav_sc0000096.1_g250.1.br	hypothetical protein PRUPE_ppa018034mg	-0.316243	-2.96461	-1.3453	1.89254	2.46764	3.55982	1.3078	2.91962	2.75758	0.307327	0.218823	2.34087	0.000118875	3.98904	3.66498	2.49477
	pseudo20	4016890	4017202	70	Pav_sc0002388.1_g060.1.br	L-type lectin-domain containing receptor kinase IX.1	-0.648771	-2.63917	-4.87493	0.614489	-1.92925	1.43513	2.43201	1.6089	0.397239	1.9742	-0.976339	0.818108	0.000581045	2.43378	3.55202	2.89699
	pseudo20	9129968	9130180	70	Pav_sc0002598.1_g150.1.mk	uncharacterized protein DDB_G0274915	-2.03393	-3.41389	-2.68409	-0.485296	-3.57292	-0.290884	-4.53921	-1.48346	-1.36842	0.668907	0.376011	1.3945	0.000216316	1.71078	0.674734	3.48233
	pseudo22	5249235	5249525	70	Pav_sc0003734.1_g110.1.mk	protein FAR1-RELATED SEQUENCE 3-like	-3.45001	-3.65827	-5.22872	0.239904	0.753861	-3.41706	-1.8438	-1.2844	-4.87983	1.41248	-1.28929	-3.57871	0.000106512	3.90697	1.87322	3.99852
	pseudo23	10202064	10202337	70	Pav_sc0006094.1_g010.1.mk	TMV resistance protein N-like	-2.36917	-1.13807	-3.75882	-2.44295	1.18965	-0.335584	1.74129	0.129137	1.97501	-1.84202	1.71066	-0.576475	0.000500104	2.17403	3.53527	2.54848
	pseudo24	9096522	9096771	70	Pav_sc0008884.1_g010.1.br	receptor-like protein 2	-2.98089	-1.81817	-2.21163	0.928091	3.33505	0.56741	-0.518697	1.53392	-3.34036	-0.181949	-0.199466	3.06238	0.000327028	4.42777	2.56003	4.01258
	pseudo4	5047750	5048030	70	Pav_sc0000183.1_g310.1.mk	uncharacterized protein LOC103341962	-3.30255	-5.8641	-4.25672	-1.40477	-6.3939	1.3827	-0.64356	-5.70821	-3.52158	1.0229	-3.31826	-0.293009	5.21258e-09	4.13293	2.12724	4.1093
	pseudo5	3223985	3224161	70	Pav_sc0000231.1_g1060.1.mk	L-type lectin-domain containing receptor kinase S.1	-2.94532	-3.5395	-2.54702	-3.64246	-2.49646	2.37062	-0.24306	1.51096	2.63801	3.5514	1.79207	-1.10905	8.16788e-05	3.8105	4.68012	5.33799
	pseudo6	6519883	6520082	70	Pav_sc0000352.1_g120.1.br	Unknown	-3.62384	-3.50421	-4.02958	-2.48764	-3.98965	2.81774	0.900609	-2.23721	-3.65562	-0.169854	-3.17989	2.95887	1.29135e-08	4.98357	3.22718	5.2506
	pseudo7	8805133	8805660	70	Pav_sc0000449.1_g360.1.mk	pre-rRNA-processing protein TSR2	-3.65347	-5.85818	-5.29543	-0.778728	-5.49048	-1.6211	0.912111	-2.13765	-2.68957	-0.35589	-4.36174	-2.11519	0.000490489	2.92866	4.21194	3.11824
	pseudo8	9044404	9044656	70	Pav_sc0000535.1_g360.1.br	Unknown	0.394233	0.290387	1.70156	0.264229	1.43674	1.07383	-2.10072	-0.218196	-0.153007	-1.49188	-2.79945	-2.37996	1.66042e-05	0.0546064	-1.53917	-3.06611
	pseudo8	5854915	5855204	70	Pav_sc0000500.1_g280.1.mk	PHD finger protein At1g33420	2.07462	1.86261	-4.25672	-1.81388	0.453317	-1.61624	-2.34558	-0.970283	-2.35757	-2.05686	1.08708	-1.99631	4.70136e-05	-1.99674	-3.13045	-1.59505
	pseudo8	2795650	2795877	70	Pav_sc0000482.1_g430.1.br	zinc finger BED domain-containing protein RICESLEEPER 2-like	-0.780863	1.39879	3.2271	-3.79563	-1.92618	2.13075	-2.64354	-1.41918	-2.13097	1.0455	-2.71868	-2.23918	0.000334327	-1.41624	-4.04501	-2.37371
	pseudo9	4622355	4622527	70	Pav_sc0000567.1_g430.1.mk	histidine triad nucleotide-binding protein 3	-0.759724	0.364784	-0.425346	0.892781	1.29981	1.86633	1.94082	-0.696917	1.29825	3.75796	2.78813	1.02045	0.00029479	1.60244	1.39862	3.09839
	pseudo9	3736620	3736959	70	Pav_sc0000558.1_g590.1.br	hypothetical protein CICLE_v10003272mg, partial	-2.46749	-3.69193	-2.6271	-2.09138	1.14934	1.609	2.72208	-0.735396	-1.2567	-0.880308	-1.42304	0.376479	8.27845e-05	3.71162	4.18065	2.39824
	pseudo9	7536553	7536990	70	Pav_sc0000584.1_g540.1.br	receptor-like protein 2	-2.23587	-4.69865	-3.16934	-1.33965	-0.593235	1.53592	-0.0801177	-2.7354	0.353683	-0.422378	-0.404457	2.42784	0.000302088	3.45076	2.7134	4.24906
	pseudo1	10429751	10430165	69	Pav_sc0000045.1_g450.1.br	Unknown	-3.09941	-1.11315	-2.31162	0.365582	1.34123	1.42592	1.89538	0.567902	-2.32681	-1.57326	-3.53518	0.800126	0.000654581	3.06015	2.79119	1.47113
	pseudo10	9694035	9694244	69	Pav_sc0000675.1_g720.1.mk	(+)-neomenthol dehydrogenase-like	0.658973	-3.23004	-0.425837	2.00092	3.26648	2.80729	1.2872	-0.0823408	1.62313	0.0430185	0.966035	1.01896	0.000636487	3.08541	1.41184	1.04394
	pseudo10	548156	548558	69	Pav_sc0000600.1_g980.1.mk	AT-rich interactive domain-containing protein 5 isoform X1	-3.38833	-3.97671	-3.00838	-1.51578	-3.76282	-1.15658	-0.252763	-1.65131	2.35049	2.02791	2.02347	-0.990571	0.000614866	1.62194	4.46523	4.93183
	pseudo10	5570763	5571013	69	Pav_sc0000638.1_g1030.1.mk	probable LIM domain-containing serine/threonine-protein kinase DDB_G0287001	-1.48491	-5.56661	-2.75309	-0.163114	-2.06865	2.42265	0.141496	0.862223	-1.29178	-1.70684	-1.31771	-0.871068	3.72475e-05	3.62383	2.66017	1.25176
	pseudo10	8386435	8386738	69	Pav_sc0000663.1_g340.1.br	putative ribonuclease H protein At1g65750	-1.55791	-2.11975	-2.39858	-1.43977	-0.135198	-0.0655527	0.679886	0.883348	1.91066	0.618668	-0.955725	-2.38478	0.000154356	1.55722	3.2464	1.56222
	pseudo12	3296661	3297350	69	Pav_sc0000816.1_g330.1.br	uncharacterized protein LOC103329348	-2.53124	-1.61134	-4.64104	-2.69796	0.993972	-0.855533	1.20133	-1.79138	-2.19069	1.45703	0.788042	2.615	1.08442e-05	2.32012	2.37727	4.29377
	pseudo12	10065457	10065772	69	Pav_sc0000877.1_g680.1.br	uncharacterized protein LOC103334244	-2.13754	-3.86136	-2.54612	0.0974538	1.43587	0.58825	-0.486599	-0.954506	-3.85442	-2.75869	-2.97843	0.00272077	0.000767842	3.49782	1.47487	1.44985
	pseudo14	2775698	2775951	69	Pav_sc0001057.1_g140.1.br	dynamin-related protein 4C-like	-2.75254	-1.40941	-4.6572	1.79011	-2.59029	0.978476	-1.20777	-3.09459	-3.58294	0.666226	1.02816	2.83679	1.59545e-05	3.30909	0.166306	4.25402
	pseudo16	9449223	9449449	69	Pav_sc0001422.1_g070.1.mk	hypothetical protein PRUPE_ppa013214mg	1.29053	1.52645	0.176553	-0.583098	0.173913	-3.03928	0.198488	0.760459	-1.78455	-2.30549	-2.85782	-1.32996	1.44882e-06	-1.75183	-1.0439	-3.12917
	pseudo16	2301090	2301353	69	Pav_sc0001309.1_g1300.1.br	putative ribonuclease H protein At1g65750	-2.03746	-5.89027	-1.06727	0.608284	-0.570247	0.343726	2.57188	-0.375705	1.55217	0.0586084	-0.726628	2.16317	2.62941e-05	2.23262	3.70934	3.05359
	pseudo17	5327769	5328022	69	Pav_sc0001539.1_g460.1.mk	cyclic nucleotide-gated ion channel 1-like	0.187054	0.868831	0.268347	-3.84732	-3.1167	-2.98696	1.02569	-0.254003	-4.25513	1.26444	-4.13119	-1.10153	5.34587e-14	-3.7452	-0.510356	-0.511067
	pseudo17	830961	831263	69	Pav_sc0001467.1_g030.1.mk	probable 2-oxoglutarate-dependent dioxygenase AOP1	-1.23849	-1.31929	-4.34006	-0.612813	1.55133	1.78696	-1.34818	-3.52935	-2.36523	-0.544372	-0.0682175	-0.703578	0.000157341	3.00911	-0.37587	1.36662
	pseudo18	6744010	6744406	69	Pav_sc0001825.1_g400.1.br	small nuclear ribonucleoprotein E	-4.54709	-1.61285	-2.58505	-0.373444	0.998142	1.44805	0.0739512	-2.83169	-0.429667	0.844231	-0.116892	-1.10645	2.69779e-06	3.3575	1.85136	2.56856
	pseudo2	3018291	3018595	69	Pav_sc0000065.1_g060.1.mk	pentatricopeptide repeat-containing protein At3g06430, chloroplastic	-2.38033	-0.943513	-2.47119	1.46609	1.13457	1.57737	0.646768	-0.569713	2.21036	1.87769	0.991813	0.167252	0.000162445	3.15388	2.94403	2.92694
	pseudo2	9050221	9050361	69	Pav_sc0000094.1_g520.1.mk	syntaxin-71	2.57048	-2.29257	1.60055	-2.38207	-0.716003	-2.30355	-3.92077	-0.67253	-0.461115	-0.297383	-5.10791	2.18994	0.000192083	-3.19341	-2.69224	-0.763537
	pseudo20	276857	277076	69	Pav_sc0002296.1_g030.1.mk	Unknown	-0.728639	-1.48919	-2.53145	0.682368	1.56471	1.64378	2.06156	2.27414	0.785387	0.31267	-1.11989	-0.582416	7.59918e-05	2.76286	3.24455	1.06517
	pseudo20	8978418	8978795	69	Pav_sc0002597.1_g020.1.br	Unknown	-3.26965	-1.54016	-5.44748	1.58562	-0.209011	0.64631	-2.23949	-3.15484	-2.63285	-1.09354	-2.6627	-3.26568	8.79253e-05	3.52927	0.044726	0.634853
	pseudo21	3353603	3353791	69	Pav_sc0002839.1_g460.1.br	hypothetical protein PRUPE_ppa023065mg, partial	-2.83456	-3.81304	-4.11469	0.553854	-2.57163	-3.69337	-2.86743	1.27142	3.52515	2.2056	-2.63962	2.44992	0.000179017	2.67096	5.7079	5.24972
	pseudo21	5683171	5683550	69	Pav_sc0002963.1_g080.1.mk	probable NOT transcription complex subunit VIP2 isoform X1	-1.03582	-2.86979	-2.88734	0.217232	0.666202	0.201262	1.5538	-0.37589	2.36501	-0.730175	-0.985554	-2.51336	1.98377e-09	2.35964	3.54349	0.756032
	pseudo22	1335951	1336219	69	Pav_sc0003426.1_g060.1.mk	Unknown	-1.49093	-3.34202	-4.01307	-0.377212	0.422359	-1.1162	1.63002	0.502728	1.33417	-1.74677	-0.795799	-0.146039	0.000628404	2.31614	3.76783	1.78364
	pseudo23	9667268	9667860	69	Pav_sc0006044.1_g010.1.mk	electron transfer flavoprotein-ubiquinone oxidoreductase, mitochondrial	-2.40633	-3.93984	-4.58705	-0.141056	-2.27504	-3.49189	-2.74993	-1.27577	-5.22015	1.42186	-2.36581	-0.0656071	0.000131712	2.0251	0.994332	3.69616
	pseudo23	5068061	5068483	69	Pav_sc0005166.1_g010.1.mk	iron-sulfur assembly protein IscA, chloroplastic	1.35954	0.0697506	0.833776	0.879478	-1.68835	1.09528	1.09667	-1.48016	-2.33291	-2.9655	-3.26939	-1.59593	0.000608807	-0.332591	-1.00183	-3.26237
	pseudo23	6476472	6476710	69	Pav_sc0005443.1_g150.1.br	Unknown	0.675931	0.375366	2.73159	-0.418012	-0.86759	-0.422238	0.374528	-0.149599	2.3867	-1.2065	-0.876569	-3.84866	0.000272918	-2.22295	-0.360602	-3.18668
	pseudo24	8036457	8036664	69	Pav_sc0008477.1_g010.1.br	Unknown	2.13676	2.09429	0.916462	0.131365	-3.23501	-3.50849	1.18555	-0.271719	1.27841	0.645069	0.973767	0.743602	0.000491177	-3.0332	-0.933003	-1.0208
	pseudo24	5202365	5202674	69	Pav_sc0007440.1_g010.1.br	receptor-like protein 12	-1.10623	-0.474353	-5.73376	-6.03712	2.74818	3.42716	3.62628	2.50905	-0.949542	0.887252	1.23638	2.75845	8.09488e-07	3.86177	3.9473	3.18906
	pseudo24	6708150	6708334	69	Pav_sc0007973.1_g010.1.br	subtilisin-like protease	-3.9716	-4.27352	-4.26884	2.86844	0.618637	2.96649	2.5668	3.98729	2.98146	3.39169	2.66157	3.80758	7.94424e-07	6.63713	7.47083	7.52531
	pseudo3	5461162	5461661	69	Pav_sc0000119.1_g520.1.mk	putative pentatricopeptide repeat-containing protein At3g23330	-2.09549	-3.6682	-2.23928	-0.270249	0.958758	1.51596	0.923306	0.217518	1.5075	-0.163542	0.863645	0.512784	0.002681	3.42497	3.49244	2.98052
	pseudo3	8726859	8727084	69	Pav_sc0000131.1_g850.1.mk	zinc finger protein CONSTANS-LIKE 4	-0.911664	-2.01863	-2.98507	-0.869472	1.20722	0.370502	-0.972048	-3.06618	-0.529322	-0.0799071	2.84923	1.2699	0.000104496	2.19733	0.547329	3.54559
	pseudo5	9824881	9825093	69	Pav_sc0000287.1_g740.1.br	Unknown	-3.88423	-3.69216	-3.93122	-3.76384	3.34669	-0.176985	-1.70794	1.30816	-2.64432	1.88466	-3.88312	2.47293	0.000175768	5.7237	3.80409	5.46626
	pseudo7	3069787	3070029	69	Pav_sc0000396.1_g210.1.mk	Unknown	-0.868867	-1.56786	-3.90191	-0.567832	-0.979651	2.1413	1.11668	1.11346	-0.393982	1.51339	0.0617746	2.58431	6.00272e-05	2.555	2.41985	3.37812
	pseudo7	5893859	5894067	69	Pav_sc0000412.1_g460.1.mk	TMV resistance protein N-like	-5.45454	-4.75988	-3.53329	-1.96018	0.740207	-1.02875	-2.76087	-4.2478	1.10141	-2.4645	0.656582	-1.57279	1.43126e-07	4.04866	4.0052	3.84115
	pseudo8	7563603	7563802	69	Pav_sc0000507.1_g140.1.br	hypothetical protein PRUPE_ppa025958m1g, partial	-2.20566	0.435622	-0.525675	0.456921	3.23573	1.99251	2.33781	2.25637	1.37538	3.45363	1.52431	2.24819	1.37211e-05	2.70597	2.45666	3.03711
	pseudo8	2073173	2073559	69	Pav_sc0000480.1_g770.1.mk	Unknown	-0.317946	-1.89658	-4.04452	1.88123	-1.35725	-0.135192	-0.27933	-0.268059	-1.02626	-1.02563	2.42673	1.7669	0.00367586	2.13943	0.923143	3.03465
	pseudo1	6127578	6127912	68	Pav_sc0000029.1_g160.1.mk	hypothetical protein PRUPE_ppa014087mg	-0.333896	-2.53619	-3.27791	0.991212	2.52173	0.639137	1.98684	0.0277779	-1.0637	-2.07011	0.212509	0.693379	0.000679485	3.11925	2.3532	1.49553
	pseudo1	9002296	9002522	68	Pav_sc0000040.1_g970.1.mk	zinc finger protein CONSTANS-LIKE 6-like	-3.22654	-3.48725	-2.69918	0.63879	0.56217	-1.65918	0.193011	1.38776	0.192873	0.153915	-3.35917	1.2151	0.000208	3.25884	3.80826	3.33495
	pseudo11	9187890	9188393	68	Pav_sc0000759.1_g350.1.mk	hypothetical protein PRUPE_ppa002136mg	1.74324	1.02862	0.132485	-1.67481	-0.42304	-1.13661	-1.05964	-2.66632	-3.7986	0.706302	-3.83734	0.0567645	0.000850993	-2.09866	-3.19277	-1.24184
	pseudo11	9071013	9071415	68	Pav_sc0000759.1_g140.1.br	Unknown	2.50879	0.751152	2.39022	1.49256	0.978383	1.76155	2.24598	0.813368	1.01164	-0.550432	-1.64772	-1.86211	0.000163542	-0.62611	-0.566924	-3.30449
	pseudo12	4545337	4545788	68	Pav_sc0000830.1_g050.1.mk	cysteine-rich receptor-like protein kinase 10	-3.14412	-4.2224	-3.18593	-2.6686	-1.93877	0.288943	0.0653988	1.14561	-5.32787	-3.39029	-2.05719	-2.81436	0.000103487	2.56784	3.56958	0.788811
	pseudo12	3515824	3516336	68	Pav_sc0000820.1_g060.1.br	Unknown	-2.60121	-3.64519	-2.35259	1.58411	-1.09274	0.480247	-1.93906	-0.950877	-1.0784	-2.51488	-2.65369	-1.65449	0.000204732	3.46429	1.50656	0.564612
	pseudo13	2117337	2117575	68	Pav_sc0000893.1_g780.1.mk	probable xyloglucan endotransglucosylase/hydrolase protein 28	-0.630726	-3.90161	-2.24079	-2.03648	1.07951	-0.515817	2.52863	2.06772	-0.138928	1.46718	1.61057	1.02692	0.00053175	1.72538	3.55589	3.08735
	pseudo13	10745831	10745966	68	Pav_sc0001024.1_g100.1.br	uncharacterized protein LOC103328417	3.03644	2.49839	3.462	0.769525	0.465312	1.56851	-0.446381	-1.23703	0.0122278	3.04324	1.96026	1.26869	0.000332794	-2.03937	-3.52116	-0.774246
	pseudo14	10880645	10881228	68	Pav_sc0001141.1_g230.1.br	putative disease resistance protein At3g14460	-2.37422	-2.60221	-1.99625	0.958155	0.790782	0.624309	-1.68924	-1.26176	-2.61378	1.06013	-2.42596	-0.0267605	0.000460005	3.09982	0.550025	2.41904
	pseudo15	1485083	1485620	68	Pav_sc0001175.1_g380.1.br	Unknown	-2.90653	-3.49433	-3.57986	-2.36913	-3.67001	-1.2833	0.704421	-2.27849	0.686772	-1.17755	-3.44535	-0.528328	0.000395163	1.15958	3.49429	2.00511
	pseudo16	3559687	3559864	68	Pav_sc0001328.1_g190.1.br	Unknown	2.73617	1.64706	-0.03661	-2.44814	-1.40857	2.19482	-1.09103	-1.35203	-1.12965	-1.20937	-2.52047	1.74258	0.000634966	-1.06765	-3.03037	-1.44595
	pseudo17	7627014	7627247	68	Pav_sc0001583.1_g250.1.br Pav_sc0001583.1_g260.1.br	uncharacterized protein LOC103324979 Unknown	-2.1523	-6.13407	-1.4349	0.207205	-0.291887	-0.487143	-3.39001	0.00841796	-2.14327	0.940754	-3.46616	1.57365	0.000445258	2.14011	1.12417	3.03339
	pseudo18	397204	397481	68	Pav_sc0001701.1_g070.1.br	hypothetical protein	-1.72185	-4.26601	-3.29571	-2.61663	0.581073	0.799335	1.63271	-3.8304	0.0182777	-2.76744	-1.6031	-0.74376	0.000377119	2.89507	3.19471	1.23177
	pseudo18	1192522	1192711	68	Pav_sc0001710.1_g890.1.br	Unknown	-2.03381	-0.215266	2.02005	0.433663	-0.454734	2.1408	0.929196	-5.29292	1.33909	-3.36594	-2.35053	-1.85075	3.55676e-06	0.330488	-0.210889	-3.17797
	pseudo19	4973914	4974086	68	Pav_sc0002100.1_g090.1.br	Unknown	-1.14509	-1.02656	-1.62017	-1.93509	0.228358	2.70451	2.94677	2.35864	-0.708575	0.935092	1.20319	0.720908	0.00239981	2.64826	3.4067	2.20863
	pseudo19	5618565	5618771	68	Pav_sc0002124.1_g020.1.br	uncharacterized protein LOC103343004	-2.63886	-3.64775	-4.17766	-3.74563	-0.104819	2.16321	1.60428	-2.06195	2.0054	1.21065	-2.54253	2.4161	2.60258e-05	4.21341	4.62518	4.72607
	pseudo19	10513247	10513502	68	Pav_sc0002271.1_g320.1.br	zinc finger MYM-type protein 1-like	-2.48725	-0.414789	-2.55409	0.252676	1.19085	3.51705	1.00333	0.991524	-1.16938	-0.185729	-2.66262	-1.27645	5.8581e-06	3.76356	2.0139	0.400143
	pseudo2	663001	663480	68	Pav_sc0000052.1_g340.1.mk	1-acyl-sn-glycerol-3-phosphate acyltransferase 3-like	-1.3669	-2.90252	-3.61531	-1.24484	-0.852161	-0.277375	1.39704	0.00394727	0.297267	-1.85905	-0.00782982	0.182647	0.000430041	1.57842	3.01211	1.99579
	pseudo2	376515	376681	68	Pav_sc0000051.1_g420.1.br	Unknown	-2.62528	-0.258146	-0.407377	2.13094	-1.11317	0.772256	0.317908	1.96228	2.01652	-1.11114	2.74293	2.99883	0.000328594	1.90236	2.39077	3.11212
	pseudo2	4234932	4235447	68	Pav_sc0000069.1_g010.1.mk	putative F-box/LRR-repeat protein At3g28410	-3.63791	-1.89696	-3.72909	0.492086	2.41532	-1.07803	0.352697	-2.12393	-2.64961	-0.934411	-1.74551	-0.535379	0.000486929	4.08792	1.97317	1.83296
	pseudo2	1804559	1804767	68	Pav_sc0000058.1_g080.1.br	uncharacterized protein LOC103331076	-0.99292	-3.74442	-3.57119	0.790335	2.02328	0.864621	2.5189	0.258084	1.42018	-0.840835	0.226797	-1.18515	0.000365903	3.52575	3.86039	1.71341
	pseudo21	727870	728150	68	Pav_sc0002716.1_g010.1.br	salicylate carboxymethyltransferase-like	-1.09437	2.58305	1.88692	-1.59544	-6.64386	-0.49288	-3.03861	2.20759	-4.19937	0.836573	0.161667	-1.71537	8.43584e-07	-3.27218	-1.08308	-1.66258
	pseudo23	3570044	3570382	68	Pav_sc0004901.1_g020.1.br	hypothetical protein PRUPE_ppa024614mg	-2.95045	-2.94173	-3.61879	0.0726043	0.629965	0.846092	0.309942	-0.562336	-0.621288	-0.941904	0.0645843	0.631016	0.00246675	3.68893	2.91254	3.19171
	pseudo3	2497448	2497976	68	Pav_sc0000103.1_g2070.1.mk	hypothetical protein L484_004290	2.10259	-1.28647	1.20506	-2.07401	-4.54754	-0.781013	-0.690596	-3.0038	-2.9005	0.376048	-1.55252	-1.99938	0.000127747	-3.02334	-2.99685	-1.89199
	pseudo4	6495060	6495449	68	Pav_sc0000195.1_g290.1.br	Unknown	-1.45907	-3.1121	-4.0357	0.431629	1.83456	-2.61026	1.11963	-2.35288	-0.329771	-2.27506	-0.248724	-0.0412918	2.76297e-05	3.23261	2.54992	1.9024
	pseudo4	7282218	7282507	68	Pav_sc0000200.1_g410.1.br	uncharacterized protein LOC103331654	-1.45003	-2.52379	-4.31166	2.04631	-0.160546	-1.40177	1.19717	0.37063	-1.73018	-0.0165724	1.97082	-1.26403	0.000153081	3.19452	2.71933	3.17334
	pseudo5	8775861	8776050	68	Pav_sc0000269.1_g360.1.mk	G-type lectin S-receptor-like serine/threonine-protein kinase At4g27290 isoform X1	-1.41277	-0.971438	-1.64049	0.291584	-0.368426	-1.51156	3.29988	2.4229	1.6704	2.23489	0.0596994	2.80463	0.000151316	0.961629	3.93052	3.40025
	pseudo5	9736166	9736656	68	Pav_sc0000287.1_g440.1.br	Unknown	-2.83893	-0.84617	-2.18109	-2.07673	-3.18178	-0.234097	-2.4223	-0.324985	-3.02907	2.1806	1.17636	-0.138653	0.000175738	0.38573	0.27288	3.07094
	pseudo6	869946	870130	68	Pav_sc0000305.1_g150.1.mk	zeaxanthin epoxidase, chloroplastic-like	2.90715	2.44483	3.37615	0.73183	2.39876	0.801607	2.41473	1.30434	-0.266576	-0.494398	0.461324	-0.537654	0.000399158	-1.42681	-1.43416	-3.07128
	pseudo7	9471458	9471641	68	Pav_sc0000464.1_g230.1.mk	Myb10 V1-2	-1.64471	-2.67078	-1.15024	-2.50073	-3.91724	2.01353	2.57417	0.146328	0.0512186	-1.57795	-2.4909	1.64462	6.7763e-08	2.20653	3.12633	1.97248
	pseudo8	2548684	2549151	68	Pav_sc0000481.1_g270.1.mk	hypothetical protein PRUPE_ppa019217mg, partial	0.703935	-0.363306	0.83198	1.27525	-0.174292	1.75126	-2.42978	-0.0907161	1.27485	-3.16125	-2.18421	-2.42527	0.00145475	0.672635	-0.240189	-3.01474
	pseudo8	400327	400522	68	Pav_sc0000467.1_g580.1.br	Unknown	-3.52946	-4.26971	-4.47965	-4.81729	1.87471	-3.62479	-4.55089	-4.84401	1.95414	0.575965	3.39584	-4.57981	9.89017e-05	4.36783	4.43069	6.03993
	pseudo9	2288947	2289180	68	Pav_sc0000554.1_g2160.1.br	hypothetical protein PRUPE_ppa026730mg	2.11302	1.69183	2.35917	1.51796	-2.85126	0.197082	-0.458826	-2.54035	-0.640016	1.96697	2.16314	2.2241	0.000430082	-1.61263	-3.04129	0.0418179
	pseudo9	9666055	9666495	68	Pav_sc0000595.1_g140.1.br	phospholipase D alpha 1-like	-1.3375	-1.89753	-2.84132	0.576785	0.585822	1.33333	-0.103519	-1.01225	-1.4074	-0.920705	-1.57503	3.22565	0.000457733	2.77802	1.16619	3.66847
	pseudo1	10600900	10601232	67	Pav_sc0000046.1_g170.1.br	hypothetical protein PRUPE_ppa023591mg	0.199282	1.69397	0.956633	-0.312854	1.26152	-0.495342	-0.192487	-1.80988	-4.85712	-2.54347	-4.13088	-1.53384	0.000142482	-0.693038	-2.40413	-3.46188
	pseudo1	148704	149264	67	Pav_sc0000002.1_g170.1.br Pav_sc0000002.1_g180.1.br	Unknown fibrous sheath CABYR-binding protein-like	-3.60335	-4.15995	-3.44424	-0.392327	-0.480669	0.217109	1.42345	-0.192297	-2.30223	-2.17965	-0.900977	-0.316235	0.00270948	3.52078	4.03054	2.76073
	pseudo11	5511288	5511575	67	Pav_sc0000731.1_g100.1.br	chlorophyll a-b binding protein of LHCII type 1-like	0.728594	0.0973557	2.15668	-1.92471	-2.99021	-1.59314	0.0724019	-1.70039	-0.575052	-0.328011	-2.69828	-3.3492	0.000344884	-3.31767	-1.82334	-2.77634
	pseudo11	8769952	8770205	67	Pav_sc0000758.1_g130.1.br	Unknown	-0.648902	-4.11511	-3.41992	-0.632767	-0.287833	-0.271506	0.0241634	1.06631	-3.63175	0.393355	2.65601	-0.0677378	0.000792859	1.53901	2.01637	3.44145
	pseudo11	8447655	8448007	67	Pav_sc0000755.1_g280.1.br	poly	-2.36272	-2.12664	-1.65179	0.473506	1.54423	1.08763	0.80409	-0.528407	-4.16289	1.75541	1.16823	1.73662	0.000200185	3.11604	1.75032	3.59404
	pseudo12	1775658	1775851	67	Pav_sc0000800.1_g630.1.br	Unknown	-0.745874	-1.11266	-0.874927	-0.448797	1.80853	2.92167	1.38315	2.66022	2.79871	2.8323	2.93164	2.41225	0.000116863	2.88057	3.30815	3.64562
	pseudo14	5276375	5276889	67	Pav_sc0001082.1_g160.1.br	putative F-box/LRR-repeat protein 23	-3.04146	-4.28575	-2.67514	-1.85325	-2.74067	-1.41478	-1.93014	-5.03188	-1.99527	-0.599204	-0.324279	0.754966	9.43691e-09	1.28322	0.723666	3.25625
	pseudo14	7523611	7524096	67	Pav_sc0001106.1_g390.1.br	T4.14	-1.64347	-2.82556	-1.6724	2.73075	0.665138	1.11028	0.842876	0.0125985	-5.53081	-0.301462	1.72119	-1.46252	0.000572538	3.74404	1.8657	2.52867
	pseudo14	1287355	1287630	67	Pav_sc0001037.1_g120.1.br	TMV resistance protein N-like	-2.79643	-2.04483	-2.20989	2.54755	1.51929	2.59615	0.851958	0.683038	-0.978716	-1.96073	-1.54337	2.74814	0.000105545	4.61468	2.70118	3.60264
	pseudo15	43230	43843	67	Pav_sc0001142.1_g090.1.br	Unknown	-0.479562	-1.65472	-1.23193	3.23898	-0.00322643	1.42906	1.79765	2.17247	0.811434	0.945447	-0.439289	1.38812	3.26004e-12	3.16848	2.73734	1.85422
	pseudo15	6271448	6271718	67	Pav_sc0001232.1_g090.1.br	Unknown	-2.62099	-2.29239	-1.84928	-1.1941	-0.274252	-0.0876301	2.05523	-0.588262	-1.15025	2.88483	-2.18145	1.74989	0.000544361	1.77515	3.03266	4.08986
	pseudo15	7068851	7069175	67	Pav_sc0001243.1_g290.1.mk	Unknown	-3.55816	-6.12647	-2.76735	-0.696896	-4.59813	-0.555769	1.12708	-1.12952	-4.55462	-1.847	-0.858379	-0.984097	0.000227049	2.44338	3.44705	2.43971
	pseudo15	10634034	10634462	67	Pav_sc0001288.1_g280.1.br	Unknown	-1.10287	-4.31062	-5.31968	1.11912	-1.82477	1.05548	-2.10222	-2.18468	0.468419	2.05716	-0.150672	0.368797	0.000275193	3.06666	1.76317	3.55385
	pseudo15	10230766	10231207	67	Pav_sc0001280.1_g350.1.mk	uncharacterized protein LOC103339189	-4.87324	-0.672982	-5.24025	-4.2269	-4.65049	1.86468	-3.49859	1.9391	1.35768	-0.706341	-0.28639	-4.57625	8.81922e-05	2.44111	3.23727	1.10043
	pseudo16	9783148	9783404	67	Pav_sc0001427.1_g020.1.br	Unknown	-1.53929	1.3535	-2.47096	-1.79609	-2.05507	-1.30486	0.131667	-1.20316	-0.00829249	-3.1283	-5.7188	-5.20454	7.67781e-07	-1.72232	-0.287014	-4.26243
	pseudo17	5758014	5758314	67	Pav_sc0001543.1_g170.1.mk	UDP-glycosyltransferase 82A1-like isoform X2	-1.90982	-2.01963	-3.64208	-0.122121	-1.33899	-0.837856	1.78474	-0.218284	-0.358581	-0.201603	-0.858379	0.0520286	0.00141955	1.66009	3.10053	2.05168
	pseudo19	1360247	1360573	67	Pav_sc0001963.1_g520.1.mk	endoribonuclease Dicer homolog 3a-like	-1.35285	-4.29847	-2.68046	0.358413	-0.351217	0.817297	0.237291	0.163419	1.86377	0.506228	-1.69388	1.39794	1.15343e-05	2.67759	3.31103	2.86686
	pseudo19	4257224	4257433	67	Pav_sc0002060.1_g110.1.br	fibrous sheath CABYR-binding protein-like	2.24411	0.930838	-0.192959	2.03428	2.28936	-1.40895	2.0377	1.65193	-2.90728	-3.56213	-1.6895	-1.12533	0.00055253	0.316216	-0.0265162	-3.1397
	pseudo2	8509521	8509740	67	Pav_sc0000093.1_g200.1.br	Unknown	-1.50173	-2.7945	-1.22997	-0.170297	-0.18101	0.87144	-0.872447	-2.97678	-0.382412	-0.253627	1.28075	2.60987	0.000633099	1.96276	0.641142	3.34317
	pseudo21	3057804	3057950	67	Pav_sc0002835.1_g170.1.mk	uncharacterized protein LOC103321842	2.8969	1.16914	3.88124	-0.629881	2.56894	1.58536	2.54942	0.435133	-1.34752	-1.01675	0.18243	0.337474	0.00018478	-1.3506	-1.68493	-3.07839
	pseudo22	6569834	6570068	67	Pav_sc0003835.1_g240.1.mk	general transcription factor 3C polypeptide 3-like	-1.42652	-1.2843	-3.29659	2.13638	0.0714703	1.10569	0.611298	-1.88297	-0.114888	0.501868	0.835923	2.21497	0.00106677	3.10316	1.62206	3.14882
	pseudo23	1115674	1116403	67	Pav_sc0004484.1_g060.1.mk Pav_sc0004484.1_g080.1.br	myosin-7-like probable serine/threonine-protein kinase At1g54610	-2.20466	0.362069	1.61055	-3.36479	-1.28655	-3.01378	-3.0801	-4.41777	-3.36075	-5.33793	-3.42746	-5.20454	0.000101965	-2.85244	-4.118	-4.9757
	pseudo24	3573469	3573952	67	Pav_sc0007015.1_g020.1.br	Unknown	-0.641763	2.05889	1.30279	-2.39474	-5.96733	-1.34303	-1.9864	0.714154	0.533286	-0.520471	-1.2975	-1.36207	0.00162805	-3.59905	-1.12298	-2.28466
	pseudo24	10781914	10782115	67	Pav_sc0009603.1_g010.1.br	Unknown	-1.80037	-4.172	-2.00283	0.652594	0.506857	0.337348	1.32558	-1.07329	1.26238	-1.0518	2.1455	1.92979	7.68788e-11	2.84575	3.18386	3.87993
	pseudo25	3501704	3501935	67	Pav_sc0011588.1_g010.1.br	retinitis pigmentosa 1-like 1 protein	0.404207	1.6943	2.06178	-1.79609	-0.817567	-2.71677	-0.300933	-1.64375	0.94586	-1.76267	-3.92404	-0.460885	0.000117817	-3.116	-1.51411	-3.00622
	pseudo4	6465517	6465795	67	Pav_sc0000195.1_g250.1.br	pectinesterase-like	-2.375	-3.52459	-3.7864	-1.91295	0.284098	0.412792	1.06372	0.663302	-2.59221	-1.05941	-0.299925	1.93784	0.000171955	2.99862	3.44681	3.86288
	pseudo4	8940120	8940384	67	Pav_sc0000207.1_g670.1.br	uncharacterized protein At2g29880-like	-0.825995	-0.562373	-0.503211	-0.695697	0.726664	0.921029	0.327547	0.779802	-0.833753	0.479601	3.19024	2.74234	1.3971e-05	1.09744	0.859713	3.14436
	pseudo5	4581795	4582062	67	Pav_sc0000243.1_g880.1.br	Unknown	2.93765	0.128763	1.83909	0.317428	2.02432	1.90082	-0.190971	2.63067	-2.80698	-1.55931	-1.57874	-2.32024	0.000327682	-0.446775	-0.774019	-3.81819
	pseudo5	465220	465407	67	Pav_sc0000216.1_g1150.1.br	putative nuclease HARBI1	-1.13165	-2.98234	-1.99907	-0.493678	-2.04088	1.921	2.09272	2.40764	0.583689	-1.39094	-2.90779	2.82485	0.00016571	2.50836	3.73207	3.18945
	pseudo6	9240104	9240322	67	Pav_sc0000366.1_g040.1.br	Unknown	-0.702684	-2.45321	-1.89648	1.20925	1.02665	1.43427	1.09276	-0.938634	2.61389	-0.710932	-1.00218	1.17283	0.00302526	2.72631	3.04187	1.65878
	pseudo7	1108348	1108607	67	Pav_sc0000377.1_g340.1.mk	LOW QUALITY PROTEIN: uncharacterized protein At1g04910	0.800647	0.936834	3.06635	0.710411	1.75194	0.384541	1.27549	1.3265	3.10828	-1.63174	-2.36301	-0.146378	6.0584e-05	-0.931289	0.171579	-3.08239
	pseudo8	2727657	2727926	67	Pav_sc0000482.1_g260.1.br	Unknown	-2.77903	-5.44988	-3.08347	-2.20992	1.03511	-0.177943	-1.07767	-3.76221	-0.0888813	-0.838556	-0.188107	-0.61354	0.000185987	3.45825	2.37631	2.86707
	pseudo9	9197169	9197929	67	Pav_sc0000591.1_g260.1.br	hypothetical protein PRUPE_ppa024226mg, partial	-2.33282	-4.63389	-2.78723	-3.01667	-0.909109	1.36787	1.06737	0.712601	-4.43851	0.394468	0.961904	1.11854	0	3.07683	3.30076	3.8241
	pseudo9	10006312	10006831	67	Pav_sc0000595.1_g1050.1.br	Unknown	-3.62368	-3.71823	-4.30102	-1.19601	-2.25074	0.772211	-2.28125	-4.76993	-0.229336	-2.19467	1.92159	1.21629	0.000438395	3.50188	2.39793	4.92876
	pseudo9	8671749	8672032	67	Pav_sc0000588.1_g620.1.mk	zinc finger protein NUTCRACKER-like	0.358008	1.11873	2.35095	-1.1206	1.09029	-1.79955	-1.18913	-4.9274	-2.79732	0.270636	1.63502	1.56414	1.79823e-05	-1.5725	-3.79741	-0.234924
	pseudo1	10362032	10362228	66	Pav_sc0000045.1_g350.1.mk	polyketide synthase 5	1.16955	1.19875	2.88702	-2.32379	-2.19759	-0.221738	0.494622	-1.85095	1.34407	-1.2275	-0.855584	-0.101439	0.000265691	-3.22719	-1.49911	-2.64307
	pseudo10	8813898	8814402	66	Pav_sc0000667.1_g530.1.mk	pollen-specific protein SF3-like	-1.4445	-5.85601	-5.8934	-3.47227	-1.07664	-0.495646	-1.22745	-3.41909	-5.18574	-0.424136	0.294712	0.58033	2.47957e-06	1.66527	0.448837	3.11023
	pseudo11	6220869	6221116	66	Pav_sc0000738.1_g130.1.mk	autophagy-related protein 8C-like	-4.13729	-3.38329	-3.19589	1.82854	0.495056	-0.967021	0.591419	-2.5487	0.0962904	-2.00825	-4.4329	3.44811	6.70255e-13	4.38576	3.39119	5.42008
	pseudo11	8248551	8249041	66	Pav_sc0000754.1_g750.1.mk	putative RING-H2 finger protein ATL21A	-2.07419	-3.23996	-2.3465	-1.04785	-2.31257	2.0532	0.823067	-0.309717	-1.9958	-2.06124	-1.29218	0.321492	7.29127e-09	3.16273	2.38825	1.81328
	pseudo12	385560	385879	66	Pav_sc0000787.1_g050.1.br	calphotin-like	0.680379	1.26146	2.53902	-1.70443	-1.59239	-3.03046	1.21082	0.956318	-0.220082	3.136	-1.96978	-0.376765	3.76344e-13	-3.68884	-0.940205	0.000646762
	pseudo12	9523223	9523413	66	Pav_sc0000872.1_g190.1.mk	transcription factor MYB76-like	-1.68627	-1.9875	-1.72819	1.27925	-3.09771	0.60808	2.12687	1.08009	0.155236	-1.35074	1.97822	-1.05625	0.000334578	2.23405	3.13481	2.47661
	pseudo13	8444076	8444457	66	Pav_sc0000998.1_g460.1.mk	hypothetical protein PRUPE_ppa015869mg	-2.93337	-3.08111	-2.91472	0.512653	0.743355	0.632763	1.45072	-0.512648	1.78306	-0.13577	2.3168	0.111614	5.10787e-07	3.60717	4.1711	4.1913
	pseudo13	9987679	9988008	66	Pav_sc0001015.1_g040.1.mk	SPX domain-containing protein 1-like	-2.05625	-3.74489	-3.39576	1.10873	0.801878	-0.807119	0.996565	-1.84506	-0.596614	-0.103993	-0.470608	2.03603	2.07624e-11	3.44691	2.83947	3.81055
	pseudo14	9337992	9338396	66	Pav_sc0001123.1_g090.1.mk	hypothetical protein PRUPE_ppa025749mg	-2.79219	-3.06815	-3.26311	1.6778	1.31332	-1.54063	-0.446333	-1.93603	-3.48901	-2.02499	-0.493551	-4.10494	0.000215634	4.0349	1.55993	1.46335
	pseudo15	1949987	1950227	66	Pav_sc0001181.1_g780.1.mk	Unknown	2.36059	3.05081	0.929304	-1.78238	1.58744	1.49421	-2.09286	-1.80445	-0.628505	1.52279	-0.173867	1.084	0.000139283	-1.32613	-3.71451	-1.38222
	pseudo15	1309645	1309919	66	Pav_sc0001174.1_g010.1.br	predicted protein	2.25777	1.97997	2.28696	-0.349978	-1.96414	-2.25053	0.990525	-0.580746	2.15763	0.647784	-2.83558	-1.51849	0.000446437	-3.44322	-0.935007	-2.72657
	pseudo17	1780288	1780556	66	Pav_sc0001479.1_g040.1.mk	uncharacterized protein LOC103340955	0.265033	-1.81036	-0.580274	-0.994065	0.563259	0.42978	3.53054	1.65513	3.48875	1.27679	1.29445	1.0166	0.00603922	0.625986	3.58851	1.67828
	pseudo18	5757235	5757645	66	Pav_sc0001802.1_g120.1.br	Unknown	0.926874	-0.234914	-0.350832	-1.77331	-1.43776	-2.54584	1.5587	-1.17309	-0.177837	-2.52786	-3.79845	-2.49708	0.000522245	-2.08546	0.273662	-3.06503
	pseudo2	973992	974129	66	Pav_sc0000054.1_g010.1.mk	Unknown	-3.07779	-5.27018	-2.69448	-4.15769	0.237649	1.6556	-0.891376	1.88387	1.51036	-4.18507	3.40798	1.59688	-5.71515e-12	3.87537	4.56603	5.5181
	pseudo2	6646248	6646408	66	Pav_sc0000084.1_g160.1.mk	Unknown	1.98849	0.407724	0.658005	-2.87839	-2.93617	-1.31848	-0.0971443	-2.98587	-1.33674	-0.221311	-2.49511	1.6878	4.27084e-05	-3.36381	-2.23785	-0.691102
	pseudo20	2121008	2121183	66	Pav_sc0002332.1_g010.1.mk	zinc finger homeobox protein 3-like	-2.9229	-3.88513	-0.946304	0.26674	-1.22043	1.86991	3.2108	1.88965	-3.28352	-3.98694	-1.42587	-0.961335	0.000230467	2.87948	4.18477	0.401179
	pseudo21	1954280	1954511	66	Pav_sc0002792.1_g010.1.mk	60S ribosomal protein L31	-1.72698	-3.14648	-3.99455	-1.87094	-2.63316	0.992764	-0.252178	0.947598	0.78955	-0.0774035	1.58521	-4.11406	6.84842e-05	2.3434	3.23457	3.06783
	pseudo21	2636513	2637054	66	Pav_sc0002828.1_g320.1.mk	HrpN-interacting protein from Malus	-4.10334	-3.99493	-5.20742	-0.531263	-2.00069	1.284	1.18308	-0.427696	-0.993048	-1.92681	-4.03354	2.57083	0.000206169	4.5124	4.5708	5.40412
	pseudo22	6751468	6751686	66	Pav_sc0003846.1_g150.1.br	hypothetical protein PRUPE_ppa018392mg, partial	-4.37697	-4.36484	-4.5692	-4.95235	2.67274	-2.15621	2.16693	-4.33281	3.27831	1.68592	1.16036	1.47085	4.66886e-07	5.57872	6.68118	5.88897
	pseudo23	5541772	5541969	66	Pav_sc0005245.1_g010.1.br	Unknown	1.5249	3.12581	2.58016	-0.46554	1.3503	3.07906	1.10305	0.595252	1.67822	0.422131	-1.27832	-1.79699	0.000502362	-0.58496	-1.35838	-3.10788
	pseudo25	6031069	6031429	66	Pav_co4015247.1_g010.1.mk	importin subunit alpha-like	-2.44006	-3.8864	-3.98697	-1.17357	-2.69367	2.1315	0.952037	-3.82718	-0.0776404	-1.5791	-0.000911037	-5.30041	0.000491527	3.98278	3.22876	2.10975
	pseudo3	5528837	5529093	66	Pav_sc0000119.1_g650.1.mk	dCTP pyrophosphatase 1-like	1.43416	1.16235	0.280071	-0.437549	-0.711661	-2.10857	-0.873862	-2.15596	-2.01308	-2.4373	-2.45073	-2.3024	0.000127144	-1.96096	-2.59622	-3.43197
	pseudo3	9184066	9184244	66	Pav_sc0000136.1_g200.1.br	disease resistance protein RPM1-like	-1.11903	-3.91587	-1.08258	1.90233	-0.536588	1.86903	1.48025	-2.2649	-1.4032	-1.84078	-0.188285	0.328216	2.11302e-05	3.01611	1.75704	1.27207
	pseudo4	9907184	9907466	66	Pav_sc0000212.1_g410.1.mk	galactose oxidase-like	-1.71427	-2.72988	-1.61441	-1.13158	-1.97745	-2.86042	1.98191	-3.88584	0.250558	0.570336	0.2807	1.95921	1.80526e-12	0.116811	2.73517	3.07446
	pseudo5	8078127	8078677	66	Pav_sc0000263.1_g040.1.br	hypothetical protein PRUPE_ppb019047mg, partial	-1.99037	-0.938337	-3.54856	-0.828166	2.70934	2.57937	0.504775	-1.18343	-2.70502	-1.25151	0.675838	-2.16505	7.78705e-07	3.92864	1.22835	1.38314
	pseudo5	6505763	6505970	66	Pav_sc0000257.1_g470.1.mk	Unknown	-2.76916	-2.10124	-3.83349	2.55201	2.34755	-0.707967	0.571325	-2.76771	1.57799	-0.763076	-1.10202	1.40978	0.000213567	4.68419	3.35969	3.04456
	pseudo7	3679744	3680208	66	Pav_sc0000398.1_g220.1.mk	21.7 kDa class VI heat shock protein	-2.42098	-1.38186	-3.90146	-0.0547975	-0.867336	-0.910639	-0.414292	2.12267	1.86085	0.84707	0.0761275	1.73042	3.84079e-05	1.68037	3.77703	3.27537
	pseudo9	2410627	2410906	66	Pav_sc0000555.1_g070.1.mk	indole-3-acetic acid-induced protein ARG7-like	-1.81576	-3.36241	-2.62258	-3.14278	-2.70394	1.26858	2.15199	0.510812	0.483778	-2.97526	-1.2259	-1.26395	0.000565079	2.29926	3.7407	0.836896
	pseudo1	7016633	7016851	65	Pav_sc0000031.1_g010.1.mk	N-acetylglucosaminyl-phosphatidylinositol biosynthetic protein gpi1-like isoform X3	-1.70527	-4.80291	-5.35848	-0.290961	0.208926	-1.34581	0.69801	-3.00682	-3.95195	2.44904	-0.435367	2.31694	3.65974e-06	2.68951	2.3037	4.92989
	pseudo1	10813174	10813553	65	Pav_sc0000046.1_g600.1.br	Unknown	1.22516	2.1929	0.424032	-1.20646	-0.15003	0.550245	-1.00001	-2.32154	-2.65081	-0.452451	0.0342956	-4.34481	0.00117548	-1.55984	-3.26349	-2.19344
	pseudo10	8827913	8828126	65	Pav_sc0000667.1_g580.1.br	Unknown	-1.96117	-2.27188	-3.10484	0.637514	1.71174	1.41278	-1.35493	-1.25468	-2.52235	1.44045	0.245914	0.388167	1.06893e-05	3.69126	0.762455	3.16648
	pseudo10	2037253	2037479	65	Pav_sc0000622.1_g180.1.mk	uncharacterized protein LOC103326649	-1.92548	-2.00056	-1.35874	1.7254	1.55381	-0.868132	2.70402	1.46132	-0.546121	-0.830248	0.657076	-0.209647	4.88592e-07	2.91059	3.46245	1.734
	pseudo11	6244345	6244594	65	Pav_sc0000738.1_g180.1.br	autophagy-related protein 8C-like	-1.02525	-4.08625	-3.46158	-0.321454	0.448597	-0.212918	-0.91244	-4.0542	-0.0998897	0.918754	-2.24966	1.61804	4.01919e-05	2.23992	1.25008	3.01192
	pseudo11	3667422	3667785	65	Pav_sc0000713.1_g490.1.br	Unknown	1.05372	-0.77745	-2.64533	-4.19637	-5.29793	-3.04055	-0.0248487	-1.64457	2.30134	-4.24855	-1.10287	-6.23924	2.29124e-08	-3.80638	1.14444	-2.40728
	pseudo11	6549568	6550027	65	Pav_sc0000740.1_g460.1.mk	Unknown	-3.99954	-4.33114	-5.34309	-0.795927	-3.88148	-2.91486	0.821013	-5.33512	-2.00222	-1.93216	-2.49581	2.03319	2.23956e-14	2.50438	3.89876	5.04974
	pseudo12	7136620	7137386	65	Pav_sc0000852.1_g120.1.mk Pav_sc0000852.1_g130.1.mk	isoflavone 2'-hydroxylase-like probable LRR receptor-like serine/threonine-protein kinase At3g47570	-3.08764	-4.21319	-3.35218	0.502841	-0.590961	0.0431618	-0.976602	-2.06974	-1.7457	0.360394	-1.00157	-0.348204	0.00209751	3.5293	1.9547	3.25288
	pseudo12	4011861	4012042	65	Pav_sc0000824.1_g120.1.mk	uncharacterized protein At1g04910-like	-1.86602	-2.82863	-3.28802	-0.861099	-1.21749	0.677861	-1.13135	-0.968021	0.109205	0.806829	-0.929404	1.38798	0.000239946	2.318	1.98348	3.24074
	pseudo13	5760795	5761145	65	Pav_sc0000969.1_g270.1.br	fibrous sheath CABYR-binding protein-like	-1.98243	-0.594318	1.80096	-0.701735	-2.71133	-0.127734	-3.08166	-2.65368	-2.41219	-2.59987	-1.61453	-0.554865	0.00193726	-1.38663	-3.24247	-1.90821
	pseudo13	8100532	8101051	65	Pav_sc0000996.1_g390.1.br	Unknown	1.86226	-4.74514	-3.33953	-3.84786	1.66898	1.26266	-1.605	-3.64682	-1.63998	-2.84551	-2.95357	-3.31774	4.26785e-05	0.58266	-2.37042	-3.3555
	pseudo14	6867529	6868198	65	Pav_sc0001102.1_g990.1.br	F-box protein At2g17690-like	-3.21183	-6.11055	-4.89155	-1.00349	-0.38367	-2.12095	-1.17962	-2.26317	-2.66368	-0.548901	1.4372	-2.65695	0.000227541	3.25984	2.37124	4.50737
	pseudo14	4296975	4297173	65	Pav_sc0001078.1_g070.1.br	Unknown	-1.74088	-0.584117	-3.15193	2.1968	2.59786	0.402572	2.55218	-0.228005	-4.07159	-0.224962	-3.16337	2.86962	0.000159211	3.47083	2.6516	2.93957
	pseudo14	9071570	9071791	65	Pav_sc0001114.1_g390.1.br	putative disease resistance protein At4g19050	-3.11952	-4.62856	-0.0488807	-0.407887	0.784646	1.55392	1.9983	2.29591	0.901486	-0.759892	0.00106897	1.48046	1.95258e-06	2.27001	3.26317	1.96518
	pseudo15	3228958	3229156	65	Pav_sc0001196.1_g440.1.br	B3 domain-containing protein Os02g0764100-like	0.185408	-2.64336	-0.303687	2.50255	0.0330839	2.57256	0.942041	1.68572	-0.105634	2.29115	2.55063	2.61082	0.000182617	2.58433	1.52569	3.00025
	pseudo15	9941770	9942102	65	Pav_sc0001278.1_g170.1.br	Unknown	-2.55825	0.640814	-2.11043	-2.32242	-0.171825	0.62898	-4.57189	-3.67616	-3.44038	-1.33394	-0.113727	-1.83135	3.10506e-05	0.426052	-3.20647	-0.291504
	pseudo16	10728429	10728822	65	Pav_sc0001450.1_g110.1.br	hypothetical protein	1.54336	1.22593	1.09708	1.80857	2.22307	1.59696	-3.65242	-1.35342	-1.99574	-1.5091	-0.861731	-0.233944	3.15833e-05	0.598865	-3.35683	-2.07721
	pseudo16	10542248	10542863	65	Pav_sc0001445.1_g030.1.br	hypothetical protein PRUPE_ppb020843mg	-3.13787	-2.95934	-3.84479	-1.69033	2.93796	-1.37176	-0.535826	-2.21124	-0.117697	-1.00704	-0.034628	1.76415	0.000735877	4.74483	2.55117	3.9655
	pseudo16	5504161	5504360	65	Pav_sc0001356.1_g040.1.mk	Unknown	-2.55846	-3.96056	-4.99286	-1.00336	-0.720448	-0.310434	1.8135	-2.45334	-3.35204	1.61373	-3.07189	1.64762	2.43921e-08	2.84899	3.83807	4.57201
	pseudo18	6210795	6210991	65	Pav_sc0001813.1_g060.1.mk	hypothetical protein VITISV_042967	-0.898997	-1.19134	-3.46198	-0.159583	0.681478	2.86737	1.94899	-1.58956	1.55845	-0.735047	-1.59555	0.762549	9.13584e-05	3.20153	2.74494	1.30334
	pseudo19	6825758	6826142	65	Pav_sc0002181.1_g130.1.mk	conserved hypothetical protein	-1.97193	-3.96956	-4.55307	1.85186	2.07227	-2.08079	-3.03056	-2.09882	-1.95732	-0.201691	0.6891	-0.440329	3.89232e-05	4.47782	0.763311	3.15507
	pseudo19	2387613	2387805	65	Pav_sc0001992.1_g030.1.br	Unknown	-5.63989	-6.07978	-5.57401	-4.88972	1.10617	-4.86421	-5.59981	-6.21148	-6.15415	-6.05641	0.364102	3.42015	-4.95096e-13	5.31386	-0.21336	7.74854
	pseudo19	7625442	7625659	65	Pav_sc0002206.1_g250.1.mk	palmitoyl-monogalactosyldiacylglycerol delta-7 desaturase, chloroplastic-like	-2.29992	-1.34832	-0.906078	2.10753	0.101431	2.58598	-0.55052	0.279364	-0.971613	0.832029	-5.00925	-2.29068	2.55591e-06	3.33363	1.09123	0.835592
	pseudo19	2300472	2300661	65	Pav_sc0001991.1_g030.1.mk	uncharacterized protein LOC103330949	-1.70709	-1.65094	-1.35607	1.01702	-3.0199	1.28806	2.6017	-0.20101	0.958733	2.82866	-0.118306	0.553717	0.00033574	2.1762	3.12916	3.22492
	pseudo23	3607140	3607408	65	Pav_sc0004901.1_g070.1.mk	DEAD-box ATP-dependent RNA helicase 16	-1.81981	-2.84443	-1.7912	1.97892	1.57135	2.49681	1.96181	-0.208071	2.59135	0.431741	-0.903651	-0.0909471	0.00021787	4.14178	3.92256	1.98809
	pseudo23	2892250	2892617	65	Pav_sc0004779.1_g020.1.mk	malate dehydrogenase, glyoxysomal	-1.57375	-3.12487	-1.62757	1.48514	-0.578368	2.21864	0.568325	0.891958	-0.894594	0.839498	-2.08292	1.83728	6.70244e-05	3.39136	2.32393	2.85434
	pseudo23	2889733	2889957	65	Pav_sc0004779.1_g010.1.mk	Unknown	0.708687	-1.25818	-2.95971	0.497566	-4.44423	1.05182	-4.53377	-5.31973	-5.09916	-1.89096	-0.645824	0.431881	6.71127e-08	0.695098	-4.48511	0.0499425
	pseudo23	2743256	2743691	65	Pav_sc0004761.1_g010.1.mk	RNA-binding protein 24 isoform X1	-3.6577	-4.45672	-1.53497	0.0605486	0.772934	-0.232571	-1.9586	0.732687	1.05776	-0.191259	-1.11978	-1.6845	-4.64626e-13	2.93877	3.08994	1.80963
	pseudo24	6513202	6513371	65	Pav_sc0007893.1_g010.1.br	wall-associated receptor kinase 2-like	-2.78746	-0.960011	-2.0358	-1.56125	-0.619569	1.25747	0.675509	0.101941	0.509315	0.691852	1.25816	2.38688	0.000603341	1.90481	2.181	3.35508
	pseudo25	331658	331924	65	Pav_sc0009964.1_g050.1.br Pav_sc0009964.1_g060.1.br	hypothetical protein Unknown	-1.60096	-2.36325	-3.80587	-0.475325	0.387004	0.933134	1.52033	-1.05777	2.14181	-1.902	-0.448689	-1.9807	0.000137453	2.72467	3.70424	1.07393
	pseudo25	6786285	6786472	65	Pav_co4029037.1_g010.1.br	Unknown	-1.45983	-0.68536	-0.447773	-0.775389	1.53108	2.79491	-0.745613	0.0326079	-1.70855	0.697698	2.86146	2.38948	7.02899e-13	2.59927	0.163838	3.0394
	pseudo25	996280	996441	65	Pav_sc0010298.1_g010.1.br	Unknown	-1.33656	-3.46702	-2.61195	-0.191207	1.23053	-0.991829	1.99669	0.441684	0.518123	-0.392441	0.573304	0.888882	0.000236365	2.51888	3.38307	2.6577
	pseudo25	3575857	3576169	65	Pav_sc0011663.1_g020.1.br	thiamine thiazole synthase, chloroplastic	0.762208	-0.458145	-2.3311	0.14372	-0.754792	1.13813	1.73492	-1.73229	-3.12513	-5.04699	-2.44066	-3.55095	0.00151653	0.571782	0.513583	-3.12915
	pseudo3	10094297	10094633	65	Pav_sc0000142.1_g050.1.mk	glycosyltransferase 6-like	-1.13228	-3.56462	-3.11276	-1.36689	-0.44737	-0.808099	0.299152	2.98699	-0.073598	-1.73656	-0.296718	-3.01217	0.000240881	1.36648	3.94509	0.915714
	pseudo4	8559610	8559778	65	Pav_sc0000206.1_g630.1.mk	Extra-large GTP-binding protein 3	-4.57934	-4.90051	-5.52655	-5.01437	-5.11123	-4.29531	3.13038	2.24341	3.19877	-4.63977	2.78505	-4.86253	8.50281e-06	0.19187	7.86875	6.16636
	pseudo4	2394935	2395314	65	Pav_sc0000164.1_g350.1.mk	ribokinase	-2.3816	-5.05418	-1.09135	1.81836	1.2063	-0.634581	1.02969	-3.76126	-0.785816	1.09701	-0.318488	-1.08685	0.000228981	3.22821	1.96306	2.30312
	pseudo5	8820300	8820708	65	Pav_sc0000269.1_g400.1.br	hypothetical protein PRUPE_ppa025795mg, partial	-0.901573	-1.12594	-1.65126	3.02567	2.57111	1.81856	1.43375	-0.0716807	1.03556	0.778309	0.259768	-0.0843844	0.000695456	3.74699	2.12008	1.55533
	pseudo6	5937331	5937717	65	Pav_sc0000350.1_g890.1.br Pav_sc0000350.1_g900.1.br	fibrous sheath CABYR-binding protein-like fibrous sheath CABYR-binding protein-like	-3.85881	-1.6148	-1.08292	0.024041	1.29424	2.27722	-1.2425	1.30545	-2.81282	-0.566078	1.00554	1.1792	0.000996091	3.26106	1.80749	2.51179
	pseudo6	741501	741743	65	Pav_sc0000304.1_g220.1.mk	glycosyltransferase-like KOBITO 1	-1.29868	-3.75999	-3.16665	-0.113419	-0.43965	-1.7964	0.995586	1.24461	-0.189668	1.95886	0.769627	-0.342793	0.000222767	1.7203	3.14676	3.43088
	pseudo8	3100478	3101163	65	Pav_sc0000484.1_g600.1.mk	casparian strip membrane protein 1	-3.86635	-6.51053	-5.62786	-0.966339	0.961424	-4.18637	-1.58084	1.12201	-6.64386	0.547444	-2.39342	-1.50329	0.00062585	4.65539	4.6593	4.32872
	pseudo8	7135294	7135906	65	Pav_sc0000506.1_g030.1.mk	probable leucine-rich repeat receptor-like serine/threonine-protein kinase At3g14840	-1.39475	-3.40816	-3.10537	-1.49488	-2.56155	2.31056	-0.521014	-1.79623	-3.93323	0.41599	0.173377	-2.13367	6.2076e-10	3.21498	0.830251	2.18698
	pseudo1	3261685	3262017	64	Pav_sc0000017.1_g650.1.br	cytosolic purine 5'-nucleotidase-like	0.955179	-1.88232	2.40866	-2.07634	-2.96203	-1.02132	2.06924	-0.830341	-0.32047	-3.52851	-2.8313	-2.32198	0.00290937	-3.13147	-0.435655	-4.13787
	pseudo1	7849670	7850051	64	Pav_sc0000036.1_g260.1.br	G-type lectin S-receptor-like serine/threonine-protein kinase At2g19130	2.21862	0.104933	0.0586561	-0.000116237	-0.73717	0.0700561	2.14004	1.46112	0.630126	-1.21989	-3.02366	-1.79198	0.000871562	-1.35369	0.362991	-3.00918
	pseudo10	1117641	1118051	64	Pav_sc0000616.1_g180.1.mk	F-box/kelch-repeat protein At3g23880-like	-1.23391	-2.12063	-1.8626	-0.781223	1.73763	0.866303	1.97256	-0.846696	-0.505741	2.38641	0.174632	0.808539	0.000791613	2.62554	2.4789	3.12402
	pseudo10	222430	222705	64	Pav_sc0000600.1_g380.1.mk	sucrose-phosphatase 2-like isoform X2	-2.47755	-2.30146	-5.63808	0.210225	1.02702	-0.311165	1.17361	0.687681	-2.24083	-0.893662	0.627592	1.25863	0.000249158	3.31323	3.34085	3.47517
	pseudo11	3311112	3311326	64	Pav_sc0000709.1_g020.1.mk	late embryogenesis abundant protein 2	-1.51667	-2.07376	-2.24689	0.992944	2.52993	-1.45226	-0.217616	1.18713	0.731087	1.72967	-0.288539	1.88338	0.000230231	3.34952	2.58816	3.29409
	pseudo11	22484	22752	64	Pav_sc0000689.1_g020.1.mk Pav_sc0000689.1_g030.1.mk	protein HOTHEAD receptor-like serine/threonine-protein kinase ALE2	-3.55088	-4.74811	-1.09755	-5.25745	2.00597	0.997789	0.371845	-1.20177	-4.81991	-3.74801	-4.71123	-0.942237	0.00118563	3.35606	1.58056	0.101928
	pseudo12	2759347	2759542	64	Pav_sc0000813.1_g170.1.mk Pav_sc0000813.1_g180.1.mk	hypothetical protein PRUPE_ppa018988mg probable serine/threonine-protein kinase drkD	2.71973	0.983097	0.894337	-1.71477	-1.51254	-2.38888	1.45044	1.78713	0.0381129	0.802739	-0.72278	0.806635	6.96117e-05	-3.62283	-0.531497	-1.34625
	pseudo13	10584230	10584811	64	Pav_sc0001021.1_g130.1.br	hypothetical protein PRUPE_ppb015855mg	-2.03155	-1.87577	-4.31699	1.48853	2.28433	2.0328	-0.734694	-2.1387	-0.662754	-1.52675	-1.48184	-0.352895	0.00012287	4.37493	1.36363	1.39143
	pseudo13	5238925	5239061	64	Pav_sc0000947.1_g050.1.br	monoacylglycerol lipase ABHD6	0.173688	0.0893398	-0.354812	1.78983	1.79788	1.74163	3.18819	2.40728	3.56292	1.52526	1.98707	2.449	0.000580863	1.78932	3.14125	2.04864
	pseudo13	1945949	1946262	64	Pav_sc0000893.1_g430.1.br	Unknown	-1.81688	-3.80157	-4.3391	0.595531	-0.90974	1.52647	1.65411	-0.294962	-0.798736	0.997806	1.29796	0.215313	2.68809e-06	3.60402	3.48597	3.79389
	pseudo13	8155673	8155969	64	Pav_sc0000998.1_g030.1.br	Unknown	-4.8599	-4.36526	-3.84926	-3.22988	0.418791	1.26734	1.08679	-4.0754	-0.817732	-1.81066	-2.55792	-0.21182	0.000412998	4.65969	4.1744	3.11333
	pseudo15	5806662	5806905	64	Pav_sc0001222.1_g370.1.mk	histone-lysine N-methyltransferase, H3 lysine-9 specific SUVH5-like	-5.39876	-5.89516	-5.52668	-5.51911	-0.135755	-5.55478	2.64986	-5.26432	2.69994	1.01225	1.16598	2.15668	9.27801e-05	3.93794	7.68503	7.13127
	pseudo16	5383598	5383867	64	Pav_sc0001347.1_g010.1.br	cytosolic purine 5'-nucleotidase-like	-1.74971	-1.94511	2.40264	-2.64738	0.794457	-1.76411	-1.43708	-2.24953	-3.40092	-1.67149	-3.80942	-1.99603	0.000738041	-1.41723	-3.11572	-3.20016
	pseudo16	3545774	3546191	64	Pav_sc0001328.1_g130.1.br	Unknown	1.92111	-0.0296826	-1.84102	-0.383803	-0.92988	-0.415216	-1.75558	1.04685	0.646672	-2.92741	-3.87467	-3.4245	0.000540673	-1.30568	-0.361427	-4.10733
	pseudo16	1947013	1947364	64	Pav_sc0001309.1_g690.1.mk	serine/threonine-protein kinase HT1-like	-0.987202	-2.80654	-3.21481	-0.837756	0.125331	-0.353766	0.299901	2.26502	0.758325	1.54062	1.87801	-1.7535	5.72558e-07	1.68788	3.35558	3.18798
	pseudo17	9612645	9612778	64	Pav_sc0001643.1_g010.1.mk	MATE efflux family protein ALF5-like isoform X1	-1.54233	-1.19277	-2.20435	1.98475	2.06556	-1.80577	-1.4669	-1.47221	1.04497	-0.74902	-0.0254841	1.01131	5.64827e-07	3.07873	1.48116	1.8485
	pseudo18	8965229	8965539	64	Pav_sc0001869.1_g1080.1.br	alpha-mannosidase 2x	-2.7099	-6.10221	-2.77475	0.496852	0.107406	1.71769	2.08076	-1.9661	0.773212	-0.447629	-1.37304	-1.45644	0.000109995	4.20382	4.30455	2.24259
	pseudo19	1127496	1127666	64	Pav_sc0001963.1_g070.1.br	Unknown	-1.22402	-4.71686	-2.93325	0.194557	-2.36582	0.968308	0.785859	-1.57127	1.80415	-0.385857	-3.39448	0.435163	5.7267e-06	2.46436	3.21734	1.88978
	pseudo19	2388471	2388648	64	Pav_sc0001992.1_g030.1.br	Unknown	-2.82336	-2.24953	-2.88715	-1.85839	1.69771	2.29484	0.701727	-0.0502701	1.86031	-0.401665	-3.54302	2.6443	-4.95096e-13	4.11372	3.67639	3.8655
	pseudo19	6779309	6779589	64	Pav_sc0002181.1_g060.1.mk	tyrosine decarboxylase 1	-3.66348	-3.22861	-3.49223	0.3478	0.804311	-0.295159	1.93369	-3.38563	-0.301015	0.802734	-2.48856	1.07245	9.80835e-05	3.80411	4.10643	3.87449
	pseudo2	10100862	10101400	64	Pav_sc0000095.1_g1260.1.br	F-box/kelch-repeat protein At3g23880-like	-5.55557	-3.05692	-4.90456	-1.70085	-0.61227	0.492093	-1.89384	0.68076	-1.98954	-1.50199	-1.73434	-0.287104	0.000205288	3.75994	3.60282	3.07503
	pseudo20	4740783	4741064	64	Pav_sc0002433.1_g250.1.br	cytosolic purine 5'-nucleotidase-like	-1.6213	-3.77975	-2.06692	0.28382	1.66071	2.44777	0.409024	-2.81199	-0.535379	0.774845	-0.274944	-1.34265	6.93003e-05	3.94963	1.76286	2.2035
	pseudo20	10590278	10590464	64	Pav_sc0002652.1_g130.1.br	Unknown	-2.29882	-1.04162	0.265356	2.22548	1.10761	0.426826	3.49184	-1.21784	3.26831	-1.81274	-2.28747	1.89452	0.000444315	2.11226	3.49469	1.15385
	pseudo21	5532438	5532928	64	Pav_sc0002961.1_g010.1.br	hypothetical protein PRUPE_ppa016448mg, partial	-1.03702	-3.3249	-3.13535	0.913195	-0.189115	1.99417	0.76445	-4.11093	0.885085	-1.74753	-0.883705	-1.61369	0.0013162	3.2663	2.36204	0.734896
	pseudo22	2218058	2218233	64	Pav_sc0003492.1_g270.1.mk	hypothetical protein PRUPE_ppa014990mg	-2.84745	-2.91688	-4.48545	2.98948	1.24716	1.74534	1.05215	2.5834	2.65285	3.28516	0.724456	2.11301	8.27534e-08	5.43478	5.50562	5.63715
	pseudo22	5547118	5547304	64	Pav_sc0003756.1_g060.1.mk	lysine histidine transporter-like 8	-2.63589	2.4866	-2.33982	1.13448	-1.58859	0.0480911	0.933574	-0.444681	1.52826	-4.18472	-1.21832	-2.12634	1.45322e-13	-0.74343	-0.108984	-3.06242
	pseudo23	10398228	10398553	64	Pav_sc0006118.1_g060.1.br	probable LRR receptor-like serine/threonine-protein kinase At4g08850	1.3756	0.690051	1.10947	0.496068	-1.55744	0.0174766	-1.31123	-3.20363	-3.43774	-2.46778	-3.02897	-1.5786	0.000122036	-1.20446	-3.39816	-3.3185
	pseudo23	9947590	9947889	64	Pav_sc0006064.1_g050.1.mk Pav_sc0006064.1_g060.1.mk	protein FAR1-RELATED SEQUENCE 2 Unknown	-1.72767	-2.77933	-1.60631	1.82135	0.858337	0.0916947	1.63131	-0.339962	-0.450586	0.557007	2.01889	-0.0587591	0.00044094	3.04673	2.57362	3.06269
	pseudo23	236731	237252	64	Pav_sc0004383.1_g120.1.br	putative ribonuclease H protein At1g65750	-0.591119	-4.7436	1.05931	1.20636	-3.44138	0.851524	-4.46621	-4.77219	-3.73846	-3.02557	-3.76144	1.20987	2.2791e-06	0.594044	-4.1511	-0.150205
	pseudo24	6817662	6817963	64	Pav_sc0008034.1_g010.1.mk	F-box/kelch-repeat protein At3g23880-like	-2.03427	-2.49726	-1.83412	1.70504	-0.193123	1.18658	1.6033	1.63936	1.71497	1.99625	0.835966	0.855589	0.000870891	3.19166	3.74932	3.43405
	pseudo25	3651371	3652083	64	Pav_sc0011726.1_g010.1.br	Cytochrome P450 81D1	1.67771	0.19439	-0.0814571	-0.510801	-2.56767	0.149522	0.338712	-1.2229	-4.786	-1.7467	-2.55372	-3.14122	0.00387307	-1.41758	-1.61268	-3.18466
	pseudo25	2255678	2255890	64	Pav_sc0010852.1_g050.1.br	Unknown	2.27348	2.80423	2.2774	-2.39174	-0.338575	-0.294651	1.4454	0.151154	1.81642	-0.485908	2.65037	-0.990298	0.000447102	-3.21368	-1.18009	-1.15293
	pseudo3	4364904	4365131	64	Pav_sc0000112.1_g040.1.br	hypothetical protein PRUPE_ppb016826mg	-0.972677	-2.96753	-2.94198	-1.84268	-2.05597	-2.17978	-1.83916	-5.10623	2.89574	2.07677	1.50214	-4.14073	0.000296147	-0.0527059	3.33603	3.21112
	pseudo3	3398498	3398821	64	Pav_sc0000108.1_g040.1.mk	Unknown	1.899	0.30692	-2.70756	-0.74439	-2.41752	-0.224803	-0.301159	-0.409641	-2.72456	-1.74829	-4.10525	-2.15567	0.00445755	-1.64253	-1.57725	-3.14147
	pseudo3	6176878	6177125	64	Pav_sc0000123.1_g840.1.br	putative disease resistance protein RGA4	0.150612	-3.22596	-4.32215	1.81395	1.33036	-1.52734	-2.02862	-4.33253	-0.31664	2.27258	2.21312	-0.355016	9.46374e-08	2.3317	-0.206883	3.0163
	pseudo4	10628991	10629417	64	Pav_sc0000212.1_g1850.1.mk	cyclic nucleotide-gated ion channel 1-like	-3.23661	-3.06468	-2.95203	0.108894	1.16535	0.790033	-1.39786	-2.22567	-1.95224	0.276381	-1.0788	-0.0994184	3.24254e-13	3.83116	1.2632	2.88323
	pseudo4	4199570	4199760	64	Pav_sc0000175.1_g210.1.br	Unknown	-0.789082	-2.70393	-0.58057	-2.26498	-0.529322	2.80589	-1.36712	0.858285	-2.25105	2.19212	0.862248	2.46437	2.46602e-08	2.49438	0.783064	3.08734
	pseudo5	357517	357699	64	Pav_sc0000216.1_g910.1.br	non-ltr retroelement reverse transcriptase	-1.68331	-1.24486	-1.12075	-1.45108	2.56221	1.87575	0.189034	2.29636	2.27776	-2.77276	1.00047	2.66383	0.000445995	3.0587	3.19164	2.82997
	pseudo5	10461690	10461969	64	Pav_sc0000291.1_g070.1.br	serine/threonine-protein phosphatase 7 long form homolog	-3.39237	-3.44794	-2.22581	0.855621	2.50753	-2.08086	0.807063	-0.838613	-1.38396	-0.0421985	-0.109624	0.735915	0.00137245	4.2705	2.74827	3.15287
	pseudo5	867576	868119	64	Pav_sc0000219.1_g200.1.mk	uncharacterized protein LOC103323894	-2.88805	-2.21565	-3.11666	1.27694	1.65598	1.7182	-2.99285	0.60242	1.34241	0.986223	1.28753	2.04848	0.000469831	4.25074	3.16601	4.20004
	pseudo5	3034011	3034201	64	Pav_sc0000231.1_g480.1.br	uncharacterized protein LOC103948804	2.59159	-0.0168674	0.993778	-1.05571	-2.79684	2.57258	1.34634	3.24395	-0.42015	-3.08405	-1.87534	-0.537115	1.64767e-05	-0.454408	0.502877	-3.06057
	pseudo6	2456442	2456918	64	Pav_sc0000322.1_g150.1.mk	abscisic acid 8'-hydroxylase 3-like	-2.38937	-1.6145	-2.40865	-0.220037	2.07873	-0.45856	-2.24866	-2.74949	-2.56748	0.140397	-0.37004	-0.483575	0.000131866	3.04141	-0.419162	1.87632
	pseudo6	2754984	2755308	64	Pav_sc0000323.1_g420.1.br	pentatricopeptide repeat-containing protein At1g62910-like	-1.4883	-4.02418	-1.92614	-0.579273	-2.05112	-0.923111	1.37349	1.0712	1.03531	0.776953	-1.10163	-1.23318	7.05372e-05	1.07825	3.30733	1.93543
	pseudo7	797711	798171	64	Pav_sc0000376.1_g600.1.br Pav_sc0000376.1_g610.1.br	Unknown Unknown	-0.0149965	-3.70927	-2.08967	0.529069	-1.65646	1.11758	2.59051	0.355134	-2.40934	1.08873	2.30211	2.06692	0.00360256	1.59487	2.52538	3.11199
	pseudo9	2206455	2206662	64	Pav_sc0000554.1_g2010.1.mk	conserved hypothetical protein	-0.805622	0.245349	-1.21808	2.62015	2.88619	2.49835	2.64482	2.01112	3.11503	1.57918	-0.147829	2.57584	5.94775e-05	3.13322	3.11487	2.17135
	pseudo9	1766301	1766448	64	Pav_sc0000554.1_g1070.1.br	LOW QUALITY PROTEIN: heat shock cognate 70 kDa protein	-0.400267	-0.413291	-0.942981	-0.930562	3.12512	3.05626	3.39316	3.52677	2.97608	2.16602	2.49473	2.44015	3.15128e-05	3.11423	3.88147	2.93832
	pseudo1	7357943	7358186	63	Pav_sc0000034.1_g060.1.br	Unknown	-1.78017	-3.17659	-3.87674	-1.43191	-2.27358	0.321241	-1.80157	0.616961	-0.955629	-2.19786	1.29821	2.28062	0.000435882	1.95918	2.31393	4.00362
	pseudo10	8067999	8068228	63	Pav_sc0000661.1_g400.1.mk	hypothetical protein PRUPE_ppa021105mg, partial	-1.8225	-2.00384	-6.18457	-0.488631	-3.13238	0.574413	0.387008	-0.28668	-3.64026	-0.688964	1.0212	1.03426	0.000110265	2.08504	2.01604	3.10555
	pseudo11	5563772	5564371	63	Pav_sc0000731.1_g210.1.br	Unknown	-2.42977	-2.89	-4.53148	-1.18441	1.24789	-0.340221	-0.877461	-0.41821	-2.53732	-2.61463	-1.74005	-3.10168	0.000689988	3.30897	2.00986	0.670979
	pseudo11	8235388	8235649	63	Pav_sc0000754.1_g750.1.mk	putative RING-H2 finger protein ATL21A	-1.82236	-4.25361	-3.34696	-0.409298	0.992286	0.240114	0.825548	-0.831061	-1.37606	-2.28693	0.833044	2.91345	7.29127e-09	3.17813	2.64942	4.45707
	pseudo12	9782525	9782863	63	Pav_sc0000875.1_g270.1.br	Unknown	0.547708	-0.104449	-1.69268	-1.99219	-0.903766	0.528297	-6.64386	-3.1909	-3.00524	-2.53526	0.102123	-1.35597	5.74873e-05	-0.277843	-3.46837	-0.722997
	pseudo12	8197154	8197316	63	Pav_sc0000862.1_g180.1.mk	putative nuclease HARBI1	-0.540054	-2.02497	-1.95863	1.54297	2.96328	-1.37079	0.801396	-0.92091	-0.710026	-1.83512	-1.27971	1.04474	0.000455812	3.22059	1.27536	1.21028
	pseudo12	5217754	5218089	63	Pav_sc0000832.1_g280.1.mk	transcription activator GLK1	-4.67116	-3.61754	-4.71148	-2.63478	-2.82998	-1.96106	-1.28249	0.859297	-0.930212	-2.07305	-3.55195	-0.855798	0.000821304	1.81348	4.11333	2.46203
	pseudo13	4998883	4999213	63	Pav_sc0000934.1_g140.1.mk	hypothetical protein PRUPE_ppa019278mg, partial	-4.58035	-4.53284	-2.57006	-0.628849	0.34042	-5.06711	0.842008	-1.28425	-2.81245	-3.93998	-5.75299	2.42661	0.00017088	2.93855	3.21041	4.42943
	pseudo13	1587547	1587810	63	Pav_sc0000890.1_g1440.1.mk	Unknown	-4.08376	-3.90137	-3.57945	-2.12285	-1.25349	-1.00961	-2.45154	0.425771	1.25331	-0.481124	-2.18657	3.27459	0.000151268	2.45088	4.2218	5.66244
	pseudo13	8506876	8507205	63	Pav_sc0000998.1_g540.1.mk	uncharacterized protein LOC103324227	-1.16086	-4.04645	-2.3357	-2.92239	-2.16813	0.720813	0.128013	1.46214	1.07589	1.51284	1.17303	0.169048	0.000217464	1.50435	3.07687	3.14243
	pseudo13	10398582	10398862	63	Pav_sc0001020.1_g150.1.mk	uncharacterized protein LOC103339532 isoform X1	1.72822	-0.614967	-3.25427	0.446655	-2.84009	2.58041	0.62699	-1.21148	-4.68383	-4.15664	-3.30457	-4.974	2.94737e-05	0.878372	-1.01453	-4.42815
	pseudo15	7745779	7745991	63	Pav_sc0001251.1_g240.1.mk	Unknown	-3.28467	-2.19325	-1.27138	-0.181822	0.143478	1.09519	0.574553	1.673	0.301963	-0.486671	-2.68929	-2.03876	7.27221e-06	2.48667	3.00648	0.596392
	pseudo16	8853677	8853887	63	Pav_sc0001412.1_g120.1.br	Unknown	-1.75743	-2.85166	-3.5509	-0.521847	-1.34477	0.244222	1.23941	0.81721	-2.98046	1.1608	-0.324865	-0.744773	0.00265855	2.13007	3.0318	2.80477
	pseudo17	5546562	5546802	63	Pav_sc0001540.1_g410.1.br	Unknown	-3.38576	-4.20081	-1.57872	0.575957	-1.37137	-1.56003	-0.168795	-2.46019	-0.614602	1.57519	-2.80059	1.58646	0.00107106	2.19262	1.83056	3.65949
	pseudo17	4892674	4892990	63	Pav_sc0001529.1_g320.1.mk Pav_sc0001529.1_g330.1.mk	pentatricopeptide repeat-containing protein At3g24000, mitochondrial-like probable galacturonosyltransferase 4	-3.50258	-2.18632	-1.18427	0.575	1.79177	1.31513	1.11596	-0.397791	0.0101171	-0.332949	-0.768239	-1.80455	0.000326507	3.31428	2.39471	1.15644
	pseudo19	10994998	10995213	63	Pav_sc0002286.1_g160.1.mk	disco-interacting protein 2 homolog B-A-like	-1.23193	-0.878389	1.90168	-0.189345	1.13138	-2.10503	0.933775	-2.33888	-0.0834261	-1.5391	-2.97818	-3.91126	0.00030525	-0.512039	-0.624928	-3.13031
	pseudo19	7108639	7108961	63	Pav_sc0002193.1_g090.1.br	predicted protein	-4.13684	-3.23278	-1.20066	1.14068	-2.01266	0.231523	2.56397	-3.05278	-1.92754	-0.92818	0.976293	1.59848	8.72797e-05	2.59975	3.39567	3.20605
	pseudo19	8203800	8204089	63	Pav_sc0002208.1_g010.1.br	putative ribonuclease H protein At1g65750	-1.21307	-2.69014	-5.81005	-1.0901	1.33913	1.52241	-2.29937	0.384996	-0.0593999	-0.227207	-3.47258	-0.753516	0.00024522	3.28104	2.03082	1.3477
	pseudo2	8151382	8151639	63	Pav_sc0000091.1_g620.1.br	Unknown	-0.263695	-3.15784	-2.7593	-5.09526	-3.26205	-2.17589	-3.09143	2.32976	2.68945	0.686233	-1.52486	-0.0961709	9.82444e-11	-1.62283	3.40757	1.40423
	pseudo2	9518706	9518946	63	Pav_sc0000095.1_g260.1.br Pav_sc0000095.1_g270.1.br	vinorine synthase-like, partial G-type lectin S-receptor-like serine/threonine-protein kinase At4g27290, partial	-0.759667	-2.14799	-2.96315	0.973429	-0.946403	-1.44007	1.93571	0.557054	0.102658	1.07121	-0.737229	2.59984	0.000814627	1.59384	2.75383	3.21386
	pseudo20	81434	81596	63	Pav_sc0002287.1_g160.1.mk	phosphatidylinositol/phosphatidylcholine transfer protein SFH11	-2.50702	-2.65598	-1.98758	-0.773568	0.33209	1.74416	-0.600641	0.78078	2.81155	0.615058	-2.67258	-1.6433	1.15344e-06	3.14599	4.00154	1.77538
	pseudo21	3877215	3877589	63	Pav_sc0002858.1_g320.1.mk	hypothetical protein VITISV_041423	-2.47559	-0.812013	-3.54688	0.249422	-0.198963	1.0786	1.00082	0.00477394	-3.03329	-0.339154	2.13033	2.03971	0.000486257	2.32095	1.90485	3.47443
	pseudo21	4421983	4422470	63	Pav_sc0002869.1_g140.1.br	Tag=/pseudo	-1.64099	-2.36238	-2.17832	1.30776	-1.61014	-0.703381	1.98728	1.54836	-3.04627	-0.0366008	1.69301	1.57473	0.00208267	2.21499	3.25172	3.28755
	pseudo21	3418513	3418796	63	Pav_sc0002842.1_g010.1.mk	uncharacterized protein LOC103336415	1.57418	-0.605566	0.465183	-3.4984	-0.839284	-2.92482	-1.74878	-2.46298	-3.7434	1.05506	-1.12869	1.79565	0.000259861	-2.68649	-3.17947	0.260253
	pseudo22	7064079	7064244	63	Pav_sc0003877.1_g010.1.mk	F-box protein At2g26160-like	-2.83011	-1.38395	-2.99205	-4.13151	-4.10667	-1.76026	2.22205	-2.81715	1.30111	1.81377	3.12413	-3.92125	0.000258881	-0.662623	3.48492	4.24328
	pseudo22	10800134	10800330	63	Pav_sc0004354.1_g160.1.mk	phosphatidylinositol 4-phosphate 5-kinase 7-like	-1.53974	-0.427789	-2.67487	1.84273	2.92368	-1.42003	2.47976	1.78454	-0.478851	3.03852	2.95359	0.304491	1.20213e-05	3.2147	2.9691	3.78927
	pseudo23	3200054	3200454	63	Pav_sc0004847.1_g010.1.br	Unknown	-2.86158	-4.09629	-3.8922	-0.0474399	-3.04525	-1.76051	1.45878	0.233199	-0.89966	-2.5101	-2.22674	0.0733481	0.000200498	2.39344	4.08178	2.45208
	pseudo23	7503997	7504305	63	Pav_sc0005634.1_g080.1.br Pav_sc0005634.1_g090.1.br	Unknown Unknown	-0.306483	-2.57654	-1.83322	-1.55958	0.584763	-0.360967	2.49265	0.721996	1.1985	0.828889	3.18986	1.10082	0.002971	1.05843	2.92905	3.37571
	pseudo24	6919610	6919842	63	Pav_sc0008057.1_g010.1.br	Unknown	-0.288806	-2.63016	-1.98292	1.03255	2.14949	2.29325	2.31377	-0.550263	0.235037	-0.14046	-2.51469	-1.89329	0.000219188	3.20665	2.46996	0.132194
	pseudo24	5437328	5437524	63	Pav_sc0007519.1_g060.1.br	retinitis pigmentosa 1-like 1 protein	-0.988659	-2.7629	-1.45126	0.759909	0.159593	0.635347	2.64094	1.58664	0.257239	-0.12044	0.0976822	-1.00047	0.000733815	2.10126	3.35922	1.29174
	pseudo25	1335364	1335579	63	Pav_sc0010426.1_g010.1.br	Unknown	-0.424472	2.91045	1.55712	0.326773	-1.43303	2.48185	-0.537345	-2.50031	-2.80956	-1.56618	-1.98707	0.576522	0.000313875	-0.6361	-3.47414	-2.42882
	pseudo25	6125941	6126128	63	Pav_co4017001.1_g010.1.br	probable inactive 2-oxoglutarate-dependent dioxygenase AOP2	-0.255836	0.0565911	-0.975511	2.54605	2.92223	2.66391	2.00535	0.364236	1.61828	2.9275	0.508167	0.997693	0	3.04973	1.81097	2.20833
	pseudo3	2765034	2765248	63	Pav_sc0000105.1_g180.1.br	Unknown	0.387079	1.15234	2.95603	-2.56336	-1.27459	-2.66963	-1.5865	-0.150407	1.62029	-1.54421	-2.63471	-1.95113	0.000630006	-3.93202	-1.38988	-3.88818
	pseudo3	3766168	3766412	63	Pav_sc0000108.1_g710.1.br	Unknown	0.572602	-3.07709	-3.6873	1.07918	-3.85491	3.62416	2.69481	1.75514	1.70533	-3.37472	2.88824	3.36679	0.00040157	3.10791	2.96143	3.40378
	pseudo3	3090187	3090609	63	Pav_sc0000107.1_g070.1.br	uncharacterized protein LOC105960505	-2.57137	-1.63097	-3.3853	0.643198	1.47953	1.1242	-0.462671	-1.98724	-3.19991	-1.47966	-2.97706	-1.31579	0.000961793	3.47614	0.888953	0.596481
	pseudo4	6876563	6877079	63	Pav_sc0000195.1_g1080.1.mk	general transcription factor IIH subunit 3	-2.12041	-2.57773	-3.75593	-2.01721	-0.595896	-2.95509	-1.12098	0.348506	-0.384026	0.300162	1.5952	0.297451	0.00040484	1.13793	2.40619	3.53926
	pseudo4	9221257	9221447	63	Pav_sc0000207.1_g1170.1.mk Pav_sc0000207.1_g1180.1.br	hypothetical protein PRUPE_ppa017979mg glycine-rich cell wall structural protein 2-like	-0.159601	-1.50241	-3.57593	1.33863	2.41472	1.5166	1.4012	-0.436125	-2.50548	2.0438	0.655205	1.78498	4.01126e-06	3.00887	1.41674	2.77918
	pseudo4	97520	97836	63	Pav_sc0000146.1_g160.1.br	Unknown	-2.21234	-2.89799	-4.68632	-2.27643	-1.63803	2.30888	1.51496	-1.37949	-2.24361	-4.41536	-0.646339	0.86047	0.000936794	3.81785	3.15099	2.6857
	pseudo5	2195361	2195580	63	Pav_sc0000221.1_g070.1.br Pav_sc0000221.1_g080.1.mk	Unknown HMG-Y-related protein B-like	-0.499336	-2.67696	-1.77594	1.29937	1.61486	1.63795	-0.0340387	-0.613776	0.0324794	2.60536	2.16857	0.155314	0.000113997	2.9015	1.19869	3.3389
	pseudo6	6945751	6946047	63	Pav_sc0000354.1_g580.1.mk Pav_sc0000354.1_g590.1.mk	bHLH transcription factor uncharacterized protein LOC103321770	-0.562285	1.91544	-2.15868	-0.492821	-1.57713	0.991308	0.657097	-3.36261	2.11821	-2.65771	-3.48846	-1.96617	0.000177522	-0.623383	0.364231	-3.21443
	pseudo6	5987973	5988268	63	Pav_sc0000350.1_g1010.1.mk	exocyst complex component SEC5A-like	-3.09841	-4.28946	-2.16364	-2.04573	-1.01638	-0.804054	-1.23329	-2.46687	-2.21197	2.7718	-1.36279	-1.16838	4.0825e-08	1.74322	1.07177	4.2924
	pseudo6	2677555	2677848	63	Pav_sc0000323.1_g280.1.mk	hypothetical protein RCOM_1440800	-0.998626	-4.09006	-3.16882	0.162526	1.09415	1.62636	0.910944	1.72932	0.402232	-0.0983616	0.725661	-0.481692	0.000128417	3.24174	3.28125	2.30109
	pseudo7	5787028	5787311	63	Pav_sc0000412.1_g240.1.mk	monosaccharide-sensing protein 2	-2.2474	-2.18503	-2.84424	-1.97618	0.890506	2.03782	-2.18909	-4.57393	-1.79536	-3.93728	-0.341221	-0.0352542	3.10696e-05	3.44714	-0.0525673	1.68381
	pseudo8	6482625	6482845	63	Pav_sc0000502.1_g580.1.br	anthocyanidin 5,3-O-glucosyltransferase-like	-4.47321	0.26707	-4.6661	1.30317	2.76998	-4.57604	-4.52814	3.42386	2.39609	1.52291	1.88919	2.99609	0.000261978	2.8571	3.63865	3.49869
	pseudo8	2077593	2077737	63	Pav_sc0000480.1_g780.1.br	Unknown	-0.711035	-1.14842	0.8058	3.31447	3.06807	2.73255	1.97518	1.14127	1.66473	1.7596	1.99449	2.89337	6.91189e-07	3.15214	1.72785	2.39697
	pseudo9	7343345	7343634	63	Pav_sc0000584.1_g190.1.br	tyrosine-sulfated glycopeptide receptor 1-like	-1.63311	-2.96712	-3.78149	-0.71113	-1.49032	-0.739851	-0.740709	-4.58896	-2.74746	2.50449	0.631799	-0.00174052	0.000161991	1.58182	0.593061	3.97476
	pseudo1	4934823	4935037	62	Pav_sc0000026.1_g510.1.br	spindle and kinetochore-associated protein 1 homolog	-2.00618	-2.00006	-2.6249	0.789276	1.07383	1.61431	1.99697	0.484733	-1.95155	0.732222	-1.13301	0.661361	0.000921693	3.38272	3.09531	2.48423
	pseudo11	4048422	4048640	62	Pav_sc0000716.1_g010.1.mk	small subunit processome component 20 homolog	-3.07675	-3.09633	-3.92296	-2.82869	1.6989	1.35559	-3.26519	-0.430983	2.90126	2.10066	-3.51087	-1.63278	2.72869e-07	4.30235	4.78634	3.96278
	pseudo12	1193482	1194016	62	Pav_sc0000793.1_g060.1.mk	cation/H(+) antiporter 15-like	-1.7985	-2.50403	-3.29911	-4.45083	-0.46609	0.953944	-1.15049	-4.54998	-1.95484	-0.724858	0.839245	1.38786	0.000151886	2.25938	0.409879	3.1479
	pseudo13	6074122	6074501	62	Pav_sc0000976.1_g170.1.br	Unknown	-1.3834	-3.10446	-0.798326	-0.211887	-0.67459	1.16929	2.43871	3.47074	1.02609	2.49962	-0.222369	0.713151	0.000267863	1.79882	4.10913	2.92334
	pseudo13	4024406	4024745	62	Pav_sc0000910.1_g470.1.mk	SWI/SNF complex subunit SWI3B-like	-2.0901	-3.25453	-2.65226	-4.14847	-1.55993	-0.758943	0.53663	0.958953	-0.858528	-3.91919	-1.5504	2.78403	0.000724607	0.984073	2.98409	3.87066
	pseudo14	10495646	10496052	62	Pav_sc0001132.1_g520.1.br	hypothetical protein PRUPE_ppa019809mg	-1.44628	-2.60881	-4.30112	-0.599624	-0.0292843	-0.322767	-0.0939021	0.895913	-1.19733	3.15192	-0.319457	-0.867429	0.000721365	2.06834	2.47509	4.13768
	pseudo14	5828157	5828312	62	Pav_sc0001089.1_g030.1.mk	Unknown	-2.05287	-4.36588	0.60972	1.01397	1.03647	1.47186	-0.632363	-1.09864	-0.288395	1.84938	-5.3833	3.67317	4.53602e-07	1.9146	0.0889246	3.17387
	pseudo15	1786126	1786440	62	Pav_sc0001181.1_g430.1.mk	putative ribonuclease H protein At1g65750	-1.55632	-1.92182	-2.20184	0.377924	1.87686	0.449306	1.26438	-1.17063	-0.145226	1.40931	1.45209	2.37375	0.00393391	2.94796	2.19118	3.68661
	pseudo16	9271799	9272069	62	Pav_sc0001416.1_g140.1.mk	TPA: histone H3.2	-2.61858	-5.31859	-3.19427	-0.672751	0.349751	-0.812925	-1.5408	0.853735	-1.74288	-1.60571	-3.36361	-0.557565	0.00021621	3.05582	3.04337	1.89507
	pseudo17	9075034	9075336	62	Pav_sc0001626.1_g010.1.br	hypothetical protein PRUPE_ppb019047mg, partial	-1.59377	-4.68695	-0.361865	-4.61813	-0.842333	-0.583835	-2.0726	-0.620295	-0.447092	0.768166	2.55284	1.22931	0.000166246	0.140395	0.498104	3.11021
	pseudo17	8733049	8733340	62	Pav_sc0001623.1_g060.1.br	Unknown	-2.80298	-3.68432	-0.526711	1.32699	1.20022	3.01236	1.55572	1.29712	1.65085	1.60426	-0.0452532	1.91606	0.00201993	3.81436	3.22161	3.08823
	pseudo17	10977247	10977455	62	Pav_sc0001697.1_g080.1.br	Unknown	-1.77595	-1.16231	-2.87906	-0.054816	-0.275257	1.99928	0.927684	1.99379	1.42778	0.404347	0.711781	2.23673	0.000589312	2.72591	3.2933	3.13319
	pseudo18	9225885	9226030	62	Pav_sc0001877.1_g230.1.mk	biotin carboxyl carrier protein of acetyl-CoA carboxylase, chloroplastic isoform X1	1.94455	-0.0854367	2.37768	1.12241	0.488007	-0.543237	0.154682	0.15344	-2.32319	-0.929567	-2.27114	-1.03044	0.000682903	-1.22746	-2.04218	-3.03135
	pseudo18	6599261	6599522	62	Pav_sc0001825.1_g120.1.br	Tag=/pseudo	-1.79024	-4.71938	-1.65567	0.963741	0.884363	1.03389	1.12225	-3.19046	-1.04273	-1.39718	0.191697	0.92784	0	3.18073	2.10463	2.40957
	pseudo18	5342504	5342888	62	Pav_sc0001801.1_g070.1.br	uncharacterized protein LOC103328753	-1.6014	-4.54158	-1.53049	-2.97131	-1.60842	-3.87633	2.66883	1.83942	-0.133731	-1.39016	-6.50105	-0.219685	7.50503e-06	-0.456938	3.91616	0.800077
	pseudo2	10634549	10634722	62	Pav_sc0000096.1_g460.1.mk	hypothetical protein PRUPE_ppa017986mg, partial	-6.11442	-4.04445	-3.21846	0.715036	-3.72499	-5.36509	-3.12792	-1.63497	2.26632	1.17443	0.46664	1.98233	-2.45238e-12	3.25451	4.84583	5.3784
	pseudo21	5691378	5691607	62	Pav_sc0002963.1_g090.1.br	putative pentatricopeptide repeat-containing protein At1g12700, mitochondrial	-1.88581	-3.56872	-2.20169	-0.117498	-0.0117927	1.67847	1.67054	-2.25058	-3.90499	-2.4373	-2.03939	1.64925	3.42401e-06	3.15988	2.59615	2.63902
	pseudo21	10888747	10888954	62	Pav_sc0003253.1_g020.1.br	putative ribonuclease H protein At1g65750	-0.47415	0.241397	1.48161	-0.86082	-3.63367	0.298634	-0.30702	-2.77462	1.06286	-1.73483	-3.23324	-4.24959	1.08009e-06	-1.33479	-0.625274	-3.35333
	pseudo22	84230	84486	62	Pav_sc0003261.1_g240.1.mk	B3 domain-containing protein LOC_Os12g40080-like isoform X2	-0.655522	-1.17745	-2.25844	1.61528	0.770139	0.408497	2.27766	1.93346	0.969788	1.50909	0.702733	2.12288	9.78301e-05	2.24511	3.04682	2.77947
	pseudo22	2783297	2783621	62	Pav_sc0003550.1_g060.1.br Pav_sc0003550.1_g070.1.br	hypothetical protein PRUPE_ppb019121mg Unknown	0.27667	0.39761	1.39824	-2.64681	-3.72499	-1.57799	-2.61528	-3.13435	-2.32724	-1.47119	-0.316257	-2.51121	0.00010018	-3.17898	-3.43854	-1.94721
	pseudo23	10619999	10620138	62	Pav_sc0006153.1_g010.1.br	Unknown	-3.16376	3.47191	2.19012	-4.88481	-3.93918	0.767524	3.07518	3.46513	3.28977	-4.08257	-3.75619	-4.88274	-3.7783e-13	-3.13006	0.891252	-6.56187
	pseudo23	10909561	10909941	62	Pav_sc0006207.1_g020.1.mk	Unknown	-1.21713	-3.21927	-3.44838	2.00812	-0.127271	-0.759463	-0.410278	-1.93763	-1.24535	-0.608002	-3.54811	-2.405	0.000211613	3.13557	1.18997	0.564517
	pseudo23	7356879	7357319	62	Pav_sc0005598.1_g060.1.br	UDP-glycosyltransferase 85A5-like	-5.45047	-2.3886	-2.75177	-1.63696	1.26358	2.12943	-0.819515	-1.74858	-1.57527	-0.159466	-0.0836378	0.776908	0.000528999	4.29212	1.72753	3.29355
	pseudo24	6541528	6541717	62	Pav_sc0007908.1_g020.1.br	LOW QUALITY PROTEIN: DEAD-box ATP-dependent RNA helicase 2-like	-1.61132	-0.968254	-0.501993	0.678723	2.62745	2.28669	2.88015	0.60752	-0.182116	0.0730564	-1.13235	2.02323	0.000357416	3.03495	2.66077	1.85127
	pseudo24	6146236	6146389	62	Pav_sc0007779.1_g010.1.br	Unknown	-3.48995	-5.36036	-2.18698	-4.44997	-4.29251	1.89695	1.95518	1.70279	-2.48398	-3.5034	1.63033	1.44119	3.2435e-05	3.52054	4.45679	4.14716
	pseudo24	7360273	7360817	62	Pav_sc0008205.1_g010.1.br	TMV resistance protein N-like, partial	-0.879853	-3.7085	-4.76233	0.85241	-0.287246	1.49292	-1.04622	0.0428074	-0.726466	-2.57351	-4.20829	-3.48468	2.609e-11	3.05004	1.68976	-1.07649
	pseudo3	960744	960998	62	Pav_sc0000101.1_g210.1.br	Unknown	-1.77798	-3.70235	-2.1439	-3.26937	0.331723	1.97205	1.81784	0.640912	0.779291	-0.225071	0.639476	0.843384	0.00196416	3.15184	3.51559	2.8228
	pseudo5	3235446	3235637	62	Pav_sc0000231.1_g1090.1.br	Unknown	0.676811	2.60183	3.47423	0.734537	-1.71297	0.857288	1.96974	2.61808	2.01779	-1.18573	-0.524689	-0.561896	9.55266e-05	-2.31274	-0.413088	-3.37364
	pseudo5	3870831	3871016	62	Pav_sc0000240.1_g320.1.br	Unknown	-1.1255	-4.63337	-1.97852	-1.77338	2.80561	-2.21315	1.61695	-3.70577	3.08152	2.12336	3.30651	-4.66703	0.00050116	3.31729	3.94762	4.2474
	pseudo5	1294491	1294726	62	Pav_sc0000220.1_g830.1.mk	ribulose-1,5 bisphosphate carboxylase/oxygenase large subunit N-methyltransferase, chloroplastic	-2.89454	-2.79588	-3.93257	-2.05207	0.0969302	-1.85807	1.89347	-1.48402	0.15499	-3.78742	0.633515	-0.30768	0.000209572	2.20548	3.91433	2.82162
	pseudo7	9574428	9574737	62	Pav_sc0000464.1_g380.1.br	Unknown	0.549882	-0.693816	0.485234	-4.34857	-6.50275	-3.34134	0.110789	-2.64965	-0.421428	-1.56862	-3.62366	-0.381167	0.000114113	-4.45485	-0.810149	-1.55372
	pseudo7	9040319	9040477	62	Pav_sc0000451.1_g200.1.mk	TMV resistance protein N-like isoform X2	-1.10912	-1.34023	-1.02988	2.72444	1.30741	1.63528	2.53084	-0.767779	2.34563	2.6484	1.02449	2.30587	4.74163e-05	3.17656	3.08605	3.29664
	pseudo8	2107410	2107579	62	Pav_sc0000480.1_g830.1.br	hypothetical protein PRUPE_ppb024739mg, partial	3.56334	2.19981	2.89497	1.12662	1.03408	1.13943	2.50042	-0.694955	1.69089	-0.178479	-0.12484	-0.993731	0.000844669	-1.89039	-1.3275	-3.3727
	pseudo9	10689664	10689977	62	Pav_sc0000598.1_g610.1.mk	4-coumarate--CoA ligase-like 7	-2.42079	-2.66578	-2.55603	0.242246	0.487806	0.991997	-0.606532	-2.97254	0.757906	-2.36135	-2.16409	1.4142	0.00153816	3.15256	2.26663	2.58334
	pseudo9	10450935	10451134	62	Pav_sc0000598.1_g140.1.mk	calcium-binding protein PBP1-like	-1.09831	-2.89809	-1.81528	-1.94217	-3.75714	0.765597	-0.437523	0.510029	2.74277	-1.71861	-1.67548	-1.43558	0.000218271	1.20016	3.32232	0.1562
	pseudo9	10672802	10673030	62	Pav_sc0000598.1_g560.1.mk	external alternative NAD(P)H-ubiquinone oxidoreductase B3, mitochondrial	-0.894701	-2.44693	-2.18802	1.33399	1.11237	1.48283	2.01121	0.789064	-0.632068	2.6473	0.992858	2.65162	9.08413e-05	2.99082	2.76724	3.95001
	pseudo9	1783179	1783461	62	Pav_sc0000554.1_g1080.1.mk	LOW QUALITY PROTEIN: heat shock cognate 70 kDa protein	-3.20252	-5.16542	-3.18209	-0.447623	-3.4723	-1.50825	-0.516721	-6.19056	-5.07554	-1.55693	-1.43825	0.752769	2.2817e-05	2.25186	1.58942	3.27871
	pseudo1	7072477	7072653	61	Pav_sc0000031.1_g130.1.mk	DNA topoisomerase 3-alpha	2.32846	1.02487	2.83988	-1.27007	-0.174493	-1.41019	0.289561	1.25498	0.580632	1.86777	-0.382499	0.139417	2.13672e-05	-3.08369	-1.47781	-1.36535
	pseudo1	2999664	2999930	61	Pav_sc0000017.1_g360.1.br	Unknown	-2.20887	-3.07426	-3.62677	0.427834	0.364004	-0.776505	0.403403	2.15543	0.819692	1.37148	0.204435	-1.90686	0.000159319	2.95065	4.18047	3.26765
	pseudo10	906403	906768	61	Pav_sc0000615.1_g090.1.mk	G-type lectin S-receptor-like serine/threonine-protein kinase At1g11330	-3.97305	-2.50743	-5.13886	1.32708	1.39579	-1.9651	-1.09044	-1.87687	-6.64386	1.06244	-1.49806	-3.76951	5.43063e-05	4.33207	1.48867	3.2311
	pseudo10	8994957	8995324	61	Pav_sc0000669.1_g060.1.br	Unknown	-4.24921	-5.04866	-5.26148	-5.7711	-4.6059	-1.69683	-0.479234	-0.123609	1.74446	1.63195	-5.3843	2.28735	9.01411e-05	1.7565	5.51721	6.20022
	pseudo10	8092997	8093185	61	Pav_sc0000661.1_g460.1.mk	probable tRNA (guanine(26)-N(2))-dimethyltransferase 2	-1.15292	-2.3981	-2.87544	-0.920869	0.97619	2.0026	-0.074316	-0.0468372	-0.658012	0.634001	-0.677571	0.234247	0.000809536	3.06746	1.71783	2.11204
	pseudo10	3004522	3004740	61	Pav_sc0000624.1_g1120.1.br	Tag=/pseudo	-0.774135	-2.97348	-0.195758	1.48936	2.32136	-0.82153	2.98221	2.05912	1.50375	-0.504837	2.74131	-1.3689	0.000713866	2.40085	3.23309	2.29489
	pseudo10	8735628	8735967	61	Pav_sc0000667.1_g340.1.mk	transcription initiation factor IIE subunit beta-like	-2.12697	-3.65893	-4.40763	-1.59488	1.07236	-0.00154666	1.13633	-0.00797898	-0.0751472	-1.83163	-1.82871	0.177376	1.89977e-11	3.27261	3.54351	2.25303
	pseudo10	798549	798897	61	Pav_sc0000608.1_g290.1.br	zinc finger BED domain-containing protein RICESLEEPER 2-like, partial	-2.89682	-5.64937	-2.48567	-0.117282	-3.99398	-2.63754	0.78148	-4.4773	-1.11189	-2.50505	-2.31583	1.27447	0.000253312	1.7834	2.74233	3.07098
	pseudo11	9293837	9294039	61	Pav_sc0000759.1_g550.1.mk	ankyrin repeat-containing protein At5g02620-like	1.13484	-1.52036	2.08952	-0.122997	-0.598155	0.75451	-0.809871	1.30427	-0.522176	-1.46829	-3.91957	-3.12581	0.000438786	-1.05817	-0.864035	-3.64915
	pseudo11	8336222	8336342	61	Pav_sc0000755.1_g090.1.mk	Unknown	-0.330922	-3.18141	1.99691	-5.00011	-1.98353	-2.36614	-4.97923	2.9241	-3.26961	1.74139	-2.09306	-4.19419	0.000439759	-3.35648	0.657802	-0.43081
	pseudo11	762718	763139	61	Pav_sc0000691.1_g630.1.mk	probable protein phosphatase 2C 10	-3.10492	-2.70001	-3.83895	0.386117	-0.88652	0.847059	0.681069	-3.58183	-0.749887	0.294281	-4.8269	-1.75364	0.000952133	3.42293	2.74635	2.19612
	pseudo12	722018	722264	61	Pav_sc0000789.1_g020.1.br	hypothetical protein PRUPE_ppa024614mg	-2.44985	0.241634	-1.22031	2.30645	2.77113	3.20544	0.742938	-2.74354	-2.03556	-2.76228	-2.82097	-0.634099	0.000172439	3.54851	0.203784	-0.943288
	pseudo12	534117	535007	61	Pav_sc0000788.1_g020.1.mk	laccase-15-like	-1.36563	-4.93901	-5.69656	-0.535671	1.05923	-0.146449	1.68415	-3.19905	-0.205062	1.14105	-1.09301	-2.37769	1.50635e-06	3.06318	3.25152	2.70395
	pseudo12	10085489	10085927	61	Pav_sc0000877.1_g720.1.br	uncharacterized protein LOC103338664, partial	-2.71434	-2.16871	-4.39665	0.344967	-0.450884	-0.662506	1.1789	-0.147552	-0.486333	-1.81926	0.614392	-0.48128	1.99799e-06	2.64079	3.20011	2.5833
	pseudo13	4532881	4533037	61	Pav_sc0000912.1_g040.1.mk	hypothetical protein B456_002G136200	-0.295086	-2.05664	-1.76387	2.48706	1.08832	1.80475	-1.14245	0.920861	-1.73714	2.62423	-3.50924	3.11777	0.000253695	3.05601	0.971118	3.4677
	pseudo13	4883125	4883331	61	Pav_sc0000933.1_g030.1.br	Unknown	2.14602	1.36005	2.55013	-0.385156	-1.72236	-1.05646	0.0252171	-0.324875	-0.163502	-0.193418	-1.04748	-1.6462	0.000446949	-3.05183	-2.246	-2.93709
	pseudo14	2109221	2109642	61	Pav_sc0001046.1_g430.1.mk	caffeic acid 3-O-methyltransferase-like	-4.11438	-4.1467	-3.41379	-1.84106	0.289591	-2.34009	0.492173	-1.56926	-0.672232	-2.28982	0.288495	-1.45173	5.22905e-10	3.02978	3.51072	3.1063
	pseudo14	4532949	4533370	61	Pav_sc0001080.1_g280.1.mk	histone-lysine N-methyltransferase, H3 lysine-9 specific SUVH4 isoform X1	-2.9296	-5.79143	-6.50853	-2.11127	-1.88776	-1.12233	-2.94922	-1.31376	0.957568	-4.00952	-1.59125	-0.501215	8.72135e-05	2.58389	3.94797	2.77939
	pseudo14	4149816	4150281	61	Pav_sc0001077.1_g340.1.mk	Unknown	-2.33294	-2.66109	-3.58383	-1.84269	-2.54359	1.71123	0.958028	1.08269	0.0667946	-0.250948	-1.16748	-1.52919	0.000444612	3.08163	3.53726	1.89115
	pseudo14	9720001	9720124	61	Pav_sc0001124.1_g440.1.br	Tag=/pseudo	2.54202	2.76181	2.99489	-1.75889	-0.283646	0.231348	2.13755	2.52038	0.262888	1.25641	2.259	0.119287	0.000293955	-3.16712	-0.860033	-1.31659
	pseudo14	7049345	7049501	61	Pav_sc0001103.1_g040.1.mk Pav_sc0001103.1_g050.1.mk	transcription factor GAMYB-like Unknown	-0.791569	-3.04578	-1.79586	0.504207	-1.90826	-1.25098	1.46291	0.109561	0.830078	-0.427261	1.06134	2.36381	0.000158616	1.09292	2.50801	3.01515
	pseudo14	8684979	8685178	61	Pav_sc0001111.1_g400.1.br	uncharacterized protein LOC101249853 isoform X2	0.535308	-1.47985	-1.41383	0.352143	0.759111	1.56253	2.99689	2.69082	2.27561	2.9756	0.551184	2.65855	0.000372452	1.43986	3.14278	2.84127
	pseudo15	8374123	8374254	61	Pav_sc0001258.1_g630.1.br	calphotin-like	-1.43213	3.113	1.93716	-1.5014	-0.599098	0.366496	0.145852	-0.718427	-1.38204	-3.87558	-2.50336	-0.47956	0.000382118	-2.48064	-2.61501	-3.74026
	pseudo15	5563992	5564425	61	Pav_sc0001218.1_g110.1.br	hypothetical protein PRUPE_ppa022598mg, partial	-1.06431	-1.61132	-4.05624	-1.1939	1.31377	2.06943	1.71942	-0.493141	-1.23201	-2.57753	2.51204	2.33362	0.000660907	3.04013	2.35527	3.65612
	pseudo15	5598372	5598543	61	Pav_sc0001218.1_g170.1.mk	probable auxin efflux carrier component 1b	-3.28401	-2.52378	-1.85117	1.4642	2.74031	0.97393	2.28218	1.04255	-1.02982	-1.26175	1.44885	-3.16503	6.53412e-05	4.36443	3.74298	2.55696
	pseudo15	7810024	7810216	61	Pav_sc0001251.1_g380.1.br	uncharacterized protein LOC103322830	-1.92923	-1.82647	-3.13815	0.809251	-1.0281	1.15101	-1.61398	0.928274	-1.14172	2.83669	1.01944	-0.434726	0.00267969	2.76173	2.0274	3.91259
	pseudo16	7519015	7519424	61	Pav_sc0001405.1_g890.1.mk	cleavage and polyadenylation specificity factor subunit 5	0.507594	1.66782	0.815245	-4.42779	-1.28131	-4.95594	-1.64723	-0.946503	-2.07777	-3.76657	-1.7272	-5.74876	0.00017033	-3.69755	-2.56435	-4.01204
	pseudo16	1153258	1153461	61	Pav_sc0001305.1_g550.1.mk	protein LOL2-like	0.350199	-2.5392	-2.48913	1.63849	1.61203	0.212561	0.937581	-2.30672	-0.275913	2.25205	0.791835	2.78701	8.02398e-07	2.17327	0.857124	3.04348
	pseudo17	5844040	5844541	61	Pav_sc0001543.1_g340.1.br	Unknown	-4.47712	-4.66368	-4.19296	0.532675	-3.20603	0.15517	-1.52514	-4.93553	-0.464572	-0.867125	0.254182	-0.604098	0.00147195	4.26257	2.99033	4.10883
	pseudo17	5470784	5471044	61	Pav_sc0001540.1_g220.1.mk	uncharacterized protein LOC103322145	-1.64804	-5.63297	-3.14051	2.49977	-2.97644	0.71993	1.21976	-1.01367	-2.18513	1.06328	-3.86963	1.88718	0.000198498	4.037	2.7497	3.69382
	pseudo18	9892928	9893390	61	Pav_sc0001885.1_g100.1.mk	Unknown	-3.77016	-4.21513	-2.66659	-1.46909	-3.11976	-1.07697	0.123446	0.00219283	-0.260753	-2.83956	-0.998668	-0.861726	0.0003968	1.73924	3.36151	2.06434
	pseudo19	8956236	8956558	61	Pav_sc0002231.1_g150.1.br	Unknown	1.25979	-2.44575	1.17211	-1.30688	-2.55471	0.590203	1.72523	-0.887933	-0.848338	-1.57804	-3.13592	-3.52743	1.03565e-09	-1.21601	-0.134283	-3.17374
	pseudo2	10224990	10225197	61	Pav_sc0000095.1_g1520.1.mk	cytochrome P450 CYP72A219-like	-3.75388	-3.31267	-1.57377	0.851562	2.07857	-3.19635	1.92894	-3.45804	2.93793	-3.44876	-2.75436	1.01868	7.21373e-06	3.58709	4.50076	2.14951
	pseudo2	4278474	4278661	61	Pav_sc0000069.1_g110.1.br	Unknown	2.91486	1.82146	-0.448932	-0.757807	-0.832975	-4.50415	1.75203	-1.96667	1.36783	2.09524	0.571523	1.07142	0.000300237	-3.30254	-0.928331	-0.587122
	pseudo2	2584686	2585000	61	Pav_sc0000062.1_g310.1.mk	uncharacterized protein LOC103320274	-2.05029	-2.56864	-5.69656	-1.9062	0.498478	-3.17368	-2.38908	-3.23183	-1.51886	-1.22714	-3.88602	2.8332	3.4471e-09	2.06024	0.590304	4.15005
	pseudo20	177179	177375	61	Pav_sc0002291.1_g060.1.mk	probable pectinesterase/pectinesterase inhibitor 46	-2.24774	-3.26631	-2.43929	0.858695	1.5103	1.65936	0.430237	0.611754	-0.866352	0.821677	0.88657	-1.47157	0.000417523	3.97062	2.77902	2.99491
	pseudo20	9043643	9044002	61	Pav_sc0002598.1_g050.1.mk	uncharacterized protein LOC103331128	-2.57533	-1.0566	-1.75494	0.629423	0.496373	1.2395	1.15344	0.748541	2.52273	1.48976	2.16215	-0.0626367	0.00328943	2.49297	3.35258	3.12482
	pseudo21	10425530	10425711	61	Pav_sc0003202.1_g150.1.br	hypothetical protein PRUPE_ppb024553mg	-1.25779	-2.50603	-2.13644	0.657303	-0.466866	1.14327	2.04596	0.209186	0.906303	0.262893	0.406689	-2.08392	1.42125e-08	2.45634	3.12329	1.74878
	pseudo21	5695706	5696088	61	Pav_sc0002963.1_g090.1.br	putative pentatricopeptide repeat-containing protein At1g12700, mitochondrial	-2.82189	-2.93953	-4.24929	-2.69826	0.589767	0.176285	0.403402	-2.70257	-2.01429	-0.0208749	0.818878	-0.637674	3.42401e-06	3.10412	2.40991	3.38665
	pseudo22	8357494	8357804	61	Pav_sc0004023.1_g180.1.br	Unknown	-0.657233	-1.19229	-2.11315	-0.538688	0.19741	-0.995708	1.78667	0.0745918	-0.436949	2.21956	1.9063	1.66335	0.000522923	0.842701	2.00844	3.15109
	pseudo22	3842589	3842857	61	Pav_sc0003614.1_g240.1.br	retrotransposon polyprotein	-1.23221	-2.77535	-2.26559	1.62801	1.25625	1.43684	-2.18679	0.375512	0.428753	-0.727053	-2.60393	-2.10406	0.00178454	3.39234	1.87656	0.3608
	pseudo23	5691708	5691857	61	Pav_sc0005275.1_g010.1.br	hypothetical protein	-0.28686	-0.704009	-1.01254	1.88418	-0.267353	3.12296	2.99033	-0.265364	3.40248	1.73922	1.89583	0.769516	8.02428e-05	2.77816	3.32645	2.18367
	pseudo23	6568417	6568846	61	Pav_sc0005462.1_g040.1.br	hypothetical protein PRUPE_ppa011197mg	-4.4159	-3.54627	-3.26118	-0.00937944	-0.27625	1.75593	-0.422228	-0.472226	-2.02996	-1.26338	-1.82785	-1.59429	0.000134058	4.45618	2.85426	2.12044
	pseudo23	10389488	10389669	61	Pav_sc0006118.1_g030.1.br	probable leucine-rich repeat receptor-like protein kinase At1g35710	2.68867	0.765538	1.25086	-0.455625	-0.0933864	-1.93621	-1.15449	-2.51925	-1.40619	-1.36462	-0.959077	-0.0790917	0.000323871	-2.44906	-3.39464	-2.50899
	pseudo24	6692342	6692631	61	Pav_sc0007965.1_g010.1.br	Unknown	-4.96393	-6.21765	-1.96494	-6.1733	2.86318	-5.53044	-4.56565	-4.63041	2.14389	1.66883	-2.07866	-0.0377799	8.79771e-05	4.59935	3.89976	3.86352
	pseudo3	4366378	4366724	61	Pav_sc0000112.1_g050.1.mk	Homogentisate phytyltransferase 2	-2.134	-1.73395	-4.97075	0.998693	-3.14295	-1.55762	0.423272	1.29311	-0.34693	-1.64775	-1.15225	1.41907	0.00250391	2.12905	3.03026	2.61936
	pseudo4	1596068	1596300	61	Pav_sc0000157.1_g820.1.br	Unknown	-1.45038	-2.37628	-0.971092	2.40422	1.12368	0.544931	1.44702	-0.0801309	2.14762	-0.688718	-0.823124	0.237955	2.49909e-05	3.06311	2.92273	1.14601
	pseudo4	4024849	4025046	61	Pav_sc0000174.1_g1910.1.mk	uncharacterized protein LOC103323102	-2.46506	-4.79694	-2.0865	0.24538	-2.32348	-1.02591	-0.406695	-1.15317	-4.29035	-1.14584	0.0718339	2.34666	9.45763e-05	2.05178	1.47169	3.86405
	pseudo5	3423046	3423388	61	Pav_sc0000233.1_g050.1.mk	putative disease resistance protein RGA1 isoform X1	-2.00384	-3.18109	0.656024	1.04104	3.25578	2.54259	0.681509	-0.992087	2.04532	-0.0265251	-1.38339	-0.995901	3.95767e-05	3.17141	1.68763	-0.0522236
	pseudo6	7922293	7922420	61	Pav_sc0000358.1_g930.1.mk	LOW QUALITY PROTEIN: UDP-glycosyltransferase 89B1-like	-2.7756	-3.4154	0.635973	-0.0509051	1.33228	1.13787	4.04589	1.05695	0.450761	1.83684	-1.92193	1.41075	0.000677524	1.6639	3.47638	1.85633
	pseudo6	9241016	9241208	61	Pav_sc0000366.1_g040.1.br	Unknown	-0.429355	-1.20886	-1.19523	2.10194	0.911672	2.44181	2.77869	-0.338176	2.62745	0.797937	2.52026	0.613215	0.00302526	2.84818	3.10122	2.48196
	pseudo6	5081058	5081440	61	Pav_sc0000348.1_g500.1.mk	salicylic acid-binding protein 2-like	-1.23538	-2.53786	0.326864	0.84094	0.133447	0.376243	3.26328	2.10975	-0.10607	1.58574	0.406066	-1.6363	7.02382e-05	1.17713	3.00361	1.32825
	pseudo7	1247869	1248138	61	Pav_sc0000379.1_g030.1.br	thebaine 6-O-demethylase-like	1.5769	1.96866	2.24985	-2.89462	0.292706	1.11284	-2.75656	-1.61867	-3.14525	-4.38189	1.79994	-3.97689	0.000106601	-1.72627	-4.31216	-1.6973
	pseudo9	9427669	9427836	61	Pav_sc0000592.1_g250.1.br	ankyrin-1-like	2.63007	1.44374	3.44098	0.211414	-1.04334	-0.369248	-0.943705	0.536871	1.50252	1.08709	-0.525996	0.597899	4.77438e-05	-3.03197	-2.04105	-2.19014
	pseudo1	96335	96444	60	Pav_sc0000002.1_g060.1.mk	bifunctional 3-dehydroquinate dehydratase/shikimate dehydrogenase, chloroplastic-like isoform X1	0.514159	-3.79522	-2.69932	2.23026	-2.66385	3.4679	1.97211	-0.925793	-0.342455	1.49743	-2.74274	-2.29597	3.4922e-06	3.26619	1.66306	0.941303
	pseudo1	5144004	5144295	60	Pav_sc0000027.1_g180.1.br	hypothetical protein CISIN_1g045719mg	-1.19792	-2.13354	-3.00914	1.77511	0.663049	1.4468	2.24156	0.513384	2.61964	-0.971961	1.30889	0.153393	0.00289382	3.29457	3.96458	2.37916
	pseudo10	7214753	7214940	60	Pav_sc0000658.1_g020.1.br	uncharacterized protein LOC103948804	1.12905	0.631488	2.05707	-1.79829	-2.15562	-1.16508	0.27846	0.966195	0.548947	0.292369	-1.30244	1.57815	0.000174532	-3.0435	-0.77055	-0.774805
	pseudo10	1124795	1124992	60	Pav_sc0000616.1_g200.1.mk	vacuolar protein sorting-associated protein 22 homolog 1	-1.03397	-5.05504	-5.95594	1.54231	2.54961	-1.83712	2.14398	-3.74337	-3.66788	0.273752	-1.5741	0.209965	-4.68675e-11	4.08107	3.09677	2.33733
	pseudo11	9265659	9265936	60	Pav_sc0000759.1_g500.1.mk	ankyrin repeat-containing protein At3g12360-like	2.18691	-0.826898	0.853022	0.863245	-1.46326	0.542295	-1.3892	-2.49719	-2.57457	-2.34582	-1.9721	-0.550993	0.00295936	-0.928284	-3.2519	-2.60986
	pseudo11	8269670	8270122	60	Pav_sc0000754.1_g790.1.br	putative ribonuclease H protein At1g65750	-2.85224	-4.71616	-3.22879	-0.374944	-0.795519	0.692632	0.0546594	1.02082	1.16642	-0.232723	-1.08295	0.373629	0.000456424	3.38744	4.22945	3.20899
	pseudo12	9117175	9117397	60	Pav_sc0000866.1_g350.1.mk	cleavage stimulation factor subunit 2	-2.52749	-5.76056	-4.16736	0.469397	-0.814698	2.21166	1.16755	-1.29657	-2.98464	-0.901374	0.96634	-1.85158	0.000440217	4.73348	3.48921	3.48225
	pseudo12	8586844	8587040	60	Pav_sc0000863.1_g430.1.br	Unknown	-3.86947	-3.35902	-3.7795	-3.24963	-0.136133	2.46386	-3.04947	1.5239	-3.46373	1.59124	1.71596	-3.91737	2.39844e-05	4.77424	3.69297	4.73675
	pseudo13	2333000	2333557	60	Pav_sc0000893.1_g1080.1.br Pav_sc0000893.1_g1090.1.mk	hypothetical protein CICLE_v10017905mg, partial hypothetical protein PRUPE_ppa026515mg	-2.20112	-3.17734	-6.64386	-0.693065	-1.35724	-0.529147	0.139338	0.660022	-2.97772	-0.385555	-0.443556	-2.36351	5.86167e-06	2.33195	3.05464	2.32625
	pseudo13	6189471	6189589	60	Pav_sc0000977.1_g080.1.br	hypothetical protein PRUPE_ppa016298mg	0.0358286	0.0713059	-1.50632	-1.40951	0.890575	0.856574	-0.593081	0.672862	3.45298	0.713447	3.84518	3.34771	6.41116e-11	0.735082	2.44369	3.43139
	pseudo13	7467962	7468168	60	Pav_sc0000983.1_g530.1.mk	LOW QUALITY PROTEIN: uncharacterized protein LOC103334197	-2.79881	-1.41041	-3.60603	0.250607	-0.903146	-2.49153	-1.8656	0.681094	-5.75232	-0.438387	1.9114	-0.683277	5.58011e-06	1.65978	1.65528	3.08891
	pseudo14	4282282	4282435	60	Pav_sc0001078.1_g040.1.mk	rab proteins geranylgeranyltransferase component A 1-like	-2.14288	-1.08163	-1.7919	2.30661	-1.0206	1.53388	2.89098	-1.04893	-2.14268	1.86851	1.20455	1.37537	0.000516318	3.07714	3.04065	3.11385
	pseudo14	1208632	1208846	60	Pav_sc0001037.1_g020.1.br	uncharacterized protein LOC103441644	-0.861942	-3.02571	-3.44062	1.18494	-0.74217	2.22544	2.31717	1.76865	-2.56104	-0.00218547	1.02978	0.534953	0.000244974	3.30235	3.48394	2.5527
	pseudo15	4303587	4303896	60	Pav_sc0001196.1_g2230.1.mk	endoglucanase 25	-2.7095	-3.44955	-1.98837	-1.44475	0.34093	0.616664	2.18446	0.809132	0.139892	-1.9995	-0.380095	-0.40615	9.83259e-07	2.67354	3.89775	1.83659
	pseudo15	9008199	9008384	60	Pav_sc0001269.1_g080.1.br	hypothetical protein PRUPE_ppa020685mg, partial	-1.49311	-1.94427	-0.0207359	1.88361	1.38316	2.75647	-0.310529	-1.9615	-0.773335	1.04195	0.981758	0.864319	0.00108505	3.0278	0.0420531	1.8707
	pseudo16	8757271	8757557	60	Pav_sc0001411.1_g790.1.br	Unknown	-5.06296	-2.84957	-2.58042	-0.500552	-0.0781907	-3.23126	-1.96918	-0.30976	-2.00704	2.14542	-3.15144	0.203544	3.73504e-06	2.39017	1.96475	4.08212
	pseudo16	10162527	10162819	60	Pav_sc0001430.1_g050.1.br	Unknown	-0.772344	-5.46767	-3.50532	1.56515	2.17094	-4.55982	-4.21671	-4.05419	0.889222	1.58483	-5.19653	2.57757	0.000133552	3.43036	1.49796	3.69192
	pseudo17	8542238	8542419	60	Pav_sc0001615.1_g020.1.mk	sn1-specific diacylglycerol lipase beta	-1.31726	-1.12737	-2.78443	1.13568	-1.08245	2.8209	0.669304	-0.242203	0.272938	0.139443	0.808648	1.94909	0.000219935	3.27722	1.8595	2.74122
	pseudo17	2680013	2680157	60	Pav_sc0001502.1_g070.1.mk	uncharacterized protein LOC103342923	2.08262	2.34708	1.73742	-1.69709	-1.96678	-3.20809	-0.285833	-2.57631	2.67545	-4.46476	-0.987707	-2.29909	0.000438497	-4.23451	-0.779081	-4.07173
	pseudo18	5998049	5998264	60	Pav_sc0001808.1_g170.1.br	auxilin-related protein 1-like	-1.82818	-3.042	0.399806	2.36997	2.19136	2.39684	0.994221	1.23903	1.45002	-0.350415	-0.2021	1.4397	0.00126844	3.1228	2.04028	1.34202
	pseudo18	1808154	1808543	60	Pav_sc0001718.1_g240.1.mk	peroxidase A2-like	-1.23756	-0.986269	-2.96727	2.22362	1.41584	1.74736	1.4336	-0.0941971	-0.353286	-1.4585	0.491181	2.88462	9.30568e-05	3.33941	2.06469	3.11488
	pseudo18	4132269	4132464	60	Pav_sc0001779.1_g060.1.mk	protein TRANSPARENT TESTA 12-like	-0.861032	-2.90649	-5.01533	1.08099	1.50467	-0.540598	2.14398	-0.207658	0.182975	-1.6484	-0.660592	2.21256	2.0733e-09	2.98013	3.16708	2.96626
	pseudo19	2240097	2240293	60	Pav_sc0001990.1_g130.1.mk	glutathione S-transferase U17-like	-3.49872	-1.96345	-0.516467	-0.636998	0.361495	2.83408	0.487299	1.91304	1.40385	0.561639	0.0117346	-0.221181	2.20886e-05	3.11723	2.90397	1.67863
	pseudo19	5468901	5469073	60	Pav_sc0002115.1_g090.1.mk	probable CCR4-associated factor 1 homolog 11	-0.957251	-2.2245	-1.85011	-0.454366	-0.475828	1.23157	0.0469944	1.50226	1.37862	0.624083	2.3815	1.98769	0.000126888	1.91573	2.68373	3.41279
	pseudo2	4864810	4865061	60	Pav_sc0000071.1_g440.1.mk	putative F-box/LRR-repeat protein At5g02930	-2.83558	-0.721897	-6.64386	-6.64386	-3.43608	-0.286905	0.343402	-5.91874	2.59518	-6.35553	-6.64386	-1.42214	-2.71761e-10	0.285718	3.2762	-0.935922
	pseudo20	7196860	7197034	60	Pav_sc0002501.1_g080.1.br	Protein TOPLESS	3.50067	-1.12188	1.74187	-0.712563	-1.24346	1.35741	-0.975099	-0.92136	-4.5025	0.473172	-1.76924	2.26159	7.99811e-07	-2.07275	-3.80654	-1.22342
	pseudo21	8347558	8348037	60	Pav_sc0003104.1_g110.1.br	hypothetical protein PRUPE_ppa1027157mg, partial	-2.90126	-3.35587	-1.94513	-0.851127	1.19339	0.807022	0.4029	0.301937	-2.18805	0.868035	-0.568307	0.417468	9.8722e-07	3.22431	2.49773	2.96484
	pseudo21	1947524	1947740	60	Pav_sc0002790.1_g110.1.br	Unknown	2.63541	0.582483	2.52749	0.0771873	1.06346	2.28045	-0.861024	-1.77895	-1.06538	0.981808	-0.0391453	-1.28905	0.00111417	-0.751809	-3.35206	-2.00505
	pseudo21	2750025	2750609	60	Pav_sc0002828.1_g490.1.mk	uncharacterized protein LOC103325420 isoform X1	-2.22882	-4.24668	-2.99775	-1.62683	-1.21015	1.34948	-0.50736	-3.72865	-0.65185	-0.855959	-2.54001	-1.1143	0.00234519	3.07831	1.85521	1.60053
	pseudo22	8116684	8116999	60	Pav_sc0004001.1_g040.1.br	TMV resistance protein N-like	-3.63489	-2.66897	-3.13762	-1.74916	1.53408	1.2804	0.714471	-4.26372	-1.55294	-0.642472	0.209298	-2.0477	7.59605e-05	4.00019	2.5331	2.53654
	pseudo23	2806735	2807034	60	Pav_sc0004766.1_g040.1.mk	hypothetical protein PRUPE_ppa012557mg	-1.94035	-3.51893	-3.24328	1.99003	-2.84307	-2.37444	2.05464	-1.17609	0.72599	0.718993	1.77915	-0.502353	4.43586e-07	3.24707	3.78525	3.67329
	pseudo23	6388585	6388768	60	Pav_sc0005427.1_g020.1.br	LOW QUALITY PROTEIN: probable pre-mRNA-splicing factor ATP-dependent RNA helicase	-0.587788	-5.92167	-1.57421	-2.53985	0.117617	2.37939	-0.587889	-3.7384	1.29395	-2.14151	1.98707	2.06373	7.22247e-05	2.66625	1.64927	3.04021
	pseudo23	7912318	7912537	60	Pav_sc0005679.1_g010.1.mk	somatic embryogenesis receptor kinase 2	2.48703	1.36973	1.71419	-1.29137	-0.575258	-2.60637	1.44605	1.6737	-0.916654	0.686062	-1.27154	-0.500215	0.000631307	-3.20507	-0.831888	-2.07104
	pseudo25	1984436	1984743	60	Pav_sc0010708.1_g010.1.br	acyl-coenzyme A thioesterase 13-like	-0.940434	-2.00752	-1.68464	1.48033	0.783478	2.28155	-0.292993	0.252256	0.548769	-2.22426	-1.75146	0.152619	0.00130908	3.1164	1.68281	0.586125
	pseudo25	7281604	7281794	60	Pav_co4038947.1_g010.1.br	Unknown	0.552663	2.08778	-3.99095	-2.47035	0.565773	-1.35165	-4.14177	-4.09228	-1.60877	-1.67344	-4.25108	-3.45882	9.48602e-05	-1.49386	-3.70534	-3.66106
	pseudo25	1182887	1183210	60	Pav_sc0010361.1_g010.1.br	Unknown	-3.37923	-2.21626	-4.7177	-2.57671	1.73115	1.44948	-2.8194	-2.7282	-1.47096	-2.8439	-3.54492	-1.98815	1.73599e-05	4.15402	0.903295	0.449561
	pseudo3	4687367	4688191	60	Pav_sc0000113.1_g200.1.br	54S ribosomal protein L19, mitochondrial	-3.21577	-3.48715	-2.93479	-2.09867	0.895512	0.220604	1.10273	1.2683	-1.21998	-0.493247	-1.4346	-0.290359	0.000823377	3.31443	3.9278	2.53455
	pseudo3	6655523	6655936	60	Pav_sc0000127.1_g150.1.mk Pav_sc0000127.1_g160.1.mk	Unknown LOW QUALITY PROTEIN: 4-coumarate--CoA ligase-like 6	-1.40059	-3.66893	-2.62204	1.35923	1.20505	-1.07071	-2.33188	-1.19602	0.195556	-2.17055	-0.467914	-2.63001	0.00162486	3.10878	1.52214	0.836284
	pseudo4	8519829	8520021	60	Pav_sc0000206.1_g530.1.mk	DEAD-box ATP-dependent RNA helicase 20-like isoform X1	-2.52428	-1.27742	-1.72296	0.495136	2.4647	-0.56871	0.82584	-2.88492	-0.769654	0.628065	2.36719	1.43257	0.000407839	3.096	1.48803	3.40257
	pseudo4	3990911	3991093	60	Pav_sc0000174.1_g1820.1.br	major allergen Pru ar 1-like	-0.251155	-2.77345	-1.78493	1.8143	-2.02494	0.694469	2.00458	-0.265545	2.73152	-1.47505	1.43022	0.657459	1.0325e-05	2.07546	3.16944	1.85922
	pseudo4	5037637	5038073	60	Pav_sc0000183.1_g300.1.mk	phospholipase D alpha 1	-4.28896	-4.41754	-1.66476	-2.59959	0.474647	0.881657	-0.211773	-3.99034	-3.42899	-0.781875	-4.56123	1.15702	6.07546e-06	3.03886	1.30207	2.78753
	pseudo5	2448793	2448968	60	Pav_sc0000227.1_g010.1.br	Unknown	-0.758394	1.87575	2.68003	-1.00863	-0.31346	0.745937	-1.66587	-0.831757	1.07708	-0.48769	-2.83709	-3.06045	0.000303684	-1.84073	-1.83687	-3.45498
	pseudo5	5198199	5198645	60	Pav_sc0000251.1_g110.1.mk	UDP-glycosyltransferase 85A5-like isoform X2	-3.47382	-2.20788	-1.76037	-3.32501	0.18701	0.311005	1.41246	1.04068	-2.25166	-1.48619	-0.106991	0.775413	0	2.04267	3.03437	2.31665
	pseudo5	7873662	7873845	60	Pav_sc0000261.1_g140.1.mk	uncharacterized aarF domain-containing protein kinase 1	-1.08087	-1.25519	-4.37586	-0.453515	-0.698842	1.53916	2.41574	2.42285	0.103156	-0.952453	-1.83591	0.360066	0.00116042	2.17784	3.64683	1.14633
	pseudo6	3186396	3186689	60	Pav_sc0000326.1_g040.1.mk Pav_sc0000326.1_g050.1.br	hypothetical protein CISIN_1g042213mg Unknown	-4.10518	-1.9954	-3.99176	-0.91154	0.300978	0.868781	0.828568	-1.03301	-0.334086	-0.765882	1.0297	-0.971789	0.000529642	3.27142	3.04009	3.07812
	pseudo6	3855017	3855224	60	Pav_sc0000329.1_g170.1.br	Unknown	1.26079	1.3972	2.59705	-1.186	-1.34738	-0.883932	-1.99485	1.16287	2.20447	-2.12309	-0.151146	-0.481997	0.000381476	-3.01115	-0.642358	-2.58551
	pseudo6	7398360	7398582	60	Pav_sc0000355.1_g410.1.br	Unknown	-0.948749	-3.82312	-4.42728	1.95713	-0.711615	-0.549062	-0.616604	1.27017	-2.57351	-1.12117	0.847918	-0.70413	0.00109742	3.0268	2.34716	2.17746
	pseudo6	5796667	5796960	60	Pav_sc0000350.1_g290.1.br	uncharacterized protein LOC103331076	0.119829	-0.480181	-1.68816	1.89077	1.65811	3.69332	2.67442	0.710172	2.39549	2.20517	3.48615	3.04352	0.00137075	3.22761	2.65148	3.50883
	pseudo7	4974830	4975008	60	Pav_sc0000409.1_g080.1.mk	casein kinase II subunit beta-like isoform X2	-1.87984	-1.39101	-1.58473	2.01887	0.918702	0.450249	1.33229	-0.568203	0.302772	2.38054	-0.273279	1.34144	0.000182784	2.8895	2.16576	3.11885
	pseudo7	846637	847259	60	Pav_sc0000376.1_g650.1.br	hypothetical protein PRUPE_ppa025625mg	-3.49812	-4.79393	-3.41278	-1.56991	-1.2781	2.23089	-1.66685	-0.950657	-0.353114	-1.06396	-2.69615	-2.34032	0.000245942	4.63915	2.88637	1.92597
	pseudo7	3216995	3217163	60	Pav_sc0000396.1_g480.1.br	Unknown	3.43428	2.89807	2.3052	-1.53332	1.93002	-1.41238	0.869356	0.814796	0.720054	-0.480391	0.147495	-0.699746	2.97079e-07	-2.35638	-2.14878	-3.24952
	pseudo7	10277137	10277602	60	Pav_sc0000465.1_g240.1.br	putative ribonuclease H protein At1g65750	-1.47158	-3.62585	-3.78245	-1.46385	-0.373786	1.67506	-0.602471	-2.01477	-1.80421	0.531949	-0.0553371	-0.400902	0.000664816	3.07298	1.2133	2.62191
	pseudo8	1212632	1212827	60	Pav_sc0000474.1_g360.1.br	Unknown	1.56827	1.56567	0.783775	1.66731	2.62301	0.664861	0.547705	-2.83403	2.23785	-1.6403	-3.64249	-3.45902	4.89139e-05	0.51422	-0.275258	-3.9588
	pseudo8	1070594	1070821	60	Pav_sc0000474.1_g100.1.br	polyubiquitin 11-like	0.591941	-1.58283	-1.63855	2.17595	1.85202	1.46932	0.470317	1.39797	-1.96042	3.47027	0.310893	3.0022	1.12638e-05	2.33341	0.984275	3.23338
	pseudo1	1212336	1212896	59	Pav_sc0000008.1_g510.1.br	hypothetical protein PRUPE_ppa015116mg	-1.57957	-4.14679	-3.41319	1.19057	-0.0893539	1.26748	1.05538	-4.46046	-3.50007	-2.18613	0.928714	-0.114977	0.00040964	3.5373	2.18963	2.65148
	pseudo1	1310577	1310716	59	Pav_sc0000008.1_g620.1.br	Tag=/pseudo	-0.902278	-0.210701	-2.2898	-2.22308	2.40222	3.57658	0.847071	2.01446	0.388882	1.61726	-1.01435	-3.14542	0.00162144	3.4422	2.15628	1.19676
	pseudo1	10016253	10016376	59	Pav_sc0000044.1_g850.1.mk	UPF0183 protein At3g51130	-1.43387	-2.08223	-1.12088	-3.04513	0.202583	2.7088	2.95865	0.753807	0.80638	0.140024	0.125947	1.72842	8.74129e-05	2.87292	3.39424	2.36887
	pseudo12	2076947	2077205	59	Pav_sc0000800.1_g1110.1.mk	aspartate aminotransferase, cytoplasmic-like	-3.86968	-3.81608	-4.32895	-3.46025	3.14219	1.67782	1.92896	-2.00321	-1.49341	2.77515	0.353516	0.688145	1.549e-07	6.00148	4.54386	5.68538
	pseudo12	5376286	5376478	59	Pav_sc0000832.1_g570.1.mk	double-stranded RNA-binding protein 1-like isoform X1	-2.19604	-1.48289	-2.1976	-2.64969	-0.564484	2.44654	-0.939357	2.75296	-1.33532	-3.33201	-1.95829	0.0588982	0.000357308	2.98506	3.26988	0.816458
	pseudo12	9544858	9545052	59	Pav_sc0000872.1_g220.1.br	Unknown	1.61283	-0.668247	0.321996	-1.31567	-2.69382	0.281374	-1.21768	-4.1994	-0.290199	-3.21515	-2.8938	-3.25337	0.000552674	-1.47879	-1.92293	-3.83047
	pseudo13	6760007	6760625	59	Pav_sc0000980.1_g150.1.br	hypothetical protein PRUPE_ppa020241mg	-1.70294	-3.79967	-2.01723	-0.0301011	-0.99783	0.412167	-0.179694	-1.10622	-2.21073	0.634967	2.29957	1.48334	1.38109e-10	2.16674	1.32047	3.88864
	pseudo14	319787	319939	59	Pav_sc0001025.1_g680.1.br	Unknown	-0.306942	-2.04141	-1.2869	-0.635181	2.59657	1.50472	1.83886	-0.407141	-0.989152	2.15272	3.13776	1.01886	7.21052e-08	2.70541	1.7265	3.38599
	pseudo14	819999	820483	59	Pav_sc0001030.1_g290.1.mk	Peptidase S9A/B/C, oligopeptidase, N-terminal beta-propeller	-4.15524	-3.67224	-2.29802	-0.119614	-1.21679	1.99258	-2.67641	-0.54624	-1.3254	-0.607276	-1.46587	-4.81697	0.000144546	3.97948	1.87596	1.64108
	pseudo14	6264889	6265828	59	Pav_sc0001099.1_g020.1.br	probable glycerol-3-phosphate acyltransferase 3	-5.25296	-2.64518	-4.96488	-1.734	-0.0701597	1.7499	-1.27768	-2.81615	-0.860831	0.346194	-0.187606	1.10328	9.3982e-05	4.40376	2.34111	4.30052
	pseudo14	5325677	5326117	59	Pav_sc0001084.1_g010.1.mk	pyrophosphate--fructose 6-phosphate 1-phosphotransferase subunit beta	-2.00306	-5.90943	-4.82496	-2.73444	0.634627	2.08036	-0.255259	-1.24975	-3.36469	-1.45884	-3.31546	-2.46246	0.00017048	4.2988	2.16906	1.09917
	pseudo15	7112497	7112712	59	Pav_sc0001243.1_g400.1.mk	beta-glucosidase 24-like	-2.12643	-1.76272	-1.77257	2.36507	0.137775	-1.15092	-0.339755	-3.74	-3.38164	1.07674	0.628065	-0.187433	2.61484e-07	3.03731	0.2352	2.47309
	pseudo15	9698252	9698463	59	Pav_sc0001275.1_g510.1.mk	class II knotted-like homeobox protein	-0.0422857	-3.02393	-3.51488	-2.19708	-0.311435	0.603284	2.71353	0.43097	2.12578	1.63936	1.78899	2.12585	2.30118e-06	1.10591	3.3766	3.21029
	pseudo15	8456644	8456868	59	Pav_sc0001260.1_g040.1.br	hypothetical protein	-1.53292	-2.71596	-3.354	0.922886	1.9042	-0.240797	-0.102872	0.666002	-1.4158	-1.04173	0.992556	-1.14666	0.000315392	3.44479	2.28003	2.29712
	pseudo15	3353946	3354107	59	Pav_sc0001196.1_g660.1.mk	magnesium transporter MRS2-4	2.98521	1.70284	1.38217	0.308265	2.62843	0.790166	-1.52779	-1.94874	0.0958913	2.01549	-0.335582	2.57636	2.71684e-06	-0.590616	-3.04075	-0.351589
	pseudo16	10349097	10349316	59	Pav_sc0001440.1_g150.1.br	hypothetical protein PRUPE_ppa020338mg	1.26785	0.626484	0.347252	0.577015	2.46485	2.03051	0.0445258	1.73271	-1.54484	-3.356	-1.99328	-3.9523	0.000448594	1.08708	-0.15322	-3.65941
	pseudo16	9866445	9866667	59	Pav_sc0001428.1_g190.1.mk	Uncharacterized protein isoform 3	-3.289	-4.70044	-4.182	-0.617482	-1.16253	0.395409	-1.63207	-1.46607	-0.325267	0.340956	0.265901	1.08325	-5.5276e-13	3.62342	2.92035	4.54988
	pseudo17	3446301	3446584	59	Pav_sc0001510.1_g170.1.br	Unknown	-3.07189	0.465881	-1.79943	0.547859	-0.0864043	0.597149	1.54429	0.980172	0.706684	1.81861	2.42172	2.84156	0.00217659	1.13173	1.86733	3.16697
	pseudo17	4822774	4822981	59	Pav_sc0001529.1_g210.1.mk	phosphoglycolate phosphatase 2	1.25991	3.03405	-0.0680655	1.18423	-3.52924	-0.818512	2.76284	0.504568	-1.7923	-3.17508	-1.50053	-1.369	0.000998042	-1.97958	-0.441983	-3.76081
	pseudo17	10141276	10141491	59	Pav_sc0001671.1_g080.1.br	putative germin-like protein 9-2	0.685572	-2.40298	-3.34829	-3.60888	-0.210144	1.27826	-0.851432	-1.9734	-1.62324	1.4241	2.96328	2.34932	0.000136664	0.830895	-0.741882	3.03881
	pseudo18	68700	68925	59	Pav_sc0001699.1_g320.1.br	Unknown	-3.00698	-3.12349	-1.22025	-0.370083	2.78905	2.44271	1.87173	-1.08493	1.34868	0.643679	1.86546	1.18159	0.000381768	4.29525	3.32072	3.48328
	pseudo18	8946475	8946803	59	Pav_sc0001869.1_g1060.1.mk	trinucleotide repeat-containing gene 6B protein-like	-3.74335	-1.48773	-3.39394	1.30103	-0.0805679	0.573962	2.29543	0.938659	-0.671989	0.620792	-2.37011	-1.60591	9.48436e-06	3.21813	3.82374	1.96826
	pseudo18	5964020	5964202	59	Pav_sc0001808.1_g100.1.mk	vacuolar protein sorting-associated protein 20 homolog 2	-3.30047	-3.44125	-2.02229	-2.32793	-0.292724	1.87835	-2.12112	1.60712	-2.66658	1.39531	-4.11391	2.32233	1.31944e-05	3.41555	2.96512	4.12823
	pseudo19	2191784	2192223	59	Pav_sc0001990.1_g030.1.br	LOW QUALITY PROTEIN: probable alpha-mannosidase I MNS4	2.41769	-1.59794	-1.08553	-3.95795	-3.37446	-2.05323	-0.533459	0.131874	-1.73713	-1.51645	-2.85445	-1.00383	0.000454577	-3.9351	-1.55821	-2.63898
	pseudo19	6424189	6424462	59	Pav_sc0002156.1_g210.1.mk Pav_sc0002156.1_g220.1.mk	transmembrane protein 19 tudor domain-containing protein 3	-2.96035	-2.08631	-5.63055	-2.66664	2.37426	0.0361775	1.16436	-1.02653	-2.01319	-0.415075	0.631357	0.0805067	0.000952912	4.051	2.95554	3.12717
	pseudo2	10802387	10802733	59	Pav_sc0000098.1_g100.1.br Pav_sc0000098.1_g110.1.br	calphotin-like Unknown	0.0312013	0.303424	2.07949	-1.36183	-2.36079	-0.0412626	-1.39399	-1.7261	-2.63456	-3.56336	-4.59829	-2.69054	0.000301761	-2.0591	-2.94156	-4.52904
	pseudo2	2656632	2656849	59	Pav_sc0000062.1_g440.1.mk	serine/arginine-rich splicing factor SR45a isoform X2	3.06943	-4.13318	-1.75244	-2.48617	-2.10358	2.81992	-3.91344	-4.2423	-5.73721	-1.53082	0.562666	-3.81383	0.000567277	-0.22742	-5.98678	-2.20741
	pseudo20	6057994	6058262	59	Pav_sc0002471.1_g110.1.br	glutamate receptor 2.8-like	-1.32579	-2.09039	-3.06972	-3.82883	1.14987	-3.38299	2.05039	-1.36334	0.753645	-3.06804	-0.989592	1.00138	0.000598736	1.66365	3.04576	1.80176
	pseudo20	2323640	2323865	59	Pav_sc0002341.1_g010.1.br	kinesin-like protein KCA2	-3.58389	-6.64386	-1.72158	1.80531	1.41441	1.53208	0.343454	-2.80426	-2.93679	2.35485	-4.63963	1.87141	1.54132e-13	4.51253	1.95952	4.47407
	pseudo20	4682468	4682708	59	Pav_sc0002433.1_g110.1.br Pav_sc0002433.1_g120.1.br	L-ascorbate oxidase-like Unknown	-1.06769	-3.19173	-2.82543	0.201951	2.39657	-0.473959	-3.30231	0.0342243	-1.75824	2.3015	2.76386	-0.834416	0.000309424	3.29383	0.96566	4.07732
	pseudo21	960541	960767	59	Pav_sc0002722.1_g290.1.mk Pav_sc0002722.1_g300.1.br	cation/calcium exchanger 1 Unknown	-1.93897	-5.09225	-5.53234	1.12288	0.901557	1.89631	-3.06494	-5.46209	0.641732	-3.98613	-5.66573	2.02073	1.84884e-06	4.63929	2.44921	3.73152
	pseudo21	2563525	2563758	59	Pav_sc0002828.1_g160.1.br	putative ribonuclease H protein At1g65750	-1.30658	-2.72012	-1.28633	1.66312	0.906563	1.5732	1.56049	0.839746	2.41789	1.04244	1.58512	-0.823308	0.000320554	3.05296	3.38373	2.54176
	pseudo22	3609479	3609673	59	Pav_sc0003604.1_g010.1.mk	Unknown	-1.21226	-2.0329	0.602194	1.78503	2.72702	2.23214	2.53898	2.29933	3.40752	-0.826354	2.58892	2.0644	0.000167298	2.7506	3.2823	2.29446
	pseudo22	6967711	6967987	59	Pav_sc0003868.1_g050.1.mk Pav_sc0003868.1_g060.1.br	pentatricopeptide repeat-containing protein At1g07740, mitochondrial licodione synthase-like	0.148646	-2.55069	1.45692	-2.62049	-2.11829	0.175523	0.0999763	-1.02363	1.04037	-2.10029	-3.00373	-5.04556	0.00338525	-1.40252	-0.152635	-3.37403
	pseudo22	2562084	2562562	59	Pav_sc0003515.1_g190.1.br	Tag=/pseudo	-2.18066	-5.175	-3.14743	0.323642	0.867788	-2.51538	0.327433	-0.726785	-1.989	0.79572	-0.958953	1.19557	2.104e-05	3.17047	2.54736	3.6524
	pseudo22	6542215	6542386	59	Pav_sc0003835.1_g210.1.mk	zinc finger BED domain-containing protein RICESLEEPER 1-like	-0.468312	-0.643374	2.31769	0.66611	2.31373	2.77948	-1.18831	-3.03846	-2.20098	1.93103	-2.19776	0.285307	1.12291e-12	1.08041	-3.02851	-0.274087
	pseudo24	6327530	6327840	59	Pav_sc0007796.1_g190.1.mk	hippocampus abundant transcript 1 protein-like	-2.83825	-5.26112	-4.674	-3.86329	-3.65417	-0.0559066	2.13871	-1.96009	-3.64708	0.72624	-3.27909	0.904245	0.000191699	2.43648	4.53079	4.14528
	pseudo24	2684168	2684345	59	Pav_sc0006810.1_g010.1.br	Unknown	2.20999	3.22436	3.20616	0.569949	-0.394906	-1.90577	2.13224	-3.47156	1.56653	-2.32252	1.82705	0.498807	0.000198729	-3.20739	-1.64163	-2.16849
	pseudo25	2370294	2370599	59	Pav_sc0010906.1_g050.1.br	NBS-containing resistance-like protein	-3.6121	-1.78104	-3.80319	1.17225	0.369309	2.05284	-1.70415	-2.44284	0.935615	-1.99779	-2.48534	-2.60113	0.00029942	4.11395	2.43526	0.418094
	pseudo3	2463437	2463737	59	Pav_sc0000103.1_g2000.1.br	Unknown	-1.87096	-0.78491	-0.712578	-1.32038	1.40087	1.57063	2.54919	2.4925	1.41697	1.54898	-0.788234	0.106376	0.00134079	2.03777	3.27289	1.64595
	pseudo4	2644293	2644689	59	Pav_sc0000167.1_g070.1.mk	branched-chain-amino-acid aminotransferase 3, chloroplastic-like	-1.70501	-3.79364	-5.33378	1.18849	-2.85606	0.0242294	-0.799977	-1.91937	0.731041	-3.3221	-0.517488	0.609147	9.46889e-05	3.08888	2.63001	2.52548
	pseudo4	6975052	6975387	59	Pav_sc0000200.1_g010.1.mk	carotenoid cleavage dioxygenase 7, chloroplastic	-3.70603	-5.46877	-5.80437	-5.33272	-4.8645	-1.77964	-0.220305	-3.09959	0.838496	-3.88632	-1.67263	-1.78048	8.24811e-09	1.58125	4.56054	2.52156
	pseudo4	1427028	1427508	59	Pav_sc0000157.1_g410.1.br	hypothetical protein PRUPE_ppa022233mg	-1.9365	-4.11843	-1.91921	-1.46697	-0.941222	-1.4948	0.517888	-1.31664	-3.15186	2.30591	0.820597	-0.77713	0.00224901	1.08515	1.73827	3.64468
	pseudo4	6494037	6494229	59	Pav_sc0000195.1_g290.1.br	Unknown	-2.90021	-1.8531	-3.00607	-4.2313	-0.0203105	2.12229	0.480103	-3.62551	-3.8024	0.687881	-2.42386	2.39569	2.76297e-05	3.3329	1.53176	3.72136
	pseudo4	3833733	3834035	59	Pav_sc0000174.1_g1360.1.mk	probable polygalacturonase	-2.23743	-2.7785	-5.65886	-2.14336	-5.67647	-2.16806	1.92189	-1.95327	-3.92282	0.241415	1.57161	-1.35701	8.92533e-05	0.310927	3.44538	3.58932
	pseudo5	9168413	9168743	59	Pav_sc0000274.1_g230.1.br	hypothetical protein PRUPE_ppa026044mg, partial	-1.51727	-3.10429	-2.29432	1.35905	2.35911	1.19854	0.656176	-0.281328	-0.608265	-3.44194	-0.714223	-0.968936	0.000345796	3.89945	2.1899	0.856764
	pseudo6	4027928	4028082	59	Pav_sc0000333.1_g220.1.mk	transcription factor DYSFUNCTIONAL TAPETUM 1	1.07743	2.51462	4.1377	-0.215305	1.20841	-0.83622	-0.86038	-0.540716	-0.58951	2.46582	1.40612	1.99323	0.00090145	-2.76823	-3.74017	-1.06472
	pseudo6	452425	452626	59	Pav_sc0000300.1_g050.1.br	uncharacterized protein LOC103321668	1.60566	0.131404	2.63469	-2.34017	-2.45545	-0.187895	-2.99818	-0.0888459	1.20344	0.145961	-2.68039	0.808677	0.000226876	-3.04065	-1.61941	-1.77972
	pseudo7	300499	300791	59	Pav_sc0000375.1_g540.1.mk	cation/H(+) antiporter 15-like	1.60058	-5.32188	0.179341	-3.07903	-2.74051	-4.23365	1.39249	-2.20244	-3.74174	-0.347964	-2.17032	-0.182773	5.34318e-10	-3.70576	-0.522305	-1.14944
	pseudo7	9197668	9197818	59	Pav_sc0000454.1_g070.1.mk	cinnamoyl-CoA reductase 2-like	-0.339729	-2.31747	-0.350896	1.3457	-0.106722	2.17684	1.72256	-0.281619	-1.51995	2.09495	0.99733	3.50368	0.00108039	2.17079	1.33304	3.31067
	pseudo7	5561930	5562149	59	Pav_sc0000410.1_g690.1.mk	protein-S-isoprenylcysteine O-methyltransferase A-like	0.943215	-1.77816	-0.476423	-1.13644	-0.99783	-1.63786	-2.6889	-2.48947	-5.43073	-0.327753	-4.14808	-3.38501	0.000338743	-1.19972	-3.04112	-1.62811
	pseudo7	3510799	3511039	59	Pav_sc0000396.1_g1130.1.mk	transcription factor UNE12-like isoform X2	1.36471	2.10408	1.26778	0.590523	0.0355812	-0.473627	1.29783	0.804861	-3.20927	-2.29764	-3.34233	-1.0181	1.45482e-06	-1.51365	-1.10557	-3.5441
	pseudo8	6373460	6373652	59	Pav_sc0000502.1_g410.1.mk	11-beta-hydroxysteroid dehydrogenase-like 5	0.180796	-4.00424	-1.25491	1.30019	0.818302	0.914249	2.62904	-3.46463	1.92406	1.46869	2.61438	2.98114	7.96863e-05	1.9199	2.64083	3.37791
	pseudo8	8446106	8446299	59	Pav_sc0000525.1_g350.1.mk	pentatricopeptide repeat-containing protein At2g36240	-4.18272	-5.69801	-4.00125	-5.73864	-4.27128	1.29243	-5.49106	-4.77653	1.96803	0.573697	1.2106	-4.08483	0.000132545	4.20351	4.85965	4.81933
	pseudo8	41733	42069	59	Pav_sc0000467.1_g040.1.mk	uncharacterized protein At4g22758	-2.81423	-1.63969	-4.13675	0.502182	-1.38476	-1.44108	1.60935	0.704733	0.370728	1.94358	1.04239	-0.838093	7.27442e-08	2.05965	3.52224	3.63634
	pseudo9	10245150	10245361	59	Pav_sc0000597.1_g150.1.mk	cysteine-rich repeat secretory protein 38-like	-3.4729	-4.0451	-4.51971	-0.311815	-0.356636	1.53017	1.17446	-1.95236	-2.92261	-0.801262	-0.0461489	-0.00919832	8.21066e-05	4.52595	3.76868	3.70668
	pseudo9	10108148	10108489	59	Pav_sc0000595.1_g1210.1.br	Unknown	-1.61699	-4.07926	-1.38814	-4.94144	-1.15325	-2.57087	2.55618	0.849824	-1.78599	-0.808583	1.09066	-2.60707	0.00101901	-0.238207	3.37752	1.9007
	pseudo9	6474781	6475080	59	Pav_sc0000582.1_g890.1.mk	probable LRR receptor-like serine/threonine-protein kinase At4g08850	0.951512	-1.25187	0.642346	-4.03206	-4.21508	-2.85639	0.299329	-2.14721	-1.76599	-2.35642	-0.288102	-0.46924	2.42454e-11	-3.95138	-1.16125	-1.17263
	pseudo1	5236969	5237105	58	Pav_sc0000027.1_g310.1.mk	actin-related protein 9	-1.39773	-1.98196	-0.0808881	3.39215	2.0209	0.0827824	3.21187	-1.98776	-0.623193	1.8058	-1.60366	-0.285231	0.000253617	3.30674	2.68757	1.55772
	pseudo1	6632097	6632299	58	Pav_sc0000030.1_g890.1.mk	eukaryotic translation initiation factor 5-like	2.45324	-1.23873	0.304842	1.94513	-0.172087	-1.81559	-2.54249	0.82697	-0.822814	-1.87251	-1.33032	-4.13923	0	-0.50664	-1.50678	-3.29393
	pseudo1	4240828	4241087	58	Pav_sc0000023.1_g520.1.mk	putative F-box/LRR-repeat protein At4g15060 isoform X1	-2.93458	-4.91921	-1.09488	-0.460693	0.954313	2.23758	0.127849	-0.339056	-0.88341	-0.66503	-1.19267	-0.040638	0.000561007	3.54564	1.94011	1.69079
	pseudo10	10012930	10013079	58	Pav_sc0000675.1_g1260.1.br	Unknown	-1.64497	-1.76016	-2.44211	2.71238	0.518479	1.04619	1.72411	2.12025	2.65631	-1.95652	2.62076	-0.239553	0.000309005	3.65311	4.12654	3.18281
	pseudo10	10168892	10169288	58	Pav_sc0000677.1_g260.1.br	Unknown	-1.51992	-3.74265	-3.12072	0.833142	0.624047	1.64396	0.906117	-0.3088	-1.20526	0.848103	-0.769921	0.160104	0.000691371	3.58216	2.53255	2.7023
	pseudo10	2515867	2516094	58	Pav_sc0000624.1_g160.1.mk	pre-mRNA-splicing factor 38B	-1.97301	-3.18947	-5.20188	2.47469	-2.64589	-3.10756	-0.518849	-3.23894	-2.43487	1.31513	-0.784816	0.301917	5.89955e-05	3.89744	1.33663	3.45772
	pseudo10	9504304	9504544	58	Pav_sc0000675.1_g320.1.mk	proliferating cell nuclear antigen-like	-0.620655	-4.35085	-3.9224	2.91169	-3.4763	-2.68092	2.20238	-1.88449	0.619514	0.0292921	-2.51375	0.95431	8.90979e-15	3.34389	3.06606	2.0335
	pseudo10	5473176	5473399	58	Pav_sc0000638.1_g860.1.mk	SAGA-associated factor 11	-0.93975	-4.71751	-3.70102	-2.12099	0.10147	0.969387	0.85036	-1.89778	-1.3917	-4.04417	2.14833	1.40323	0.000286626	2.3576	1.9466	3.48805
	pseudo10	3401383	3401578	58	Pav_sc0000624.1_g1770.1.br	uncharacterized protein LOC103320250	-1.40819	-2.89255	-2.13683	0.574419	2.22831	1.74509	0.861501	0.295372	-2.5021	-0.702737	0.0769952	2.15769	0.000471123	3.68872	2.12404	3.05287
	pseudo10	2559569	2559990	58	Pav_sc0000624.1_g240.1.br	zinc finger MYM-type protein 1-like	-3.11023	-5.44851	-4.36662	-2.07162	0.413597	-3.9171	0.243744	-5.12636	-3.52362	-1.20007	0.470011	-1.4532	6.16921e-06	3.12775	2.79562	3.54552
	pseudo11	4229326	4229809	58	Pav_sc0000716.1_g310.1.br	Unknown	-2.49943	-3.23904	-3.26885	-2.35026	-0.94786	-1.82118	0.201127	-0.627167	1.53861	-2.77769	0.447885	1.40229	0.000605277	1.36782	3.60476	3.42561
	pseudo11	9423189	9423377	58	Pav_sc0000761.1_g140.1.mk	Unknown	1.41204	-0.989701	-0.808902	-0.183505	-0.013219	-1.06669	-1.07214	1.26427	-0.758182	-3.43262	-3.62118	-4.88382	0.000205173	-0.669359	-0.106835	-4.16838
	pseudo12	3248706	3248842	58	Pav_sc0000816.1_g140.1.br	Unknown	-0.702818	-0.501292	-1.14685	0.730746	0.482673	0.78963	1.65277	-2.68822	1.62994	0.241662	3.42751	3.08193	0.000799592	1.43291	1.85109	3.5254
	pseudo12	7350160	7350307	58	Pav_sc0000852.1_g460.1.mk	probable WRKY transcription factor 7 isoform X1	3.66382	0.803999	0.780347	-1.00369	2.42775	2.86566	1.17109	-1.904	0.33007	-0.894934	-1.48389	-2.37967	6.72504e-09	-0.293405	-2.09547	-3.89141
	pseudo13	4622453	4622775	58	Pav_sc0000912.1_g200.1.mk	calcium-transporting ATPase 3, endoplasmic reticulum-type	-3.33495	-2.73012	-4.59955	-1.15559	0.304598	1.93107	0.83133	-3.7007	-1.73069	-0.0663766	-3.79974	0.210551	2.15446e-07	4.23933	2.88999	2.90755
	pseudo13	4855063	4855329	58	Pav_sc0000928.1_g040.1.br	Unknown	-1.37639	-2.09706	-2.64732	2.13356	-0.80075	1.36741	-1.28753	-1.03127	-0.598689	0.208286	-1.93557	0.983873	2.99835e-07	3.27614	1.00205	2.12437
	pseudo13	2274704	2274901	58	Pav_sc0000893.1_g1020.1.mk	putative phagocytic receptor 1b	-0.632905	-1.93736	-0.72824	1.71161	-1.44943	-2.6411e-05	0.617158	-2.72504	-0.424749	0.560595	3.09111	1.79607	0.000210461	1.62039	0.686819	3.15741
	pseudo13	3248634	3248806	58	Pav_sc0000908.1_g220.1.br	uncharacterized protein LOC103320902	-0.604588	-1.85103	-2.89634	2.81302	0.558292	0.0168887	0.427269	-1.46367	1.08798	-0.508238	-1.3554	1.27472	3.88857e-05	3.15324	1.842	1.71639
	pseudo14	6202659	6202841	58	Pav_sc0001094.1_g050.1.mk	mucin-17-like	-1.01615	-1.623	-0.676701	-1.88413	-1.97679	0.742533	2.8901	-0.993662	2.49554	1.27895	0.781504	1.92201	0.00162906	0.605481	3.22998	2.45748
	pseudo14	7425556	7425935	58	Pav_sc0001106.1_g210.1.mk	probable helicase MAGATAMA 3 isoform X1	-1.40041	-4.20143	-5.22058	-1.04457	-0.509031	1.47343	-1.26076	-3.0007	-0.870218	1.64001	-0.438774	0.449233	2.53132e-05	3.10737	1.24375	3.50429
	pseudo15	3642390	3642772	58	Pav_sc0001196.1_g1070.1.br	cytochrome P450 98A2-like	-2.90107	-4.97292	-3.95835	-2.45531	-3.24208	0.4756	-2.00082	-0.105655	-1.67634	0.79918	-0.205847	0.194738	0.000807284	2.86721	2.69737	4.02754
	pseudo16	2208102	2208287	58	Pav_sc0001309.1_g1130.1.mk	F-box protein SKIP16-like	-1.7945	-0.799162	-2.06998	2.4248	-0.57346	2.54298	0.553676	-0.0800046	-0.880988	1.30757	-1.04647	0.683491	0.000392434	3.43022	1.4251	2.05178
	pseudo16	2542133	2542452	58	Pav_sc0001313.1_g240.1.br	Unknown	-2.18882	-2.57655	-2.84706	1.81886	-2.28886	1.51784	-1.52564	0.0871677	-1.08136	0.243369	0.472548	0.722911	0.00197465	3.64865	1.83941	3.00487
	pseudo16	6585870	6586333	58	Pav_sc0001392.1_g040.1.br	Unknown	-0.52006	-4.25163	-2.3612	-2.91046	-0.558691	-1.05957	-0.172446	-3.8816	-0.383217	-1.48332	1.65427	2.54591	0.000444875	0.451691	0.866433	3.30663
	pseudo16	8137254	8137529	58	Pav_sc0001406.1_g030.1.br	Unknown	-0.531823	-2.92044	-3.60915	-2.4252	3.17292	-0.686919	2.02395	-3.23811	0.114255	-1.20318	-4.38827	-2.95412	1.02006e-06	3.43949	2.53666	-0.56763
	pseudo16	9951758	9952003	58	Pav_sc0001428.1_g320.1.br	Unknown	0.703279	-1.05496	0.365494	-1.7319	-3.67159	0.55865	0.562185	-3.19236	-0.945529	-4.0723	-5.50336	-2.14623	0.000419514	-0.875202	-0.6907	-3.46646
	pseudo16	866013	866222	58	Pav_sc0001302.1_g390.1.br	putative ribonuclease H protein At1g65750	-4.52154	-0.0488096	-2.92682	0.872065	-0.988269	2.17671	0.83133	1.17197	0.629814	3.13098	1.73726	1.14812	5.51611e-06	2.58599	2.28895	3.64773
	pseudo18	6817016	6817269	58	Pav_sc0001827.1_g160.1.mk	hypothetical protein PRUPE_ppa010406mg	1.13405	1.09521	-2.12444	1.91415	1.74139	-0.606306	0.18424	-1.73052	0.290335	-2.04635	-3.40358	-3.09569	0.000129377	0.7686	-0.777506	-3.3298
	pseudo19	6592334	6592586	58	Pav_sc0002176.1_g180.1.br	hypothetical protein PRUPE_ppa015297mg	-2.3854	-3.28908	-1.89342	2.31968	0.0505343	-0.896424	2.21361	0.489061	2.20256	-1.56688	0.910171	0.038036	0.00117818	3.54396	4.24123	2.5267
	pseudo19	8882604	8883076	58	Pav_sc0002230.1_g130.1.br	isoflavone 2'-hydroxylase-like isoform X1	-4.06975	-4.33361	-4.43998	-4.8497	-2.74218	-4.1921	-1.05361	0.332326	-5.13546	0.3916	-0.941313	2.15759	8.67244e-05	0.621797	3.51077	5.34167
	pseudo19	3624697	3624884	58	Pav_sc0002041.1_g020.1.br	Unknown	1.37744	1.87291	1.80954	-1.67971	0.273271	1.02946	0.931905	-2.37143	1.83882	-2.03864	-2.21164	-1.4637	0.0004011	-1.45511	-0.782344	-3.57084
	pseudo19	6415391	6415662	58	Pav_sc0002156.1_g190.1.mk	Serine/threonine protein phosphatase 2A 57 kDa regulatory subunit B' iota isoform	-3.4384	-4.70141	-2.99947	-4.08333	0.764593	-1.0039	1.74609	-5.44366	0.388221	-1.49833	-2.10034	-3.4352	0.000420488	3.14144	4.19576	1.41012
	pseudo19	7241601	7241916	58	Pav_sc0002195.1_g190.1.br	uncharacterized protein LOC103326007	-4.64324	-2.76444	-5.11246	-1.5387	-2.6966	1.81141	-2.56917	-5.24758	1.09444	-4.05611	-2.78046	1.63859	0.000104424	4.21326	3.43068	3.94114
	pseudo19	3259034	3259198	58	Pav_sc0002019.1_g030.1.mk	uncharacterized protein LOC103329346 isoform X1	-0.801348	-1.20625	-1.24295	1.6966	-0.493545	1.81616	3.36253	0.809243	1.96523	1.52578	-0.027552	2.13383	0.000157839	2.38597	3.47907	2.52855
	pseudo19	9299016	9299190	58	Pav_sc0002234.1_g110.1.mk	uncharacterized protein LOC103335358	4.47328	3.88977	3.61536	0.268908	0.372747	1.1103	3.34519	2.98837	1.79749	2.78185	3.40553	2.54316	1.56467e-07	-3.40334	-1.19199	-1.08083
	pseudo2	4297710	4298011	58	Pav_sc0000069.1_g140.1.br	Unknown	-2.45999	-4.05202	-4.72464	-2.33112	-1.27546	-0.0773506	0.728405	-3.36457	0.665609	0.336347	-1.71891	-3.16759	0.000153582	2.47844	3.57715	2.58366
	pseudo2	8656718	8656879	58	Pav_sc0000093.1_g520.1.mk	probable LRR receptor-like serine/threonine-protein kinase At2g16250	0.452918	-0.348087	1.07407	2.42531	3.16462	3.57196	4.15712	3.2098	3.31538	3.24777	2.55983	2.91493	4.35624e-05	2.6224	3.12054	2.42884
	pseudo20	9526232	9526577	58	Pav_sc0002613.1_g120.1.br	hypothetical protein	-1.25885	-4.05202	-4.08197	-1.09028	0.573338	1.37875	1.13494	-0.843851	0.808184	-1.74365	0.611087	-0.260033	6.69782e-09	3.08486	3.06773	2.30846
	pseudo20	1965153	1965353	58	Pav_sc0002327.1_g830.1.br	hypothetical protein VITISV_025614	-1.66705	-4.73616	-4.27258	-5.52661	2.7586	1.18786	1.40223	-5.028	-4.88355	-3.45633	2.57087	1.30034	5.08997e-05	4.48767	2.74404	4.39373
	pseudo20	6657284	6657584	58	Pav_sc0002479.1_g340.1.br	polyprotein	1.10858	-2.41327	-4.63271	-4.44395	-1.53116	1.58673	-5.43346	-3.47132	-2.65639	-2.74312	-3.54524	0.648396	0.000233701	0.510066	-3.13236	-0.403651
	pseudo21	10754343	10754775	58	Pav_sc0003241.1_g040.1.br	auxilin-related protein 1-like	2.05494	0.209481	-1.83559	-3.40608	-6.02327	-4.24718	1.92481	-0.676419	-0.523971	-1.9784	-0.344501	-3.53797	2.12264e-05	-5.10596	-0.127701	-2.31023
	pseudo21	6456239	6456423	58	Pav_sc0002998.1_g100.1.mk	F-box protein At5g07610-like	0.861803	1.18429	2.408	0.301921	-1.3932	0.551302	0.434917	-0.144323	-2.42289	-1.30896	-0.922747	-2.73995	4.11638e-10	-1.60981	-1.94351	-3.12012
	pseudo21	3307140	3307584	58	Pav_sc0002839.1_g360.1.mk	GDSL esterase/lipase At5g37690	-4.60022	-0.36004	-3.41625	-3.55936	-0.412431	-0.16219	1.79852	-3.58022	2.20039	-0.646859	1.50386	-2.00961	0.000928873	0.920312	3.15793	2.02614
	pseudo21	165915	166128	58	Pav_sc0002690.1_g210.1.br	hypothetical protein VITISV_004106	-1.7351	-2.47571	-1.80043	2.22447	2.69527	2.96863	-1.32387	1.71266	3.43613	0.0822644	3.01323	3.22451	2.42755e-05	4.62848	4.24029	4.59007
	pseudo21	1714592	1714832	58	Pav_sc0002777.1_g010.1.br	probable receptor-like protein kinase At5g39030	-1.69368	-2.46294	-2.29384	2.43704	-1.49422	0.799314	2.24802	-0.0895003	1.36799	1.69596	1.36813	2.85874	6.73233e-05	3.43498	3.57417	4.23481
	pseudo21	4059308	4059492	58	Pav_sc0002862.1_g300.1.mk	RING-H2 finger protein ATL47-like	0.996768	3.46623	0.2849	0.0228967	1.14521	0.323852	-2.1122	-4.01799	-2.29178	-0.528811	-0.593429	2.11128	1.48942e-06	-1.67117	-4.84246	-1.32945
	pseudo21	7735201	7735487	58	Pav_sc0003075.1_g030.1.br	uncharacterized protein LOC103326881	-2.29934	-3.20723	-2.17154	-2.39483	2.78956	0.687888	1.93509	3.29137	-4.38127	-2.47934	2.94854	-4.67889	0.000812939	4.03024	4.67884	3.89548
	pseudo22	3979159	3979381	58	Pav_sc0003620.1_g030.1.br	hypothetical protein PRUPE_ppa017367mg	-1.02904	-0.613936	-3.11492	0.36701	1.19716	1.49467	2.24246	1.17226	2.46061	2.00011	2.12729	2.26076	0.000214463	2.34606	3.31059	3.38614
	pseudo22	5061319	5061792	58	Pav_sc0003709.1_g050.1.br	Unknown	-1.97082	-3.56521	-4.79507	-0.675349	-1.62942	-0.315089	0.00512613	-1.6922	1.42949	-0.736543	0.345282	-2.68017	3.56297e-05	2.22268	3.41504	2.43175
	pseudo22	8068195	8068457	58	Pav_sc0003996.1_g010.1.br	Unknown	-1.15212	2.34959	2.29274	-0.350087	-4.83382	-1.19254	0.815385	-1.18585	-1.15758	-2.62847	-3.89603	-0.792648	6.56288e-05	-3.05483	-1.98028	-3.69581
	pseudo23	2205364	2205734	58	Pav_sc0004637.1_g040.1.mk	hypothetical protein PRUPE_ppa020196mg	-3.21932	-2.4561	-1.39545	2.20222	1.02432	1.6282	0.864208	1.98378	0.491776	-0.467394	-0.494311	-1.28885	0.0016423	3.86035	3.42268	1.45996
	pseudo24	5224567	5224758	58	Pav_sc0007444.1_g040.1.br	hypothetical protein PRUPE_ppa025675mg	-2.65906	-0.919584	-2.26198	-0.584884	-0.172898	1.89578	-0.742715	-1.23958	1.24164	0.652051	0.904605	3.20665	0.0011914	2.55845	1.91877	3.82325
	pseudo25	301127	301718	58	Pav_sc0009939.1_g020.1.br	Unknown	-3.00322	-4.66693	-2.49344	1.55775	-1.13471	-1.7193	-0.123092	-4.12277	-3.14007	1.74307	-2.79044	-0.900836	0.000402811	3.43805	1.6724	3.55924
	pseudo4	6897877	6898078	58	Pav_sc0000195.1_g1110.1.mk	cation transport regulator-like protein 2	-1.24842	-1.21434	-1.64387	1.57533	1.87541	1.65244	-0.483284	1.31868	-1.79954	-1.06525	-3.40358	0.151671	8.33721e-06	3.06289	1.57729	0.522422
	pseudo4	640356	640536	58	Pav_sc0000148.1_g430.1.br	Unknown	-4.68234	-4.7905	-4.66199	-5.09353	-2.72885	-0.612364	2.21472	-3.0413	3.45243	-4.58937	0.418391	-0.483984	1.14614e-10	2.86412	7.09918	4.19111
	pseudo5	1886359	1886621	58	Pav_sc0000220.1_g2170.1.mk	CWF19-like protein 2	-3.00322	-3.45434	-2.68033	-1.13412	-1.20942	-0.314069	-0.772935	-1.18023	-1.52823	0.171269	-0.330686	1.32013	1.10235e-09	2.18588	1.88435	3.57022
	pseudo5	3850490	3850735	58	Pav_sc0000240.1_g250.1.br	Unknown	-2.54221	-4.8968	-0.443449	-1.88748	-1.2101	1.01359	2.41101	-0.136049	1.43807	0.0894195	-0.202917	1.51104	-4.37613e-11	1.53269	3.24828	2.34619
	pseudo5	4347676	4347919	58	Pav_sc0000243.1_g350.1.mk	Unknown	-1.97833	-0.652673	-2.84241	1.30768	1.85022	1.54516	2.33756	1.73161	-0.49524	-2.79303	-0.488369	1.05396	0.000535102	3.12814	3.14179	1.51086
	pseudo5	9354916	9355178	58	Pav_sc0000274.1_g520.1.br	Unknown	0.363342	1.52223	-0.0221574	0.491994	-3.76073	-0.96794	0.10851	0.401011	0.50891	-2.95839	-3.38634	-3.12302	9.9424e-05	-1.36897	-0.428606	-3.92308
	pseudo5	10515133	10515336	58	Pav_sc0000291.1_g180.1.mk	Unknown	-1.21374	-1.76629	-3.46063	-1.89603	-1.14889	-0.833032	2.15132	1.73941	2.98428	-0.250453	-1.18893	1.698	0.000434167	0.650725	4.26565	2.47098
	pseudo6	2842976	2843161	58	Pav_sc0000323.1_g580.1.br	hypothetical protein PRUPE_ppa022735mg, partial	-0.100765	-2.40299	-2.22747	1.75397	3.03383	1.53831	0.421762	0.970327	1.1708	0.80158	1.44239	2.3713	0.00097499	3.43772	2.05555	2.85126
	pseudo6	2167655	2167839	58	Pav_sc0000314.1_g250.1.mk Pav_sc0000314.1_g260.1.br	SKP1-like protein 1A Unknown	-1.1004	-3.08814	-3.30283	1.64414	-1.66909	-0.331741	2.66147	-1.08008	0.871805	1.38751	0.420416	0.222969	0.000218549	2.62741	3.65449	2.9018
	pseudo6	6637561	6637789	58	Pav_sc0000354.1_g070.1.mk	threonine--tRNA ligase, mitochondrial-like	1.52003	-3.70415	-0.453507	-2.1828	-2.36909	1.52578	0.751371	-3.36678	-1.19185	-3.89765	-4.2678	-4.27314	0.000887385	-0.158223	-0.728426	-4.42797
	pseudo7	2827820	2828018	58	Pav_sc0000395.1_g050.1.mk	DEAD-box ATP-dependent RNA helicase 38	-3.35516	-3.9026	-2.86301	0.297784	-1.7342	1.17565	2.62518	0.303416	0.234981	-2.2328	1.08601	1.14751	2.55328e-06	3.64892	4.82826	3.91335
	pseudo7	1029807	1030022	58	Pav_sc0000377.1_g170.1.br	Unknown	1.89369	1.37309	2.80346	1.33359	-0.325852	1.53413	0.409702	1.56636	-2.36318	-0.166202	-3.5292	-1.78757	0.000389129	-1.09639	-1.56708	-3.39002
	pseudo7	3802290	3802447	58	Pav_sc0000399.1_g120.1.br	UDP-glucosyl transferase 85A2	-0.766008	-1.65533	-1.37029	-0.32815	-1.19447	0.217072	-1.81728	-2.14712	2.53158	0.661839	2.33459	2.76217	5.90142e-09	0.89059	2.28345	3.37531
	pseudo8	4213554	4213928	58	Pav_sc0000491.1_g960.1.mk	protein transport protein SEC23-2	-0.24404	0.488148	2.57215	1.14161	-1.988	-3.02152	-3.01545	-2.65861	-2.96895	-1.75535	-5.67619	2.31436	0.00224363	-1.66635	-4.32171	-0.631405
	pseudo1	7936894	7937232	57	Pav_sc0000037.1_g130.1.mk	malate dehydrogenase, mitochondrial-like	-3.5576	-4.71411	-5.03325	-3.87695	-1.04379	1.65168	0.916014	-0.486523	-1.00572	-0.96553	-3.01902	-3.36137	8.10655e-05	4.58868	4.33471	2.25448
	pseudo1	2855161	2855404	57	Pav_sc0000017.1_g080.1.mk	protein NSP-INTERACTING KINASE 2 isoform X1	-0.30084	-5.12346	1.76491	-1.75025	-0.666767	-1.95465	1.24694	-0.321813	0.578894	-6.64386	-3.28988	-1.87597	0.000199467	-1.83865	0.13882	-3.46195
	pseudo10	3847955	3848095	57	Pav_sc0000624.1_g2600.1.mk	flavonoid 3-O-glucosyltransferase-like	-1.9309	-1.46435	-2.65218	2.86246	2.40456	-0.935941	-1.23374	2.42667	0.680822	-2.48534	-2.87041	-2.09911	0.000241063	4.06194	3.24	-0.514282
	pseudo10	2024803	2025178	57	Pav_sc0000622.1_g150.1.mk	uncharacterized protein LOC103342698	-1.65648	-2.05902	-1.91942	-0.362806	2.65545	0.793188	-0.464156	0.728821	0.901109	1.14202	-0.0362315	1.53417	0.000263459	3.42288	2.37093	2.88725
	pseudo11	10492929	10493186	57	Pav_sc0000769.1_g120.1.br	Unknown	2.48142	-1.27204	3.07617	-2.36025	-2.35639	-1.58191	-1.29289	-1.99351	-0.759049	-3.21694	-0.019024	-2.09176	0	-4.31701	-3.52913	-3.44084
	pseudo11	5041312	5041570	57	Pav_sc0000721.1_g020.1.mk	putative disease resistance protein At1g50180	1.07664	-1.91307	-2.87843	0.899973	0.581616	-1.1473	-3.37256	-4.94709	-3.16191	-1.65439	-1.34492	-4.30173	3.48307e-05	0.603259	-3.38276	-1.72009
	pseudo12	868062	868260	57	Pav_sc0000789.1_g290.1.mk	adenylate kinase-like	-0.59854	-0.683886	2.56637	-0.897268	-1.02049	-1.73773	-0.146745	-2.68778	-0.273381	-2.0048	-1.96842	-4.00459	1.87439e-07	-2.43812	-1.93398	-3.66778
	pseudo12	4337926	4338141	57	Pav_sc0000829.1_g270.1.mk	hypothetical protein PRUPE_ppa026175mg, partial	2.46565	-2.04757	1.9654	-3.41872	-0.666654	-1.37449	2.08518	-2.89965	-0.440002	-4.82287	-0.354738	-1.13795	8.32122e-05	-3.12417	-0.919075	-2.92683
	pseudo12	10417189	10417378	57	Pav_sc0000877.1_g1420.1.br	hypothetical protein PRUPE_ppb012111mg	2.11239	0.584082	0.249561	-2.52857	-2.00109	-1.91252	0.614275	0.700667	1.2491	0.31679	-0.669097	-0.255254	9.26959e-05	-3.34777	-0.341769	-1.37031
	pseudo12	10510712	10511109	57	Pav_sc0000877.1_g1630.1.br	uncharacterized protein At2g29880-like	-2.56007	-6.64386	-5.34044	-1.46432	0.813903	-3.48804	-0.0847713	-1.35561	0.462158	-1.97585	-1.21657	0.886102	0.000351915	3.43532	3.73059	3.63228
	pseudo13	802698	802857	57	Pav_sc0000888.1_g090.1.br	Unknown	-2.06849	-3.41291	-2.79261	-4.28454	-3.30995	-3.3384	3.61247	-2.55322	-2.64256	-3.39396	1.91302	-0.199888	0.000137746	-0.925094	4.72002	3.31144
	pseudo13	3860588	3860866	57	Pav_sc0000910.1_g210.1.br	Unknown	0.482662	-1.63524	-0.387299	0.822516	1.75409	-0.395121	0.615642	2.10671	1.68235	-3.13608	-3.93298	-3.46254	5.01687e-06	1.24867	1.86519	-3.20187
	pseudo14	5717270	5717415	57	Pav_sc0001087.1_g130.1.br	uncharacterized protein LOC103336567	1.19296	-0.32073	2.598	-3.34646	-3.04038	-0.345314	-1.01624	0.273871	-1.16936	1.02628	-0.31091	-0.278445	0.000429891	-3.18234	-2.08937	-1.31766
	pseudo15	3235837	3236047	57	Pav_sc0001196.1_g470.1.br	B3 domain-containing protein Os02g0764100-like	-3.94877	-4.22032	-4.09115	-2.74416	2.20306	1.09681	-1.84893	-2.37653	-4.71133	-1.00544	0.658529	-2.23211	4.30995e-06	5.28257	1.52139	3.69251
	pseudo15	8845069	8845310	57	Pav_sc0001267.1_g180.1.mk	mediator of RNA polymerase II transcription subunit 34 isoform X1	2.2544	-3.10599	0.246121	-1.0913	0.619798	2.66689	-1.91261	-2.93474	-2.58284	0.960724	1.45637	1.40107	2.06743e-07	0.460375	-3.43054	0.271559
	pseudo15	3221579	3221893	57	Pav_sc0001196.1_g420.1.mk	MLO-like protein 4	-5.00756	1.30768	-4.06632	-4.52444	-5.26252	0.48391	-3.53721	-4.92954	2.05242	-5.41232	-6.17785	-3.27067	2.87696e-08	-0.805755	0.733573	-4.18678
	pseudo15	326690	327007	57	Pav_sc0001147.1_g150.1.mk	Unknown	-3.65436	-1.7566	-3.38325	0.366048	2.2948	-2.16163	-0.866155	-4.87691	-4.3388	-4.84616	-1.22211	-3.26019	0.000239867	3.76797	0.423715	0.269019
	pseudo16	8420439	8420651	57	Pav_sc0001411.1_g150.1.br	uncharacterized protein At3g60930, chloroplastic-like	-1.7269	-2.35893	-3.7126	-1.84583	2.32498	0.665977	0.928382	-0.740991	0.51479	-1.06465	-1.54056	1.72724	0.00144008	3.58406	2.77723	2.84972
	pseudo18	10473886	10474048	57	Pav_sc0001911.1_g290.1.br	hypothetical protein PRUPE_ppa022177mg, partial	0.0381255	-3.85448	-1.20674	-1.01696	-0.294916	-0.471102	-0.237134	1.12596	-2.25101	2.2822	-0.753144	2.81474	0.000693269	0.409232	1.08369	3.03036
	pseudo19	1250524	1250728	57	Pav_sc0001963.1_g330.1.br	Unknown	-2.9461	-2.46251	-0.386208	-2.56184	0.0225871	0.995372	1.88264	1.82957	0.916543	-1.01816	-1.43696	0.438649	0.000301229	1.56234	3.0844	1.04342
	pseudo19	2363915	2364166	57	Pav_sc0001991.1_g200.1.mk	uncharacterized protein At1g03900	-1.29343	-2.70823	-2.94938	-0.334149	-1.76717	2.44472	0.544611	-1.47311	1.57144	-0.764416	-0.757849	0.717214	1.28741e-05	3.24172	2.79465	2.03214
	pseudo2	4522441	4522587	57	Pav_sc0000069.1_g620.1.mk	cytochrome P450 711A1-like	-0.799476	-3.62211	-0.956272	0.749654	3.02154	-1.2203	-0.0739792	2.22906	1.93772	-0.747801	-0.149719	1.94784	0.000317347	3.12692	3.01532	2.19292
	pseudo21	3404235	3404460	57	Pav_sc0002840.1_g020.1.br	glutamate receptor 2.2-like isoform X1	1.41836	1.03259	-0.00858665	0.74432	-0.894725	0.123056	0.0782392	-2.18376	-4.34157	-3.04087	-3.62569	-2.22206	5.31329e-05	-0.790768	-2.10798	-3.77651
	pseudo21	10701933	10702197	57	Pav_sc0003226.1_g010.1.br	putative ribonuclease H protein At1g65750	-0.928182	-2.93842	-2.72866	0.965193	2.16789	1.01948	0.666985	-1.58951	1.46864	-1.35214	0.962244	1.02195	0.00108728	3.39255	2.53851	2.43752
	pseudo21	7913341	7913588	57	Pav_sc0003087.1_g030.1.br	uncharacterized protein LOC103929856	-1.22521	-2.3779	-4.00136	1.27876	-0.323255	1.88169	1.06056	2.74584	0.725844	3.26193	-1.44208	1.19894	0.000300942	3.33978	3.93604	4.16642
	pseudo22	3437988	3438264	57	Pav_sc0003583.1_g010.1.br	probable LRR receptor-like serine/threonine-protein kinase At4g08850	2.33812	3.00408	3.34585	-1.18298	0.391037	-0.325117	-0.80068	-0.151336	1.81245	-3.39422	-1.45633	-1.03656	-1.03883e-13	-3.18843	-2.22079	-4.61746
	pseudo22	8616513	8616731	57	Pav_sc0004066.1_g030.1.br	putative disease resistance protein At1g50180	0.483218	1.01558	-0.776421	-0.319186	-0.421124	-0.329645	1.0802	-2.56129	-1.53194	-1.812	-4.43582	-2.6064	1.85434e-06	-0.772191	-0.6064	-3.01511
	pseudo23	9453541	9453701	57	Pav_sc0006018.1_g230.1.mk Pav_sc0006018.1_g240.1.mk	uncharacterized protein LOC103337936 isoform X1 C2 and GRAM domain-containing protein At5g50170	0.643811	-2.75216	1.65615	0.7892	-1.71322	-1.74799	-0.545632	-1.91149	-1.66203	-3.66264	-2.81659	-2.96327	0.000382451	-1.0609	-1.94043	-3.79988
	pseudo24	2344926	2345025	57	Pav_sc0006734.1_g040.1.br	Unknown	-1.7138	-6.32223	-6.46394	-4.11156	2.13244	-1.04976	-6.31457	-6.27565	-0.783597	-6.64386	2.02494	2.77161	-4.30384e-13	3.9055	0.883549	5.05261
	pseudo24	8020630	8020887	57	Pav_sc0008462.1_g010.1.br	Unknown	-3.13595	-2.62064	-2.84334	-1.14513	-0.710342	-1.26402	-1.06159	-2.31683	-2.80672	-0.400902	0.793446	0.286907	0.000202947	1.83173	0.984911	3.15807
	pseudo25	1826336	1826562	57	Pav_sc0010641.1_g010.1.br	Unknown	-1.39983	1.42453	1.11994	-3.92794	-4.47876	-3.36535	2.82607	-3.58646	-3.53964	0.587889	1.96307	-1.97951	0.000266832	-4.65686	0.471462	0.111022
	pseudo25	4145022	4145461	57	Pav_sc0012118.1_g010.1.mk	probable sucrose-phosphate synthase 3	0.536886	-0.483957	-2.0651	-0.383742	-2.2425	-2.74016	-2.93315	-3.44348	-4.24061	-1.3978	-0.778767	0.591532	0.000786194	-1.09288	-3.12451	0.0381248
	pseudo3	1900843	1901252	57	Pav_sc0000103.1_g880.1.mk	protein TIFY 6B isoform X1	-0.775433	-0.829693	1.95589	0.211432	-1.37283	-1.25212	1.91227	-4.61397	-2.77163	-2.18681	-3.41435	-2.52987	0.000795332	-1.35588	-0.347205	-3.36876
	pseudo4	10623065	10623273	57	Pav_sc0000212.1_g1850.1.mk	cyclic nucleotide-gated ion channel 1-like	-1.2376	-2.4742	-3.71197	-2.13363	1.0446	2.23749	0.118859	0.95592	0.761188	-1.28299	1.70372	2.11231	3.24254e-13	3.36432	2.7946	3.55423
	pseudo4	5365045	5365201	57	Pav_sc0000184.1_g300.1.mk	endo-1,3	-1.74549	0.41808	0.14478	-1.30118	2.54334	2.05888	-0.0394543	-3.24789	-3.02845	0.675678	3.87603	3.08309	4.7609e-05	1.92462	-1.19009	3.17545
	pseudo4	8794522	8794822	57	Pav_sc0000207.1_g320.1.br	UDP-glycosyltransferase 85A5-like isoform X2	-1.11477	-5.04302	-3.59424	-2.68469	0.418125	-2.20683	1.77339	0.288456	-0.681589	0.283661	0.0196451	1.28368	0.000605599	1.57122	3.19461	3.02068
	pseudo5	825453	825673	57	Pav_sc0000219.1_g060.1.mk	cell number regulator 10-like	2.31224	1.51208	0.604888	0.105143	1.06857	-0.994421	1.67954	-3.09993	-2.7588	-1.5285	-2.67788	-1.15734	0.000695374	-1.34566	-1.42941	-3.29547
	pseudo5	3006324	3006626	57	Pav_sc0000231.1_g390.1.br	hypothetical protein PRUPE_ppa022233mg	-3.99679	-3.45102	-2.7965	-2.82816	-1.68707	-1.23888	1.40079	-0.391337	-0.678225	-1.89336	-3.08315	-0.232887	7.02135e-10	1.55401	3.75654	2.05468
	pseudo5	10470318	10470532	57	Pav_sc0000291.1_g080.1.mk	nuclear pore complex protein NUP160 homolog	-2.18958	-2.96046	-4.25489	-5.55722	-0.595446	1.49793	0.21503	-3.96065	-4.57378	-2.9933	0.465968	3.02198	1.64107e-07	3.1321	1.66304	4.58916
	pseudo5	6627195	6627367	57	Pav_sc0000257.1_g680.1.br	small heat shock protein, chloroplastic	-0.949596	-0.552177	-0.570339	1.80221	2.23491	1.0305	2.27421	3.37855	1.24337	-0.655675	0.013504	-1.67271	0.000420346	2.45028	3.2324	0.0637429
	pseudo6	2289920	2290075	57	Pav_sc0000317.1_g060.1.br	hypothetical protein PRUPE_ppa016677mg	-2.78229	-2.72885	-2.31551	3.84967	-2.07468	2.4047	-2.71962	3.12152	-1.66154	-2.77566	-2.70613	-3.33273	0.000342272	5.32667	4.20547	-0.318862
	pseudo7	5774431	5774589	57	Pav_sc0000412.1_g220.1.mk	calcium-dependent protein kinase 26	-0.984857	-1.82113	-2.76798	1.01225	1.68581	1.66108	1.75132	1.08628	2.32035	-0.349386	0.28776	1.37565	1.40534e-05	3.16667	3.48701	2.29862
	pseudo7	7938982	7939249	57	Pav_sc0000431.1_g210.1.mk	hypothetical protein PRUPE_ppa013500mg	-3.81169	-2.01093	-3.96685	-1.19404	-1.87223	-1.99224	0.946696	-3.10676	-2.65312	-0.0502084	-0.0075324	1.86504	0.000177706	1.327	2.52268	3.86982
	pseudo7	10850419	10850693	57	Pav_sc0000465.1_g1520.1.br	TMV resistance protein N-like	-0.208186	-0.636918	1.41302	-2.12149	-3.88118	-4.48109	0.0187988	-0.238394	0.878584	-3.65238	-0.928168	-0.555578	6.08868e-05	-3.60665	-0.173339	-1.69836
	pseudo8	9223371	9223548	57	Pav_sc0000537.1_g100.1.br	uncharacterized protein LOC103322305	-2.28968	-6.64386	-5.63009	-6.35007	-6.33689	-5.17634	-5.46706	-6.03323	3.50981	-6.18861	3.01982	-6.18245	-6.05353e-13	-2.16645	5.60563	5.11573
	pseudo9	1365371	1365642	57	Pav_sc0000554.1_g310.1.mk	mannose-1-phosphate guanylyltransferase 1	-1.18948	-2.27562	-5.05079	-1.79618	-2.46463	2.15869	0.245559	-1.1956	-3.42066	1.58956	-4.00316	1.74602	0.0022312	2.86953	1.34538	3.2507
	pseudo10	6855280	6855475	56	Pav_sc0000652.1_g1020.1.mk	hypothetical protein PRUPE_ppa022410mg	1.31278	2.86899	-2.8336	0.104127	-0.874027	-3.64856	-3.2289	-1.19307	-1.81734	0.783864	-2.53624	2.65897	0.00048328	-2.54609	-3.58449	-0.274419
	pseudo10	3300840	3301273	56	Pav_sc0000624.1_g1570.1.br	hypothetical protein PRUPE_ppa026896mg	-3.19054	-1.10299	-4.1284	-1.35304	-0.0231468	-0.76251	-0.238902	0.90339	0.303128	1.47568	-2.0069	1.81489	0.000290275	1.63595	2.64386	3.37252
	pseudo10	913704	913994	56	Pav_sc0000615.1_g100.1.br	Unknown	-2.91806	-1.76086	-1.2083	0.973009	2.13959	2.18485	1.55542	0.124795	0.977309	-0.1949	1.53288	1.13752	0.0037839	3.66571	2.80189	2.79441
	pseudo10	3405327	3405547	56	Pav_sc0000624.1_g1780.1.br	Unknown	-1.20424	-2.5488	-3.01235	1.39304	-1.20716	-2.09475	1.85514	0.241607	2.22723	-1.85168	-2.01474	-3.14945	3.97234e-06	2.17599	3.70162	-0.193771
	pseudo11	693048	693287	56	Pav_sc0000691.1_g500.1.mk	hypothetical protein POPTR_0002s09670g	-2.40657	-6.11557	-4.73494	-1.77014	-0.205918	0.566088	-0.530838	-4.37617	-1.19671	-1.73616	-2.58399	0.878203	0.00017397	3.45633	2.29002	3.26021
	pseudo11	4841279	4841584	56	Pav_sc0000719.1_g870.1.mk	peptidyl-prolyl cis-trans isomerase FKBP16-1, chloroplastic	-1.51501	-2.48618	-2.97136	0.897469	0.458477	-1.83022	-1.03566	-0.0421073	-1.64305	1.41118	0.360871	2.01708	4.82898e-06	2.4233	1.43974	3.60695
	pseudo11	10609739	10609936	56	Pav_sc0000772.1_g230.1.mk	uncharacterized protein LOC103344076, partial	0.477708	-2.6661	-1.5231	-0.2621	1.31038	1.14423	1.94745	2.94431	2.94189	2.22965	0.981185	2.55898	7.20175e-07	1.54128	3.3414	2.72595
	pseudo12	9780766	9781351	56	Pav_sc0000875.1_g260.1.br Pav_sc0000875.1_g270.1.br	fibrous sheath CABYR-binding protein-like Unknown	0.277803	-0.493617	0.366119	0.633475	-4.10857	0.0286872	-1.03174	-1.42693	0.292653	-3.94662	-3.00735	-3.7724	0.000291955	-0.288528	-0.622542	-3.61339
	pseudo12	4528884	4529079	56	Pav_sc0000829.1_g660.1.mk	Unknown	-4.46024	-5.0168	-3.87532	-4.15772	3.51824	2.35609	1.63314	2.26387	1.83549	-0.670344	2.53083	3.73011	-7.8235e-13	6.84729	6.31151	7.08975
	pseudo12	9534127	9534574	56	Pav_sc0000872.1_g200.1.br	Unknown	0.321898	1.65367	1.31693	0.227619	-2.12903	-1.53926	0.918857	0.678836	-0.18618	-3.04629	-1.64226	-2.3714	0.00166121	-1.98197	-0.656252	-3.43995
	pseudo12	9555122	9555336	56	Pav_sc0000872.1_g250.1.br	Unknown	1.09848	1.89398	0.806367	0.59884	-0.935507	0.283093	-2.55341	-4.542	-0.678826	-0.94611	-1.32298	-0.352664	0.000554049	-1.22498	-3.18233	-2.16014
	pseudo13	2126400	2126687	56	Pav_sc0000893.1_g790.1.br	hypothetical protein	-4.6804	-4.87384	-4.78326	-4.64715	3.23821	-4.76153	2.59064	-2.17354	1.63847	0.69749	-5.18588	1.58479	0.00048132	6.44194	6.41835	5.4089
	pseudo13	8861285	8861508	56	Pav_sc0001002.1_g030.1.br	uncharacterized protein LOC103444402	-2.33887	-4.14992	-3.32351	-1.21581	1.6005	-2.03815	-0.431167	-2.11057	-1.3927	-0.958114	-1.74729	-1.76902	0.000285043	3.3887	1.93594	1.64399
	pseudo14	1422490	1422759	56	Pav_sc0001040.1_g140.1.mk	box C/D snoRNA protein 1	-0.608643	-3.57851	-5.39315	-2.17331	-1.48097	-0.0233819	2.35303	-0.453976	0.164324	-0.80669	0.128619	2.11767	0.00010773	1.03477	3.18866	2.97578
	pseudo14	1427694	1427928	56	Pav_sc0001040.1_g140.1.mk	box C/D snoRNA protein 1	-1.13553	-1.39416	-1.55803	0.396548	2.18936	3.31273	-0.712773	-2.57567	2.0799	-0.673743	0.219894	-1.74792	0.00010773	3.75015	2.0906	0.830025
	pseudo14	7762346	7762555	56	Pav_sc0001106.1_g750.1.mk	Unknown	-3.14782	-2.49676	-1.58032	-2.81204	1.91788	-1.45471	1.54841	0.84131	0.498074	0.224493	1.72006	0.768963	0.000749732	2.77903	3.29508	3.30398
	pseudo14	8949656	8949913	56	Pav_sc0001114.1_g100.1.br	zinc finger BED domain-containing protein RICESLEEPER 2-like	-4.60562	-2.74958	-4.87295	2.24919	-4.09072	-1.16674	1.89618	2.2242	-2.3016	-1.61701	-2.39202	-0.149779	0.00015269	4.55369	5.26304	2.66287
	pseudo15	9391850	9392143	56	Pav_sc0001272.1_g160.1.mk	hypothetical protein PRUPE_ppa015445mg	-2.53627	-3.70351	-4.05601	-1.78211	-1.04644	0.571711	-1.20698	-1.3158	-5.08159	-3.38236	0.387802	0.896484	0.000399027	2.87016	1.48286	3.40052
	pseudo16	6485183	6485423	56	Pav_sc0001390.1_g050.1.br	beta-glucosidase 12-like isoform X2	-4.74407	-4.88701	-4.70066	0.392423	2.26509	3.16527	2.20754	-4.76551	2.49708	-4.77228	-4.75318	3.11922	2.60557e-05	7.10568	6.55483	6.32151
	pseudo16	1055440	1055682	56	Pav_sc0001305.1_g310.1.br	Unknown	-3.71601	-0.978853	-5.07002	0.487477	-2.81993	2.51801	-0.83156	-2.85273	-3.43297	0.0572007	0.834255	0.29287	0.000250926	3.56771	0.370751	2.72282
	pseudo16	4920192	4920468	56	Pav_sc0001341.1_g680.1.mk	protein LURP-one-related 15-like	-2.2951	-3.43858	-2.67574	-6.1953	-0.731079	1.27558	0.470229	1.80203	-0.050253	-2.6885	-0.685742	1.44455	4.50599e-06	2.74672	3.68957	2.95082
	pseudo17	4614188	4614605	56	Pav_sc0001528.1_g330.1.mk	hypothetical protein PRUPE_ppa024192mg	-2.69326	-3.47979	-2.19477	-0.679105	1.60388	0.427109	0.154163	0.823423	-1.80908	-0.197931	1.0776	0.535139	0.00111313	3.43635	2.77538	3.25968
	pseudo18	6444444	6444726	56	Pav_sc0001818.1_g050.1.mk	cystathionine beta-lyase, chloroplastic	-2.27517	-2.30452	-4.62251	1.30088	-1.30981	0.721083	-1.72759	-2.68268	-1.12214	-0.987573	1.42202	-0.269098	0.00175559	3.32816	1.02843	3.1582
	pseudo18	9612782	9613191	56	Pav_sc0001882.1_g040.1.br Pav_sc0001882.1_g050.1.mk	equilibrative nucleotide transporter 3-like SKP1-interacting partner 15	-1.57255	-3.74068	-1.65768	0.12515	2.02555	0.628443	1.20279	0.766116	-2.3186	-0.626642	-0.318667	-1.75554	0.00158657	3.20393	2.52946	1.26182
	pseudo18	1515807	1515980	56	Pav_sc0001710.1_g1480.1.br	hypothetical protein PRUPE_ppa025765mg	-2.90819	-1.78971	-2.79334	0.108364	1.5246	0.879294	-1.07704	-0.862788	-0.835164	-1.02748	-0.798411	0.774614	0.00149979	3.35406	1.4833	2.29251
	pseudo18	6091146	6091567	56	Pav_sc0001812.1_g040.1.mk	scarecrow-like protein 14	-1.80672	-2.30378	-1.88903	-1.07808	0.275643	-0.659298	1.0735	1.57261	0.99058	-0.00724762	-0.509028	-0.341262	9.96018e-07	1.61154	3.21993	1.71347
	pseudo19	4889953	4890134	56	Pav_sc0002099.1_g020.1.mk	beta-glucosidase 12-like	-1.75336	-1.04432	-4.52654	0.384598	-2.22646	-1.29372	2.71697	-0.641725	1.70635	-1.87276	-0.29589	-1.52318	0.00016345	1.22417	3.66721	0.79935
	pseudo19	7915390	7915616	56	Pav_sc0002207.1_g330.1.br	hypothetical protein PRUPE_ppa026675mg	-0.564875	-1.597	-3.92822	-2.99347	2.19329	-0.891072	1.58788	2.25882	3.05655	1.74877	0.34805	1.79956	0.00010568	2.28842	3.90939	2.91987
	pseudo19	9232665	9232844	56	Pav_sc0002234.1_g010.1.mk	LAG1 longevity assurance homolog 2	-1.01284	-0.547698	-2.0988	1.20968	-0.449741	1.65708	1.58561	-0.953361	1.03297	2.43497	0.924084	2.39432	3.31015e-05	2.13309	1.97723	3.15213
	pseudo2	10127792	10128073	56	Pav_sc0000095.1_g1360.1.br	NAC domain-containing protein 66-like	-1.57284	-5.00127	-4.7752	1.6137	-4.38227	0.703717	0.34609	0.578441	-1.95999	-0.517406	-0.759885	1.80748	4.99124e-05	3.55195	2.90318	3.56784
	pseudo2	1182670	1183028	56	Pav_sc0000054.1_g400.1.mk	putative ribonuclease H protein At1g65750	1.72118	-2.37023	-1.20197	-1.95145	-1.43032	-1.15888	-1.9746	-2.67	-3.68892	-1.82848	-1.28518	-0.601745	0.00115124	-1.86511	-3.00453	-1.5389
	pseudo20	6141280	6141500	56	Pav_sc0002474.1_g100.1.mk	E3 ubiquitin-protein ligase SINAT5-like	-1.3659	-3.58592	-0.923484	-2.05163	2.86715	0.200047	2.5164	1.38024	-0.91841	-0.974413	-0.989851	0.38226	0.000236752	3.12088	3.14845	1.21371
	pseudo20	4542735	4542921	56	Pav_sc0002424.1_g030.1.mk	probable receptor-like protein kinase At1g49730 isoform X2	-0.0358353	-2.16417	-2.64744	2.31166	0.381796	1.09215	0.769017	-2.61642	-1.72355	3.29242	-2.32288	-0.103354	0.000430999	2.62861	0.676009	3.00832
	pseudo20	1831306	1831487	56	Pav_sc0002327.1_g650.1.mk	ubiquitin-fold modifier-conjugating enzyme 1	-4.42684	-4.76161	-4.0945	-3.29067	-4.77887	1.62051	1.24829	-3.82842	-4.39661	1.6842	1.24456	3.28652	1.95012e-06	4.50123	4.13525	6.75639
	pseudo21	5221920	5222144	56	Pav_sc0002918.1_g090.1.br	hypothetical protein PRUPE_ppa018542mg	-2.58818	-4.26904	-2.33372	0.180704	1.31049	-0.554874	1.0192	-3.0007	-0.15199	-2.62908	-5.01661	0.302048	0.000109625	3.36595	2.87312	1.77489
	pseudo21	10612989	10613258	56	Pav_sc0003216.1_g050.1.br	hypothetical protein PRUPE_ppa025194mg, partial	1.18527	0.719421	0.868342	-0.889545	0.63486	-1.91481	1.43451	-1.56558	-1.17133	-2.94541	-2.11144	-1.75261	0.00103113	-1.28517	-0.721534	-3.12643
	pseudo21	5680285	5680524	56	Pav_sc0002963.1_g080.1.mk	probable NOT transcription complex subunit VIP2 isoform X1	-1.50947	-5.06059	-1.98485	0.626524	0.85542	0.951878	-3.54952	1.40927	-2.31578	1.52168	-0.465279	1.85759	1.98377e-09	3.06039	2.21474	3.50972
	pseudo21	6753322	6753509	56	Pav_sc0003015.1_g030.1.mk	U6 snRNA-associated Sm-like protein LSm3	-0.975944	-3.30471	-4.67395	-2.09431	-0.415712	-0.723892	0.471882	0.692705	-2.67418	1.43428	-0.615256	1.78888	0.000294192	1.29258	2.28407	3.39201
	pseudo22	8306566	8306860	56	Pav_sc0004023.1_g100.1.mk	endochitinase PR4-like	2.62883	0.262838	2.76594	-0.410193	0.995455	-1.6428	-0.649826	-2.64544	-1.24569	-0.610597	-1.24078	2.39579	0.00165962	-2.20992	-3.54093	-1.16185
	pseudo22	5295727	5295848	56	Pav_sc0003738.1_g070.1.br	Unknown	2.90126	1.51702	2.73493	0.472627	0.820558	1.26906	-0.190143	-1.13649	-2.56074	0.696556	-1.38949	0.708145	0.000378649	-1.61055	-3.50082	-2.22425
	pseudo22	8989156	8989270	56	Pav_sc0004162.1_g010.1.br	uncharacterized protein LOC103342084	-4.20025	-1.36262	-4.52721	-3.6535	-4.73032	-4.15328	1.45596	-1.58231	0.0738792	1.98246	-1.61445	2.83126	-4.37536e-13	-1.48926	3.08516	4.54941
	pseudo23	4479099	4479240	56	Pav_sc0005028.1_g050.1.br	polygalacturonase inhibiting protein	0.0240199	0.683252	-2.15552	2.9467	1.95298	3.86605	1.96144	0.565436	0.674915	2.04495	0.11183	3.29174	0.00270083	3.20001	1.29189	2.39746
	pseudo23	9531525	9531755	56	Pav_sc0006018.1_g430.1.br	uncharacterized protein LOC103337921 isoform X1	-3.4132	-1.51009	-4.01455	1.16412	-1.30981	1.01178	0.885127	2.32827	-1.21467	0.802019	-2.90198	1.0169	0.000330167	3.20097	3.84828	2.94422
	pseudo24	10271926	10272415	56	Pav_sc0009370.1_g020.1.br	Unknown	0.3862	-0.629252	0.655161	-0.670242	0.0501507	-1.88136	-3.1051	-2.79708	-4.90751	2.49858	-1.54645	-2.20733	0.000344359	-0.866469	-3.58794	0.815678
	pseudo24	10977353	10977595	56	Pav_sc0009731.1_g010.1.br	TMV resistance protein N-like	0.105231	1.62797	2.29086	-0.500904	1.37136	1.01891	-0.189085	2.58774	1.01241	-2.41028	-0.700754	-2.53087	0.000115072	-0.768015	-0.0247183	-3.21395
	pseudo24	2290829	2291240	56	Pav_sc0006727.1_g040.1.br	uncharacterized protein LOC103336041	-3.64761	-4.55903	-3.09666	0.935712	-0.155615	0.937643	1.0569	-0.856126	-1.14303	1.22748	-0.689937	0.479693	6.05215e-05	4.30485	3.68983	4.18721
	pseudo25	7651006	7651433	56	Pav_co4047563.1_g010.1.br	cysteine proteinase inhibitor A-like	-3.56715	-3.28686	-2.56199	-2.47976	0.915563	-2.54511	0.258718	-0.0894855	-4.11593	1.46758	-2.20897	1.26214	0.000223855	2.65087	2.62289	3.91706
	pseudo25	1938708	1938914	56	Pav_sc0010684.1_g010.1.br	hypothetical protein PRUPE_ppa016084mg, partial	-3.00905	-2.99935	-2.10789	1.69001	2.01873	2.50553	-3.49502	0.898664	3.19598	2.01058	2.76833	0.666746	2.61321e-06	4.75082	4.52982	4.69088
	pseudo25	2349996	2350424	56	Pav_sc0010888.1_g010.1.br	uncharacterized protein LOC103330662	-1.54583	-3.48044	1.56553	-0.683881	0.079391	0.111931	-0.995704	-2.10053	-2.73829	-4.0447	-2.54127	-5.11957	0	-0.297591	-1.93915	-3.69917
	pseudo3	9118128	9118300	56	Pav_sc0000136.1_g090.1.br	hypothetical protein	-2.16779	-3.19757	-2.96899	-0.52586	-1.76103	1.26954	2.11004	0.447938	0.957495	0.199589	0.319219	-1.1447	0.000190579	2.8883	4.05295	2.63269
	pseudo4	4094229	4094585	56	Pav_sc0000175.1_g020.1.mk	Unknown	-2.56931	-2.14721	-2.38457	1.87175	0.48322	1.00162	1.18049	0.856139	-0.966023	-0.848153	0.235459	0.613784	0.001425	3.59132	2.96974	2.4779
	pseudo5	1529241	1529484	56	Pav_sc0000220.1_g1400.1.br	hypothetical protein PRUPE_ppa018392mg, partial	0.390211	1.39972	-1.14247	-1.81992	2.79286	0.0936413	1.04996	1.67148	0.53463	-3.92051	-1.70854	-2.56355	0.000214044	0.911504	0.606935	-3.02403
	pseudo6	3395841	3396084	56	Pav_sc0000326.1_g410.1.mk	splicing factor, suppressor of white-apricot homolog	-5.17845	-0.400084	-5.61198	-0.343515	1.10905	1.14682	-2.13419	0.448327	0.668002	-2.90854	0.0136362	2.72651	0.000136472	2.67857	1.98091	3.26766
	pseudo6	3447391	3447555	56	Pav_sc0000326.1_g480.1.mk	uncharacterized protein LOC103326424	-0.808419	-0.839149	0.0991084	1.1498	2.21807	2.88572	2.66058	0.707373	-1.50537	2.6351	2.71609	2.56592	0.000286133	2.69591	1.91627	3.08708
	pseudo7	2411290	2411445	56	Pav_sc0000389.1_g050.1.br	hypothetical protein PRUPE_ppa015582mg, partial	-0.0528936	-0.929734	-0.839057	1.62238	1.60494	3.51214	2.4095	1.76322	0.923154	-0.977771	1.59176	2.72856	0.00107836	3.09756	2.37231	2.3092
	pseudo7	7237508	7237630	56	Pav_sc0000426.1_g190.1.br	Unknown	-0.0920452	-2.63484	-0.651825	2.80021	2.78713	-1.49107	2.92707	3.05717	0.554391	-0.884761	1.28024	2.69884	0.000316571	3.03474	3.32533	2.44684
	pseudo7	4653927	4654329	56	Pav_sc0000405.1_g630.1.br	putative F-box/FBD/LRR-repeat protein At4g03220	-1.20898	-3.87024	-0.982945	0.873416	1.51353	2.44825	0.615861	-0.985491	-2.84229	-1.21284	1.0472	0.136291	0.000942863	3.33272	1.1124	1.83687
	pseudo7	3090663	3090860	56	Pav_sc0000396.1_g260.1.mk	transcriptional regulator ATRX	1.26244	-1.10826	0.525027	-1.65433	-0.778673	-2.33251	1.80693	-3.18972	-0.560297	-3.1029	-3.17507	-2.48429	0.000266074	-1.96859	-0.00507074	-3.40603
	pseudo8	2800620	2800753	56	Pav_sc0000482.1_g440.1.br	fibrous sheath CABYR-binding protein-like	-3.88522	-0.169276	-1.27312	-4.50516	1.96556	1.3118	-0.250829	2.41561	2.54982	2.54264	-3.58799	0.96854	4.21432e-07	2.23037	3.1338	2.52079
	pseudo8	4836065	4836259	56	Pav_sc0000493.1_g190.1.br	hypothetical protein PRUPE_ppa027215mg	-0.180955	-0.982689	-1.3405	-3.18013	1.79916	-2.06042	-0.53107	1.06596	-1.73992	0.877015	3.05652	2.43986	0.000271033	1.1031	0.790932	3.12748
	pseudo8	770237	770583	56	Pav_sc0000471.1_g020.1.br	predicted protein	1.15046	0.754087	1.44143	-1.12282	-2.73157	1.93814	-1.23748	-0.44332	0.589993	-2.08778	-3.14738	-2.10817	0.0013992	-0.576168	-1.31331	-3.5131
	pseudo9	10113557	10113940	56	Pav_sc0000595.1_g1220.1.mk	cationic amino acid transporter 2, vacuolar	-1.65945	-2.41501	-1.75452	-1.57795	-2.41726	0.437202	2.57545	1.22884	0.425093	-2.08383	-0.357416	0.541312	0.000100707	1.22892	3.59123	1.62668
	pseudo9	121196	121384	56	Pav_sc0000549.1_g250.1.br	disease resistance protein RPM1-like	-1.39678	-1.53651	-1.59266	2.4531	1.47446	-1.32784	3.30864	-0.0283808	-1.89836	2.05203	3.87566	1.55436	0.00145875	3.03453	3.4012	4.3651
	pseudo9	3702551	3702717	56	Pav_sc0000558.1_g490.1.mk	uncharacterized protein LOC103334259	-3.13559	-3.56065	-4.35824	-3.95254	0.270162	-1.70021	0.153437	-1.10039	-2.85871	1.93023	-1.1253	-3.38787	1.42133e-06	2.67405	2.79515	4.14172
	pseudo1	4981597	4981884	55	Pav_sc0000026.1_g620.1.br	putative ribonuclease H protein At1g65750	-1.4813	-2.87878	-4.54105	-0.679656	-2.12021	1.31772	1.11745	-1.63786	2.8147	2.6481	-1.51759	1.3781	5.57725e-05	2.63969	4.14877	4.10109
	pseudo1	3308880	3309234	55	Pav_sc0000017.1_g750.1.mk	rho GDP-dissociation inhibitor 1-like	-1.7866	-2.97734	-2.21251	1.25476	-0.714576	0.0236508	2.29248	-4.51442	-1.37487	-3.08243	-1.94876	-0.996019	0.00410928	2.66504	3.07433	0.473732
	pseudo11	6256534	6256848	55	Pav_sc0000738.1_g190.1.mk	hypothetical protein PRUPE_ppa017821mg	-1.81475	-3.54689	-3.08269	0.455799	0.201865	-2.41022	1.28574	-0.996509	-1.19156	0.869245	1.98088	0.20757	2.71087e-06	2.4737	2.79128	3.82809
	pseudo11	3940844	3941139	55	Pav_sc0000714.1_g230.1.mk	protein farnesyltransferase/geranylgeranyltransferase type-1 subunit alpha	-2.89357	-2.22764	-3.2878	-1.8681	2.65513	2.08379	2.14419	-0.921664	0.63378	0.801816	-4.0411	1.63882	0.000151358	4.58507	3.85092	3.44861
	pseudo12	1628811	1629018	55	Pav_sc0000800.1_g340.1.mk	early nodulin-93-like	-1.15892	-1.21613	-0.659741	0.613032	0.879689	1.36567	2.97869	2.90998	2.78758	1.30169	2.5904	1.30048	0.000387981	1.97625	3.88343	2.85722
	pseudo12	3248281	3248447	55	Pav_sc0000816.1_g140.1.br	Unknown	-1.44943	-0.15614	-0.989228	2.25215	0.0357839	3.09407	0.527934	-0.509882	3.02275	2.3909	1.15038	2.812	0.000799592	3.01919	2.53897	3.03513
	pseudo12	8087367	8087567	55	Pav_sc0000861.1_g090.1.mk	putative disease resistance protein At3g14460 isoform X2	-2.49832	-1.55588	-2.30356	2.24774	1.29736	-0.919803	1.73225	-0.401011	-3.70792	-0.624962	1.11782	-0.540035	0.000287926	3.42614	2.5299	2.28458
	pseudo12	6834026	6834267	55	Pav_sc0000848.1_g650.1.mk	Uncharacterized protein TCM_004570	-2.37212	-2.19989	-1.3226	2.33903	-0.649069	-0.0273555	1.13417	0.987295	-1.47642	-2.69399	-1.41965	-1.53608	0.000417155	3.04242	2.48455	0.107201
	pseudo13	3502680	3502939	55	Pav_sc0000909.1_g250.1.mk	formate--tetrahydrofolate ligase	-0.973287	-2.39382	-3.53141	-1.34438	-0.237269	1.39891	2.19873	0.187737	-0.82197	-0.632508	-4.13819	-1.46537	0.000335902	2.30296	3.0015	0.436684
	pseudo14	6810023	6810417	55	Pav_sc0001102.1_g880.1.mk	nipped-B-like protein B	-5.30101	-5.69844	-6.64386	-0.149597	-3.24898	-4.32618	-0.523511	-1.45392	2.52014	-1.51348	0.437618	-4.8905	1.74672e-06	4.27371	6.95928	4.99208
	pseudo14	7680849	7681229	55	Pav_sc0001106.1_g620.1.mk	sterol 3-beta-glucosyltransferase UGT80B1	-1.85553	-3.94701	-3.88768	-1.47184	-1.65823	-1.42678	-0.783378	-3.05419	-2.16403	0.401048	-1.0844	1.54985	9.67584e-05	1.36022	1.17757	3.52954
	pseudo14	6105086	6105438	55	Pav_sc0001091.1_g370.1.mk	ubiquitin-like-specific protease 1A	-3.9197	-1.27777	-1.60843	0.814374	0.791026	2.89845	0.774531	0.0188928	1.20226	0.3094	-2.55567	-0.0158076	0.000305789	3.76252	2.63939	1.57238
	pseudo15	5857876	5858035	55	Pav_sc0001222.1_g430.1.mk	phosphoinositide 3-kinase regulatory subunit 4	-2.1231	-1.63075	-2.7687	0.814286	1.71626	-2.43949	1.8018	-5.45304	-2.02995	0.527168	2.54819	-1.55905	7.57427e-05	2.90263	2.42472	3.44779
	pseudo16	1593444	1593906	55	Pav_sc0001308.1_g320.1.br	hypothetical protein PRUPE_ppa025422mg, partial	-0.527691	-3.18476	-1.72002	-0.257158	2.87621	1.26517	2.18666	-0.783179	-0.959765	2.52603	1.05583	1.91407	0	3.25671	2.35078	3.39009
	pseudo16	6791413	6791618	55	Pav_sc0001392.1_g450.1.br	pentatricopeptide repeat-containing protein At5g66520-like	-0.861106	-1.21716	-4.55477	-3.03932	0.3986	2.05121	-0.197606	1.12574	-4.11983	1.68597	1.78088	0.733453	0.00010886	2.44831	1.60459	3.02289
	pseudo16	4179871	4180190	55	Pav_sc0001338.1_g070.1.br	putative ribonuclease H protein At1g65750	-2.95929	-3.59389	-3.79677	-0.314604	-1.30852	0.467581	-1.76981	-1.61221	-1.78837	0.265903	-0.0426801	-0.0576114	0.000263008	3.19262	1.68303	3.46739
	pseudo17	6400376	6400591	55	Pav_sc0001556.1_g050.1.mk	uncharacterized protein LOC103336375 isoform X1	-3.03972	-2.5485	-1.67766	1.53448	-2.09961	1.33481	2.65937	-1.20594	2.11146	-1.88002	-0.270538	-1.52022	0.000679027	3.2236	4.19358	1.26007
	pseudo18	10045656	10045824	55	Pav_sc0001900.1_g090.1.mk	leucine-rich repeat receptor-like protein kinase	-4.89351	-1.90912	-4.37586	-0.0967735	-0.563082	0.327822	-2.13891	-3.54699	-5.84852	-2.99034	-5.01584	1.44342	4.24445e-06	3.04216	-0.0770597	3.04684
	pseudo18	568113	568316	55	Pav_sc0001708.1_g020.1.mk	scopoletin glucosyltransferase-like	2.98868	2.21371	2.50215	-0.934374	2.22688	3.09097	1.17516	-0.715484	0.411451	0.0966328	-2.62107	-0.935172	5.71221e-13	-0.410394	-2.11972	-3.37784
	pseudo20	8946305	8946660	55	Pav_sc0002589.1_g010.1.mk	probable 2-carboxy-D-arabinitol-1-phosphatase	-1.13883	-1.4958	-3.67613	0.739622	0.620199	2.47611	1.7974	-1.67887	0.972559	2.13653	0.400846	0.668558	0.000882905	3.30579	2.69679	3.04233
	pseudo20	9129474	9129668	55	Pav_sc0002598.1_g150.1.mk	uncharacterized protein DDB_G0274915	1.27007	-1.39924	1.9	-0.818663	-3.26704	1.68968	-3.28189	-2.92659	-2.5617	-1.12159	-2.34567	1.50983	0.000216316	-0.743282	-4.01413	-0.896497
	pseudo20	3437357	3437903	55	Pav_sc0002373.1_g170.1.br	uncharacterized protein LOC103331420	2.48451	1.5102	-1.51741	-1.45643	-4.2579	-0.775338	0.465228	-1.31831	-1.03866	0.624999	-0.34209	1.10654	0.00123158	-3.13524	-1.95494	-0.97165
	pseudo21	4152334	4152493	55	Pav_sc0002862.1_g550.1.mk	armadillo repeat-containing kinesin-like protein 3	-0.727853	-1.31838	-2.25763	0.0845059	0.116024	1.16931	1.30088	-0.739845	-3.74757	2.16725	2.36634	0.393677	0.000289788	1.85559	1.36976	3.17475
	pseudo21	9026469	9026664	55	Pav_sc0003135.1_g600.1.mk	katanin p60 ATPase-containing subunit A-like 2 isoform X1	-2.61907	-1.6865	-2.48542	-1.72514	1.04228	-0.993514	1.70842	1.00142	-4.85776	-4.12758	-0.0608619	-0.191063	7.54947e-06	2.13513	3.02421	1.53681
	pseudo21	6042103	6042257	55	Pav_sc0002980.1_g010.1.br	Unknown	-5.38124	-4.92441	-4.83906	-5.83568	2.27675	2.55603	2.90227	0.311681	-6.13784	-4.75474	-1.02496	-1.31884	4.504e-05	6.86988	6.57059	3.33864
	pseudo21	2416942	2417059	55	Pav_sc0002826.1_g010.1.br	uncharacterized abhydrolase domain-containing protein DDB_G0269086-like	-0.283856	-0.294606	-0.549584	-1.5325	3.89259	0.523223	2.37979	1.61837	3.46498	2.57219	0.677978	-0.107347	0.00176713	2.84208	3.05776	1.8692
	pseudo22	10508216	10508440	55	Pav_sc0004341.1_g040.1.br	hypothetical protein PRUPE_ppa026197mg, partial	-1.57658	-2.95958	-2.3156	-0.521988	1.98923	-0.092828	0.841848	-2.68395	-1.29626	-0.791366	-2.59836	0.60688	0.00126524	3.07576	1.82502	1.76928
	pseudo22	5673977	5674167	55	Pav_sc0003759.1_g130.1.mk	probable ubiquitin-like-specific protease 2B	-2.31053	0.135005	-1.62356	2.4869	2.69504	1.6006	0.966592	2.47877	0.852733	-1.05033	-0.465535	2.79789	0.000692794	3.21808	2.52281	2.32905
	pseudo22	2585987	2586325	55	Pav_sc0003517.1_g010.1.br	putative wall-associated receptor kinase-like 16	-4.55256	-5.85601	-3.40859	-1.9615	-3.28534	1.98822	2.1523	-1.93067	-3.57756	0.822981	-2.1429	-0.0177265	0.000532993	4.81185	4.959	4.27545
	pseudo22	6700476	6700770	55	Pav_sc0003845.1_g170.1.br	zinc finger MYM-type protein 1-like	-3.33628	-5.43178	-6.49377	-0.299646	-1.90374	-1.37042	-0.479898	-2.57241	-3.73438	0.485807	-2.37182	-0.0866447	0.000250171	3.4599	2.84907	4.24968
	pseudo23	2298327	2298571	55	Pav_sc0004658.1_g010.1.mk	Unknown	0.758339	1.48451	0.246392	-1.83146	-0.42824	-3.0332	0.746352	0.312671	-0.218976	-2.07673	-1.68896	-3.51379	1.65026e-09	-2.30788	-0.586973	-3.16062
	pseudo23	7048715	7048869	55	Pav_sc0005527.1_g060.1.mk	plastidic glucose transporter 4	-2.4486	-2.28041	-1.23324	2.2166	0.912306	0.303047	0.701446	-1.4605	0.795937	1.21653	-0.607708	-1.28216	0.000108821	3.25296	2.19372	2.05804
	pseudo24	6541040	6541224	55	Pav_sc0007908.1_g020.1.br	LOW QUALITY PROTEIN: DEAD-box ATP-dependent RNA helicase 2-like	-1.61921	-2.55918	-2.73842	-2.5985	-0.558392	-2.84892	-1.29979	1.57622	-2.59114	1.73052	0.759148	-1.17316	0.000357416	0.607769	2.462	3.07997
	pseudo25	4734014	4734253	55	Pav_sc0012650.1_g010.1.br Pav_sc0012654.1_g010.1.mk	glutamate receptor 2.8-like peroxidase 4-like	-2.39339	-4.97726	-3.77396	-2.17258	-0.247928	0.914901	-2.455	-3.56517	-4.82139	-3.00352	-2.2973	0.631427	1.82032e-05	3.32072	0.0340416	2.66893
	pseudo25	3916744	3917030	55	Pav_sc0011906.1_g010.1.br	Unknown	-6.64386	-0.419504	-6.64386	0.870901	1.02232	1.78836	0.905557	-0.681239	-2.13544	1.07587	-0.1091	2.03166	1.56184e-05	3.25212	1.82741	3.21409
	pseudo3	7838335	7838436	55	Pav_sc0000130.1_g090.1.mk	bromodomain and WD repeat-containing protein 3-like	-1.45958	-0.763	-1.03873	0.185663	0.641178	2.36635	2.98504	-0.399045	1.11772	2.42595	0.83934	2.1286	2.18492e-09	2.44761	2.91338	3.00238
	pseudo5	8923651	8923928	55	Pav_sc0000271.1_g090.1.mk Pav_sc0000271.1_g100.1.mk	LOW QUALITY PROTEIN: NAC domain-containing protein 89-like bifunctional riboflavin kinase/FMN phosphatase-like	-2.52507	-3.88669	-1.14833	-5.37142	-3.43377	-0.0237797	-0.529109	-2.69077	-0.985493	0.623277	-0.302556	2.10066	0.000102214	0.668107	0.966217	3.26138
	pseudo5	4939934	4940137	55	Pav_sc0000247.1_g040.1.br Pav_sc0000247.1_g050.1.br	Unknown Unknown	-2.03112	-3.85301	-3.53296	-0.303555	-1.97647	-0.462801	2.89074	-3.61972	-2.71716	-1.57611	0.661135	-1.57744	0.000672164	2.1609	4.25643	2.49206
	pseudo6	8427290	8427761	55	Pav_sc0000359.1_g640.1.br	G-type lectin S-receptor-like serine/threonine-protein kinase SD2-5	-2.36457	-6.01358	-4.6745	-0.260544	-3.12628	0.776539	-1.26195	-2.28133	-3.03529	-2.10246	-1.10438	-1.5649	0.00162349	3.41955	1.58154	2.05784
	pseudo6	10421207	10421418	55	Pav_sc0000373.1_g400.1.mk	protein MCM10 homolog	-2.6056	-3.41975	-1.66824	1.98431	0.627895	-2.76184	1.85371	-0.64754	1.98928	2.02804	-2.21883	0.224275	0.000517577	3.30307	3.84463	3.25425
	pseudo6	10208329	10208574	55	Pav_sc0000373.1_g060.1.mk	putative amidase C869.01	-2.15563	-0.939342	-3.20544	-2.70436	-0.362965	1.98835	1.32527	1.84872	2.40653	0.0414259	-0.0343544	0.266817	1.08008e-07	2.5196	3.73933	1.90917
	pseudo6	10209261	10209393	55	Pav_sc0000373.1_g060.1.mk	putative amidase C869.01	1.46099	-0.260119	1.5442	-2.6111	1.15185	0.996897	-2.68408	-3.3706	-2.42316	-3.16579	-0.984221	0.414396	1.08008e-07	-0.57004	-3.89002	-1.73819
	pseudo6	5853179	5853500	55	Pav_sc0000350.1_g560.1.br	uncharacterized protein LOC103336347	-4.7138	-2.21523	-1.13461	0.613716	2.74417	2.46718	1.9165	-1.56585	0.962437	-0.163876	2.67226	0.646875	0.000671723	4.2787	3.09597	3.63915
	pseudo7	7537939	7538176	55	Pav_sc0000428.1_g480.1.mk	probable GPI-anchored adhesin-like protein PGA55	-2.41013	-4.84859	-2.71828	-1.19737	-0.431416	0.164685	0.795996	-4.35484	-3.78311	-1.29783	-0.00145988	1.9856	8.11853e-14	2.61651	2.30938	3.83964
	pseudo8	8906279	8906649	55	Pav_sc0000535.1_g010.1.br	Unknown	-2.71991	-3.12973	-1.04681	1.61996	-0.316344	1.70287	-2.79577	-2.01247	-1.92762	-0.305334	-1.20271	0.138055	0.000119553	3.24926	-0.196151	1.64396
	pseudo9	10628263	10628519	55	Pav_sc0000598.1_g480.1.br	hypothetical protein RR46_13577	1.05184	-3.49248	1.70463	0.500933	-0.531477	-0.47285	1.14116	1.45502	-0.73563	-4.44211	-1.3049	-4.09353	0.000242861	-0.939153	0.0332145	-3.41202
	pseudo9	9573542	9573828	55	Pav_sc0000594.1_g040.1.mk	Unknown	1.14522	0.0163806	1.21156	-3.25444	-1.74765	-1.67551	-0.458882	0.186765	-2.12778	-3.59059	-2.59843	-2.93406	8.31277e-05	-2.95236	-1.403	-3.86949
	pseudo9	7181664	7181894	55	Pav_sc0000583.1_g1230.1.br	putative F-box protein At1g47790	-2.8053	-3.77207	-4.1515	-2.77955	-1.42813	1.61143	-1.37863	-0.693818	-0.544656	-0.631773	-3.82727	-1.5465	0.000347101	3.71258	2.63114	1.9571
	pseudo9	7292473	7292622	55	Pav_sc0000584.1_g090.1.br	sentrin-specific protease 1-like	-0.221033	-0.495242	-0.449722	-0.107668	2.11089	1.83121	3.11006	2.20227	1.60132	2.54264	3.04281	3.76028	0.00033284	1.93712	2.82281	3.58617
	pseudo9	4403049	4403260	55	Pav_sc0000567.1_g060.1.mk	transcription factor TT2-like	-2.74704	-1.21724	-3.30476	0.189572	-0.819001	-1.22048	1.05834	1.62598	-0.901276	-0.976818	1.11346	0.462792	0.000439444	1.65103	3.06794	2.57375
	pseudo1	10191148	10191307	54	Pav_sc0000045.1_g050.1.mk	hypothetical protein PRUPE_ppa026896mg	3.08259	1.86748	1.51423	-0.6224	-0.5819	-0.883634	-0.164931	-0.333966	1.00339	-0.278696	-0.80458	-2.05275	0.000121546	-3.0096	-2.02102	-3.19281
	pseudo10	3792619	3792877	54	Pav_sc0000624.1_g2530.1.br	hypothetical protein PRUPE_ppa014800mg	-3.51745	-4.19952	-2.69702	0.844469	0.693022	0.0201733	0.690715	-1.75317	-1.66457	-1.85818	-1.99533	0.255835	3.71618e-05	3.90262	2.91107	2.53947
	pseudo10	3168077	3168297	54	Pav_sc0000624.1_g1380.1.mk Pav_sc0000624.1_g1390.1.mk	macrophage migration inhibitory factor homolog poly(rC)-binding protein 3	-2.55991	-3.69954	-1.19677	-0.787036	0.473852	0.535867	1.06695	0.616085	1.00433	0.0369013	-0.371169	-0.245607	0.000358911	2.32367	3.04453	1.95236
	pseudo10	5702442	5702807	54	Pav_sc0000639.1_g130.1.br	Unknown	-2.6856	-0.967933	-1.78268	0.160227	1.31334	-0.420396	2.78151	-1.72986	0.923968	0.903217	0.634285	-3.50707	0.00376693	2.18389	3.24475	1.87455
	pseudo10	6191509	6191718	54	Pav_sc0000648.1_g420.1.br	Unknown	-0.717621	-3.04356	-1.38109	-0.149262	0.125905	-0.128129	1.0374	1.61461	3.15197	0.872673	0.216803	2.37435	3.39353e-05	1.38513	3.65286	2.87693
	pseudo10	7740405	7740785	54	Pav_sc0000659.1_g580.1.br	Unknown	-5.71353	-6.1624	-2.17359	1.29994	-1.06147	-0.77555	-3.69368	-3.40258	-5.81527	-0.952241	-3.34604	-1.89465	4.40877e-08	3.79109	-0.425655	1.79556
	pseudo10	7741723	7741944	54	Pav_sc0000659.1_g580.1.br	Unknown	-2.30932	-4.40212	-2.77657	-1.52057	-3.29298	1.95094	1.91452	-2.13415	-0.432231	-1.50967	-2.06551	0.835358	4.40877e-08	3.45008	3.58463	2.58767
	pseudo10	8513710	8513887	54	Pav_sc0000666.1_g020.1.br	Unknown	1.7866	-0.239117	-2.39443	-3.3946	-2.54879	-1.85673	1.72865	-3.8196	-4.01462	-0.519019	0.72139	-1.15676	0.000167023	-3.04931	-0.380615	-0.682986
	pseudo10	8383756	8383910	54	Pav_sc0000663.1_g340.1.br	putative ribonuclease H protein At1g65750	-1.01991	-1.6473	-0.78288	2.02019	2.79605	0.828418	0.259307	0.305797	0.670561	0.711402	0.456341	0.597975	0.000154356	3.19673	1.53008	1.69849
	pseudo10	3965888	3966018	54	Pav_sc0000625.1_g200.1.mk	serine carboxypeptidase-like 18 isoform X3	-1.8563	-3.5962	-1.10823	-2.14394	-0.374836	1.88676	1.08507	0.470319	-0.0330409	1.54967	1.25431	0.376274	3.01841e-05	2.51278	2.44637	3.00637
	pseudo10	8408800	8408942	54	Pav_sc0000663.1_g390.1.mk	zinc finger protein 346-like	-0.360351	-2.50042	-2.69139	-2.19119	1.72998	-2.29129	0.900141	-1.74802	2.61775	0.972752	-2.47639	3.56929	0.000149605	1.752	2.90221	3.65742
	pseudo11	10830324	10830613	54	Pav_sc0000775.1_g040.1.mk	GDP-mannose 3,5-epimerase 2	-1.08382	-3.84919	-2.56739	1.81726	0.682243	0.654338	0.0841461	1.38928	-1.63269	0.381405	0.914345	1.92167	0.00372574	3.2391	2.49509	3.29676
	pseudo11	5491978	5492206	54	Pav_sc0000731.1_g070.1.mk	mitogen-activated protein kinase kinase kinase 3	-0.396668	-5.18096	-4.28031	0.275625	1.1581	-3.92558	-0.618591	0.875285	1.2412	-0.623863	-3.05245	2.82046	0.000400957	2.06451	2.53175	3.2235
	pseudo11	607696	607857	54	Pav_sc0000691.1_g340.1.br	Unknown	-0.0788753	-2.71742	-1.48961	1.71031	2.56415	-0.0164674	2.84485	-1.11499	2.98445	2.6368	1.19212	-1.2603	0.000198821	2.80599	3.41882	2.61637
	pseudo11	9824237	9824461	54	Pav_sc0000764.1_g060.1.br	Unknown	-2.35509	-2.49218	-4.34642	0.344855	-2.7108	-1.45588	0.551469	1.50686	0.28727	0.47348	-2.51485	2.30036	5.08442e-05	2.08127	3.7102	3.94154
	pseudo11	1302946	1303194	54	Pav_sc0000700.1_g050.1.mk	probable linoleate 9S-lipoxygenase 5	0.741258	0.604384	-1.18545	-5.0084	-3.24167	-1.2456	-4.3743	-4.49036	-3.60448	-2.38659	-2.67665	-2.72922	4.8143e-05	-2.70094	-4.37585	-2.86512
	pseudo12	9339262	9339472	54	Pav_sc0000869.1_g370.1.mk	disease resistance response protein 206-like	1.97561	-5.30441	-3.36281	0.512805	-1.57065	-1.19286	-4.32958	-3.52668	-1.92697	-1.03117	-2.76339	0.0299141	0.000542359	-0.881758	-3.34365	-1.29082
	pseudo12	2240960	2241344	54	Pav_sc0000800.1_g1320.1.mk	DNA polymerase theta	-1.81116	-4.14274	-3.53091	-1.5003	-4.19421	0.275112	-0.383447	-1.72976	-0.60075	-0.371282	-1.9976	2.12169	6.08979e-05	1.91841	2.01272	3.65043
	pseudo12	3377622	3377932	54	Pav_sc0000817.1_g040.1.br	Unknown	-1.86818	-1.95677	-1.63777	-0.726909	2.54105	-0.0941508	2.10896	1.73248	-0.767186	0.0362639	0.208589	1.47434	0.000460107	3.10952	3.26949	2.53981
	pseudo12	9299430	9299628	54	Pav_sc0000869.1_g280.1.br	Unknown	-0.355627	-0.956164	-2.45411	1.89148	-1.76501	-0.0811847	0.367543	-1.97124	1.48779	2.06227	2.51924	2.83218	0.00184181	1.74228	1.55588	3.52501
	pseudo12	4816134	4816327	54	Pav_sc0000830.1_g420.1.mk	nuclear cap-binding protein subunit 1	0.161291	-2.42312	-1.56164	1.49055	3.4093	1.25758	-1.89734	-1.3373	0.960565	2.13047	1.10144	-0.219217	-8.45457e-13	3.26738	0.667423	2.16749
	pseudo13	9279115	9279352	54	Pav_sc0001006.1_g300.1.br	PH-interacting protein	2.35609	-0.836849	1.92436	-1.05716	-2.11832	-2.46585	1.10617	-3.60291	1.84428	-1.19126	-3.12652	-2.58085	9.27377e-05	-3.40922	-0.701728	-3.71898
	pseudo14	321411	321789	54	Pav_sc0001025.1_g680.1.br	Unknown	-3.71617	-3.06678	-4.6492	-3.08825	-1.51056	-2.06105	-1.18882	-1.69861	-1.50785	-1.85462	2.18363	1.70646	7.21052e-08	1.58974	2.22289	5.10241
	pseudo14	9583544	9583681	54	Pav_sc0001124.1_g290.1.mk	Unknown	-4.41419	-5.7683	-4.26624	-5.91425	-2.22263	-5.61926	1.05138	-5.81941	2.16694	-5.81912	-1.00083	2.22657	7.43605e-09	1.09951	5.81103	5.47059
	pseudo14	759427	759642	54	Pav_sc0001030.1_g210.1.mk	pyruvate kinase, cytosolic isozyme	2.30306	1.36623	0.5267	-1.76538	-2.33186	-1.59193	1.11227	0.47695	-0.227436	-1.13698	-1.64953	-3.41879	0.000104937	-3.44087	-1.02241	-3.36844
	pseudo14	290256	290583	54	Pav_sc0001025.1_g570.1.br	uncharacterized protein LOC103326714	-2.89702	-2.45906	-2.26165	-2.8012	-1.032	-2.24376	-1.75724	-0.520793	-2.47354	0.717893	1.7621	-3.33074	0.00118337	0.685269	1.1606	3.29125
	pseudo14	10870578	10870817	54	Pav_sc0001141.1_g210.1.mk	uncharacterized protein LOC103330837	-2.07806	-4.53901	-3.06461	0.593704	0.957734	1.53693	2.62553	-3.34322	-1.3088	0.799679	-2.21937	1.04451	5.59495e-05	3.99166	4.06259	3.33071
	pseudo15	2309626	2309886	54	Pav_sc0001183.1_g220.1.br	hypothetical protein AmDm5_1575	-1.68249	-3.95413	-1.96127	1.62351	-1.24479	1.84272	2.5534	0.442254	-3.87273	-0.94172	-1.32658	-0.972218	2.72306e-05	3.48583	3.52736	1.17508
	pseudo15	7135238	7135456	54	Pav_sc0001243.1_g450.1.br	Unknown	-1.0409	-3.06993	-4.35081	1.9968	-0.636941	-0.0382327	1.3201	-0.548752	1.84949	-1.11489	1.04116	-0.264878	0.000692486	3.09988	3.37455	2.35735
	pseudo16	9587420	9587704	54	Pav_sc0001422.1_g330.1.mk	hypothetical protein L484_011508	-5.34321	-4.16248	-3.24368	-1.5322	-1.83436	-2.4682	0.704425	-0.839519	-1.51036	-2.22641	-1.93761	0.61464	0.000160132	2.11666	3.77069	3.4305
	pseudo16	4864695	4864859	54	Pav_sc0001341.1_g590.1.mk	protein SCAR2	-1.48111	-1.89866	-1.43702	1.47149	1.95427	1.42101	0.930724	1.11608	-1.7016	2.51995	2.36136	-0.434159	1.53877e-05	3.22742	2.13751	3.54399
	pseudo17	10403465	10403917	54	Pav_sc0001674.1_g050.1.mk	mitochondrial import inner membrane translocase subunit tim16	1.92698	-2.42395	0.0962109	-1.18328	-3.20354	-0.819343	-3.05434	-1.96497	-3.17227	-2.89453	1.83554	-0.680993	0.00036642	-2.18071	-3.3752	-0.22508
	pseudo17	1558679	1558874	54	Pav_sc0001478.1_g350.1.mk	Unknown	1.7039	-0.326588	0.132495	-1.47523	-3.01348	-3.1721	-0.44861	1.14624	-0.316997	-1.5807	-1.62939	-1.06871	7.60658e-05	-3.11532	-0.458518	-2.18318
	pseudo17	16716	16886	54	Pav_sc0001456.1_g040.1.mk	putative disease resistance RPP13-like protein 1	-1.49835	0.520907	1.21171	-2.69401	-2.16756	-3.10713	0.752752	-2.79003	-4.81512	-1.49236	0.688335	0.435948	0.00158798	-3.05719	-1.1381	-0.306328
	pseudo17	8418312	8418548	54	Pav_sc0001613.1_g530.1.mk	transcription factor GTE4	1.01127	-0.285938	1.87866	-4.33262	-2.14126	-2.72245	0.527155	-1.63511	0.83981	1.07597	-2.04115	-1.11735	3.53082e-05	-3.92826	-0.874398	-1.21175
	pseudo18	3660965	3661243	54	Pav_sc0001769.1_g020.1.br	Unknown	-1.07372	-4.27778	-2.05701	-2.43411	1.00343	2.73325	-0.641672	1.99421	0.0473639	-2.99005	-0.260479	-1.791	0.000760547	3.52671	2.88316	0.7043
	pseudo18	2029963	2030101	54	Pav_sc0001724.1_g080.1.mk	uncharacterized protein At1g18480	-0.824985	-0.394497	0.454963	3.93499	0.593556	3.76756	3.48186	-0.525664	2.00819	-0.883615	2.14605	3.66278	1.03198e-12	3.49628	2.55921	2.7094
	pseudo19	1127951	1128167	54	Pav_sc0001963.1_g070.1.br	Unknown	-4.50942	-4.28963	-4.39021	-3.9894	2.7623	1.13993	-3.92209	2.11071	-1.63661	-4.13029	-4.08182	3.04582	5.7267e-06	5.98681	5.04336	5.87464
	pseudo19	2852846	2853170	54	Pav_sc0002009.1_g110.1.mk	polyphenol oxidase, chloroplastic-like	0.89877	-0.113143	-1.21934	-6.02363	-4.44515	-1.80323	-0.093945	-2.50404	-0.542589	-2.43825	-1.96209	1.01061	0.000210354	-3.21003	-0.838583	-0.390132
	pseudo19	2340908	2341111	54	Pav_sc0001991.1_g170.1.mk	putative pentatricopeptide repeat-containing protein At1g13630	-1.48057	-4.76638	-3.51568	-1.66435	-0.390262	-0.402875	1.49616	0.347806	0.37847	-3.15045	-4.78469	1.06053	2.12243e-05	1.92698	3.48255	2.21134
	pseudo2	8980110	8980522	54	Pav_sc0000094.1_g350.1.br	fasciclin-like arabinogalactan protein 12	-5.10566	-2.4712	-2.92415	-1.19055	0.396608	-2.7157	1.81217	-3.41912	0.244054	0.98562	-2.14273	2.36558	0.00530102	2.48273	3.81147	4.43134
	pseudo2	10097241	10097413	54	Pav_sc0000095.1_g1250.1.br	Unknown	-2.43865	-1.90932	-2.7607	1.52551	-3.58376	-2.78634	2.16606	-3.77462	1.78272	-0.517307	2.03113	2.00549	0.000166779	2.37687	3.74155	3.87893
	pseudo2	5359268	5359451	54	Pav_sc0000072.1_g290.1.br	probable LRR receptor-like serine/threonine-protein kinase At3g47570	-3.79316	-3.93472	-1.93964	0.720967	-3.81127	-3.71095	2.15054	1.38004	-3.55489	0.544516	-4.25445	2.25087	0.000108472	2.1731	4.16185	3.97701
	pseudo2	6997558	6997774	54	Pav_sc0000084.1_g800.1.mk	protein ROOT PRIMORDIUM DEFECTIVE 1	-2.1557	-0.946568	1.44111	-0.994696	0.378089	-1.0998	-0.887383	-0.356508	1.53573	-4.60864	-1.79629	-4.83952	0.000189836	-0.608736	0.287401	-3.24885
	pseudo2	6701469	6701579	54	Pav_sc0000084.1_g240.1.br	uncharacterized protein At3g60930, chloroplastic-like	0.454883	-1.27108	-1.91627	2.03444	1.57914	0.278852	-0.945423	-0.981663	0.850318	1.49213	0.913065	3.59042	0.000391137	2.01713	0.464477	3.02977
	pseudo22	89859	90140	54	Pav_sc0003262.1_g010.1.br	Unknown	1.97179	0.702102	-0.138806	-0.7417	-3.91285	-2.84565	-1.41575	-0.485498	-0.221928	-1.06812	-1.64131	-0.607339	0.000989804	-3.00658	-1.73015	-2.15108
	pseudo22	3751738	3751993	54	Pav_sc0003614.1_g060.1.mk	Unknown	-2.47286	-1.85251	-3.78157	0.410766	0.0509778	1.15578	0.554093	-2.40021	-1.99325	0.379347	-1.64218	0.623108	0.00016131	3.11615	1.8493	2.57711
	pseudo22	10529295	10529558	54	Pav_sc0004341.1_g080.1.mk	Unknown	1.55947	-0.0207683	-2.20295	-0.828331	-0.470932	0.536589	-0.541463	0.143368	-1.39794	-4.29964	-1.72892	-5.39317	0.000222276	-0.601579	-0.934857	-3.46346
	pseudo23	8247505	8247757	54	Pav_sc0005752.1_g020.1.mk	probable receptor-like protein kinase At5g39020	-4.49779	-3.5776	-2.95646	-0.786423	-1.2512	-0.217748	-4.08542	-3.78429	-1.38526	-0.870898	0.274717	-1.10911	0.0013997	2.85613	1.00169	3.11164
	pseudo23	7090770	7090931	54	Pav_sc0005533.1_g020.1.mk	salutaridine reductase-like	-2.42961	-4.55753	-3.05378	-0.596531	-1.53201	0.338597	-2.39992	-4.02861	-0.663141	-0.506459	-0.160757	0.557472	6.01858e-05	2.70448	1.33999	3.13906
	pseudo23	872991	873199	54	Pav_sc0004456.1_g340.1.br	Tag=/pseudo	-0.727065	-0.275	-1.47597	2.61421	3.19571	1.59542	1.76602	0.741697	2.26983	2.41445	1.41093	2.43166	0.00036232	3.3543	2.46682	2.90257
	pseudo23	4605949	4606486	54	Pav_sc0005067.1_g010.1.br	uncharacterized protein At1g10890-like	2.39695	2.16026	1.33363	2.74897	-2.87453	-0.876623	1.00661	-2.12332	-3.77853	-0.949094	-1.30439	-2.51446	0.000689457	-0.727377	-2.40668	-3.48086
	pseudo23	10198778	10198952	54	Pav_sc0006091.1_g050.1.mk	uncharacterized protein LOC103336512 isoform X2	-1.00559	-1.07278	-4.45424	1.88313	0.135553	-1.84085	-2.00825	-1.34987	0.800429	-1.28385	1.20329	2.81851	2.13998e-08	2.31369	1.22521	3.26074
	pseudo24	7317974	7318077	54	Pav_sc0008178.1_g060.1.mk	histone-lysine N-methyltransferase, H3 lysine-9 specific SUVH1-like	-5.16189	-6.00191	-5.95234	1.23854	1.53848	0.349425	-0.321849	-5.61833	0.0356961	-6.16332	2.24998	-6.15681	-4.29619e-13	6.7754	4.95041	6.32487
	pseudo24	4399053	4399238	54	Pav_sc0007248.1_g080.1.br	hypothetical protein PRUPE_ppa024192mg	-1.07865	-1.98103	-2.87519	-0.286007	1.53454	0.618769	0.599064	1.00413	1.48456	1.73434	0.685326	2.00371	0.000376316	2.6055	2.87209	3.37363
	pseudo24	8195643	8195976	54	Pav_sc0008518.1_g070.1.mk	R3H domain-containing protein 2-like	-1.57785	-2.27266	-2.17269	1.4917	0.235712	2.11053	0.533429	0.22447	-0.801981	0.316648	0.86171	-0.603985	0.0020615	3.44341	2.0621	2.28439
	pseudo3	10401734	10401958	54	Pav_sc0000143.1_g440.1.mk	eukaryotic translation initiation factor 5B-like	-3.08288	-1.04835	-4.50368	0.943977	0.867618	1.3887	0.434333	-1.27646	1.23837	0.404159	-0.339649	0.685045	8.99408e-10	3.30183	2.67507	2.52704
	pseudo3	8436185	8436483	54	Pav_sc0000131.1_g240.1.mk Pav_sc0000131.1_g250.1.mk	monoacylglycerol lipase ABHD6-like serine/threonine-protein kinase At5g01020	-3.02799	-5.52045	-2.97498	1.98731	-5.18577	-2.3133	1.35536	0.322111	-1.90845	-0.615622	1.23046	-0.441976	0.000425704	3.94881	3.90745	3.78179
	pseudo3	6012944	6013070	54	Pav_sc0000123.1_g260.1.br	Unknown	-0.621097	-1.88791	-1.95577	1.29426	2.69691	0.291983	-0.92754	-0.331057	-2.15315	-0.0295952	0.302608	-0.588502	4.92657e-06	3.10843	0.391568	1.28858
	pseudo3	6635490	6635902	54	Pav_sc0000127.1_g120.1.br	Unknown	-4.27305	-2.87099	-3.33016	-1.26855	-2.51956	0.790753	0.734607	-2.12862	0.932403	0.601714	-0.576295	-5.0793	8.31048e-05	3.01041	3.72303	2.94574
	pseudo3	7897156	7897337	54	Pav_sc0000130.1_g210.1.br	Unknown	-1.07214	-5.05901	-4.33105	1.90874	2.64638	2.82849	1.91778	2.65143	1.49277	1.35277	0.640993	-0.345465	-2.07784e-10	4.94621	4.53524	3.14159
	pseudo4	91500	91729	54	Pav_sc0000146.1_g150.1.mk	adenylate isopentenyltransferase 3, chloroplastic	-1.68963	-0.390537	-4.28003	0.64125	-0.213848	1.84776	1.96856	0.662556	0.872005	1.35988	2.33935	0.847725	4.38229e-08	2.42102	2.70414	3.06775
	pseudo4	7172417	7172743	54	Pav_sc0000200.1_g250.1.br Pav_sc0000200.1_g260.1.br	hypothetical protein CICLE_v10018193mg uncharacterized protein LOC103963587	-2.18263	-2.43437	-2.79824	0.801665	0.418034	0.57224	0.73617	-0.310339	0.891161	-0.679037	-2.12864	-0.632584	0.00412033	3.05596	2.97834	1.44832
	pseudo4	9867585	9867808	54	Pav_sc0000212.1_g370.1.mk	NADPH:adrenodoxin oxidoreductase, mitochondrial	0.845953	-0.146784	-6.01386	-1.55087	-2.3885	-4.61158	1.9685	-0.98551	-2.61486	-4.20412	-4.0019	-4.71757	1.79844e-07	-2.2445	0.754363	-4.13423
	pseudo5	8560885	8561075	54	Pav_sc0000268.1_g560.1.br	uncharacterized protein LOC103333099	3.15491	2.09312	1.89752	-3.01949	0.0685242	-3.50827	0.312751	2.6196	0.484187	0.470225	-0.948948	-0.708382	1.3202e-06	-3.74564	-0.943569	-2.74813
	pseudo6	5005606	5005810	54	Pav_sc0000348.1_g360.1.mk	delta(7)-sterol-C5(6)-desaturase-like	0.871478	-2.78066	-0.201353	0.901256	-0.746659	1.28759	1.97735	-2.43793	-0.556989	-2.90537	-3.22354	-3.44211	0.000478854	0.785889	0.755296	-3.09673
	pseudo6	8465112	8465553	54	Pav_sc0000359.1_g710.1.mk	homogentisate phytyltransferase 1, chloroplastic isoform X1	-3.93631	-5.13837	-2.88629	-0.320146	1.70042	-1.20323	1.15543	-3.25897	-0.210659	-1.85623	-2.9319	1.05304	0.000420589	4.292	3.80313	3.43839
	pseudo6	2988640	2989025	54	Pav_sc0000323.1_g950.1.br	Unknown	-3.09304	-4.84147	-4.27673	1.17254	-1.04272	-3.29828	-0.477952	-4.12336	-3.25231	-0.489888	-1.60525	-3.76969	0.000468341	3.80221	2.11183	2.45158
	pseudo6	665359	665498	54	Pav_sc0000304.1_g110.1.mk	protease inhibitor/seed storage/lipid transfer family protein	2.87662	0.832407	-0.128608	-1.03066	1.3893	-1.24324	-1.68317	-1.33615	-1.21751	1.87194	-3.3926	-0.484726	9.66819e-06	-1.50739	-3.14177	-1.16733
	pseudo6	9859800	9860377	54	Pav_sc0000370.1_g610.1.br	Tag=/pseudo	-1.0409	-4.00186	-2.3635	-0.582075	-0.48174	-0.464782	-1.26061	-4.38793	-1.46866	2.53111	-0.942008	-0.347108	0.00010898	1.50538	0.154027	3.25417
	pseudo7	1608289	1608438	54	Pav_sc0000383.1_g210.1.mk	AP-3 complex subunit delta	-0.918875	-4.52654	-5.03794	3.15405	-3.86825	0.599783	-1.20479	-3.96868	0.0203374	-0.678868	0.334948	2.26095	6.83556e-09	4.12069	1.32673	3.47002
	pseudo7	10060559	10060754	54	Pav_sc0000464.1_g1090.1.mk	GDP-mannose transporter GONST3-like	-2.40341	-5.45406	-3.93595	0.252206	-5.40637	1.43515	0.163703	-0.39329	-3.69059	2.36346	0.81092	0.843375	1.64549e-09	3.82155	2.82129	4.97129
	pseudo7	2720007	2720416	54	Pav_sc0000389.1_g920.1.br	hypothetical protein PRUPE_ppb022083mg	-2.32758	-3.5097	-2.96118	0.32929	1.4053	0.534101	1.31014	-0.581877	0.162639	-2.13502	0.0389654	0.8556	8.07268e-06	3.68774	3.3606	2.88302
	pseudo7	2331299	2331617	54	Pav_sc0000388.1_g050.1.br	Unknown	-1.18162	-1.88468	2.30652	-3.65088	1.36272	-2.11225	0.956267	-3.98561	-2.52119	-3.12954	-5.28427	-4.02778	0.000137161	-0.97306	-1.37769	-4.81348
	pseudo7	1233734	1234113	54	Pav_sc0000379.1_g010.1.mk	thebaine 6-O-demethylase-like	-1.20446	-3.89706	-4.18868	0.539072	-1.78368	2.56738	0.449514	-2.52183	-0.150899	-2.17247	-3.47297	0.00198549	0.000336001	3.7865	2.13423	1.24028
	pseudo8	10123773	10124057	54	Pav_sc0000544.1_g450.1.mk	60S ribosomal protein L30-like	-2.37364	-1.52385	-3.62582	-1.96473	1.30402	-1.80071	0.415214	-3.21597	-2.78479	2.1684	-0.819205	1.82126	0.000436619	2.27656	1.35126	3.7893
	pseudo8	5774579	5774731	54	Pav_sc0000500.1_g160.1.mk	DNA topoisomerase 1-like, partial	0.0497827	-0.133302	-0.514181	3.64177	2.96523	-0.12032	1.73948	1.93411	-2.09656	-0.728566	1.25094	2.20208	0.000136543	3.00239	1.48205	1.51874
	pseudo8	9974993	9975335	54	Pav_sc0000544.1_g200.1.mk	DNA-directed RNA polymerases II, IV and V subunit 11	-1.96564	-4.05755	-0.890692	-3.08229	-1.39975	0.361063	-2.55396	1.65503	-2.5225	1.15806	0.376305	1.78497	0.000909088	1.05831	2.02999	3.02761
	pseudo8	3866591	3866870	54	Pav_sc0000491.1_g320.1.mk	flowering time control protein FCA	-0.46171	0.198504	-1.80147	0.119429	-2.89913	-1.40239	-3.84524	-6.16044	-5.34776	-0.121659	-4.43824	-0.0914779	6.07554e-06	-0.434513	-4.32075	-0.18248
	pseudo8	5194622	5194874	54	Pav_sc0000496.1_g200.1.br	mavicyanin-like	2.51392	-5.8229	-0.150068	1.54114	0.980506	-5.55953	-6.33331	-5.31772	-0.788116	-1.60582	-4.14735	2.24884	4.09066e-06	-0.435	-3.42679	-0.367937
	pseudo8	9897285	9897598	54	Pav_sc0000544.1_g030.1.mk	uncharacterized protein LOC103335498	-1.58231	-2.94971	-1.64702	0.978999	-4.5778	0.462426	-1.36884	-2.6546	-4.29846	2.54768	-0.945801	-2.01996	6.17081e-05	2.11514	-0.39109	3.07873
	pseudo9	2424774	2424964	54	Pav_sc0000555.1_g080.1.mk	uncharacterized protein LOC103322110 isoform X1	-1.8888	-5.03899	-4.80942	-3.45706	-1.74655	-1.8671	-0.307308	-3.52668	0.534304	-0.823028	-4.02042	2.59768	1.97298e-05	0.980493	2.80144	4.31284
	pseudo9	10689078	10689338	54	Pav_sc0000598.1_g600.1.mk	uncharacterized protein LOC103337973	-2.34922	-2.40958	-3.10986	-1.63672	0.557517	3.28087	1.5845	0.163294	1.09754	0.687368	0.042082	2.11017	0.000871999	4.52431	3.64502	3.79768
	pseudo1	5357050	5357489	53	Pav_sc0000028.1_g080.1.mk	hypothetical protein EUGRSUZ_H04055	-0.482743	-4.10295	-2.08176	2.18534	-0.434129	1.70771	0.600319	-4.52528	-1.2781	-0.857535	-1.31001	1.38169	0.00143483	3.08234	0.965117	1.81785
	pseudo1	7798637	7799235	53	Pav_sc0000036.1_g140.1.br	hypothetical protein OsJ_31232	-5.5034	-5.82628	-4.44443	-1.90826	-0.959231	-0.416814	-1.10385	-1.62215	-4.09234	-1.58581	-0.449665	-3.00505	0.000830269	4.15962	3.30967	3.79712
	pseudo11	10223040	10223525	53	Pav_sc0000766.1_g080.1.mk	myb-related protein 306	1.82515	1.66696	1.49338	0.0844594	-2.53121	0.482574	2.23607	0.611492	-1.37453	-1.29516	-2.01907	-1.55641	0.000384802	-1.85779	-0.525299	-3.26152
	pseudo11	2554091	2554292	53	Pav_sc0000702.1_g480.1.mk	uncharacterized protein LOC103343554	2.92703	-2.25308	0.618105	-0.577798	-1.37773	0.17291	-0.464826	-0.0402192	-3.40269	-4.2286	-3.21484	-1.65914	0.0001586	-2.09923	-2.38371	-4.29088
	pseudo12	4261106	4261295	53	Pav_sc0000829.1_g040.1.br	Unknown	-3.43826	-2.24953	-2.2976	-1.99477	-1.43124	1.41298	0.262596	-1.22936	-0.482773	-2.47069	1.64773	1.68446	0.000368333	2.69865	2.21053	3.68959
	pseudo12	7572070	7572216	53	Pav_sc0000852.1_g820.1.mk	protein DCL, chloroplastic	3.02237	-1.13336	2.13082	1.11322	-0.215726	2.74112	1.04285	-0.304289	0.849511	-1.84623	-0.905273	-0.641313	0.000254176	-0.416534	-1.472	-3.15684
	pseudo12	7044274	7044541	53	Pav_sc0000851.1_g040.1.br	uncharacterized protein LOC103963587	-0.93206	2.13526	-3.47217	0.941978	-1.92003	0.449075	-1.71921	-2.73289	-3.11969	-1.17373	1.48816	-0.278045	0.000382824	-0.496006	-3.13708	-0.297867
	pseudo13	10065360	10065574	53	Pav_sc0001015.1_g170.1.br	Unknown	-1.49185	-3.9109	-3.67501	-0.790266	3.9227	-0.81553	1.16645	-0.568459	-1.01713	2.06965	-4.35992	-1.65252	2.84549e-07	5.02688	2.7701	3.18954
	pseudo14	3140543	3140920	53	Pav_sc0001059.1_g470.1.mk Pav_sc0001059.1_g480.1.mk	hypothetical protein CISIN_1g045338mg hypothetical protein PRUPE_ppa005007mg	-2.44328	-2.67444	-2.20964	-3.77746	1.58088	-2.33499	-3.36459	1.11734	1.30862	1.59009	-0.0117356	0.191916	0.000160295	2.55108	3.09102	3.20817
	pseudo14	7946998	7947149	53	Pav_sc0001107.1_g320.1.br	Unknown	-1.71622	-1.30211	-2.78072	-0.125147	-2.6179	2.35136	-0.418974	-1.86037	-1.07185	2.29177	1.73428	2.68632	0.00148506	2.85361	0.809403	4.09919
	pseudo14	1228641	1228995	53	Pav_sc0001037.1_g050.1.mk	TMV resistance protein N-like	-1.43598	-2.88296	-2.61995	-2.2156	0.550035	-0.575065	-0.868802	-1.92557	-0.185819	-0.843064	0.792794	1.97866	0.000204823	1.81552	1.33946	3.22194
	pseudo14	3818620	3818808	53	Pav_sc0001073.1_g260.1.mk	transcription factor CPC-like	-3.06378	-2.64403	-6.00197	-2.26258	-2.58794	-0.582472	1.98256	-3.17724	-0.77197	-0.260109	-0.964745	0.548446	1.49695e-06	1.82044	3.97698	3.25086
	pseudo14	5120080	5120436	53	Pav_sc0001081.1_g180.1.br	uncharacterized protein LOC103342996	-2.96545	-2.53935	-2.01581	1.53894	0.371161	0.814144	1.20454	-0.269982	1.08066	1.34322	-1.60483	-1.77491	0.00204115	3.44422	3.26157	2.52861
	pseudo15	7620732	7620937	53	Pav_sc0001250.1_g120.1.br Pav_sc0001251.1_g010.1.mk	expansin-A10 F-box/WD-40 repeat-containing protein At5g21040	-2.15752	-5.2414	-3.33368	0.328297	1.54786	0.0985605	2.0551	-1.54549	-1.43885	0.206767	-0.00520821	-2.76199	2.40308e-05	3.90788	3.79862	2.71587
	pseudo15	7742408	7742588	53	Pav_sc0001251.1_g220.1.mk	Unknown	-0.0891131	-2.18493	-2.46378	-0.244831	0.646753	0.912299	-0.123325	2.59251	1.91197	2.79119	0.979155	2.11376	0.000296376	1.67789	2.99763	3.30118
	pseudo15	7829057	7829331	53	Pav_sc0001251.1_g430.1.br	Unknown	0.146216	-0.335819	-0.308315	-3.49911	-4.74945	-4.00221	1.42653	-2.33648	0.429082	-1.02857	1.23031	1.35984	6.53559e-07	-3.84748	0.644995	0.99727
	pseudo15	10308745	10309046	53	Pav_sc0001280.1_g490.1.mk Pav_sc0001280.1_g500.1.mk	oxysterol-binding protein-related protein 3A ribonuclease II, chloroplastic/mitochondrial	1.78617	0.429776	-1.99491	1.08657	-4.24035	-1.98118	-3.42811	-5.77916	-3.24492	-3.46755	-3.62301	-3.75839	9.60362e-05	-1.05451	-4.54231	-4.36184
	pseudo15	5412776	5412950	53	Pav_sc0001217.1_g040.1.mk	thebaine 6-O-demethylase-like	1.79724	0.561206	1.86883	-0.750217	0.449036	1.24429	-1.11971	-2.21544	-3.04098	1.72192	-1.61048	2.52289	0.00050369	-0.99099	-3.43224	0.123687
	pseudo15	4325741	4326023	53	Pav_sc0001196.1_g2280.1.br	uncharacterized protein LOC103333575	1.8034	-0.202294	3.41595	-1.00835	-1.0976	-1.35538	-1.76043	0.580814	-0.959114	-2.17419	0.247363	-0.485811	0.00123242	-3.47152	-2.70516	-2.82417
	pseudo16	1535373	1535631	53	Pav_sc0001308.1_g270.1.mk	endoplasmic reticulum-Golgi intermediate compartment protein 3-like	-1.79514	-2.9409	-4.60018	0.909493	-1.69188	0.224111	-0.583561	-2.66021	0.852259	1.58786	-2.61559	1.38012	1.25805e-05	2.86828	2.51707	3.65065
	pseudo16	3421805	3421985	53	Pav_sc0001323.1_g1140.1.br	protein FAR1-RELATED SEQUENCE 5-like, partial	-1.23876	-3.87006	-1.84186	0.300436	0.677359	1.57607	2.45853	2.99412	-3.55287	-1.39459	-0.443266	-3.09828	4.63027e-05	2.91414	4.13517	0.676719
	pseudo17	6514879	6515017	53	Pav_sc0001557.1_g180.1.mk	COP9 signalosome complex subunit 7-like isoform X2	-0.377607	-0.316666	-3.61793	2.82929	3.37356	-1.32695	1.93585	-2.55155	-2.43458	-1.28555	1.50836	1.52382	1.99548e-07	3.43345	1.33802	1.88999
	pseudo17	10482709	10482907	53	Pav_sc0001685.1_g050.1.br	Unknown	-2.57005	-3.46944	-4.35792	-3.19194	-0.142749	0.773673	0.990659	-4.26989	0.12996	0.331437	-0.518678	-2.33557	3.2674e-05	3.14776	3.34922	2.80887
	pseudo18	5027869	5028013	53	Pav_sc0001797.1_g310.1.br	mechanosensitive ion channel protein 1, mitochondrial-like	0.774298	0.0507718	2.86271	2.43422	0.719635	1.68299	1.85018	-0.649086	-0.396764	-1.01673	-1.56866	-1.44088	0.00499891	0.0344914	-1.0021	-3.06214
	pseudo18	7947030	7947143	53	Pav_sc0001859.1_g180.1.br	Tag=/pseudo	-2.37285	-2.93332	-3.21726	0.890167	-1.32686	1.39985	1.37084	-4.44906	-2.1445	0.283658	-2.52125	-1.22349	0.00017224	3.50263	2.72765	2.07628
	pseudo18	327950	328179	53	Pav_sc0001700.1_g170.1.br	uncharacterized protein LOC103322337	0.720889	0.154768	2.12709	-4.18763	-1.1736	-1.75331	-0.0542256	-1.18012	1.21338	-0.884006	2.132	1.50194	0.000259619	-3.16517	-0.937302	0.121702
	pseudo18	9582025	9582398	53	Pav_sc0001879.1_g040.1.br	uncharacterized protein LOC103435713	-3.37345	-5.82628	-5.02971	0.861451	-3.67267	-0.417286	-0.960739	-2.5982	-1.34277	-1.09743	1.45718	-5.28284	0.000113873	4.19135	2.89049	4.484
	pseudo19	3731065	3731387	53	Pav_sc0002052.1_g060.1.mk	ankyrin repeat-containing protein At3g12360-like	-1.95567	-3.99925	-1.69493	-2.47975	-0.518604	2.25791	0.541901	1.73073	-0.212327	-1.34836	-2.89497	0.0949439	0.000230633	3.16928	3.16359	1.34214
	pseudo19	4992463	4992753	53	Pav_sc0002100.1_g140.1.br	Unknown	-4.09213	-1.60299	2.39473	0.834898	-0.482781	-0.0691294	-0.702612	-1.0879	-2.12739	-4.15324	-4.12419	-3.32979	0.000851456	-0.709728	-2.10367	-4.72844
	pseudo19	1789910	1790042	53	Pav_sc0001974.1_g320.1.mk	UBP1-associated protein 2C-like	-1.59708	-2.88001	-2.1193	2.55996	-2.17706	1.61743	-4.20438	-3.35044	-0.835298	-1.99128	-1.95981	2.63352	0.000378364	3.7212	0.0331899	3.26888
	pseudo2	3544089	3544379	53	Pav_sc0000065.1_g760.1.br	serine/threonine-protein phosphatase 7 long form homolog	-2.39344	-1.09213	-3.14737	2.0999	1.37715	1.95752	2.25006	1.03631	1.20055	0.539469	0.734108	0.760924	0.000681346	3.80156	3.55971	2.6393
	pseudo20	306076	306394	53	Pav_sc0002296.1_g100.1.br	Unknown	-5.156	-2.10471	-5.70933	-3.46537	-0.512807	-1.5934	-1.74685	0.172772	1.46839	-1.40497	-3.26495	-1.18531	1.42188e-08	2.00535	3.90601	1.72015
	pseudo20	455733	455917	53	Pav_sc0002304.1_g080.1.br	Unknown	-1.91225	-3.24177	-1.82396	1.01259	0.325304	1.21969	1.92307	-3.61562	0.546418	-2.25098	0.362404	0.656046	0.00384848	3.09827	3.0283	2.2319
	pseudo21	8048720	8049016	53	Pav_sc0003098.1_g020.1.mk	TMV resistance protein N-like	0.118494	0.950362	-0.382368	-2.3803	-4.13796	-2.92365	0.699347	-1.90815	-1.86623	-2.7471	-1.42456	0.0899503	0.000523736	-3.31376	-0.806316	-1.25512
	pseudo21	8029421	8029732	53	Pav_sc0003094.1_g110.1.br	uncharacterized protein LOC103337631	0.693339	-0.972682	-0.0256038	-3.62431	-1.11326	-0.794035	-3.83018	-3.07187	-3.87067	-1.88595	-0.0522243	-3.76424	0.0005642	-1.47286	-3.59327	-1.24841
	pseudo22	3049730	3049911	53	Pav_sc0003562.1_g510.1.br	fibrous sheath CABYR-binding protein-like	-0.340125	-1.90906	-0.0427089	-1.31878	0.674435	1.94727	3.24119	1.76359	2.30103	-0.0480316	1.28515	2.60416	0.00412889	1.52985	3.13273	2.22621
	pseudo22	1853543	1853773	53	Pav_sc0003468.1_g110.1.mk	probable carboxylesterase 15	0.336652	2.43385	-2.02321	-2.45751	-2.08479	-3.04742	-3.41203	0.641475	-3.19936	-2.32513	-5.07269	-3.92965	5.90292e-06	-3.68145	-1.97132	-4.55087
	pseudo22	7460819	7460986	53	Pav_sc0003921.1_g010.1.br	probable mannitol dehydrogenase	-0.772522	0.179752	2.46772	-1.29441	-1.81447	0.00340652	0.118792	0.528111	-1.41268	-3.16001	-3.01646	-0.741279	0.00200321	-2.09718	-1.32016	-3.12039
	pseudo22	9556039	9556270	53	Pav_sc0004218.1_g020.1.br	serine/threonine-protein phosphatase 7 long form homolog	-4.42798	-4.79536	-4.6333	2.22843	1.48487	1.19434	-2.42545	-4.28866	3.36237	0.529833	-4.82489	1.98079	1.10522e-05	6.31494	6.42134	5.46598
	pseudo23	8282262	8282538	53	Pav_sc0005755.1_g030.1.br	receptor-like protein kinase FERONIA	-1.37056	-1.88664	-1.82223	-1.28609	-0.544348	-0.0632925	1.63989	1.99786	-0.670345	-2.43173	-2.80835	0.994811	0.000270557	1.12695	3.04145	1.30403
	pseudo24	4409378	4409798	53	Pav_sc0007251.1_g010.1.br	pentatricopeptide repeat-containing protein At1g66345, mitochondrial	-1.11278	0.766085	0.154137	-0.836129	0.241917	-0.667393	-1.99561	-2.43622	-3.18049	-1.67034	-4.19646	-4.93315	0.00017058	-0.465532	-2.58533	-3.02854
	pseudo24	6950023	6950350	53	Pav_sc0008063.1_g010.1.br	uncharacterized protein LOC103341686	1.72238	2.39459	1.33555	0.170968	-1.53462	-0.827225	0.418564	0.238776	0.581833	-1.46951	-2.77348	-2.93278	1.47054e-05	-2.44538	-1.46532	-4.11777
	pseudo25	9048429	9048780	53	Pav_co4084101.1_g010.1.br	Unknown	-0.758617	-0.601504	-0.637087	-1.32494	-2.21686	-2.82516	-3.81914	-5.24392	-4.91769	-1.35497	-3.17061	-2.27114	0.000120799	-1.32551	-3.86064	-1.41658
	pseudo25	3994723	3995071	53	Pav_sc0011972.1_g020.1.br	Unknown	-3.2922	-1.72367	-3.72834	2.40425	0.416601	1.48211	1.61926	2.40631	-2.33504	-0.0830052	-4.78735	0.624805	8.6034e-05	4.29399	4.15752	2.39271
	pseudo25	202766	203446	53	Pav_sc0009872.1_g010.1.br	TMV resistance protein N-like	2.15887	-1.11651	1.40184	-0.929835	0.546889	-3.83382	-1.74307	-0.39666	-0.0521035	-3.65546	-2.85082	-1.46639	0.00536644	-1.88032	-1.90374	-3.70636
	pseudo3	10011182	10011359	53	Pav_sc0000138.1_g1190.1.mk Pav_sc0000138.1_g1200.1.mk	hypothetical protein PRUPE_ppa006627mg protein ABIL2	-3.94963	-0.931095	-1.90408	1.46291	-3.29365	0.951182	3.808	1.38452	-3.85024	-3.48332	0.762781	1.12875	0.000957905	2.48435	4.2843	2.21388
	pseudo3	4846894	4847142	53	Pav_sc0000113.1_g490.1.mk	RNA polymerase I-specific transcription initiation factor RRN3-like	-4.40069	-3.18014	-3.21104	0.647752	-1.48896	-1.93527	-1.69808	-0.708938	-5.98358	1.51281	-5.14033	-1.8367	0.000314386	3.03963	1.81657	3.57317
	pseudo3	9859953	9860105	53	Pav_sc0000138.1_g930.1.mk Pav_sc0000138.1_g940.1.mk	yellow stripe-like protein metal-nicotianamine transporter YSL3	0.788361	-0.588795	2.85008	1.49953	2.88247	2.49788	2.09065	-1.88472	0.164828	-2.91129	-1.74764	-0.437381	0.000386615	0.723033	-0.764829	-3.03789
	pseudo4	8067975	8068147	53	Pav_sc0000205.1_g220.1.br	auxilin-related protein 1-like	2.92402	2.80091	1.85173	1.10484	0.154141	-0.804855	0.622321	0.748102	-0.138495	-1.9303	-0.174905	0.00234803	0.000104582	-2.24373	-2.13807	-3.07908
	pseudo4	9614175	9614362	53	Pav_sc0000209.1_g170.1.br	hypothetical protein	-1.34119	-2.78219	-3.53297	1.0228	-3.48783	-1.16302	-2.75973	2.28878	1.75669	3.33716	0.467099	0.249266	0.000118682	2.03511	3.74738	4.33886
	pseudo4	4189905	4190135	53	Pav_sc0000175.1_g170.1.mk	NADH dehydrogenase	2.03321	1.14279	1.12773	-0.929675	2.36144	0.964949	-0.846082	-1.80375	-0.173259	-3.94302	-3.45275	-2.67743	2.71738e-05	-0.156152	-2.29474	-4.76244
	pseudo4	663892	664334	53	Pav_sc0000148.1_g490.1.mk	NADP-dependent D-sorbitol-6-phosphate dehydrogenase-like	-1.3066	-4.35465	-3.74594	1.14953	0.997848	-2.02867	0.138433	-0.522885	-0.976753	0.560067	-0.0162452	0.294884	0.000516903	3.07946	2.12689	2.80584
	pseudo5	2686910	2687070	53	Pav_sc0000229.1_g240.1.br	hypothetical protein PRUPE_ppb024739mg, partial	1.27843	0.209366	2.06623	-3.53648	-0.846453	-1.73469	0.34092	0.520021	3.20455	2.46246	-0.301251	2.52622	1.42603e-05	-3.04285	0.617324	0.637106
	pseudo6	5164042	5164353	53	Pav_sc0000348.1_g630.1.mk	B3 domain-containing protein REM19-like	-3.32073	-1.51816	-4.30754	-4.01078	-2.38181	-1.27264	1.22644	-0.816512	1.37726	0.091572	-2.48183	0.811516	2.91057e-05	0.41832	3.46168	2.58559
	pseudo6	5714569	5714767	53	Pav_sc0000350.1_g080.1.br	beta-glucosidase 24-like	-0.145348	1.74823	0.418897	-3.17531	-3.81542	-2.65373	2.14941	2.44772	-2.02026	-0.5115	-0.988353	2.45855	0.000140573	-4.03926	0.856209	0.259068
	pseudo6	8368864	8369126	53	Pav_sc0000359.1_g570.1.mk	Unknown	-3.85751	-2.80755	-2.09708	0.615773	-2.47947	-0.130589	-1.52563	1.77705	-0.482656	0.610062	-2.25156	-1.43007	0.000923725	2.55871	3.33311	2.2418
	pseudo6	1541321	1541818	53	Pav_sc0000311.1_g470.1.br	patatin-like protein 1	1.60417	-3.36406	-1.40482	-0.873696	-2.404	0.590735	-2.67399	-4.69158	-3.00438	-2.13325	-3.5503	-1.06129	0.000592076	-0.64957	-3.45732	-2.14902
	pseudo6	3815071	3815303	53	Pav_sc0000329.1_g080.1.br Pav_sc0000329.1_g090.1.br	predicted protein Unknown	-2.14003	-4.35465	-1.65048	0.902802	1.60462	0.0120468	1.50653	-0.416301	-4.33277	-0.722253	1.64739	2.0889	6.9391e-05	3.31617	2.61479	3.74951
	pseudo6	664967	665134	53	Pav_sc0000304.1_g110.1.mk	protease inhibitor/seed storage/lipid transfer family protein	-0.117931	-1.69614	-3.74113	0.907279	-1.48585	-0.124992	1.91316	2.3326	0.8837	0.759586	-0.332913	-0.00174533	9.66819e-06	1.2712	3.02864	1.41752
	pseudo7	4740742	4740993	53	Pav_sc0000405.1_g770.1.br	calphotin-like	-0.186978	1.57477	0.950174	-1.93416	-6.11092	0.771276	-4.12771	1.45309	-1.434	-4.82977	-2.89486	-3.33564	0.000114892	-1.54579	-0.871107	-4.42953
	pseudo7	6653662	6654033	53	Pav_sc0000417.1_g010.1.mk	DNA-directed RNA polymerase III subunit RPC8-like	-3.66173	-4.11895	-0.732106	0.21241	2.32908	0.759666	-0.412418	-2.93051	-1.13365	-2.97771	-1.39816	0.0235349	0.00142697	3.41471	0.85754	1.04388
	pseudo7	2038836	2039222	53	Pav_sc0000383.1_g1060.1.mk	Unknown	-4.14762	-5.31687	-1.83755	-0.813569	-0.772212	0.210006	1.26479	-1.82608	-1.36472	-0.931022	-1.2832	-1.05047	0.00042138	2.67734	3.08848	1.97275
	pseudo7	7536719	7536889	53	Pav_sc0000428.1_g480.1.mk	probable GPI-anchored adhesin-like protein PGA55	-5.56853	-3.97507	-5.69592	-6.10227	-5.69108	-4.78352	1.64681	-6.05378	-0.599837	0.303212	2.62897	2.67738	8.11853e-14	-0.565948	5.19439	7.05434
	pseudo7	9124136	9124336	53	Pav_sc0000453.1_g060.1.mk	protein trichome birefringence-like 14	-4.27756	-4.91026	-3.14974	-3.98184	-1.97013	2.63784	-2.66079	-2.98106	2.57072	-1.65262	-3.42688	2.52188	0.000167942	5.04996	4.97839	4.96173
	pseudo7	1427065	1427199	53	Pav_sc0000381.1_g180.1.mk	purple acid phosphatase 15	-0.970056	-2.88929	-1.9901	-1.45239	-3.12087	0.942875	2.86775	-3.36029	0.999351	0.284003	-3.58528	-2.26793	1.09246e-06	1.42121	3.38854	0.74966
	pseudo7	5674732	5675140	53	Pav_sc0000410.1_g830.1.mk	uncharacterized protein LOC103321113	-3.75144	-2.61413	-5.70933	0.968677	1.50574	2.80164	0.021047	-3.11569	-2.11658	0.285107	-0.528119	0.149984	4.21053e-05	5.5188	2.40618	3.55714
	pseudo8	9025975	9026523	53	Pav_sc0000535.1_g320.1.mk	dihydrolipoyllysine-residue acetyltransferase component of pyruvate dehydrogenase complex, mitochondrial	2.26232	-3.29642	-0.42954	-4.43212	-2.09274	1.68577	-3.13756	-3.39601	-3.12388	-0.163785	-3.28569	0.886874	0.00045581	-0.689699	-4.12505	-0.988062
	pseudo8	8611023	8611200	53	Pav_sc0000529.1_g050.1.br	Unknown	-2.36576	-1.82864	-4.05745	0.240001	2.05104	0.494432	1.33013	-2.73247	-1.60515	-0.202742	-1.09044	-2.78281	2.49882e-05	3.65218	2.48255	1.47008
	pseudo8	260624	260816	53	Pav_sc0000467.1_g320.1.br	unknown	-3.24517	-3.04981	-0.799183	-2.48902	1.59996	-1.42258	1.56918	-4.46906	-1.37071	2.10381	-0.940347	2.04463	7.62346e-05	2.16129	2.08551	3.48142
	pseudo9	9401140	9401535	53	Pav_sc0000592.1_g180.1.br Pav_sc0000592.1_g190.1.br	ankyrin-1-like Unknown	1.57652	1.35324	0.862246	0.733298	0.526723	-0.412661	-0.936972	1.70682	-0.75928	-3.28548	-0.827707	-2.2601	0.00105373	-0.932293	-0.748653	-3.07184
	pseudo9	1321899	1322203	53	Pav_sc0000554.1_g250.1.mk	protein NEDD1	-2.58429	-3.4317	-4.9432	-0.506887	-3.62698	-0.220902	1.56384	1.70202	-3.05315	-1.76425	-0.728289	0.488636	0.000934514	2.49242	4.43865	2.97868
	pseudo9	3584219	3584471	53	Pav_sc0000558.1_g260.1.mk	transcription factor bHLH62	-3.68312	-2.55599	-2.90576	0.716812	-5.26673	0.774011	1.37833	-1.36505	-1.23739	0.189318	-3.06799	-2.97492	0.00162159	3.14768	3.16149	1.86247
	pseudo9	9685850	9686042	53	Pav_sc0000595.1_g190.1.br	uncharacterized protein LOC103330883	-2.54557	-4.00639	-4.35869	-2.08047	0.549449	0.102873	1.3886	-1.52947	-2.52682	-0.0811381	-0.966502	-0.979741	0.000205809	3.29688	3.47489	2.79886
	pseudo9	1992087	1992287	53	Pav_sc0000554.1_g1550.1.mk	zinc finger protein ZAT12-like	-1.21269	-2.0449	-3.60905	0.146633	2.94297	-0.000916405	2.06436	2.33627	1.30976	0.916832	0.47745	0.101875	9.06017e-05	3.69624	3.95386	2.52616
	pseudo1	9816461	9816845	52	Pav_sc0000044.1_g520.1.mk	DNA-(apurinic or apyrimidinic site) lyase 2	-2.82726	-2.23536	-3.94653	0.147663	-0.0661571	0.932453	0.818688	-4.24347	-3.03696	-1.6469	-3.54051	-0.310272	2.48542e-05	3.24766	2.21287	1.53508
	pseudo1	3648976	3649244	52	Pav_sc0000017.1_g1380.1.mk	histone-lysine N-methyltransferase ATX2-like	-4.20842	-5.12805	-3.86983	2.67052	-0.641733	-0.032239	1.47406	0.752889	-1.63476	-0.565201	1.22607	-3.37696	1.9774e-06	5.72389	4.9851	4.36408
	pseudo1	2795383	2795796	52	Pav_sc0000016.1_g010.1.br	probable E3 ubiquitin-protein ligase HERC2	2.65614	2.51989	0.682405	-0.0966301	-2.66611	1.23155	1.35494	1.63596	0.336135	-1.03216	-4.48329	-1.36534	1.97488e-07	-1.98734	-0.977678	-3.88758
	pseudo1	7379760	7380005	52	Pav_sc0000034.1_g120.1.mk	probable mitochondrial intermediate peptidase, mitochondrial	-2.99563	-4.58455	-4.72925	-1.25394	-2.21192	-0.129525	-2.78809	-0.0735675	0.714114	1.52673	-4.94632	0.690027	0.000244827	2.9196	3.73982	4.46657
	pseudo1	4181750	4181860	52	Pav_sc0000023.1_g390.1.br	UDP-glycosyltransferase 83A1-like	-1.05579	0.629421	0.138787	2.70691	0.233905	1.54111	3.09642	3.9667	1.65038	2.38762	2.83995	-0.0321585	0.0065875	1.76241	3.12657	2.09534
	pseudo10	546141	546295	52	Pav_sc0000600.1_g970.1.mk	hypothetical protein POPTR_0011s11520g	-5.38135	-4.47729	-2.08349	-0.497103	0.755936	2.39731	1.03522	-0.777076	2.13384	0.0165014	-5.09219	2.71109	1.28519e-11	4.65229	4.52577	4.63783
	pseudo10	2731902	2732240	52	Pav_sc0000624.1_g590.1.mk	uncharacterized membrane protein At1g06890	-1.7019	-2.56541	-3.39194	-0.272617	0.121068	1.2977	0.256896	0.532156	-2.25803	0.251347	0.883616	1.18332	1.65953e-10	2.93582	2.31795	3.21467
	pseudo11	2005854	2006285	52	Pav_sc0000700.1_g1360.1.mk	kinesin-like protein KIFC3	-1.16672	-2.59589	-1.76599	1.63648	1.12234	2.18734	1.50518	1.02328	1.26396	-3.04374	1.18469	0.145563	0.000528956	3.44298	3.00671	1.95181
	pseudo12	9475342	9475706	52	Pav_sc0000872.1_g110.1.mk	5'-adenylylsulfate reductase 3, chloroplastic-like	-4.08039	-6.64386	-6.64386	-0.360037	-1.76489	-0.985989	-0.30503	-2.53165	-1.2776	-6.31118	-4.13678	1.05275	5.49967e-09	4.31829	4.14005	4.7602
	pseudo12	4786366	4786624	52	Pav_sc0000830.1_g420.1.mk	nuclear cap-binding protein subunit 1	-2.3861	-4.98062	-3.76258	-2.63125	0.945007	-2.31493	0.0934562	-2.25858	-0.83729	-1.13348	-0.291309	1.2742	-8.45457e-13	2.94697	2.6294	3.63741
	pseudo12	7282657	7283147	52	Pav_sc0000852.1_g370.1.br	uncharacterized protein At2g29880-like isoform X1	1.46277	-1.84906	-3.78637	-3.90653	-4.79321	-2.30058	-2.1271	-1.45295	-0.410495	-0.239257	-5.11142	0.311343	0.00575965	-3.34492	-1.20598	-0.553249
	pseudo13	7641860	7642198	52	Pav_sc0000984.1_g080.1.br	probable leucine-rich repeat receptor-like serine/threonine-protein kinase At3g14840	-2.32591	-4.31063	-4.01261	-0.117059	-0.662441	-0.860493	2.29091	1.86715	-2.03233	-0.410423	0.207707	1.90188	3.83045e-05	2.75489	4.81656	4.1781
	pseudo14	10659070	10659620	52	Pav_sc0001134.1_g130.1.br	Unknown	-3.21502	-5.01729	-3.80645	-0.175652	-2.61238	-3.17222	0.675602	-0.794861	-0.591779	-2.34578	1.60811	0.674044	0.000788697	2.46516	3.7557	4.52648
	pseudo16	5946044	5946255	52	Pav_sc0001369.1_g510.1.br	cytosolic purine 5'-nucleotidase-like	-1.06395	-0.409946	-0.96369	2.471	0.639204	0.698185	-0.758914	0.0478359	1.38364	3.15052	1.4979	1.84799	0.00108219	2.32286	1.27983	3.13368
	pseudo16	2734664	2735072	52	Pav_sc0001323.1_g020.1.mk	multiple C2 and transmembrane domain-containing protein 2	-3.96104	-6.31054	-3.78637	-5.83876	-0.910749	0.141872	-1.35682	2.04966	-0.399604	-1.89017	0.22468	-2.76975	0.000419063	3.46869	5.14674	3.40827
	pseudo16	9485817	9486167	52	Pav_sc0001422.1_g120.1.mk	probable indole-3-acetic acid-amido synthetase GH3.1	-1.54483	-3.15356	-1.99368	1.31065	2.09152	-0.897817	0.591404	0.551387	-0.594259	0.0117837	-0.260829	-0.761394	0.00302709	3.3656	2.36362	1.78441
	pseudo16	1934897	1935008	52	Pav_sc0001309.1_g680.1.mk	RING-H2 finger protein ATL64-like	-2.8591	-3.97234	-1.19865	-2.83302	-3.30143	0.781702	-2.50628	-0.107734	2.60981	2.23055	-0.562909	-1.71974	0.000160307	1.62168	3.4998	3.15442
	pseudo17	8734660	8734907	52	Pav_sc0001623.1_g060.1.br	Unknown	-2.221	-3.76094	-1.92018	0.0720618	0.51065	2.42438	-0.549981	-1.44642	-2.18122	-3.48463	-0.00136998	0.041083	0.00201993	3.82758	1.20135	1.93822
	pseudo18	868658	868873	52	Pav_sc0001710.1_g210.1.br	hypothetical protein	-2.89877	-4.31063	-4.84627	1.31128	-0.135222	-2.7597	-1.0151	-4.78393	-2.40424	-0.77674	-5.92431	-0.907259	4.47427e-05	4.01307	1.71547	2.36999
	pseudo18	9000969	9001115	52	Pav_sc0001872.1_g020.1.br	hypothetical protein	-1.88031	-3.2081	-0.914548	-3.00983	2.27887	-0.79661	2.20138	2.2817	-0.623617	-2.11669	0.958281	-2.27377	0.000259354	2.60873	3.47333	1.38669
	pseudo18	4096951	4097075	52	Pav_sc0001778.1_g100.1.mk	hypothetical protein TCM_001304	-0.688757	-5.45801	-3.35348	-3.12457	2.07848	-3.32296	-0.800875	-3.07109	-2.57867	0.845168	-0.113604	2.44665	5.23849e-06	2.58248	0.215559	3.46324
	pseudo18	1807210	1807525	52	Pav_sc0001718.1_g240.1.mk	peroxidase A2-like	2.77619	0.231182	-1.20581	1.79311	2.01596	1.27208	-2.64875	-1.50789	-2.88962	0.920642	-0.973404	-1.80296	9.30568e-05	0.230824	-3.71062	-1.65328
	pseudo18	689904	690078	52	Pav_sc0001709.1_g130.1.mk	poly(A) RNA polymerase GLD2-like isoform X1	-5.28712	-5.60879	-1.5728	-5.6867	1.64975	-1.66677	-5.19661	0.500648	2.29786	-4.92545	-5.26942	2.71826	4.25524e-07	3.18321	4.05627	4.11848
	pseudo19	694383	694557	52	Pav_sc0001944.1_g100.1.mk	caffeoyl-CoA O-methyltransferase	-5.1321	-5.52525	-4.90723	-5.80828	2.91233	-4.94706	1.96185	-5.55167	1.88013	-5.94003	-5.75404	1.13058	0.000183362	6.50306	6.50676	4.73448
	pseudo19	3663949	3664150	52	Pav_sc0002045.1_g030.1.br	Unknown	-4.42113	-4.53713	-4.59652	-4.81213	-4.36505	1.97383	-4.73741	-4.84714	2.11654	-4.80151	2.21114	3.0127	8.8486e-05	4.93585	5.07182	6.6024
[truncated: 7,913 more rows]

## Sheet: Table S5
	Table S5. Differentially methylated regions among all the conditions (DMRs; log2FC > 3; FDR < 0.01) identified 2000 bp over genes for 'Kordia' using three biological replicates (R1, R2 and R3). Methylation level is indicated as the mean log2 enrichment in the DMR for each sample.
[truncated: 8,536 more rows]

[truncated: 5 more sheets: Table S6, Table S7, Table S8, Table S9, Table S10]
